# Supplementary material for: Zero-length photo-crosslinking by organoiridium catalyst for intracellular interactome mapping
Source: Research Square preprint supplement (doi:10.21203/rs.3.rs-3354321/v1), 2023-09-26
Supplement: Supplementary file 1 [file 18ea67b7e2b6e9fd1024f926.xlsx]

## Sheet: 0. Cover
		Zero-length photo-crosslinking by organoiridium catalyst for intracellular interactome mapping
		Jung Seung Nam1,2,6,7†,Myeong-Gyun Kang3†, Chang-Mo Yoo3,Chae Gyu Lee1,2,Jeong-Kon Seo4,5, Hyun-Woo Rhee3*, and Tae-Hyuk Kwon1,2* 1Department of Chemistry, Ulsan National Institute of Science and Technology (UNIST), Ulsan 44919, Republic of Korea 2Center for Wave Energy Materials, Ulsan National Institute of Science and Technology (UNIST), Ulsan 44919, Republic of Korea 3Department of Chemistry, …
		Supplementary Data 1. Proteome data obtained by POINT (photo-crosslinking labeling)

## Sheet: 1. MS results (imputation)
							Total Precusor Intensity (Imputation)																		Total peptide matched spectrum
							GBP-HaloTag-NLS			GBP-HaloTag-NLS/POU2F1-GFP			GBP-HaloTag-NLS/PSMA2-GFP			GBP-HaloTag-NLS/PTBP1-GFP			HaloTag vs POU2F1		HaloTag vs PSMA2		HaloTag vs PTBP1		GBP-HaloTag-NLS			GBP-HaloTag-NLS/POU2F1-GFP			GBP-HaloTag-NLS/PSMA2-GFP			GBP-HaloTag-NLS/PTBP1-GFP
Protein name	Gene	Protein accession numbers	Protein identification probability	Subcellular Localization	Functions	Transmembrane	Rep-1	Rep-2	Rep-3	Rep-1	Rep-2	Rep-3	Rep-1	Rep-2	Rep-3	Rep-1	Rep-2	Rep-3	Log2(Fold change)	-Log(P-Value)	Log2(Fold change)	-Log(P-Value)	Log2(Fold change)	-Log(P-Value)	Rep-1	Rep-2	Rep-3	Rep-1	Rep-2	Rep-3	Rep-1	Rep-2	Rep-3	Rep-1	Rep-2	Rep-3
Guanine nucleotide-binding protein G(s) subunit alpha isoforms short OS=Homo sapiens OX=9606 GN=GNAS PE=1 SV=1	GNAS	P63092,Q5JWF2	45665.4	#N/A	#N/A	#N/A	7.70021e+06	5.23762e+06	8.55851e+06	8.81518e+06	5.00294e+06	3.4548e+06	3.29449e+07	4.21332e+07	3.28504e+07	4.31919e+07	2.81331e+07	4.34713e+06	-0.315579	0.305231	2.32791	3.05596	1.81567	0.728527	7	4	6	8	6	5	7	7	8	4	6	5
Scaffold attachment factor B1 OS=Homo sapiens OX=9606 GN=SAFB PE=1 SV=4	SAFB	Q15424	102643	Nucleus {ECO:0000269|PubMed:19674106, ECO:0000269|PubMed:22693546}.	Binds to scaffold/matrix attachment region (S/MAR) DNA and forms a molecular assembly point to allow the formation of a 'transcriptosomal' complex (consisting of SR proteins and RNA polymerase II) coupling transcription and RNA processing (PubMed:9671816). Functions as an estrogen receptor corepressor and can also bind to the HSP27 promoter and decrease its transcription (PubMed:12660241). Thereb…	0	1.20357e+06	2.02953e+06	827052	1.91723e+06	1.83149e+06	3.81233e+06	4.06628e+06	3.66544e+06	4.14653e+06	1.14422e+07	4.66655e+06	4.14549e+06	0.897054	0.724053	1.54872	2.60448	2.31862	1.06738	0	0	2	0	0	2	2	2	4	4	2	4
Multifunctional protein ADE2 OS=Homo sapiens OX=9606 GN=PAICS PE=1 SV=3	PAICS	P22234	47080	0	0	0	5.51267e+06	3.98933e+06	1.22603e+06	7.84373e+06	5.3982e+06	3.4237e+06	4.35636e+06	5.97912e+06	2.06997e+07	5.13151e+06	5.5957e+06	4.12504e+06	0.635489	0.479967	1.53252	0.561782	0.469295	0.445013	4	0	2	6	4	3	0	0	11	0	0	3
Guanine nucleotide-binding protein G(i) subunit alpha OS=Homo sapiens OX=9606 GN=GNAI3 PE=1 SV=3	GNAI3	P08754	40533.5	Cytoplasm {ECO:0000269|PubMed:17635935}. Cell membrane {ECO:0000269|PubMed:17635935, ECO:0000269|PubMed:27864364}; Lipid-anchor {ECO:0000305}. Cytoplasm, cytoskeleton, microtubule organizing center, centrosome {ECO:0000269|PubMed:17635935}. Note=Localizes in the centrosomes of interphase and mitotic cells. Detected at the cleavage furrow and/or the midbody. {ECO:0000269|PubMed:17635935}.	Heterotrimeric guanine nucleotide-binding proteins (G proteins) function as transducers downstream of G protein-coupled receptors (GPCRs) in numerous signaling cascades. The alpha chain contains the guanine nucleotide binding site and alternates between an active, GTP-bound state and an inactive, GDP-bound state. Signaling by an activated GPCR promotes GDP release and GTP binding. The alpha subun…	0	1.43389e+07	1.60691e+07	10892913	8.33908e+06	1.18057e+07	1.11944e+07	3.53353e+07	4.68122e+07	3.54936e+07	4.90706e+07	3.68586e+07	1.17541e+07	-0.398209	0.827977	1.51014	2.46772	1.24194	0.78156	7	8	7	4	7	6	7	6	6	6	6	6
Alpha-enolase OS=Homo sapiens OX=9606 GN=ENO1 PE=1 SV=2	ENO1	P06733	47170.2	Cytoplasm {ECO:0000269|PubMed:10802057}. Cell membrane {ECO:0000269|PubMed:10802057}. Cytoplasm, myofibril, sarcomere, M line {ECO:0000269|PubMed:10802057}. Note=Can translocate to the plasma membrane in either the homodimeric (alpha/alpha) or heterodimeric (alpha/gamma) form. ENO1 is localized to the M line.; [Isoform MBP-1]: Nucleus.	Glycolytic enzyme the catalyzes the conversion of 2-phosphoglycerate to phosphoenolpyruvate (PubMed:29775581, PubMed:1369209). In addition to glycolysis, involved in various processes such as growth control, hypoxia tolerance and allergic responses (PubMed:2005901, PubMed:10802057, PubMed:12666133, PubMed:29775581). May also function in the intravascular and pericellular fibrinolytic system due t…	0	4.84061e+06	4.00942e+06	3.19352e+06	1.58976e+07	1.30638e+07	1.20745e+07	3.30694e+06	6.98736e+06	2.35753e+07	1.05176e+07	6.14617e+06	1.34767e+07	1.76863	2.83449	1.49173	0.50971	1.32344	1.29595	2	3	3	6	5	5	2	0	9	0	3	4
Acetyl-CoA carboxylase 1 OS=Homo sapiens OX=9606 GN=ACACA PE=1 SV=2	ACACA	Q13085	265556	Cytoplasm, cytosol {ECO:0000250|UniProtKB:Q5SWU9}.	Cytosolic enzyme that catalyzes the carboxylation of acetyl-CoA to malonyl-CoA, the first and rate-limiting step of de novo fatty acid biosynthesis (PubMed:20952656, PubMed:20457939, PubMed:29899443). This is a 2 steps reaction starting with the ATP-dependent carboxylation of the biotin carried by the biotin carboxyl carrier (BCC) domain followed by the transfer of the carboxyl group from carboxy…	0	3.59765e+07	5.73707e+07	3.46142e+07	3.09934e+07	3.7934e+07	6.17936e+07	1.18546e+08	1.4279e+08	9.00227e+07	1.2979e+08	9.5972e+07	7.95527e+07	0.030783	0.0259335	1.45724	1.93106	1.25459	1.63426	22	29	23	23	23	29	46	48	48	36	33	33
Thioredoxin OS=Homo sapiens OX=9606 GN=TXN PE=1 SV=3	TXN	P10599	11737.3	Nucleus {ECO:0000269|PubMed:11118054, ECO:0000269|PubMed:9108029}. Cytoplasm {ECO:0000269|PubMed:11118054, ECO:0000269|PubMed:9108029}. Secreted {ECO:0000269|PubMed:1332947}. Note=Translocates from the cytoplasm into the nucleus after phorbol 12-myristate 13-acetate induction (PMA) (PubMed:9108029). Predominantly in the cytoplasm in non irradiated cells (PubMed:11118054). Radiation induces transl…	Participates in various redox reactions through the reversible oxidation of its active center dithiol to a disulfide and catalyzes dithiol-disulfide exchange reactions (PubMed:2176490, PubMed:17182577, PubMed:19032234). Plays a role in the reversible S-nitrosylation of cysteine residues in target proteins, and thereby contributes to the response to intracellular nitric oxide. Nitrosylates the act…	0	4.3312e+06	3.61765e+06	4.1303e+06	5.73078e+06	1.21072e+07	1.4182e+07	8.58265e+06	1.4279e+07	9.0244e+06	1.95375e+07	1.6959e+07	1.04648e+07	1.40646	1.22375	1.40041	1.63687	1.95896	1.89617	2	2	0	0	3	3	0	2	3	3	3	2
Aldo-keto reductase family 1 member B1 OS=Homo sapiens OX=9606 GN=AKR1B1 PE=1 SV=3	AKR1B1	P15121	35853.9	Cytoplasm.	Catalyzes the NADPH-dependent reduction of a wide variety of carbonyl-containing compounds to their corresponding alcohols. Displays enzymatic activity towards endogenous metabolites such as aromatic and aliphatic aldehydes, ketones, monosacharides, bile acids and xenobiotics substrates. Key enzyme in the polyol pathway, catalyzes reduction of glucose to sorbitol during hyperglycemia (PubMed:1936…	0	2.5337e+06	3.59838e+06	3.29943e+06	6.44093e+06	6.55903e+06	7.80851e+06	5.284e+06	5.65103e+06	1.30888e+07	4.08494e+06	4.36235e+06	1.25519e+06	1.14161	2.66353	1.34891	0.884414	0.0408648	0.0291434	2	0	2	6	5	5	0	0	6	0	0	2
Host cell factor 1 OS=Homo sapiens OX=9606 GN=HCFC1 PE=1 SV=2	HCFC1	P51610	208724	Cytoplasm {ECO:0000269|PubMed:12235138}. Nucleus {ECO:0000269|PubMed:10623756, ECO:0000269|PubMed:12235138, ECO:0000269|PubMed:19188440, ECO:0000269|PubMed:20018852, ECO:0000269|PubMed:21285374, ECO:0000269|PubMed:23629655}. Note=HCFC1R1 modulates its subcellular localization and overexpression of HCFC1R1 leads to accumulation of HCFC1 in the cytoplasm (PubMed:12235138). Non-processed HCFC1 assoc…	Involved in control of the cell cycle (PubMed:10629049, PubMed:10779346, PubMed:15190068, PubMed:16624878, PubMed:23629655). Also antagonizes transactivation by ZBTB17 and GABP2; represses ZBTB17 activation of the p15(INK4b) promoter and inhibits its ability to recruit p300 (PubMed:10675337, PubMed:12244100). Coactivator for EGR2 and GABP2 (PubMed:12244100, PubMed:14532282). Tethers the chromatin…	0	2.61374e+06	1.58025e+06	2.05471e+06	733802	2.84663e+06	1.50305e+07	8.91918e+06	4.15649e+06	2.80109e+06	5.81643e+06	8.95544e+06	5.66805e+06	1.57452	0.388993	1.34529	0.788257	1.70976	1.88118	0	2	0	2	4	4	4	4	0	3	6	3
Obg-like ATPase 1 OS=Homo sapiens OX=9606 GN=OLA1 PE=1 SV=2	OLA1	Q9NTK5	44745.4	Cytoplasm {ECO:0000255|HAMAP-Rule:MF_03167, ECO:0000269|PubMed:20053727}. Nucleus {ECO:0000255|HAMAP-Rule:MF_03167, ECO:0000269|PubMed:20053727}. Nucleus, nucleolus {ECO:0000255|HAMAP-Rule:MF_03167, ECO:0000269|PubMed:20053727}. Note=Predominantly cytoplasmic, shuttles between the nucleus and the cytoplasm. {ECO:0000255|HAMAP-Rule:MF_03167}.	Hydrolyzes ATP, and can also hydrolyze GTP with lower efficiency. Has lower affinity for GTP. {ECO:0000255|HAMAP-Rule:MF_03167}.	0	1.37192e+06	1.58691e+06	393845	4.69681e+06	3.06303e+06	2.38686e+06	1.26399e+06	3.196e+06	3.91996e+06	1.7286e+06	2.20241e+06	2.10141e+06	1.59762	1.36051	1.32163	0.894379	0.847421	1.06439	0	0	2	3	2	2	0	0	3	0	0	0
Ezrin OS=Homo sapiens OX=9606 GN=EZR PE=1 SV=4	EZR	P15311	69414.7	Apical cell membrane {ECO:0000269|PubMed:18046454}; Peripheral membrane protein {ECO:0000269|PubMed:18046454}; Cytoplasmic side {ECO:0000269|PubMed:18046454}. Cell projection {ECO:0000269|PubMed:18046454}. Cell projection, microvillus membrane {ECO:0000269|PubMed:18046454}; Peripheral membrane protein {ECO:0000269|PubMed:18046454}; Cytoplasmic side {ECO:0000269|PubMed:18046454}. Cell projection, …	Probably involved in connections of major cytoskeletal structures to the plasma membrane. In epithelial cells, required for the formation of microvilli and membrane ruffles on the apical pole. Along with PLEKHG6, required for normal macropinocytosis. {ECO:0000269|PubMed:17881735, ECO:0000269|PubMed:18270268, ECO:0000269|PubMed:19111582}.	0	1.54817e+06	1.25621e+06	5.86677e+06	1.149e+07	7.79293e+06	4.72828e+06	3.34967e+06	3.17971e+06	1.49195e+07	3.16391e+06	6.63881e+06	9.75033e+06	1.46942	0.974639	1.30661	0.438993	1.1731	0.682407	2	2	5	5	5	3	0	0	5	0	0	5
Ras-related protein Rab-5C OS=Homo sapiens OX=9606 GN=RAB5C PE=1 SV=2	RAB5C	P51148	23482.7	Cell membrane {ECO:0000250}; Lipid-anchor {ECO:0000250}; Cytoplasmic side {ECO:0000250}. Early endosome membrane {ECO:0000250}; Lipid-anchor {ECO:0000250}. Melanosome {ECO:0000269|PubMed:17081065}. Note=Identified by mass spectrometry in melanosome fractions from stage I to stage IV.	Protein transport. Probably involved in vesicular traffic (By similarity). {ECO:0000250}.	0	1.02491e+07	3.98543e+06	1.11961e+07	1.65411e+07	4.72418e+06	1.94887e+07	1.86524e+07	2.64875e+07	1.77217e+07	2.1861e+07	1.27474e+07	1.04231e+07	0.68037	0.433283	1.30561	1.59648	0.824365	0.718236	3	3	4	4	3	5	4	4	4	4	3	3
Cytochrome c oxidase subunit 5B, mitochondrial OS=Homo sapiens OX=9606 GN=COX5B PE=1 SV=2	COX5B	P10606	13695.7	Mitochondrion inner membrane {ECO:0000269|PubMed:30030519}; Peripheral membrane protein {ECO:0000269|PubMed:30030519}; Matrix side {ECO:0000269|PubMed:30030519}.	Component of the cytochrome c oxidase, the last enzyme in the mitochondrial electron transport chain which drives oxidative phosphorylation. The respiratory chain contains 3 multisubunit complexes succinate dehydrogenase (complex II, CII), ubiquinol-cytochrome c oxidoreductase (cytochrome b-c1 complex, complex III, CIII) and cytochrome c oxidase (complex IV, CIV), that cooperate to transfer elect…	0	3.64937e+06	2.62177e+06	3.65786e+06	6.33782e+06	5.83865e+06	7.92846e+06	1.23448e+07	7.04649e+06	4.9806e+06	4.53864e+06	1.12912e+07	6.69223e+06	1.01783	2.03917	1.2955	1.01797	1.18162	0.973181	2	2	3	4	3	5	4	3	4	2	4	4
cAMP-dependent protein kinase type II-alpha regulatory subunit OS=Homo sapiens OX=9606 GN=PRKAR2A PE=1 SV=2	PRKAR2A	P13861	45518.8	Cytoplasm {ECO:0000269|PubMed:21423175}. Cell membrane {ECO:0000269|PubMed:21423175}. Note=Colocalizes with PJA2 in the cytoplasm and the cell membrane.	Regulatory subunit of the cAMP-dependent protein kinases involved in cAMP signaling in cells. Type II regulatory chains mediate membrane association by binding to anchoring proteins, including the MAP2 kinase.	0	1.03008e+06	3.92171e+06	2.29175e+06	2.08682e+06	7.31295e+06	3.64647e+06	3.94172e+06	9.5266e+06	4.14049e+06	9.4316e+06	4.3388e+06	4.61149e+06	0.848866	0.476734	1.28153	0.793082	1.34352	0.936521	2	2	3	2	4	3	4	5	4	3	0	3
Alpha-aminoadipic semialdehyde synthase, mitochondrial OS=Homo sapiens OX=9606 GN=AASS PE=1 SV=1	AASS	Q9UDR5	102135	Mitochondrion {ECO:0000250}.	Bifunctional enzyme that catalyzes the first two steps in lysine degradation. The N-terminal and the C-terminal contain lysine-ketoglutarate reductase and saccharopine dehydrogenase activity, respectively.	0	1.82852e+06	2.04711e+06	2.00049e+06	1.07841e+06	5.2528e+06	5.89894e+06	3.14443e+06	3.05977e+06	7.98384e+06	3.23679e+06	4.42543e+06	3.80964e+06	1.05751	0.630925	1.27174	0.784749	0.965164	2.22602	2	2	2	2	6	5	0	0	6	0	0	0
RuvB-like 2 OS=Homo sapiens OX=9606 GN=RUVBL2 PE=1 SV=3	RUVBL2	Q9Y230	51158.1	Nucleus matrix. Nucleus, nucleoplasm. Cytoplasm. Membrane. Note=Mainly localized in the nucleus, associated with nuclear matrix or in the nuclear cytosol. Although it is also present in the cytoplasm and associated with the cell membranes.	Possesses single-stranded DNA-stimulated ATPase and ATP-dependent DNA helicase (5' to 3') activity; hexamerization is thought to be critical for ATP hydrolysis and adjacent subunits in the ring-like structure contribute to the ATPase activity (PubMed:10428817, PubMed:17157868). Component of the NuA4 histone acetyltransferase complex which is involved in transcriptional activation of select genes …	0	3.34724e+06	3.38053e+06	2.27485e+06	7.82593e+06	1.53643e+07	6.0215e+06	5.76098e+06	5.86114e+06	1.0056e+07	5.04202e+06	5.62318e+06	6.16099e+06	1.69813	1.09817	1.26782	1.35177	0.902291	2.23462	2	2	2	5	6	2	0	0	5	0	0	4
Protein CIP2A OS=Homo sapiens OX=9606 GN=CIP2A PE=1 SV=2	CIP2A	Q8TCG1	102189	Membrane {ECO:0000305}; Single-pass membrane protein {ECO:0000305}. Cytoplasm {ECO:0000269|PubMed:12118381}. Note=Slightly concentrates in the perinuclear region (PubMed:12118381). {ECO:0000269|PubMed:12118381}.	Oncoprotein that inhibits PP2A and stabilizes MYC in human malignancies. Promotes anchorage-independent cell growth and tumor formation. {ECO:0000269|PubMed:17632056}.	TRANSMEM 192..212; /note="Helical"; /evidence="ECO:0000255"	717864	727893	739169	1.15619e+06	1.01622e+06	826271	1.72625e+06	1.95512e+06	1.57944e+06	1.29628e+06	1.45615e+06	1.16976e+06	0.456742	1.32534	1.2677	3.14017	0.844076	2.65203	0	2	0	2	0	2	2	2	4	0	0	0
DBIRD complex subunit ZNF326 OS=Homo sapiens OX=9606 GN=ZNF326 PE=1 SV=2	ZNF326	Q5BKZ1	65653.5	Nucleus matrix {ECO:0000250}.	Core component of the DBIRD complex, a multiprotein complex that acts at the interface between core mRNP particles and RNA polymerase II (RNAPII) and integrates transcript elongation with the regulation of alternative splicing: the DBIRD complex affects local transcript elongation rates and alternative splicing of a large set of exons embedded in (A + T)-rich DNA regions. May play a role in neuro…	0	6.06271e+06	2.54377e+06	4.2955e+06	1.12265e+07	1.99801e+07	7.01928e+06	1.80741e+06	2.25701e+06	2.68034e+07	4.48604e+06	5.5752e+06	1.72332e+07	1.56696	1.00246	1.25851	0.291166	1.08101	0.498253	3	2	5	3	6	0	2	2	7	4	4	9
Sphingosine-1-phosphate lyase 1 OS=Homo sapiens OX=9606 GN=SGPL1 PE=1 SV=3	SGPL1	O95470	63525.9	Endoplasmic reticulum membrane {ECO:0000269|PubMed:14570870}; Single-pass type III membrane protein {ECO:0000255}; Cytoplasmic side {ECO:0000250|UniProtKB:Q8R0X7}.	Cleaves phosphorylated sphingoid bases (PSBs), such as sphingosine-1-phosphate, into fatty aldehydes and phosphoethanolamine. Elevates stress-induced ceramide production and apoptosis (PubMed:11018465, PubMed:14570870, PubMed:24809814, PubMed:28165339). Required for global lipid homeostasis in liver and cholesterol homeostasis in fibroblasts. Involved in the regulation of pro-inflammatory respons…	TRANSMEM 41..61; /note="Helical; Signal-anchor for type III membrane protein"; /evidence="ECO:0000255"	729546	1.24295e+06	500845	720056	461363	624782	858067	2.65703e+06	2.30268e+06	1.85927e+06	1.08574e+06	1.34891e+06	-0.453501	0.406513	1.23401	0.876278	0.795836	0.89622	0	0	2	0	2	0	0	2	2	0	0	0
Myocardin-related transcription factor B OS=Homo sapiens OX=9606 GN=MRTFB PE=1 SV=3	MRTFB	Q9ULH7	118128	Nucleus {ECO:0000250}.	Acts as a transcriptional coactivator of serum response factor (SRF). Required for skeletal myogenic differentiation. {ECO:0000269|PubMed:14565952}.	0	1.22411e+06	708466	752567	847409	881478	1.0476e+06	2.88001e+06	2.06851e+06	1.35293e+06	4.44859e+06	1.8102e+06	1.80056e+06	0.0482647	0.0598771	1.23069	1.20291	1.58567	0.934342	0	2	0	0	0	0	3	2	0	3	0	0
Zinc finger MYM-type protein 3 OS=Homo sapiens OX=9606 GN=ZMYM3 PE=1 SV=2	ZMYM3	Q14202	152380	Nucleus {ECO:0000250}.	Plays a role in the regulation of cell morphology and cytoskeletal organization. {ECO:0000269|PubMed:21834987}.	0	1.50545e+06	1.71872e+06	901988	1.80719e+06	1.75224e+06	2.33879e+06	2.33438e+06	3.49154e+06	3.65876e+06	3.59676e+06	2.68992e+06	3.0898e+06	0.515483	0.894521	1.2008	1.68073	1.18425	2.08798	0	0	2	0	0	0	0	3	0	0	0	0
Asparagine--tRNA ligase, cytoplasmic OS=Homo sapiens OX=9606 GN=NARS1 PE=1 SV=1	NARS1	O43776	62944.3	Cytoplasm {ECO:0000305|PubMed:9421509}.	Catalyzes the attachment of asparagine to tRNA(Asn) in a two-step reaction: asparagine is first activated by ATP to form Asn-AMP and then transferred to the acceptor end of tRNA(Asn) (PubMed:9421509). In addition to its essential role in protein synthesis, acts as a signaling molecule that induced migration of CCR3-expressing cells (PubMed:30171954, PubMed:12235211). {ECO:0000269|PubMed:12235211,…	0	1.02624e+06	1.5903e+06	2.13861e+06	5.3277e+06	1.86021e+06	2.00251e+06	1.96657e+06	3.61503e+06	4.9369e+06	2.34032e+06	2.41945e+06	3.28865e+06	0.950639	0.55656	1.14536	0.981698	0.759212	1.1677	2	0	3	6	0	2	0	0	4	0	0	0
Leukotriene A-4 hydrolase OS=Homo sapiens OX=9606 GN=LTA4H PE=1 SV=2	LTA4H	P09960	69287.1	Cytoplasm.	Epoxide hydrolase that catalyzes the final step in the biosynthesis of the proinflammatory mediator leukotriene B4. Has also aminopeptidase activity. {ECO:0000269|PubMed:11917124, ECO:0000269|PubMed:12207002, ECO:0000269|PubMed:15078870, ECO:0000269|PubMed:18804029, ECO:0000269|PubMed:1897988, ECO:0000269|PubMed:1975494, ECO:0000269|PubMed:2244921}.	0	900122	2.2512e+06	801154	5.84718e+06	3.07228e+06	1.68102e+06	1.99258e+06	3.91314e+06	2.81413e+06	2.58911e+06	1.86428e+06	1.25674e+06	1.4233	0.779378	1.14155	1.02654	0.530768	0.410833	2	2	2	5	3	2	0	0	4	0	0	2
U4/U6.U5 tri-snRNP-associated protein 2 OS=Homo sapiens OX=9606 GN=USP39 PE=1 SV=2	USP39	Q53GS9	65382.4	Nucleus {ECO:0000269|PubMed:11350945, ECO:0000269|PubMed:26912367}.	Plays a role in pre-mRNA splicing as a component of the U4/U6-U5 tri-snRNP, one of the building blocks of the precatalytic spliceosome (PubMed:11350945, PubMed:26912367). Regulates AURKB mRNA levels, and thereby plays a role in cytokinesis and in the spindle checkpoint. Does not have ubiquitin-specific peptidase activity (PubMed:18728397). {ECO:0000269|PubMed:11350945, ECO:0000269|PubMed:18728397…	0	1.58312e+06	1.59026e+06	1.55313e+06	5.05619e+06	3.42117e+06	2.87191e+06	2.62946e+06	3.00508e+06	4.70953e+06	4.81914e+06	2.43484e+06	2.19391e+06	1.26375	1.55004	1.12996	1.36639	0.999218	0.874367	3	0	2	3	2	0	0	0	0	0	0	0
OS=Homo sapiens OX=9606 GN=PSMA2-GFP PE=2 SV=1	PSMA2-GFP	BMSR04	53060.1	#N/A	#N/A	#N/A	1.02508e+07	1.20183e+07	1.4195e+07	1.08274e+07	1.7436e+07	1.09194e+07	3.22735e+07	3.09152e+07	1.52951e+07	1.73839e+07	1.33355e+07	1.38067e+07	0.103744	0.135492	1.10592	1.1832	0.288175	0.717142	0	0	0	0	0	0	13	11	8	0	0	0
116 kDa U5 small nuclear ribonucleoprotein component OS=Homo sapiens OX=9606 GN=EFTUD2 PE=1 SV=1	EFTUD2	Q15029	109438	Nucleus {ECO:0000269|PubMed:20858735, ECO:0000269|PubMed:26912367, ECO:0000269|PubMed:28076346, ECO:0000269|PubMed:28502770, ECO:0000269|PubMed:28781166, ECO:0000269|PubMed:29301961, ECO:0000269|PubMed:29360106, ECO:0000269|PubMed:29361316, ECO:0000269|PubMed:30315277, ECO:0000269|PubMed:30705154}.	Required for pre-mRNA splicing as component of the spliceosome, including pre-catalytic, catalytic and post-catalytic spliceosomal complexes (PubMed:28502770, PubMed:28781166, PubMed:28076346, PubMed:29361316, PubMed:30315277, PubMed:29360106, PubMed:29301961, PubMed:30705154). Component of the U5 snRNP and the U4/U6-U5 tri-snRNP complex, a building block of the spliceosome (PubMed:16723661). {EC…	0	5.22231e+06	5.77779e+06	2.04141e+07	3.82966e+07	3.13808e+07	2.33536e+07	1.35944e+07	1.21731e+07	4.09066e+07	1.12581e+07	1.00302e+07	4.49041e+07	1.5663	1.44875	1.08571	0.48239	1.07525	0.392682	4	3	11	19	12	9	0	0	14	0	5	17
Pre-mRNA-processing factor 19 OS=Homo sapiens OX=9606 GN=PRPF19 PE=1 SV=1	PRPF19	Q9UMS4	55181.3	Nucleus {ECO:0000269|PubMed:11082287, ECO:0000269|PubMed:12429849, ECO:0000269|PubMed:19188445, ECO:0000269|PubMed:20176811, ECO:0000269|PubMed:28076346, ECO:0000269|PubMed:28502770, ECO:0000269|PubMed:29301961, ECO:0000269|PubMed:29360106, ECO:0000269|PubMed:30705154}. Nucleus, nucleoplasm {ECO:0000269|PubMed:11082287}. Cytoplasm, cytoskeleton, spindle {ECO:0000269|PubMed:11082287}. Cytoplasm {E…	Ubiquitin-protein ligase which is a core component of several complexes mainly involved pre-mRNA splicing and DNA repair. Required for pre-mRNA splicing as component of the spliceosome (PubMed:28502770, PubMed:28076346, PubMed:29360106, PubMed:29301961, PubMed:30705154). Core component of the PRP19C/Prp19 complex/NTC/Nineteen complex which is part of the spliceosome and participates in its assemb…	0	3.8564e+06	3.68002e+06	9.90344e+06	3.17105e+07	2.18999e+07	1.46915e+07	8.28614e+06	7.34748e+06	2.13523e+07	8.66126e+06	5.07182e+06	2.95069e+07	1.96954	1.4725	1.08459	0.586074	1.30998	0.472569	3	3	6	11	10	6	0	0	10	0	4	9
Palmitoyl-protein thioesterase ABHD10, mitochondrial OS=Homo sapiens OX=9606 GN=ABHD10 PE=1 SV=1	ABHD10	Q9NUJ1	33933.3	Mitochondrion {ECO:0000305}.	Catalyzes the deglucuronidation of mycophenolic acid acyl-glucuronide, a metabolite of the immunosuppressant drug mycophenolate. {ECO:0000269|PubMed:22294686}.	0	1.47776e+06	2.1598e+06	3.21314e+06	3.80904e+06	2.75727e+06	1.7938e+06	2.71036e+06	7.13041e+06	4.31723e+06	5.3952e+06	3.56028e+06	3.57825e+06	0.287272	0.260182	1.04729	0.812849	0.871492	1.12664	0	0	0	3	2	2	0	2	2	2	0	0
Stress-induced-phosphoprotein 1 OS=Homo sapiens OX=9606 GN=STIP1 PE=1 SV=1	STIP1	P31948	62642.1	Cytoplasm {ECO:0000250|UniProtKB:Q60864}. Nucleus {ECO:0000250|UniProtKB:Q60864}.	Acts as a co-chaperone for HSP90AA1 (PubMed:27353360). Mediates the association of the molecular chaperones HSPA8/HSC70 and HSP90 (By similarity). {ECO:0000250|UniProtKB:O35814, ECO:0000303|PubMed:27353360}.	0	5.15791e+06	5.86516e+06	5.0572e+06	9.21905e+06	9.59683e+06	1.19925e+07	9.51212e+06	1.46223e+07	8.80833e+06	1.25325e+07	1.34332e+07	9.95972e+06	0.938032	2.25213	1.03467	1.41523	1.15971	2.4567	3	4	4	4	5	6	4	6	7	3	4	4
Ataxin-10 OS=Homo sapiens OX=9606 GN=ATXN10 PE=1 SV=1	ATXN10	Q9UBB4	53490.8	Cytoplasm, perinuclear region {ECO:0000269|PubMed:16498633}.	Necessary for the survival of cerebellar neurons. Induces neuritogenesis by activating the Ras-MAP kinase pathway. May play a role in the maintenance of a critical intracellular glycosylation level and homeostasis. {ECO:0000250}.	0	316206	678256	852132	1.00618e+06	907104	1.28354e+06	1.09254e+06	1.53353e+06	1.15631e+06	1.75635e+06	981897	950982	0.791775	1.09116	1.03443	1.43315	0.998454	0.935038	2	0	0	0	0	0	2	2	2	2	0	2
Methionine synthase OS=Homo sapiens OX=9606 GN=MTR PE=1 SV=2	MTR	Q99707	140532	Cytoplasm.	Catalyzes the transfer of a methyl group from methylcob(III)alamin (MeCbl) to homocysteine, yielding enzyme-bound cob(I)alamin and methionine in the cytosol (PubMed:27771510). MeCbl is an active form of cobalamin (vitamin B12) used as a cofactor for methionine biosynthesis. Cob(I)alamin form is regenerated to MeCbl by a transfer of a methyl group from 5-methyltetrahydrofolate (PubMed:27771510). T…	0	347370	630559	989013	1.49462e+06	1.26164e+06	1.20957e+06	921600	1.47525e+06	1.62919e+06	1.86643e+06	1.75141e+06	1.84648e+06	1.01167	1.50158	1.03341	1.13677	1.47409	2.45489	2	0	0	0	0	0	0	0	0	0	0	0
Testis-expressed protein 10 OS=Homo sapiens OX=9606 GN=TEX10 PE=1 SV=2	TEX10	Q9NXF1	105678	Nucleus, nucleoplasm {ECO:0000250|UniProtKB:Q3URQ0}. Cytoplasm {ECO:0000250|UniProtKB:Q3URQ0}. Nucleus, nucleolus {ECO:0000269|PubMed:12429849, ECO:0000269|PubMed:21326211}. Note=Mainly found in the nucleoplasm, with low levels detected in the cytoplasmic and chromatin fractions. {ECO:0000250|UniProtKB:Q3URQ0}.	Functions as a component of the Five Friends of Methylated CHTOP (5FMC) complex; the 5FMC complex is recruited to ZNF148 by methylated CHTOP, leading to desumoylation of ZNF148 and subsequent transactivation of ZNF148 target genes (PubMed:22872859). Component of the PELP1 complex involved in the nucleolar steps of 28S rRNA maturation and the subsequent nucleoplasmic transit of the pre-60S ribosom…	0	2.28577e+06	3.93153e+06	1.29176e+06	2.60716e+06	2.87736e+06	3.39268e+06	3.15327e+06	7.74011e+06	4.42796e+06	5.96287e+06	3.51472e+06	1.43133e+06	0.241474	0.221374	1.02884	0.763809	0.538805	0.303568	0	2	2	3	2	2	2	5	3	2	0	2
Transcriptional regulator Kaiso OS=Homo sapiens OX=9606 GN=ZBTB33 PE=1 SV=2	ZBTB33	Q86T24	74486.5	Nucleus {ECO:0000269|PubMed:15781635, ECO:0000269|PubMed:16354688}. Cytoplasm {ECO:0000269|PubMed:15781635}. Note=Also cytoplasmic in cells grown at high densities.	Transcriptional regulator with bimodal DNA-binding specificity. Binds to methylated CpG dinucleotides in the consensus sequence 5'-CGCG-3' and also binds to the non-methylated consensus sequence 5'-CTGCNA-3' also known as the consensus kaiso binding site (KBS). Recruits the N-CoR repressor complex to promote histone deacetylation and the formation of repressive chromatin structures in target gene…	0	1.18181e+07	13579715	9.73442e+06	9.06247e+06	9.04884e+06	1.24824e+07	2.67335e+07	3.09704e+07	1.37648e+07	3.4014e+07	2.41683e+07	1.84954e+07	-0.199561	0.402049	1.02452	1.07553	1.12601	1.38433	8	8	7	6	5	7	9	10	8	9	8	10
Kinesin-like protein KIF11 OS=Homo sapiens OX=9606 GN=KIF11 PE=1 SV=2	KIF11	P52732	119162	Cytoplasm {ECO:0000269|PubMed:19001501, ECO:0000269|PubMed:23857769}. Cytoplasm, cytoskeleton, spindle pole {ECO:0000269|PubMed:19001501}.	Motor protein required for establishing a bipolar spindle during mitosis (PubMed:19001501). Required in non-mitotic cells for transport of secretory proteins from the Golgi complex to the cell surface (PubMed:23857769). {ECO:0000269|PubMed:19001501, ECO:0000269|PubMed:23857769}.	0	642297	930255	1.0927e+06	1.71649e+06	2.55642e+06	1.69508e+06	1.89487e+06	1.94082e+06	1.56837e+06	2.84008e+06	1.93131e+06	1.95855e+06	1.16297	1.61199	1.01977	2.17936	1.33632	1.84692	2	0	2	2	2	0	2	0	4	0	0	0
Hexokinase-2 OS=Homo sapiens OX=9606 GN=HK2 PE=1 SV=2	HK2	P52789	102381	Mitochondrion outer membrane {ECO:0000269|PubMed:18350175}; Peripheral membrane protein {ECO:0000305}. Cytoplasm, cytosol {ECO:0000269|PubMed:18350175}. Note=The mitochondrial-binding peptide (MBP) region promotes association with the mitochondrial outer membrane (PubMed:29298880). The interaction with the mitochondrial outer membrane via the mitochondrial-binding peptide (MBP) region promotes hi…	Catalyzes the phosphorylation of hexose, such as D-glucose and D-fructose, to hexose 6-phosphate (D-glucose 6-phosphate and D-fructose 6-phosphate, respectively) (PubMed:23185017, PubMed:26985301, PubMed:29298880). Mediates the initial step of glycolysis by catalyzing phosphorylation of D-glucose to D-glucose 6-phosphate (PubMed:29298880). Plays a key role in maintaining the integrity of the oute…	0	5.4034e+06	4.1183e+06	4.04364e+06	4.99946e+06	1.16399e+07	1.28093e+07	8.60697e+06	7.06622e+06	1.17519e+07	7.43556e+06	8.01634e+06	8.01388e+06	1.11827	1.00499	1.01557	1.47914	0.790633	2.62395	4	0	4	4	6	6	5	4	7	0	0	0
Keratinocyte proline-rich protein OS=Homo sapiens OX=9606 GN=KPRP PE=1 SV=1	KPRP	Q5T749	64132.6	Cytoplasm {ECO:0000250}.	0	0	3.00125e+06	4.1197e+06	2.92896e+06	1.7324e+06	2.50488e+06	1.53946e+06	1.33471e+07	4.63706e+06	2.32206e+06	4.50792e+06	2.38895e+07	4.25757e+06	-0.798853	1.3705	1.01474	0.433201	1.70012	0.506181	0	0	0	2	0	2	7	0	0	0	8	0
Glutamate dehydrogenase 1, mitochondrial OS=Homo sapiens OX=9606 GN=GLUD1 PE=1 SV=2	GLUD1	P00367	61399.7	Mitochondrion {ECO:0000269|PubMed:19448744}. Endoplasmic reticulum {ECO:0000269|PubMed:19448744}. Note=Mostly translocates into the mitochondria, only a small amount of the protein localizes to the endoplasmic reticulum. {ECO:0000269|PubMed:19448744}.	Mitochondrial glutamate dehydrogenase that catalyzes the conversion of L-glutamate into alpha-ketoglutarate. Plays a key role in glutamine anaplerosis by producing alpha-ketoglutarate, an important intermediate in the tricarboxylic acid cycle (PubMed:11032875, PubMed:16959573, PubMed:11254391, PubMed:16023112). Plays a role in insulin homeostasis (PubMed:9571255, PubMed:11297618). May be involved…	0	4.60112e+06	4.31672e+06	5.48759e+06	9.24387e+06	6.21007e+06	1.13425e+07	7.0088e+06	9.14052e+06	1.28982e+07	8.84401e+06	9.62192e+06	1.25762e+07	0.895426	1.26591	1.0118	1.30143	1.10761	2.01796	2	2	2	3	3	5	0	3	4	0	0	3
39S ribosomal protein S18a, mitochondrial OS=Homo sapiens OX=9606 GN=MRPS18A PE=1 SV=1	MRPS18A	Q9NVS2	22184.5	Mitochondrion {ECO:0000269|PubMed:25278503, ECO:0000269|PubMed:25838379, ECO:0000269|PubMed:28892042}.	0	0	921477	1.28243e+06	676825	1.21138e+06	1.70824e+06	1.84407e+06	1.42737e+06	1.94847e+06	2.41261e+06	2.42176e+06	1.67912e+06	1.53468e+06	0.725646	1.13264	1.00674	1.35416	0.968127	1.31786	0	2	2	0	2	0	0	0	0	0	0	0
Glucose-6-phosphate isomerase OS=Homo sapiens OX=9606 GN=GPI PE=1 SV=4	GPI	P06744	63148.5	Cytoplasm {ECO:0000269|PubMed:11437381}. Secreted {ECO:0000269|PubMed:11437381}.	In the cytoplasm, catalyzes the conversion of glucose-6-phosphate to fructose-6-phosphate, the second step in glycolysis, and the reverse reaction during gluconeogenesis (PubMed:28803808). Besides it's role as a glycolytic enzyme, also acts as a secreted cytokine: acts as an angiogenic factor (AMF) that stimulates endothelial cell motility (PubMed:11437381). Acts as a neurotrophic factor, neurole…	0	2.1676e+06	2.26035e+06	3.47273e+06	9.3996e+06	3.71754e+06	5.16851e+06	3.18404e+06	3.35966e+06	9.25869e+06	4.64347e+06	5.18616e+06	5.19846e+06	1.21066	0.921121	1.00009	0.574739	0.927612	2.18043	2	3	2	5	4	5	0	0	6	0	0	4
Kinetochore-associated protein 1 OS=Homo sapiens OX=9606 GN=KNTC1 PE=1 SV=1	KNTC1	P50748	250759	Cytoplasm. Nucleus. Chromosome, centromere, kinetochore. Cytoplasm, cytoskeleton, spindle. Note=Dynamic pattern of localization during the cell cycle. At interphase, uniformly distributed throughout the cytoplasm and nucleus. By prophase and until late stages of prometaphase, a fraction of the total pool is concentrated at kinetochores. By metaphase, detected at kinetochores, along spindle fibers…	Essential component of the mitotic checkpoint, which prevents cells from prematurely exiting mitosis. Required for the assembly of the dynein-dynactin and MAD1-MAD2 complexes onto kinetochores (PubMed:11146660, PubMed:11590237, PubMed:15824131). Its function related to the spindle assembly machinery is proposed to depend on its association in the mitotic RZZ complex. {ECO:0000269|PubMed:11146660,…	0	986950	1.73432e+06	500700	1.22116e+06	1.42591e+06	1.57925e+06	1.65648e+06	2.14397e+06	2.62951e+06	2.90173e+06	1.67268e+06	1.9089e+06	0.39146	0.376038	0.996867	1.10356	1.00879	0.979636	0	0	2	0	0	0	0	0	0	0	0	0
WD repeat-containing protein 1 OS=Homo sapiens OX=9606 GN=WDR1 PE=1 SV=4	WDR1	O75083	66193.2	Cytoplasm, cytoskeleton {ECO:0000250|UniProtKB:Q5RKI0}. Cell projection, podosome {ECO:0000269|PubMed:22721921}. Cell junction {ECO:0000269|PubMed:25792565}.	Induces disassembly of actin filaments in conjunction with ADF/cofilin family proteins (PubMed:15629458). Enhances cofilin-mediated actin severing (By similarity). Involved in cytokinesis. Involved in chemotactic cell migration by restricting lamellipodial membrane protrusions (PubMed:18494608). Involved in myocardium sarcomere organization. Required for cardiomyocyte growth and maintenance (By s…	0	3.31408e+06	3.66779e+06	3.35141e+06	7.86897e+06	2.97992e+06	4.24381e+06	3.33775e+06	6.33344e+06	1.09346e+07	6.05321e+06	5.00185e+06	2.77716e+06	0.546553	0.467163	0.995754	0.706503	0.420735	0.528011	0	0	0	4	2	2	0	0	6	0	0	0
Peptidyl-prolyl cis-trans isomerase B OS=Homo sapiens OX=9606 GN=PPIB PE=1 SV=2	PPIB	P23284	23743.2	Virion {ECO:0000269|PubMed:20147391}. Note=(Microbial infection).; Endoplasmic reticulum lumen {ECO:0000269|PubMed:1530944}. Melanosome {ECO:0000269|PubMed:17081065}. Note=Identified by mass spectrometry in melanosome fractions from stage I to stage IV (PubMed:17081065). {ECO:0000269|PubMed:17081065}.	PPIase that catalyzes the cis-trans isomerization of proline imidic peptide bonds in oligopeptides and may therefore assist protein folding. {ECO:0000269|PubMed:20676357}.	0	9.21476e+06	9.63736e+06	1.0515e+07	1.31757e+07	1.85804e+07	3.30048e+07	2.20406e+07	1.66283e+07	1.95849e+07	1.6688e+07	2.36401e+07	1.38277e+07	1.14092	0.929804	0.988153	2.40497	0.882915	1.31672	3	4	4	3	6	6	4	4	5	4	4	4
Inositol polyphosphate 5-phosphatase OCRL OS=Homo sapiens OX=9606 GN=OCRL PE=1 SV=3	OCRL	Q01968	104208	Cytoplasmic vesicle, phagosome membrane {ECO:0000250|UniProtKB:D3ZGS3}. Early endosome membrane {ECO:0000269|PubMed:21971085, ECO:0000269|PubMed:25869668}. Membrane, clathrin-coated pit {ECO:0000269|PubMed:25869668}. Cell projection, cilium, photoreceptor outer segment {ECO:0000269|PubMed:22543976}. Cell projection, cilium {ECO:0000269|PubMed:22543976}. Cytoplasmic vesicle {ECO:0000250|UniProtKB:…	Catalyzes the hydrolysis of the 4-position phosphate of phosphatidylinositol 4,5-bisphosphate (PtdIns(4,5)P2) and phosphatidylinositol-3,4,5-bisphosphate (PtdIns(3,4,5)P3), with the greatest catalytic activity towards PtdIns(4,5)P2 (PubMed:7761412, PubMed:15474001, PubMed:9430698, PubMed:10764818). Able also to hydrolyzes the 4-phosphate of inositol 1,4,5-trisphosphate and of inositol 1,3,4,5-tet…	0	1.34721e+06	1.45512e+06	752116	1.51146e+06	677060	1.46991e+06	1.84003e+06	3.22632e+06	1.95302e+06	1.17037e+06	2.10253e+06	1.8608e+06	0.0416025	0.0335945	0.981716	1.09643	0.53037	0.673877	0	0	3	0	0	0	0	0	0	0	0	0
GTP-binding protein SAR1a OS=Homo sapiens OX=9606 GN=SAR1A PE=1 SV=1	SAR1A	Q9NR31	22367.8	Endoplasmic reticulum {ECO:0000250}. Golgi apparatus {ECO:0000250}.	Involved in transport from the endoplasmic reticulum to the Golgi apparatus (By similarity). Required to maintain SEC16A localization at discrete locations on the ER membrane perhaps by preventing its dissociation. SAR1A-GTP-dependent assembly of SEC16A on the ER membrane forms an organized scaffold defining endoplasmic reticulum exit sites (ERES). {ECO:0000250, ECO:0000269|PubMed:17005010}.	0	3.31321e+06	5.05465e+06	4.0131e+06	8.16537e+06	3.32867e+06	5.45079e+06	1.36736e+07	6.77742e+06	3.9749e+06	7.10174e+06	1.28559e+07	8.9495e+06	0.452723	0.438299	0.980291	0.616368	1.2233	1.44621	2	0	3	3	3	3	4	0	2	0	2	3
Cytochrome c oxidase subunit 2 OS=Homo sapiens OX=9606 GN=MT-CO2 PE=1 SV=1	MT-CO2	P00403	25566.4	Mitochondrion inner membrane {ECO:0000269|PubMed:30030519}; Multi-pass membrane protein {ECO:0000269|PubMed:30030519}.	Component of the cytochrome c oxidase, the last enzyme in the mitochondrial electron transport chain which drives oxidative phosphorylation. The respiratory chain contains 3 multisubunit complexes succinate dehydrogenase (complex II, CII), ubiquinol-cytochrome c oxidoreductase (cytochrome b-c1 complex, complex III, CIII) and cytochrome c oxidase (complex IV, CIV), that cooperate to transfer elect…	TRANSMEM 15..45; /note="Helical; Name=I"; /evidence="ECO:0000250|UniProtKB:P68530"; TRANSMEM 60..87; /note="Helical; Name=II"; /evidence="ECO:0000250|UniProtKB:P68530"	6.91829e+06	9.72651e+06	1.17308e+07	1.12855e+07	2.08508e+07	1.84791e+07	2.30542e+07	1.33819e+07	1.93655e+07	1.57763e+07	12966430	1.32325e+07	0.834929	1.09035	0.975656	1.3584	0.564889	1.28193	3	3	5	4	6	6	4	4	6	4	3	3
40S ribosomal protein S12 OS=Homo sapiens OX=9606 GN=RPS12 PE=1 SV=3	RPS12	P25398	14514.8	Cytoplasm.	0	0	4.96222e+06	1.95963e+06	2.04735e+06	1.81429e+06	2.45911e+06	1.76195e+06	7.69632e+06	8.24695e+06	1.39795e+06	1.23175e+07	9.40363e+06	6.83686e+06	-0.571542	0.410643	0.951152	0.50721	1.67084	1.604	2	2	2	2	0	2	3	4	2	4	4	3
Splicing factor U2AF 65 kDa subunit OS=Homo sapiens OX=9606 GN=U2AF2 PE=1 SV=4	U2AF2	P26368	53501.2	Nucleus.	Plays a role in pre-mRNA splicing and 3'-end processing (PubMed:17024186). By recruiting PRPF19 and the PRP19C/Prp19 complex/NTC/Nineteen complex to the RNA polymerase II C-terminal domain (CTD), and thereby pre-mRNA, may couple transcription to splicing (PubMed:21536736). Induces cardiac troponin-T (TNNT2) pre-mRNA exon inclusion in muscle. Regulates the TNNT2 exon 5 inclusion through competitio…	0	2.26219e+07	3.25221e+07	1.99998e+07	3.06221e+07	2.98931e+07	3.17299e+07	5.02781e+07	5.13543e+07	4.2092e+07	7.23476e+07	4.83504e+07	3.49007e+07	0.295815	0.671954	0.935578	2.04945	1.0501	1.08724	11	11	9	10	11	15	13	16	13	13	13	13
Neurexin-3 OS=Homo sapiens OX=9606 GN=NRXN3 PE=1 SV=4	NRXN3	Q9Y4C0	180604	Membrane {ECO:0000305}; Single-pass type I membrane protein {ECO:0000305}.	Neuronal cell surface protein that may be involved in cell recognition and cell adhesion. May mediate intracellular signaling.	TRANSMEM 1569..1589; /note="Helical"; /evidence="ECO:0000255"	591907	889044	626955	1.03637e+06	1.74808e+06	920138	1.35191e+06	1.52606e+06	1.15095e+06	2.56507e+06	1.16099e+06	977278	0.813504	0.902073	0.934584	1.95518	1.15788	0.782119	2	0	0	0	0	0	0	0	0	0	0	0
ATP-dependent Clp protease ATP-binding subunit clpX-like, mitochondrial OS=Homo sapiens OX=9606 GN=CLPX PE=1 SV=2	CLPX	O76031	69224.7	Mitochondrion. Mitochondrion matrix, mitochondrion nucleoid.	ATP-dependent specificity component of the Clp protease complex. Hydrolyzes ATP (PubMed:28874591). Targets specific substrates for degradation by the Clp complex (PubMed:11923310, PubMed:22710082). Can perform chaperone functions in the absence of CLPP. Enhances the DNA-binding activity of TFAM and is required for maintaining a normal mitochondrial nucleoid structure (PubMed:22841477). ATP-depend…	0	4.01322e+06	4.71803e+06	4.88724e+06	8.35619e+06	6.32568e+06	1.39036e+07	8.83074e+06	5.95534e+06	1.12173e+07	5.9243e+06	3.23669e+06	3.20904e+06	1.06971	1.02718	0.933132	1.2546	-0.138716	0.167053	2	0	0	4	4	6	0	3	5	0	2	2
Platelet-activating factor acetylhydrolase IB subunit beta OS=Homo sapiens OX=9606 GN=PAFAH1B1 PE=1 SV=2	PAFAH1B1	P43034	46637.4	Cytoplasm, cytoskeleton. Cytoplasm, cytoskeleton, microtubule organizing center, centrosome {ECO:0000269|PubMed:14654843}. Cytoplasm, cytoskeleton, spindle {ECO:0000255|HAMAP-Rule:MF_03141}. Nucleus membrane {ECO:0000255|HAMAP-Rule:MF_03141}. Note=Redistributes to axons during neuronal development. Also localizes to the microtubules of the manchette in elongating spermatids and to the meiotic spi…	Required for proper activation of Rho GTPases and actin polymerization at the leading edge of locomoting cerebellar neurons and postmigratory hippocampal neurons in response to calcium influx triggered via NMDA receptors. Non-catalytic subunit of an acetylhydrolase complex which inactivates platelet-activating factor (PAF) by removing the acetyl group at the SN-2 position (By similarity). Positiv…	0	3.05143e+06	4.10512e+06	2.74978e+06	3.50365e+06	5.68041e+06	4.9111e+06	5.4882e+06	4.71358e+06	8.69527e+06	4.78983e+06	4.52132e+06	4.59093e+06	0.508778	0.855838	0.931739	1.09557	0.48888	1.47514	0	0	2	4	4	4	0	0	5	0	0	3
14-3-3 protein zeta/delta OS=Homo sapiens OX=9606 GN=YWHAZ PE=1 SV=1	YWHAZ	P63104	27745.9	Cytoplasm {ECO:0000269|PubMed:17081065}. Melanosome {ECO:0000269|PubMed:17081065}. Note=Located to stage I to stage IV melanosomes.	Adapter protein implicated in the regulation of a large spectrum of both general and specialized signaling pathways. Binds to a large number of partners, usually by recognition of a phosphoserine or phosphothreonine motif. Binding generally results in the modulation of the activity of the binding partner. Induces ARHGEF7 activity on RAC1 as well as lamellipodia and membrane ruffle formation (PubM…	0	3.66522e+06	1.56552e+07	9.08371e+06	1.67713e+07	9.3166e+06	9.59719e+06	2.35721e+07	1.50299e+07	1.49985e+07	2.35653e+07	1.60713e+07	1.51587e+07	0.32922	0.223597	0.916149	0.870624	0.947952	0.941252	3	5	6	9	6	5	6	0	6	3	5	5
Exocyst complex component 4 OS=Homo sapiens OX=9606 GN=EXOC4 PE=1 SV=1	EXOC4	Q96A65	110502	Midbody, Midbody ring {ECO:0000269|PubMed:16213214}. Cell projection {ECO:0000250|UniProtKB:Q62824}. Note=Colocalizes with CNTRL/centriolin at the midbody ring (PubMed:16213214). Localizes at the leading edge of migrating cells (By similarity). {ECO:0000250|UniProtKB:Q62824, ECO:0000269|PubMed:16213214}.	Component of the exocyst complex involved in the docking of exocytic vesicles with fusion sites on the plasma membrane. {ECO:0000250}.	0	862169	1.35968e+06	673860	1.76421e+06	1.23608e+06	1.33443e+06	1.73056e+06	2.00411e+06	1.71878e+06	1.55398e+06	1.37104e+06	1.46913e+06	0.582018	0.853835	0.913249	1.71605	0.601665	1.11163	3	0	0	0	0	0	0	0	0	0	0	0
Probable ATP-dependent RNA helicase DDX46 OS=Homo sapiens OX=9606 GN=DDX46 PE=1 SV=2	DDX46	Q7L014	117366	Nucleus speckle {ECO:0000269|PubMed:12234937}. Nucleus, Cajal body {ECO:0000269|PubMed:12234937}. Membrane {ECO:0000305}; Lipid-anchor {ECO:0000305}. Note=Present in Cajal bodies (CBs) and nuclear speckles.	Plays an essential role in splicing, either prior to, or during splicing A complex formation. {ECO:0000269|PubMed:12234937}.	0	3.13779e+07	2.58628e+07	4.3325e+07	2.95568e+07	4.3097e+07	2.55478e+07	45283638	8.49911e+07	5.88198e+07	5.62412e+07	5.46315e+07	7.45089e+07	-0.0343212	0.0360668	0.910969	1.08875	0.882359	1.58371	12	14	22	16	19	15	17	21	23	16	19	25
Glycogen phosphorylase, brain form OS=Homo sapiens OX=9606 GN=PYGB PE=1 SV=5	PYGB	P11216	96698.3	0	Glycogen phosphorylase that regulates glycogen mobilization (PubMed:27402852). Phosphorylase is an important allosteric enzyme in carbohydrate metabolism (PubMed:3346228). Enzymes from different sources differ in their regulatory mechanisms and in their natural substrates (PubMed:3346228). However, all known phosphorylases share catalytic and structural properties (PubMed:3346228). {ECO:0000269|P…	0	2.72691e+06	2.37708e+06	1.90894e+06	8.18925e+06	3.41329e+06	8.08678e+06	4.49625e+06	3.28227e+06	5.32079e+06	5.25442e+06	4.54395e+06	3.92081e+06	1.48932	1.24547	0.901399	1.47509	0.968104	2.10773	0	0	2	4	0	4	0	0	3	0	0	0
AFG3-like protein 2 OS=Homo sapiens OX=9606 GN=AFG3L2 PE=1 SV=2	AFG3L2	Q9Y4W6	88586.8	Mitochondrion {ECO:0000269|PubMed:10395799, ECO:0000269|PubMed:22354088}. Mitochondrion inner membrane {ECO:0000250|UniProtKB:Q8JZQ2}; Multi-pass membrane protein {ECO:0000255}.	ATP-dependent protease which is essential for axonal and neuron development. In neurons, mediates degradation of SMDT1/EMRE before its assembly with the uniporter complex, limiting the availability of SMDT1/EMRE for MCU assembly and promoting efficient assembly of gatekeeper subunits with MCU (PubMed:27642048). Required for the maturation of paraplegin (SPG7) after its cleavage by mitochondrial-p…	TRANSMEM 143..163; /note="Helical"; /evidence="ECO:0000255"; TRANSMEM 251..271; /note="Helical"; /evidence="ECO:0000255"	1.20542e+07	1.01836e+07	1.03996e+07	9.70337e+06	1.47158e+07	1.14896e+07	2.02442e+07	2.5051e+07	1.55796e+07	8.44817e+06	9.58229e+06	7.74336e+06	0.137813	0.277077	0.899321	1.55006	-0.340618	1.34175	7	6	5	5	9	8	10	10	9	3	3	4
AP-2 complex subunit beta OS=Homo sapiens OX=9606 GN=AP2B1 PE=1 SV=1	AP2B1	P63010	104555	Cell membrane {ECO:0000269|PubMed:14530274}. Membrane, coated pit {ECO:0000269|PubMed:14530274}; Peripheral membrane protein {ECO:0000269|PubMed:14530274}; Cytoplasmic side {ECO:0000269|PubMed:14530274}. Note=AP-2 appears to be excluded from internalizing CCVs and to disengage from sites of endocytosis seconds before internalization of the nascent CCV.	Component of the adaptor protein complex 2 (AP-2). Adaptor protein complexes function in protein transport via transport vesicles in different membrane traffic pathways. Adaptor protein complexes are vesicle coat components and appear to be involved in cargo selection and vesicle formation. AP-2 is involved in clathrin-dependent endocytosis in which cargo proteins are incorporated into vesicles s…	0	2.07309e+06	2.54803e+06	2.55728e+06	5.24966e+06	2.94405e+06	4.39413e+06	5.75883e+06	4.40609e+06	3.11192e+06	4.76458e+06	3.65754e+06	4.15345e+06	0.810295	1.22472	0.887178	1.22325	0.80889	2.1339	2	0	0	5	2	3	3	0	3	0	0	0
Bromodomain-containing protein 4 OS=Homo sapiens OX=9606 GN=BRD4 PE=1 SV=2	BRD4	O60885	152217	Nucleus {ECO:0000269|PubMed:16109376}. Chromosome {ECO:0000269|PubMed:16109376, ECO:0000269|PubMed:21890894}. Note=Associates with acetylated chromatin (PubMed:21890894, PubMed:16109376). Released from chromatin upon deacetylation of histones that can be triggered by different signals such as activation of the JNK pathway or nocodazole treatment (PubMed:21890894, PubMed:16109376). Preferentially …	Chromatin reader protein that recognizes and binds acetylated histones and plays a key role in transmission of epigenetic memory across cell divisions and transcription regulation. Remains associated with acetylated chromatin throughout the entire cell cycle and provides epigenetic memory for postmitotic G1 gene transcription by preserving acetylated chromatin status and maintaining high-order ch…	0	1.24546e+06	1.37765e+06	2.352e+06	2.46298e+06	1.74369e+06	2.31852e+06	3.42864e+06	2.61084e+06	3.16148e+06	2.75511e+06	3.52501e+06	3.62729e+06	0.391291	0.555337	0.887056	1.53314	0.99378	1.68098	0	0	0	2	0	0	0	0	0	0	0	0
Torsin-1A-interacting protein 1 OS=Homo sapiens OX=9606 GN=TOR1AIP1 PE=1 SV=2	TOR1AIP1	Q5JTV8	66248.5	Nucleus inner membrane {ECO:0000269|PubMed:12061773, ECO:0000269|PubMed:24275647}; Single-pass membrane protein {ECO:0000269|PubMed:12061773, ECO:0000269|PubMed:24275647}.	Required for nuclear membrane integrity. Induces TOR1A and TOR1B ATPase activity and is required for their location on the nuclear membrane. Binds to A- and B-type lamins. Possible role in membrane attachment and assembly of the nuclear lamina. {ECO:0000269|PubMed:23569223}.	TRANSMEM 339..355; /note="Helical"; /evidence="ECO:0000255"	778905	887714	578117	609746	767483	733339	2.16984e+06	1.03244e+06	948895	1.09363e+06	781248	516899	-0.088914	0.164126	0.886972	0.719141	0.0915375	0.092097	2	2	2	0	2	0	2	0	0	0	0	2
DnaJ homolog subfamily A member 3, mitochondrial OS=Homo sapiens OX=9606 GN=DNAJA3 PE=1 SV=2	DNAJA3	Q96EY1	52489.3	Mitochondrion matrix. Cytoplasm, cytosol {ECO:0000250}. Cell junction, synapse, postsynaptic cell membrane {ECO:0000250}; Peripheral membrane protein {ECO:0000250}. Note=Recruited to the postsynaptic cell membrane of the neuromuscular junction through interaction with MUSK. {ECO:0000250}.	Modulates apoptotic signal transduction or effector structures within the mitochondrial matrix. Affect cytochrome C release from the mitochondria and caspase 3 activation, but not caspase 8 activation. Isoform 1 increases apoptosis triggered by both TNF and the DNA-damaging agent mytomycin C; in sharp contrast, isoform 2 suppresses apoptosis. Can modulate IFN-gamma-mediated transcriptional activi…	0	2.73657e+06	6.0919e+06	5.25705e+06	4.68722e+06	2.77767e+06	6.60851e+06	9.7728e+06	9.9178e+06	6.231e+06	7.56729e+06	6.70222e+06	4.83571e+06	-0.00124187	0.000880075	0.879942	1.18017	0.439754	0.577272	2	3	3	2	2	4	5	5	5	0	3	3
GrpE protein homolog 1, mitochondrial OS=Homo sapiens OX=9606 GN=GRPEL1 PE=1 SV=2	GRPEL1	Q9HAV7	24279.2	Mitochondrion matrix {ECO:0000269|PubMed:11311562}.	Essential component of the PAM complex, a complex required for the translocation of transit peptide-containing proteins from the inner membrane into the mitochondrial matrix in an ATP-dependent manner (By similarity). Seems to control the nucleotide-dependent binding of mitochondrial HSP70 to substrate proteins (PubMed:11311562). {ECO:0000250|UniProtKB:P38523, ECO:0000269|PubMed:11311562}.	0	1.19891e+06	1.09666e+06	1.53183e+06	1.27547e+06	1.51296e+06	1.23092e+06	2.73275e+06	2.34251e+06	1.96007e+06	3.59245e+06	1.97215e+06	1.68959e+06	0.0705966	0.151193	0.878256	1.83906	0.922449	0.875808	2	0	0	2	0	2	2	3	0	2	0	2
Methylcrotonoyl-CoA carboxylase beta chain, mitochondrial OS=Homo sapiens OX=9606 GN=MCCC2 PE=1 SV=1	MCCC2	Q9HCC0	61334.7	Mitochondrion matrix {ECO:0000269|PubMed:11170888, ECO:0000269|PubMed:16023992}.	Carboxyltransferase subunit of the 3-methylcrotonyl-CoA carboxylase, an enzyme that catalyzes the conversion of 3-methylcrotonyl-CoA to 3-methylglutaconyl-CoA, a critical step for leucine and isovaleric acid catabolism. {ECO:0000269|PubMed:17360195}.	0	1.22794e+07	1.32662e+07	1.48008e+07	1.49427e+07	1.69115e+07	2.47627e+07	2.813e+07	1.7803e+07	2.71948e+07	2.32392e+07	1.34924e+07	2.10692e+07	0.488794	0.812843	0.857983	1.4971	0.518651	0.890895	10	10	10	9	11	12	11	7	13	8	6	11
Regulator of chromosome condensation OS=Homo sapiens OX=9606 GN=RCC1 PE=1 SV=1	RCC1	P18754	44967.8	Nucleus {ECO:0000269|PubMed:12194828, ECO:0000269|PubMed:16820410, ECO:0000269|PubMed:17435751, ECO:0000269|PubMed:2236072}. Chromosome {ECO:0000269|PubMed:12194828, ECO:0000269|PubMed:17435751, ECO:0000269|PubMed:18762580, ECO:0000269|PubMed:20668449}. Cytoplasm {ECO:0000269|PubMed:12194828, ECO:0000269|PubMed:17435751, ECO:0000269|PubMed:20668449}. Note=Predominantly nuclear in interphase cells…	Guanine-nucleotide releasing factor that promotes the exchange of Ran-bound GDP by GTP, and thereby plays an important role in RAN-mediated functions in nuclear import and mitosis (PubMed:1944575, PubMed:17435751, PubMed:20668449, PubMed:22215983, PubMed:11336674). Contributes to the generation of high levels of chromosome-associated, GTP-bound RAN, which is important for mitotic spindle assembly…	0	6.13836e+06	4.08909e+06	4.0176e+06	9.84284e+06	1.04008e+07	7.77023e+06	6.29272e+06	6.66758e+06	1.26044e+07	8.79993e+06	9.76238e+06	5.31416e+06	0.975683	1.90811	0.843695	0.808317	0.745129	0.990635	4	2	3	4	5	4	0	0	5	0	0	0
Surfeit locus protein 4 OS=Homo sapiens OX=9606 GN=SURF4 PE=1 SV=3	SURF4	O15260	30395.4	Endoplasmic reticulum membrane {ECO:0000269|PubMed:15308636, ECO:0000269|PubMed:18287528}; Multi-pass membrane protein {ECO:0000255}. Endoplasmic reticulum-Golgi intermediate compartment membrane {ECO:0000269|PubMed:18287528}; Multi-pass membrane protein {ECO:0000255}. Golgi apparatus membrane {ECO:0000269|PubMed:18287528}; Multi-pass membrane protein {ECO:0000255}. Note=Cycles between the endopl…	May play a role in the maintenance of the architecture of the endoplasmic reticulum-Golgi intermediate compartment and of the Golgi. {ECO:0000269|PubMed:18287528}.	TRANSMEM 64..84; /note="Helical"; /evidence="ECO:0000255"; TRANSMEM 92..112; /note="Helical"; /evidence="ECO:0000255"; TRANSMEM 179..199; /note="Helical"; /evidence="ECO:0000255"; TRANSMEM 203..223; /note="Helical"; /evidence="ECO:0000255"; TRANSMEM 239..259; /note="Helical"; /evidence="ECO:0000255"	2.26008e+06	2.79711e+06	2.59969e+06	5.44954e+06	3.7801e+06	3.53536e+06	4.33923e+06	4.88224e+06	4.46298e+06	3.80795e+06	4.22758e+06	2.61936e+06	0.737366	1.28455	0.83771	3.04488	0.476687	0.921692	0	0	0	2	0	2	0	0	0	0	0	0
Nucleolar GTP-binding protein 1 OS=Homo sapiens OX=9606 GN=GTPBP4 PE=1 SV=3	GTPBP4	Q9BZE4	73967.3	Nucleus, nucleolus {ECO:0000269|PubMed:11316846, ECO:0000269|PubMed:12429849, ECO:0000269|Ref.8}.	Involved in the biogenesis of the 60S ribosomal subunit. {ECO:0000250}.	0	2.98164e+06	4.47326e+06	4.956e+06	4.71989e+06	1.06305e+07	3.49746e+06	5.615e+06	7.77863e+06	8.56818e+06	3.95166e+06	5.16771e+06	5.93901e+06	0.602789	0.397758	0.823389	1.39507	0.278958	0.459369	2	0	0	0	4	2	0	0	4	0	0	0
DDB1- and CUL4-associated factor 7 OS=Homo sapiens OX=9606 GN=DCAF7 PE=1 SV=1	DCAF7	P61962	38926.3	Cytoplasm. Nucleus. Note=Overexpression of DIAHP1 or active RHOA causes translocation from the nucleus to cytoplasm.	Involved in craniofacial development. Acts upstream of the EDN1 pathway and is required for formation of the upper jaw equivalent, the palatoquadrate. The activity required for EDN1 pathway function differs between the first and second arches (By similarity). Associates with DIAPH1 and controls GLI1 transcriptional activity. Could be involved in normal and disease skin development. May function a…	0	1.61075e+06	1.702e+06	1.49885e+06	2.17967e+06	4.17674e+06	2.9844e+06	3.52616e+06	2.89239e+06	2.04944e+06	4.12544e+06	3.35842e+06	1.27992e+06	0.957033	1.21658	0.815507	1.32166	0.86504	0.705614	0	0	0	0	0	2	0	0	0	0	0	0
Putative RNA polymerase II subunit B1 CTD phosphatase RPAP2 OS=Homo sapiens OX=9606 GN=RPAP2 PE=1 SV=1	RPAP2	Q8IXW5	69510.8	Cytoplasm {ECO:0000269|PubMed:22137580}. Nucleus {ECO:0000269|PubMed:22137580}. Note=Shuttles between the cytoplasm and the nucleus in a CRM1-dependent manner.	Protein phosphatase that displays CTD phosphatase activity and regulates transcription of snRNA genes. Recognizes and binds phosphorylated 'Ser-7' of the C-terminal heptapeptide repeat domain (CTD) of the largest RNA polymerase II subunit POLR2A, and mediates dephosphorylation of 'Ser-5' of the CTD, thereby promoting transcription of snRNA genes. {ECO:0000269|PubMed:17643375, ECO:0000269|PubMed:2…	0	434190	568128	150612	468918	579993	431820	639551	462983	904672	1.15511e+06	455872	1.13999e+06	0.361005	0.346051	0.799884	0.733841	1.25464	0.953846	0	0	2	0	0	0	0	0	0	0	0	0
Mannosyl-oligosaccharide glucosidase OS=Homo sapiens OX=9606 GN=MOGS PE=1 SV=5	MOGS	Q13724	91919.1	Endoplasmic reticulum membrane; Single-pass type II membrane protein.	Cleaves the distal alpha 1,2-linked glucose residue from the Glc(3)Man(9)GlcNAc(2) oligosaccharide precursor in a highly specific manner.	TRANSMEM 39..59; /note="Helical; Signal-anchor for type II membrane protein"; /evidence="ECO:0000255"	3.53951e+06	3.07435e+06	1.53934e+06	1.58514e+06	7.22e+06	1.0671e+07	4.40885e+06	3.45747e+06	6.32054e+06	3.94613e+06	4.21475e+06	6.30941e+06	1.25627	0.625268	0.799116	0.905653	0.827655	1.02902	4	4	2	3	5	5	0	3	8	0	0	6
U4/U6.U5 tri-snRNP-associated protein 1 OS=Homo sapiens OX=9606 GN=SART1 PE=1 SV=1	SART1	O43290	90257.1	Nucleus {ECO:0000269|PubMed:11350945, ECO:0000269|PubMed:9449708}. Note=Found in the nucleus of mitogen-activated peripheral blood mononuclear cells (PBMCs), tumor cells, or normal cell lines, but not in normal tissues except testis and fetal liver or in unstimulated PBMCs, suggesting preferential expression in proliferating cells.	Plays a role in mRNA splicing as a component of the U4/U6-U5 tri-snRNP, one of the building blocks of the spliceosome. May also bind to DNA. {ECO:0000269|PubMed:11350945}.	0	1.11775e+06	1.27138e+06	2.24518e+06	2.2648e+06	2.04804e+06	2.81275e+06	2.10401e+06	3.0564e+06	2.85968e+06	5.4741e+06	2.29502e+06	3.39963e+06	0.620657	0.923824	0.791266	1.16122	1.26904	1.02629	2	3	3	3	3	3	3	3	4	3	2	3
[Pyruvate dehydrogenase (acetyl-transferring)] kinase isozyme 1, mitochondrial OS=Homo sapiens OX=9606 GN=PDK1 PE=1 SV=1	PDK1	Q15118	49245.8	Mitochondrion matrix {ECO:0000269|PubMed:22195962}.	Kinase that plays a key role in regulation of glucose and fatty acid metabolism and homeostasis via phosphorylation of the pyruvate dehydrogenase subunits PDHA1 and PDHA2. This inhibits pyruvate dehydrogenase activity, and thereby regulates metabolite flux through the tricarboxylic acid cycle, down-regulates aerobic respiration and inhibits the formation of acetyl-coenzyme A from pyruvate. Plays …	0	2.13694e+06	2.40544e+06	1.72868e+06	4.67892e+06	2.83707e+06	2.90976e+06	2.54846e+06	3.57323e+06	4.72795e+06	4.36796e+06	4.96939e+06	3.91632e+06	0.733371	1.02636	0.790867	1.0879	1.07961	2.51729	0	0	2	3	0	0	0	0	0	0	2	2
Replication factor C subunit 3 OS=Homo sapiens OX=9606 GN=RFC3 PE=1 SV=2	RFC3	P40938	40556.8	Nucleus {ECO:0000305}.	The elongation of primed DNA templates by DNA polymerase delta and epsilon requires the action of the accessory proteins proliferating cell nuclear antigen (PCNA) and activator 1.	0	1.7346e+06	1.01531e+06	1.75675e+06	1.88155e+06	1.11447e+06	1.98649e+06	4.54475e+06	1.71247e+06	1.4794e+06	984084	1.79666e+06	1.2337e+06	0.144815	0.162376	0.779646	0.457719	-0.166855	0.182699	3	2	3	0	2	2	4	0	2	2	3	0
MICOS complex subunit MIC19 OS=Homo sapiens OX=9606 GN=CHCHD3 PE=1 SV=1	CHCHD3	Q9NX63	26152.5	Mitochondrion inner membrane {ECO:0000250|UniProtKB:Q9CRB9}; Lipid-anchor {ECO:0000305}; Intermembrane side {ECO:0000250|UniProtKB:Q9CRB9}. Cytoplasm {ECO:0000269|PubMed:22567091}. Nucleus {ECO:0000269|PubMed:22567091}. Mitochondrion {ECO:0000269|PubMed:25781180, ECO:0000269|PubMed:25997101}.	Component of the MICOS complex, a large protein complex of the mitochondrial inner membrane that plays crucial roles in the maintenance of crista junctions, inner membrane architecture, and formation of contact sites to the outer membrane. Has also been shown to function as a transcription factor which binds to the BAG1 promoter and represses BAG1 transcription. Plays an important role in the mai…	0	1.22035e+06	2.11704e+06	2.34441e+06	3.12956e+06	2.23045e+06	2.90555e+06	3.10558e+06	3.32134e+06	3.31928e+06	4.20889e+06	2.91353e+06	2.68961e+06	0.540764	0.921162	0.778492	1.7431	0.788204	1.10707	2	0	0	0	0	0	0	0	0	0	0	0
Alpha-aminoadipic semialdehyde dehydrogenase OS=Homo sapiens OX=9606 GN=ALDH7A1 PE=1 SV=5	ALDH7A1	P49419	58487.6	Cytoplasm, cytosol {ECO:0000269|PubMed:20207735}. Nucleus {ECO:0000269|PubMed:20207735}.; [Isoform 1]: Mitochondrion {ECO:0000269|PubMed:20207735}.	Multifunctional enzyme mediating important protective effects. Metabolizes betaine aldehyde to betaine, an important cellular osmolyte and methyl donor. Protects cells from oxidative stress by metabolizing a number of lipid peroxidation-derived aldehydes. Involved in lysine catabolism. {ECO:0000269|PubMed:16491085, ECO:0000269|PubMed:20207735}.	0	7.18354e+06	9.03603e+06	9.38912e+06	6.64056e+06	9.04517e+06	1.09504e+07	1.5866e+07	1.85752e+07	9.37826e+06	1.51883e+07	9.34607e+06	3.87328e+06	0.0567503	0.0853695	0.774936	1.01271	0.149644	0.100342	5	4	6	3	5	5	5	7	4	4	3	2
Haloacid dehalogenase-like hydrolase domain-containing 5 OS=Homo sapiens OX=9606 GN=HDHD5 PE=1 SV=1	HDHD5	Q9BXW7	46321.6	0	0	0	9.7653e+06	7.49707e+06	6.73016e+06	7.99749e+06	1.35604e+07	1.29592e+07	1.34454e+07	1.61758e+07	1.12507e+07	8.91524e+06	9.73921e+06	8.76929e+06	0.524728	0.818754	0.768528	1.5349	0.19284	0.523859	5	5	6	5	9	8	6	6	5	0	3	4
Myosin-9 OS=Homo sapiens OX=9606 GN=MYH9 PE=1 SV=4	MYH9	P35579	226538	Cytoplasm, cytoskeleton {ECO:0000269|PubMed:22693546}. Cytoplasm, cell cortex {ECO:0000250|UniProtKB:Q8VDD5}. Note=Colocalizes with actin filaments at lamellipodia margins and at the leading edge of migrating cells (PubMed:20052411). In retinal pigment epithelial cells, predominantly localized to stress fiber-like structures with some localization to cytoplasmic puncta (PubMed:27331610). {ECO:000…	Cellular myosin that appears to play a role in cytokinesis, cell shape, and specialized functions such as secretion and capping (By similarity). During cell spreading, plays an important role in cytoskeleton reorganization, focal contacts formation (in the margins but not the central part of spreading cells), and lamellipodial retraction; this function is mechanically antagonized by MYH10 (PubMed…	0	1.23386e+07	1.12666e+07	2.42066e+07	4.91167e+07	3.97518e+07	3.12363e+07	1.61311e+07	1.21687e+07	5.30638e+07	1.32318e+07	7.4991e+06	4.5666e+07	1.32886	1.65786	0.767018	0.338106	0.47375	0.188198	10	8	22	28	30	21	0	0	32	0	6	24
NAD-dependent protein deacetylase sirtuin-1 OS=Homo sapiens OX=9606 GN=SIRT1 PE=1 SV=2	SIRT1	Q96EB6	81682.6	Nucleus, PML body {ECO:0000269|PubMed:12006491}. Cytoplasm {ECO:0000269|PubMed:20027304}. Nucleus {ECO:0000269|PubMed:11672523, ECO:0000269|PubMed:15469825, ECO:0000269|PubMed:16079181, ECO:0000269|PubMed:19934257, ECO:0000269|PubMed:20027304, ECO:0000269|PubMed:20167603, ECO:0000269|PubMed:20955178}. Note=Recruited to the nuclear bodies via its interaction with PML (PubMed:12006491). Colocalized…	NAD-dependent protein deacetylase that links transcriptional regulation directly to intracellular energetics and participates in the coordination of several separated cellular functions such as cell cycle, response to DNA damage, metabolism, apoptosis and autophagy (PubMed:11672523, PubMed:12006491, PubMed:14976264, PubMed:14980222, PubMed:15126506, PubMed:15152190, PubMed:15205477, PubMed:154698…	0	1.16172e+06	883115	344887	687880	1.11221e+06	692314	1.58124e+06	1.03352e+06	1.44809e+06	1.91679e+06	1.36525e+06	2.29905e+06	0.0606938	0.0419398	0.765646	0.893568	1.2237	1.37268	0	0	2	0	0	0	0	0	0	0	0	2
F-actin-capping protein subunit beta OS=Homo sapiens OX=9606 GN=CAPZB PE=1 SV=4	CAPZB	P47756	31351.6	Cytoplasm, cytoskeleton {ECO:0000250}. Cytoplasm, myofibril, sarcomere {ECO:0000250}.	F-actin-capping proteins bind in a Ca(2+)-independent manner to the fast growing ends of actin filaments (barbed end) thereby blocking the exchange of subunits at these ends. Unlike other capping proteins (such as gelsolin and severin), these proteins do not sever actin filaments. Plays a role in the regulation of cell morphology and cytoskeletal organization. {ECO:0000269|PubMed:21834987}.	0	4.13034e+06	2.93431e+06	2.44474e+06	8.73132e+06	3.57633e+06	5.78281e+06	4.65228e+06	3.40708e+06	8.02326e+06	5.56415e+06	9.88164e+06	7.72174e+06	0.927804	0.843106	0.758078	0.678671	1.28468	1.56004	2	2	2	6	2	2	2	0	4	2	3	4
DnaJ homolog subfamily A member 1 OS=Homo sapiens OX=9606 GN=DNAJA1 PE=1 SV=2	DNAJA1	P31689	44868.6	Membrane {ECO:0000305|PubMed:10816573}; Lipid-anchor {ECO:0000305|PubMed:10816573}. Cytoplasm {ECO:0000269|PubMed:10816573}. Microsome {ECO:0000250}. Nucleus {ECO:0000269|PubMed:10816573}. Cytoplasm, perinuclear region {ECO:0000269|PubMed:10816573}. Mitochondrion {ECO:0000250}. Note=Primarily associated with microsomes. A minor proportion is associated with mitochondria (By similarity). Primarily…	Co-chaperone for HSPA8/Hsc70 (PubMed:10816573). Stimulates ATP hydrolysis, but not the folding of unfolded proteins mediated by HSPA1A (in vitro) (PubMed:24318877). Plays a role in protein transport into mitochondria via its role as co-chaperone. Functions as co-chaperone for HSPA1B and negatively regulates the translocation of BAX from the cytosol to mitochondria in response to cellular stress, …	0	6.02317e+06	1.43184e+07	1.73252e+07	1.66848e+07	3.2388e+07	2.00791e+07	1.88071e+07	1.50406e+07	2.96158e+07	3.23729e+07	2.95811e+07	2.31728e+07	0.876478	0.832507	0.752635	0.711147	1.17632	1.66015	5	7	11	9	11	11	9	5	11	7	6	8
Myosin-10 OS=Homo sapiens OX=9606 GN=MYH10 PE=1 SV=3	MYH10	P35580	229005	Cell projection, lamellipodium {ECO:0000269|PubMed:20052411, ECO:0000269|PubMed:22480440}. Note=Colocalizes with MCC at the leading edge of migrating cells.	Cellular myosin that appears to play a role in cytokinesis, cell shape, and specialized functions such as secretion and capping. Involved with LARP6 in the stabilization of type I collagen mRNAs for CO1A1 and CO1A2. During cell spreading, plays an important role in cytoskeleton reorganization, focal contacts formation (in the central part but not the margins of spreading cells), and lamellipodial…	0	1.02442e+07	1.04185e+07	8.79935e+06	14769825	1.87799e+07	1.7274e+07	1.45544e+07	1.47327e+07	2.02804e+07	1.24815e+07	1.34275e+07	1.9458e+07	0.786646	2.2948	0.750534	1.57998	0.622783	1.11079	0	0	10	9	14	12	0	0	13	0	0	7
Glycogen [starch] synthase, muscle OS=Homo sapiens OX=9606 GN=GYS1 PE=1 SV=2	GYS1	P13807	83787.1	0	Transfers the glycosyl residue from UDP-Glc to the non-reducing end of alpha-1,4-glucan.	0	4.21058e+06	2.78635e+06	2.49929e+06	5.97339e+06	8.18834e+06	3.08516e+06	4.05841e+06	3.86696e+06	7.94832e+06	4.40276e+06	5.74357e+06	4.80227e+06	0.860911	0.756841	0.741213	0.674469	0.654584	1.28764	3	2	2	3	4	2	0	2	3	0	0	2
Prohibitin-2 OS=Homo sapiens OX=9606 GN=PHB2 PE=1 SV=2	PHB2	Q99623	33297.6	Mitochondrion inner membrane {ECO:0000269|PubMed:20959514, ECO:0000269|PubMed:28017329}. Cytoplasm {ECO:0000269|PubMed:19496786, ECO:0000269|PubMed:32276428}. Nucleus {ECO:0000269|PubMed:19496786, ECO:0000269|PubMed:20959514}. Cell membrane {ECO:0000269|PubMed:22997079, ECO:0000269|PubMed:24003225}.; [Isoform 1]: Mitochondrion inner membrane {ECO:0000305|PubMed:31522117}.; [Isoform 2]: Mitochondr…	Protein with pleiotropic attributes mediated in a cell-compartment- and tissue-specific manner, which include the plasma membrane-associated cell signaling functions, mitochondrial chaperone, and transcriptional co-regulator of transcription factors and sex steroid hormones in the nucleus. {ECO:0000269|PubMed:10359819, ECO:0000269|PubMed:11302691, ECO:0000269|PubMed:20959514, ECO:0000269|PubMed:2…	0	8.58165e+06	7.11646e+06	3.14651e+06	8.31324e+06	1.15871e+07	1.59013e+07	1.00476e+07	1.21577e+07	9.19315e+06	8.94577e+06	8.04847e+06	5.42996e+06	0.925869	0.969128	0.736542	1.06466	0.250904	0.243331	4	2	2	6	5	6	3	4	5	2	2	2
COUP transcription factor 2 OS=Homo sapiens OX=9606 GN=NR2F2 PE=1 SV=1	NR2F2	P24468	45570.8	Nucleus.	Ligand-activated transcription factor. Activated by high concentrations of 9-cis-retinoic acid and all-trans-retinoic acid, but not by dexamethasone, cortisol or progesterone (in vitro). Regulation of the apolipoprotein A-I gene transcription. Binds to DNA site A. {ECO:0000269|PubMed:18798693, ECO:0000269|PubMed:1899293, ECO:0000269|PubMed:9343308}.	0	527970	3.62858e+06	1.83292e+06	5.49507e+06	5.00566e+06	1.26044e+06	3.00287e+06	2.59705e+06	4.32634e+06	3.66904e+06	2.16305e+06	2.75347e+06	0.973529	0.525097	0.728821	0.560088	0.519482	0.360904	2	3	4	4	5	2	3	2	4	2	2	0
Pyruvate carboxylase, mitochondrial OS=Homo sapiens OX=9606 GN=PC PE=1 SV=2	PC	P11498	129635	Mitochondrion matrix.	Pyruvate carboxylase catalyzes a 2-step reaction, involving the ATP-dependent carboxylation of the covalently attached biotin in the first step and the transfer of the carboxyl group to pyruvate in the second. Catalyzes in a tissue specific manner, the initial reactions of glucose (liver, kidney) and lipid (adipose tissue, liver, brain) synthesis from pyruvate.	0	1.80033e+08	2.31737e+08	1.74761e+08	1.19718e+08	1.49528e+08	1.501e+08	3.61338e+08	3.93129e+08	2.15931e+08	5.34617e+08	335306269	2.33163e+08	-0.484067	1.25969	0.726371	1.04549	0.911267	0.888	54	57	56	42	51	55	62	71	60	65	63	62
Tyrosine--tRNA ligase, mitochondrial OS=Homo sapiens OX=9606 GN=YARS2 PE=1 SV=2	YARS2	Q9Y2Z4	53201	Mitochondrion matrix {ECO:0000269|PubMed:15779907}.	Catalyzes the attachment of tyrosine to tRNA(Tyr) in a two-step reaction: tyrosine is first activated by ATP to form Tyr-AMP and then transferred to the acceptor end of tRNA(Tyr). {ECO:0000269|PubMed:15779907, ECO:0000269|PubMed:17997975}.	0	2.87053e+06	1.1309e+07	1.03764e+07	1.11974e+07	8.11058e+06	8.35454e+06	1.2711e+07	1.54484e+07	1.23041e+07	2.54884e+07	6.34267e+06	1.07411e+07	0.171859	0.133928	0.720551	0.866238	0.793838	0.398376	3	5	7	5	6	5	6	7	8	6	5	6
Alanine--tRNA ligase, mitochondrial OS=Homo sapiens OX=9606 GN=AARS2 PE=1 SV=1	AARS2	Q5JTZ9	107340	Mitochondrion {ECO:0000255|HAMAP-Rule:MF_03133, ECO:0000269|PubMed:21549344}.	Catalyzes the attachment of alanine to tRNA(Ala) in a two-step reaction: alanine is first activated by ATP to form Ala-AMP and then transferred to the acceptor end of tRNA(Ala). Also edits incorrectly charged tRNA(Ala) via its editing domain. {ECO:0000255|HAMAP-Rule:MF_03133}.	0	4.68245e+06	6.92264e+06	5.14925e+06	1.23157e+07	7.96313e+06	8.90522e+06	9.62594e+06	1.18477e+07	6.13022e+06	4.11004e+06	6.41123e+06	6.33859e+06	0.800647	1.30472	0.720333	0.940445	0.00905756	0.0114011	4	5	5	7	5	6	6	7	5	4	4	4
Dolichyl-diphosphooligosaccharide--protein glycosyltransferase subunit STT3B OS=Homo sapiens OX=9606 GN=STT3B PE=1 SV=1	STT3B	Q8TCJ2	93677.7	Endoplasmic reticulum {ECO:0000269|PubMed:12887896}. Endoplasmic reticulum membrane; Multi-pass membrane protein {ECO:0000250|UniProtKB:P39007}.	Catalytic subunit of the oligosaccharyl transferase (OST) complex that catalyzes the initial transfer of a defined glycan (Glc(3)Man(9)GlcNAc(2) in eukaryotes) from the lipid carrier dolichol-pyrophosphate to an asparagine residue within an Asn-X-Ser/Thr consensus motif in nascent polypeptide chains, the first step in protein N-glycosylation. N-glycosylation occurs cotranslationally and the compl…	TRANSMEM 42..86; /note="Helical"; /evidence="ECO:0000250|UniProtKB:P39007"; TRANSMEM 174..192; /note="Helical"; /evidence="ECO:0000250|UniProtKB:P39007"; TRANSMEM 195..212; /note="Helical"; /evidence="ECO:0000250|UniProtKB:P39007"; TRANSMEM 224..243; /note="Helical"; /evidence="ECO:0000250|UniProtKB:P39007"; TRANSMEM 246..260; /note="Helical"; /evidence="ECO:0000250|UniProtKB:P39007"; TRANSMEM 26…	3.63823e+06	2.64732e+06	2.43376e+06	6.48705e+06	3.98598e+06	4.69289e+06	3.91567e+06	3.98773e+06	6.44326e+06	3.39673e+06	4.40062e+06	8.63648e+06	0.798546	1.21398	0.718428	0.965536	0.914383	0.712921	0	2	0	2	0	2	0	0	3	0	0	3
Ras-related protein Rab-11A OS=Homo sapiens OX=9606 GN=RAB11A PE=1 SV=3	RAB11A	P62491,Q15907	24393.9	#N/A	#N/A	#N/A	3.12538e+06	3.77281e+06	1.78874e+06	5.65619e+06	4.65647e+06	4.29778e+06	4.10227e+06	4.00574e+06	6.09113e+06	4.61944e+06	4.13804e+06	7.26486e+06	0.750083	1.30021	0.708886	0.959981	0.883168	1.01183	0	0	2	3	0	0	0	0	0	0	0	3
Glomulin OS=Homo sapiens OX=9606 GN=GLMN PE=1 SV=2	GLMN	Q92990	68212	0	[Isoform 1]: Regulatory component of cullin-RING-based SCF (SKP1-Cullin-F-box protein) E3 ubiquitin-protein ligase complexes (PubMed:22405651, PubMed:22748924). Inhibits E3 ubiquitin ligase activity by binding to RBX1 (via RING domain) and inhibiting its interaction with the E2 ubiquitin-conjugating enzyme CDC34 (PubMed:22405651, PubMed:22748924). Inhibits RBX1-mediated neddylation of CUL1 (PubMe…	0	1.61196e+06	1.92393e+06	1.34362e+06	2.2483e+06	2.98315e+06	1.8209e+06	2.52826e+06	2.7537e+06	2.6788e+06	3.40248e+06	1.85888e+06	3.23784e+06	0.531366	0.891879	0.706167	2.32858	0.800587	1.09662	0	0	2	0	0	0	0	0	0	0	0	0
Nitric oxide-associated protein 1 OS=Homo sapiens OX=9606 GN=NOA1 PE=1 SV=2	NOA1	Q8NC60	78459.4	Mitochondrion inner membrane {ECO:0000269|PubMed:19103604}; Peripheral membrane protein {ECO:0000269|PubMed:19103604}; Matrix side {ECO:0000269|PubMed:19103604}.	Involved in regulation of mitochondrial protein translation and respiration. Plays a role in mitochondria-mediated cell death. May act as a scaffolding protein or stabilizer of respiratory chain supercomplexes. Binds GTP. {ECO:0000269|PubMed:19103604}.	0	954925	1.33703e+06	1.06959e+06	1.482e+06	650432	1.45122e+06	2.14012e+06	2.03386e+06	1.30574e+06	1.0523e+06	1.7233e+06	1.63499e+06	0.0923045	0.0893289	0.70498	1.16247	0.391845	0.662967	2	0	0	0	0	0	0	0	0	0	0	0
Poly(rC)-binding protein 2 OS=Homo sapiens OX=9606 GN=PCBP2 PE=1 SV=1	PCBP2	Q15366	38580.9	Nucleus {ECO:0000269|PubMed:19029303}. Cytoplasm {ECO:0000269|PubMed:19029303}. Note=Loosely bound in the nucleus. May shuttle between the nucleus and the cytoplasm.	Single-stranded nucleic acid binding protein that binds preferentially to oligo dC. Major cellular poly(rC)-binding protein. Binds also poly(rU). Negatively regulates cellular antiviral responses mediated by MAVS signaling (PubMed:19881509). It acts as an adapter between MAVS and the E3 ubiquitin ligase ITCH, therefore triggering MAVS ubiquitination and degradation (PubMed:19881509). {ECO:0000269…	0	4.74443e+07	6.69378e+07	5.46191e+07	5.20499e+07	6.57488e+07	4.29243e+07	1.07432e+08	1.17653e+08	5.00198e+07	1.91599e+08	1.25001e+08	1.43919e+08	-0.0724575	0.114632	0.702951	0.744445	1.44623	2.03552	14	10	13	13	10	11	13	11	12	13	13	15
Elongation factor Ts, mitochondrial OS=Homo sapiens OX=9606 GN=TSFM PE=1 SV=2	TSFM	P43897	35391	Mitochondrion.	Associates with the EF-Tu.GDP complex and induces the exchange of GDP to GTP. It remains bound to the aminoacyl-tRNA.EF-Tu.GTP complex up to the GTP hydrolysis stage on the ribosome. {ECO:0000255|HAMAP-Rule:MF_03135, ECO:0000269|PubMed:27677415}.	0	6.54651e+06	7.65385e+06	4.10559e+06	5.56598e+06	4.31249e+06	1.63529e+07	1.193e+07	9.9962e+06	7.7925e+06	7.16522e+06	8.28942e+06	7.79939e+06	0.518983	0.266415	0.699061	1.1254	0.345169	0.683402	2	3	2	0	2	5	3	4	4	0	2	2
Propionyl-CoA carboxylase beta chain, mitochondrial OS=Homo sapiens OX=9606 GN=PCCB PE=1 SV=3	PCCB	P05166	58216	Mitochondrion matrix {ECO:0000305|PubMed:16023992}.	This is one of the 2 subunits of the biotin-dependent propionyl-CoA carboxylase (PCC), a mitochondrial enzyme involved in the catabolism of odd chain fatty acids, branched-chain amino acids isoleucine, threonine, methionine, and valine and other metabolites (PubMed:6765947, PubMed:15890657). Propionyl-CoA carboxylase catalyzes the carboxylation of propionyl-CoA/propanoyl-CoA to D-methylmalonyl-Co…	0	7.65792e+07	1.11829e+08	6.48896e+07	5.28825e+07	6.6241e+07	8.22602e+07	1.69465e+08	170282208	7.09501e+07	1.94822e+08	1.39572e+08	9.9384e+07	-0.330888	0.452719	0.697239	0.662857	0.776121	0.903888	24	26	20	17	23	30	31	35	27	29	30	30
Mitochondrial proton/calcium exchanger protein OS=Homo sapiens OX=9606 GN=LETM1 PE=1 SV=1	LETM1	O95202	83355.9	Mitochondrion inner membrane {ECO:0000269|PubMed:14706454, ECO:0000269|PubMed:15138253, ECO:0000269|PubMed:18628306, ECO:0000269|PubMed:19797662}; Single-pass membrane protein {ECO:0000269|PubMed:14706454, ECO:0000269|PubMed:15138253, ECO:0000269|PubMed:18628306}.	Mitochondrial proton/calcium antiporter that mediates proton-dependent calcium efflux from mitochondrion (PubMed:19797662). Crucial for the maintenance of mitochondrial tubular networks and for the assembly of the supercomplexes of the respiratory chain (PubMed:18628306). Required for the maintenance of the tubular shape and cristae organization (PubMed:18628306). In contrast to SLC8B1/NCLX, does…	TRANSMEM 209..229; /note="Helical"; /evidence="ECO:0000255"	1.01882e+07	9.92747e+06	6.38326e+06	1.24253e+07	1.28532e+07	1.98491e+07	1.78158e+07	1.84568e+07	6.60401e+06	1.35137e+07	9.74339e+06	9.48386e+06	0.768075	1.08064	0.694255	0.60569	0.305163	0.509283	5	6	3	6	7	8	7	7	3	0	4	0
Integrator complex subunit 4 OS=Homo sapiens OX=9606 GN=INTS4 PE=1 SV=2	INTS4	Q96HW7	108174	Nucleus {ECO:0000269|PubMed:23904267}.	Component of the Integrator (INT) complex, a complex involved in the small nuclear RNAs (snRNA) U1 and U2 transcription and in their 3'-box-dependent processing. The Integrator complex is associated with the C-terminal domain (CTD) of RNA polymerase II largest subunit (POLR2A) and is recruited to the U1 and U2 snRNAs genes (Probable). Mediates recruitment of cytoplasmic dynein to the nuclear enve…	0	1.69264e+06	1.86864e+06	1.29277e+06	1.8284e+06	2.3332e+06	1.93696e+06	2.81106e+06	2.82802e+06	2.20312e+06	4.14596e+06	2.56454e+06	2.46129e+06	0.32928	0.839707	0.692069	1.69295	0.918014	1.18463	2	0	2	0	0	0	0	0	0	0	0	0
Serine/threonine-protein kinase PLK1 OS=Homo sapiens OX=9606 GN=PLK1 PE=1 SV=1	PLK1	P53350	68257.4	Nucleus. Chromosome, centromere, kinetochore. Cytoplasm, cytoskeleton, microtubule organizing center, centrosome {ECO:0000269|PubMed:14654843, ECO:0000269|PubMed:24018379}. Cytoplasm, cytoskeleton, spindle {ECO:0000269|PubMed:18794143, ECO:0000269|PubMed:30715179}. Midbody {ECO:0000269|PubMed:30715179}. Note=localization at the centrosome starts at the G1/S transition (PubMed:24018379). During ea…	Serine/threonine-protein kinase that performs several important functions throughout M phase of the cell cycle, including the regulation of centrosome maturation and spindle assembly, the removal of cohesins from chromosome arms, the inactivation of anaphase-promoting complex/cyclosome (APC/C) inhibitors, and the regulation of mitotic exit and cytokinesis. Polo-like kinase proteins acts by bindin…	0	1.60323e+06	834243	861523	1.19953e+06	1.2085e+06	1.52404e+06	1.66934e+06	1.52495e+06	2.13425e+06	2.31532e+06	2.26401e+06	1.82466e+06	0.253262	0.315578	0.691716	1.0183	0.956945	1.60187	0	2	0	0	0	0	0	0	0	0	0	0
T-complex protein 1 subunit zeta OS=Homo sapiens OX=9606 GN=CCT6A PE=1 SV=3	CCT6A	P40227	58025.3	Cytoplasm {ECO:0000269|PubMed:8034610}.	Component of the chaperonin-containing T-complex (TRiC), a molecular chaperone complex that assists the folding of proteins upon ATP hydrolysis (PubMed:25467444). The TRiC complex mediates the folding of WRAP53/TCAB1, thereby regulating telomere maintenance (PubMed:25467444). The TRiC complex plays a role in the folding of actin and tubulin (Probable). {ECO:0000269|PubMed:25467444, ECO:0000305}.	0	1.31586e+07	8.68321e+06	1.40804e+07	2.46178e+07	1.7692e+07	1.08777e+07	1.81121e+07	1.42671e+07	2.52461e+07	9.65884e+06	1.12605e+07	9.15288e+06	0.566213	0.598593	0.681828	0.933616	-0.256445	0.474013	10	5	7	9	9	7	7	6	9	4	4	7
NEDD8 ultimate buster 1 OS=Homo sapiens OX=9606 GN=NUB1 PE=1 SV=2	NUB1	Q9Y5A7	70540.9	Nucleus {ECO:0000269|PubMed:11259415}. Note=Predominantly nuclear.	Specific down-regulator of the NEDD8 conjugation system. Recruits NEDD8, UBD, and their conjugates to the proteasome for degradation. Isoform 1 promotes the degradation of NEDD8 more efficiently than isoform 2. {ECO:0000269|PubMed:16707496}.	0	306188	371484	275892	513353	457188	372639	523430	495914	508429	694071	806260	371148	0.494251	1.22801	0.680028	2.54688	0.972777	1.07788	2	2	2	0	0	0	0	0	0	0	0	2
Nucleoprotein TPR OS=Homo sapiens OX=9606 GN=TPR PE=1 SV=3	TPR	P12270	267289	Nucleus {ECO:0000269|PubMed:12802065}. Nucleus membrane {ECO:0000269|PubMed:11514627, ECO:0000269|PubMed:11952838, ECO:0000269|PubMed:18794356, ECO:0000269|PubMed:9024684, ECO:0000269|PubMed:9828100, ECO:0000269|PubMed:9864356}; Peripheral membrane protein {ECO:0000269|PubMed:11514627, ECO:0000269|PubMed:9024684, ECO:0000269|PubMed:9828100, ECO:0000269|PubMed:9864356}; Nucleoplasmic side {ECO:000…	Component of the nuclear pore complex (NPC), a complex required for the trafficking across the nuclear envelope. Functions as a scaffolding element in the nuclear phase of the NPC essential for normal nucleocytoplasmic transport of proteins and mRNAs, plays a role in the establishment of nuclear-peripheral chromatin compartmentalization in interphase, and in the mitotic spindle checkpoint signali…	0	3.52381e+06	1.85608e+06	3.93439e+06	3.55417e+06	7.38579e+06	6.8338e+06	4.13368e+06	4.39055e+06	6.38469e+06	4.48099e+06	1.02671e+07	1.77073e+07	0.932233	0.975694	0.67866	0.912736	1.80094	0.929076	0	2	3	0	4	3	0	0	4	3	5	9
2',3'-cyclic-nucleotide 3'-phosphodiesterase OS=Homo sapiens OX=9606 GN=CNP PE=1 SV=2	CNP	P09543	47580.6	Membrane; Lipid-anchor. Melanosome. Note=Firmly bound to membrane structures of brain white matter. Identified by mass spectrometry in melanosome fractions from stage I to stage IV.	May participate in RNA metabolism in the myelinating cell, CNP is the third most abundant protein in central nervous system myelin. {ECO:0000250}.	0	3.66146e+06	7.82011e+06	6.24543e+06	1.84758e+06	6.89612e+06	7.07761e+06	1.0112e+07	1.36752e+07	4.43791e+06	1.01907e+07	7.71971e+06	2.47461e+06	-0.16408	0.109423	0.671031	0.521131	0.201563	0.125886	4	4	5	2	6	4	5	4	4	4	3	2
3-ketoacyl-CoA thiolase, mitochondrial OS=Homo sapiens OX=9606 GN=ACAA2 PE=1 SV=2	ACAA2	P42765	41924.2	Mitochondrion {ECO:0000269|PubMed:18371312}.	In the production of energy from fats, this is one of the enzymes that catalyzes the last step of the mitochondrial beta-oxidation pathway, an aerobic process breaking down fatty acids into acetyl-CoA (Probable). Using free coenzyme A/CoA, catalyzes the thiolytic cleavage of medium- to long-chain unbranched 3-oxoacyl-CoAs into acetyl-CoA and a fatty acyl-CoA shortened by two carbon atoms (Probabl…	0	1.58629e+06	4.53966e+06	1.83314e+06	2.09726e+06	3.93711e+06	4.75575e+06	4.41219e+06	3.38352e+06	4.87563e+06	3.15834e+06	1.20687e+06	3.05568e+06	0.439036	0.313609	0.670894	0.684485	-0.101011	0.0543043	2	3	3	2	5	3	3	0	5	0	2	4
Phosphoglycerate kinase 1 OS=Homo sapiens OX=9606 GN=PGK1 PE=1 SV=3	PGK1	P00558	44615.3	Cytoplasm.	Catalyzes one of the two ATP producing reactions in the glycolytic pathway via the reversible conversion of 1,3-diphosphoglycerate to 3-phosphoglycerate (PubMed:30323285, PubMed:7391028). In addition to its role as a glycolytic enzyme, it seems that PGK-1 acts as a polymerase alpha cofactor protein (primer recognition protein) (PubMed:2324090). May play a role in sperm motility (PubMed:26677959).…	0	1.49562e+07	5.74108e+06	1.06521e+07	2.27045e+07	1.35436e+07	9.85982e+06	8.33452e+06	1.06878e+07	3.08133e+07	9.51932e+06	8.14602e+06	1.46953e+07	0.556579	0.455696	0.668745	0.333753	0.0458058	0.0342584	5	2	5	8	6	5	0	0	8	0	3	6
Spectrin beta chain, non-erythrocytic 1 OS=Homo sapiens OX=9606 GN=SPTBN1 PE=1 SV=2	SPTBN1	Q01082	274613	Cytoplasm, cytoskeleton {ECO:0000250}. Cytoplasm, myofibril, sarcomere, M line {ECO:0000250}. Note=Colocalizes with ANK2 in a distinct intracellular compartment of neonatal cardiomyocytes. {ECO:0000250}.; [Isoform 2]: Cell membrane {ECO:0000250}; Peripheral membrane protein {ECO:0000250}; Cytoplasmic side {ECO:0000250}.	Fodrin, which seems to be involved in secretion, interacts with calmodulin in a calcium-dependent manner and is thus candidate for the calcium-dependent movement of the cytoskeleton at the membrane.	0	601751	651193	1.19841e+06	882887	682445	885667	1.24484e+06	906213	1.73618e+06	1.50071e+06	1.2097e+06	656456	-0.000212361	0.000193329	0.665163	0.710721	0.457825	0.415067	0	0	0	2	2	0	0	0	0	0	0	2
Filamin-B OS=Homo sapiens OX=9606 GN=FLNB PE=1 SV=2	FLNB	O75369	278159	[Isoform 1]: Cytoplasm, cell cortex. Cytoplasm, cytoskeleton. Cytoplasm, cytoskeleton, stress fiber. Cytoplasm, myofibril, sarcomere, Z line. Note=In differentiating myotubes, isoform 1, isoform 2 and isoform 3 are localized diffusely throughout the cytoplasm with regions of enrichment at the longitudinal actin stress fiber. In differentiated tubes, isoform 1 is also detected within the Z-lines.;…	Connects cell membrane constituents to the actin cytoskeleton. May promote orthogonal branching of actin filaments and links actin filaments to membrane glycoproteins. Anchors various transmembrane proteins to the actin cytoskeleton. Interaction with FLNA may allow neuroblast migration from the ventricular zone into the cortical plate. Various interactions and localizations of isoforms affect myo…	0	3.12219e+06	2.50326e+06	5.32742e+06	9.39703e+06	8.57641e+06	8.2099e+06	2.49935e+06	4.86603e+06	9.97701e+06	5.85769e+06	8.05613e+06	9.40716e+06	1.25734	2.26822	0.662994	0.377659	1.09032	1.42801	3	3	4	7	8	7	2	3	8	0	6	7
ATP synthase subunit beta, mitochondrial OS=Homo sapiens OX=9606 GN=ATP5F1B PE=1 SV=3	ATP5F1B	P06576	56560.6	Mitochondrion inner membrane {ECO:0000250|UniProtKB:P00829}; Peripheral membrane protein {ECO:0000250|UniProtKB:P00829}; Matrix side {ECO:0000250|UniProtKB:P00829}.	Mitochondrial membrane ATP synthase (F(1)F(0) ATP synthase or Complex V) produces ATP from ADP in the presence of a proton gradient across the membrane which is generated by electron transport complexes of the respiratory chain. F-type ATPases consist of two structural domains, F(1) - containing the extramembraneous catalytic core, and F(0) - containing the membrane proton channel, linked togethe…	0	7.18479e+07	1.09e+08	6.93502e+07	7.5895e+07	8.59915e+07	1.45946e+08	1.55723e+08	127209820	1.12833e+08	1.47165e+08	1.54971e+08	1.07634e+08	0.299074	0.309226	0.661572	1.26637	0.711742	1.2812	24	27	24	27	31	31	26	27	30	19	25	26
Rho guanine nucleotide exchange factor 2 OS=Homo sapiens OX=9606 GN=ARHGEF2 PE=1 SV=4	ARHGEF2	Q92974	111546	Cytoplasm, cytoskeleton {ECO:0000269|PubMed:11912491, ECO:0000269|PubMed:21887730, ECO:0000269|PubMed:9857026}. Cytoplasm {ECO:0000269|PubMed:15827085, ECO:0000269|PubMed:21887730}. Cell junction, tight junction {ECO:0000269|PubMed:19043560}. Golgi apparatus {ECO:0000269|PubMed:15827085}. Cytoplasm, cytoskeleton, spindle {ECO:0000269|PubMed:17488622}. Cell projection, ruffle membrane {ECO:0000269…	Activates Rho-GTPases by promoting the exchange of GDP for GTP. May be involved in epithelial barrier permeability, cell motility and polarization, dendritic spine morphology, antigen presentation, leukemic cell differentiation, cell cycle regulation, innate immune response, and cancer. Binds Rac-GTPases, but does not seem to promote nucleotide exchange activity toward Rac-GTPases, which was uniq…	0	341272	1.82294e+06	1.22074e+06	3.20861e+06	1.04251e+06	1.16861e+06	1.62434e+06	1.99713e+06	1.70771e+06	2.71945e+06	1.46416e+06	1.59908e+06	0.679087	0.340727	0.65478	0.659881	0.772605	0.612094	2	2	3	3	3	2	0	0	0	0	0	0
40S ribosomal protein S17 OS=Homo sapiens OX=9606 GN=RPS17 PE=1 SV=2	RPS17	P08708	15550.5	0	0	0	3.8182e+06	3.18437e+06	3.12308e+06	2.1759e+06	5.67975e+06	2.0555e+06	5.33255e+06	8.22748e+06	2.36534e+06	3.89943e+06	4.27794e+06	2.59298e+06	-0.0308896	0.0196864	0.653312	0.493968	0.0890502	0.1432	4	3	4	2	4	2	4	4	2	2	0	2
Fumarate hydratase, mitochondrial OS=Homo sapiens OX=9606 GN=FH PE=1 SV=3	FH	P07954	54637.8	[Isoform Mitochondrial]: Mitochondrion {ECO:0000269|PubMed:27037871}.; [Isoform Cytoplasmic]: Cytoplasm, cytosol {ECO:0000269|PubMed:20231875, ECO:0000269|PubMed:22509282, ECO:0000269|PubMed:26237645, ECO:0000269|PubMed:27037871}. Nucleus {ECO:0000269|PubMed:20231875, ECO:0000269|PubMed:26237645}. Chromosome {ECO:0000269|PubMed:26237645}. Note=Translocates to the nucleus in response to DNA damage…	Catalyzes the reversible stereospecific interconversion of fumarate to L-malate (PubMed:30761759). Experiments in other species have demonstrated that specific isoforms of this protein act in defined pathways and favor one direction over the other (Probable). {ECO:0000269|PubMed:30761759, ECO:0000305}.; [Isoform Mitochondrial]: Catalyzes the hydration of fumarate to L-malate in the tricarboxylic …	0	5.84183e+06	1.16594e+07	6.22541e+06	1.02758e+07	1.33154e+07	1.19376e+07	1.43017e+07	1.30973e+07	9.82267e+06	7.01384e+06	1.39162e+07	6.76678e+06	0.582483	0.883736	0.649638	0.910419	0.223214	0.166078	3	4	4	4	6	4	4	4	4	2	4	3
Triosephosphate isomerase OS=Homo sapiens OX=9606 GN=TPI1 PE=1 SV=4	TPI1	P60174	26669.1	Cytoplasm {ECO:0000255|PROSITE-ProRule:PRU10127}.	Triosephosphate isomerase is an extremely efficient metabolic enzyme that catalyzes the interconversion between dihydroxyacetone phosphate (DHAP) and D-glyceraldehyde-3-phosphate (G3P) in glycolysis and gluconeogenesis. {ECO:0000269|PubMed:18562316}.; It is also responsible for the non-negligible production of methylglyoxal a reactive cytotoxic side-product that modifies and can alter proteins, D…	0	5.42576e+06	4.07224e+06	1.10213e+07	1.61894e+07	8.81703e+06	8.15216e+06	4.8049e+06	7.61054e+06	1.97681e+07	6.89601e+06	8.75852e+06	1.03077e+07	0.6924	0.559508	0.64934	0.314107	0.339434	0.316767	6	4	5	6	6	4	2	2	7	4	4	5
Survival motor neuron protein OS=Homo sapiens OX=9606 GN=SMN1 PE=1 SV=1	SMN1	Q16637	31849.5	Nucleus, gem {ECO:0000269|PubMed:11283611, ECO:0000269|PubMed:8670859, ECO:0000305|PubMed:12067652}. Nucleus, Cajal body {ECO:0000269|PubMed:11283611, ECO:0000269|PubMed:21072240, ECO:0000305|PubMed:12067652}. Cytoplasm {ECO:0000269|PubMed:11283611, ECO:0000269|PubMed:8670859, ECO:0000305|PubMed:12067652}. Cytoplasmic granule {ECO:0000269|PubMed:14715275}. Perikaryon {ECO:0000269|PubMed:18093976}…	The SMN complex plays a catalyst role in the assembly of small nuclear ribonucleoproteins (snRNPs), the building blocks of the spliceosome. Thereby, plays an important role in the splicing of cellular pre-mRNAs. Most spliceosomal snRNPs contain a common set of Sm proteins SNRPB, SNRPD1, SNRPD2, SNRPD3, SNRPE, SNRPF and SNRPG that assemble in a heptameric protein ring on the Sm site of the small n…	0	3.21445e+06	904128	1.39527e+06	1.88283e+06	1.93565e+06	459147	2.68175e+06	4.2074e+06	1.73917e+06	1.68435e+06	2.40305e+06	2.28854e+06	-0.366248	0.184226	0.646018	0.443505	0.209578	0.144751	4	2	3	2	3	2	4	3	3	0	0	0
Actin, alpha cardiac muscle 1 OS=Homo sapiens OX=9606 GN=ACTC1 PE=1 SV=1	ACTC1	P68032,P68133	42020.1	#N/A	#N/A	#N/A	2.30515e+08	2.12424e+08	1.22313e+08	159540807	3.58176e+08	4.0839e+08	2.86729e+08	3.52153e+08	242373106	3.41213e+08	2.09169e+08	214656563	0.712284	0.655699	0.640665	1.07117	0.436639	0.538375	35	0	32	28	33	37	28	27	33	23	28	28
(S.avidinii)	#VALUE!	Streptavidin	16622	#N/A	#N/A	#N/A	5573316814	7861840422	4739897011	5059783857	5209520806	6382852867	11625706999	10570519636	6088474902	19860934955	11250598417	8547292220	-0.126251	0.189976	0.638062	0.804378	1.12568	0.947465	396	386	391	391	464	451	464	489	435	431	426	434
Phosphoribosylformylglycinamidine synthase OS=Homo sapiens OX=9606 GN=PFAS PE=1 SV=4	PFAS	O15067	144734	Cytoplasm {ECO:0000250}.	Phosphoribosylformylglycinamidine synthase involved in the purines biosynthetic pathway. Catalyzes the ATP-dependent conversion of formylglycinamide ribonucleotide (FGAR) and glutamine to yield formylglycinamidine ribonucleotide (FGAM) and glutamate (By similarity). {ECO:0000250}.	0	1.53029e+06	1.89493e+06	905978	439732	2.43992e+06	2.84395e+06	2.20207e+06	2.40583e+06	2.11543e+06	2.35275e+06	1.77221e+06	3.58934e+06	0.402158	0.227861	0.63441	1.24264	0.832768	0.861508	0	0	2	2	3	2	0	0	4	0	0	4
Keratin, type I cytoskeletal 14 OS=Homo sapiens OX=9606 GN=KRT14 PE=1 SV=4	KRT14	P02533	51562.5	Cytoplasm. Nucleus. Note=Expressed in both as a filamentous pattern.	The nonhelical tail domain is involved in promoting KRT5-KRT14 filaments to self-organize into large bundles and enhances the mechanical properties involved in resilience of keratin intermediate filaments in vitro. {ECO:0000269|PubMed:11724817}.	0	1.89992e+07	7.21756e+06	1.28544e+07	1.79889e+07	1.26735e+07	8.1896e+06	4.0495e+07	1.42711e+07	5.82545e+06	2.86992e+07	8.06352e+07	7.67036e+06	-0.00811879	0.00541094	0.633009	0.26032	1.58239	0.519814	14	7	13	4	10	4	17	8	8	9	23	8
E3 ubiquitin-protein ligase TRIP12 OS=Homo sapiens OX=9606 GN=TRIP12 PE=1 SV=1	TRIP12	Q14669	220438	Nucleus, nucleoplasm {ECO:0000269|PubMed:20208519}.	E3 ubiquitin-protein ligase involved in ubiquitin fusion degradation (UFD) pathway and regulation of DNA repair (PubMed:19028681, PubMed:22884692). Part of the ubiquitin fusion degradation (UFD) pathway, a process that mediates ubiquitination of protein at their N-terminus, regardless of the presence of lysine residues in target proteins (PubMed:19028681). Acts as a key regulator of DNA damage re…	0	762214	1.10446e+06	1.01302e+06	1.34786e+06	1.06114e+06	1.33297e+06	1.47823e+06	1.31983e+06	1.66698e+06	2.14772e+06	1.68864e+06	1.66356e+06	0.377882	0.973097	0.632755	1.67651	0.933492	2.01596	2	0	0	3	0	0	0	0	0	0	0	0
Eukaryotic translation initiation factor 3 subunit H OS=Homo sapiens OX=9606 GN=EIF3H PE=1 SV=1	EIF3H	O15372	39930.6	Cytoplasm {ECO:0000255|HAMAP-Rule:MF_03007}.	Component of the eukaryotic translation initiation factor 3 (eIF-3) complex, which is required for several steps in the initiation of protein synthesis (PubMed:17581632, PubMed:25849773, PubMed:27462815). The eIF-3 complex associates with the 40S ribosome and facilitates the recruitment of eIF-1, eIF-1A, eIF-2:GTP:methionyl-tRNAi and eIF-5 to form the 43S pre-initiation complex (43S PIC). The eIF…	0	1.43784e+06	1.68062e+06	1.17997e+06	1.75217e+06	1.19803e+06	2.14302e+06	1.90307e+06	2.48543e+06	2.26402e+06	1.36327e+06	2.26088e+06	2.16807e+06	0.24477	0.355741	0.630093	1.61171	0.430307	0.711774	0	0	2	0	0	0	0	0	0	0	0	0
Pentatricopeptide repeat domain-containing protein 3, mitochondrial OS=Homo sapiens OX=9606 GN=PTCD3 PE=1 SV=3	PTCD3	Q96EY7	78552.6	Mitochondrion {ECO:0000269|PubMed:19427859, ECO:0000269|PubMed:23908630}.	Mitochondrial RNA-binding protein that has a role in mitochondrial translation. {ECO:0000269|PubMed:19427859}.	0	3.19907e+06	6.19846e+06	1.91678e+06	3.3223e+06	4.23751e+06	2.90374e+06	5.30226e+06	5.50402e+06	6.65599e+06	4.19484e+06	4.13321e+06	6.08741e+06	-0.112775	0.074999	0.626091	0.698777	0.349468	0.294638	0	3	2	0	3	3	3	3	4	2	2	3
Cytoplasmic dynein 2 heavy chain 1 OS=Homo sapiens OX=9606 GN=DYNC2H1 PE=1 SV=4	DYNC2H1	Q8NCM8	492629	Cytoplasm, cytoskeleton, cilium axoneme {ECO:0000250|UniProtKB:Q9JJ79}. Cell membrane {ECO:0000250|UniProtKB:Q45VK7}; Peripheral membrane protein {ECO:0000250|UniProtKB:Q45VK7}. Cytoplasm {ECO:0000250|UniProtKB:Q9JJ79}. Note=Localizes to the apical cytoplasm (By similarity). According to PubMed:8666668, it localizes to Golgi apparatus, cytoplasmic vesicle and endoplasmic reticulum (PubMed:8666668…	May function as a motor for intraflagellar retrograde transport. Functions in cilia biogenesis. May play a role in transport between endoplasmic reticulum and Golgi or organization of the Golgi in cells (By similarity). {ECO:0000250}.	0	1.41204e+06	1.38755e+06	1.19469e+06	1.42167e+06	1.96775e+06	2.15248e+06	2.27771e+06	2.12844e+06	1.75847e+06	2.31482e+06	1.93233e+06	1.53007e+06	0.472442	1.05429	0.626074	1.89188	0.532439	1.18018	0	0	2	0	0	0	0	0	0	0	0	0
Peroxiredoxin-2 OS=Homo sapiens OX=9606 GN=PRDX2 PE=1 SV=5	PRDX2	P32119	21892.4	Cytoplasm {ECO:0000269|PubMed:9497357}.	Thiol-specific peroxidase that catalyzes the reduction of hydrogen peroxide and organic hydroperoxides to water and alcohols, respectively. Plays a role in cell protection against oxidative stress by detoxifying peroxides and as sensor of hydrogen peroxide-mediated signaling events. Might participate in the signaling cascades of growth factors and tumor necrosis factor-alpha by regulating the int…	0	2.319e+07	1.6434e+07	3.32337e+06	1.00867e+07	1.68601e+07	1.53499e+07	2.61802e+07	2.52878e+07	14752135	5.31524e+07	4.58363e+07	2.57156e+07	-0.022023	0.0115753	0.6247	0.490518	1.53787	1.27032	7	5	2	3	4	4	4	4	3	5	4	7
Mitochondrial-processing peptidase subunit beta OS=Homo sapiens OX=9606 GN=PMPCB PE=1 SV=2	PMPCB	O75439	54367.1	Mitochondrion matrix {ECO:0000269|PubMed:22354088}.	Catalytic subunit of the essential mitochondrial processing protease (MPP), which cleaves the mitochondrial sequence off newly imported precursors proteins (PubMed:29576218) (Probable). Preferentially, cleaves after an arginine at position P2 (By similarity). Required for PINK1 turnover by coupling PINK1 mitochondrial import and cleavage, which results in subsequent PINK1 proteolysis (PubMed:2235…	0	1.17355e+07	2.1549e+07	1.10133e+07	1.33545e+07	1.25253e+07	1.1458e+07	2.02127e+07	2.88171e+07	1.92037e+07	9.33502e+06	9.86366e+06	5.81976e+06	-0.2466	0.269836	0.623244	0.808266	-0.824246	0.82065	5	9	6	7	7	5	7	9	9	3	4	3
Ribonuclease P protein subunit p30 OS=Homo sapiens OX=9606 GN=RPP30 PE=1 SV=1	RPP30	P78346	29322.2	Nucleus, nucleolus {ECO:0000305}.	Component of ribonuclease P, a ribonucleoprotein complex that generates mature tRNA molecules by cleaving their 5'-ends (PubMed:9037013, PubMed:9630247, PubMed:30454648). Also a component of the MRP ribonuclease complex, which cleaves pre-rRNA sequences (PubMed:28115465). {ECO:0000269|PubMed:28115465, ECO:0000269|PubMed:30454648, ECO:0000269|PubMed:9037013, ECO:0000269|PubMed:9630247}.	0	1.16862e+06	1.33083e+06	792304	1.55998e+06	1.48592e+06	1.31661e+06	1.4391e+06	1.48003e+06	2.14935e+06	2.14155e+06	2.22896e+06	1.65197e+06	0.406302	0.954606	0.622693	0.991513	0.871497	1.7152	0	0	2	2	0	0	0	0	0	0	0	2
Medium-chain specific acyl-CoA dehydrogenase, mitochondrial OS=Homo sapiens OX=9606 GN=ACADM PE=1 SV=1	ACADM	P11310	46589.5	Mitochondrion matrix.	Acyl-CoA dehydrogenase specific for acyl chain lengths of 4 to 16 that catalyzes the initial step of fatty acid beta-oxidation. Utilizes the electron transfer flavoprotein (ETF) as an electron acceptor to transfer electrons to the main mitochondrial respiratory chain via ETF-ubiquinone oxidoreductase (ETF dehydrogenase). {ECO:0000269|PubMed:25416781}.	0	1.67421e+07	2.24328e+07	1.35654e+07	1.52952e+07	2.59662e+07	2.99352e+07	3.3788e+07	3.28633e+07	1.45151e+07	4.23418e+07	2.78237e+07	2.58367e+07	0.432906	0.533466	0.621981	0.628201	0.864167	1.16649	8	8	8	5	11	12	10	11	9	10	8	8
Serine/threonine-protein kinase MRCK alpha OS=Homo sapiens OX=9606 GN=CDC42BPA PE=1 SV=1	CDC42BPA	Q5VT25	197311	Cytoplasm {ECO:0000250|UniProtKB:O54874}. Cell projection, lamellipodium {ECO:0000250|UniProtKB:Q3UU96}. Note=Displays a dispersed punctate distribution and concentrates along the cell periphery, especially at the leading edge and cell-cell junction. This concentration is PH-domain dependent. Localizes in the lamellipodium in a FAM89B/LRAP25-dependent manner. {ECO:0000250|UniProtKB:O54874, ECO:00…	Serine/threonine-protein kinase which is an important downstream effector of CDC42 and plays a role in the regulation of cytoskeleton reorganization and cell migration (PubMed:15723050, PubMed:9418861, PubMed:9092543). Regulates actin cytoskeletal reorganization via phosphorylation of PPP1R12C and MYL9/MLC2 (PubMed:21457715). In concert with MYO18A and LURAP1, is involved in modulating lamellar a…	0	1.04351e+06	1.70516e+06	2.34267e+06	2.47761e+06	2.35437e+06	2.22027e+06	2.93246e+06	2.59218e+06	2.30855e+06	3.08545e+06	2.53059e+06	2.02657e+06	0.470036	0.789065	0.621553	1.03126	0.58602	0.813363	2	0	2	0	0	0	0	2	0	0	0	0
Eukaryotic translation initiation factor 3 subunit G OS=Homo sapiens OX=9606 GN=EIF3G PE=1 SV=2	EIF3G	O75821	35612	Cytoplasm {ECO:0000255|HAMAP-Rule:MF_03006}. Nucleus {ECO:0000255|HAMAP-Rule:MF_03006, ECO:0000269|PubMed:17094969}. Cytoplasm, perinuclear region {ECO:0000255|HAMAP-Rule:MF_03006, ECO:0000269|PubMed:17094969}. Note=Colocalizes with AIFM1 in the nucleus and perinuclear region.	RNA-binding component of the eukaryotic translation initiation factor 3 (eIF-3) complex, which is required for several steps in the initiation of protein synthesis (PubMed:17581632, PubMed:25849773, PubMed:27462815). The eIF-3 complex associates with the 40S ribosome and facilitates the recruitment of eIF-1, eIF-1A, eIF-2:GTP:methionyl-tRNAi and eIF-5 to form the 43S pre-initiation complex (43S P…	0	3.37926e+06	2.92315e+06	2.07971e+06	3.75205e+06	4.88124e+06	3.27403e+06	3.36267e+06	3.65221e+06	5.86692e+06	2.80697e+06	3.40783e+06	2.87459e+06	0.506463	0.898647	0.619947	0.788683	0.11687	0.215379	0	2	2	2	3	2	0	0	3	0	0	2
Mitochondrial antiviral-signaling protein OS=Homo sapiens OX=9606 GN=MAVS PE=1 SV=2	MAVS	Q7Z434	56527.9	Mitochondrion outer membrane {ECO:0000269|PubMed:16125763}. Mitochondrion {ECO:0000269|PubMed:11780052, ECO:0000269|PubMed:17709747, ECO:0000269|PubMed:20127681, ECO:0000269|PubMed:21170385, ECO:0000269|PubMed:25135833}. Peroxisome {ECO:0000269|PubMed:20451243}.	Required for innate immune defense against viruses (PubMed:16125763, PubMed:16127453, PubMed:16153868, PubMed:16177806, PubMed:19631370, PubMed:20451243, PubMed:23087404, PubMed:20127681, PubMed:21170385). Acts downstream of DHX33, DDX58/RIG-I and IFIH1/MDA5, which detect intracellular dsRNA produced during viral replication, to coordinate pathways leading to the activation of NF-kappa-B, IRF3 an…	TRANSMEM 514..534; /note="Helical"; /evidence="ECO:0000255"	800868	1.59478e+06	1.23942e+06	1.61167e+06	1.6902e+06	2.50784e+06	2.00294e+06	1.8143e+06	1.76879e+06	2.70629e+06	2.32831e+06	2.48367e+06	0.676484	0.922296	0.619839	1.2685	1.04842	2.15201	2	0	0	0	0	2	0	0	0	0	0	0
DNA primase large subunit OS=Homo sapiens OX=9606 GN=PRIM2 PE=1 SV=2	PRIM2	P49643	58809.3	0	Regulatory subunit of the DNA primase complex and component of the DNA polymerase alpha complex (also known as the alpha DNA polymerase-primase complex) which play an essential role in the initiation of DNA synthesis (PubMed:9705292, PubMed:17893144). During the S phase of the cell cycle, the DNA polymerase alpha complex (composed of a catalytic subunit POLA1, an accessory subunit POLA2 and two p…	0	2.32336e+06	2.03085e+06	1.47587e+06	1.63555e+06	1.80922e+06	2.13007e+06	2.39274e+06	3.32009e+06	3.22656e+06	2.35691e+06	3.45229e+06	3.09915e+06	-0.0645827	0.106718	0.616661	1.26151	0.611644	1.18413	0	0	2	0	0	0	0	0	0	0	0	0
Mitochondrial carrier homolog 2 OS=Homo sapiens OX=9606 GN=MTCH2 PE=1 SV=1	MTCH2	Q9Y6C9	33331.6	Mitochondrion inner membrane {ECO:0000305}; Multi-pass membrane protein {ECO:0000305}.	The substrate transported is not yet known. Induces mitochondrial depolarization.	TRANSMEM 8..28; /note="Helical"; /evidence="ECO:0000255"; TRANSMEM 175..195; /note="Helical"; /evidence="ECO:0000255"; TRANSMEM 224..244; /note="Helical"; /evidence="ECO:0000255"	1.16671e+07	6.53333e+06	7.31877e+06	9.92156e+06	1.05241e+07	1.20214e+07	1.32592e+07	1.34029e+07	1.24473e+07	1.54873e+07	1.31657e+07	1.52653e+07	0.347392	0.605445	0.615933	1.30679	0.783237	1.59818	7	4	4	6	6	7	6	6	7	4	5	8
Erlin-2 OS=Homo sapiens OX=9606 GN=ERLIN2 PE=1 SV=1	ERLIN2	O94905	37840.4	Endoplasmic reticulum membrane {ECO:0000269|PubMed:16835267, ECO:0000269|PubMed:17502376, ECO:0000269|PubMed:19240031}; Single-pass type II membrane protein {ECO:0000269|PubMed:16835267, ECO:0000269|PubMed:17502376, ECO:0000269|PubMed:19240031}. Note=Associated with lipid raft-like domains of the endoplasmic reticulum membrane.	Component of the ERLIN1/ERLIN2 complex which mediates the endoplasmic reticulum-associated degradation (ERAD) of inositol 1,4,5-trisphosphate receptors (IP3Rs) such as ITPR1 (PubMed:19240031, PubMed:17502376). Promotes sterol-accelerated ERAD of HMGCR probably implicating an AMFR/gp78-containing ubiquitin ligase complex (PubMed:21343306). Involved in regulation of cellular cholesterol homeostasis…	TRANSMEM 4..24; /note="Helical"; /evidence="ECO:0000255"	2.85685e+06	5.36538e+06	5.81699e+06	6.99746e+06	6.91497e+06	1.06654e+07	6.817e+06	8.10067e+06	6.59472e+06	8.07911e+06	8.01446e+06	1.04291e+07	0.807895	1.07096	0.615704	1.13359	0.917765	1.57297	2	2	0	3	3	5	3	3	6	0	3	0
Zinc finger RNA-binding protein OS=Homo sapiens OX=9606 GN=ZFR PE=1 SV=2	ZFR	Q96KR1	117012	Nucleus {ECO:0000250}. Cytoplasm {ECO:0000250}. Cytoplasmic granule {ECO:0000250}. Chromosome {ECO:0000250}. Note=Associated with chromosome foci in meiotic cells. Localizes in somatodendritic compartment of primary hippocampal neurons. Colocalizes with STAU2 in several cytosolic RNA granules (By similarity). {ECO:0000250}.	Involved in postimplantation and gastrulation stages of development. Involved in the nucleocytoplasmic shuttling of STAU2. Binds to DNA and RNA (By similarity). {ECO:0000250}.	0	1.81643e+06	1.8428e+06	725413	1.39056e+06	4.41255e+06	4.64632e+06	1.07151e+06	1.15479e+06	4.48477e+06	5.05055e+06	8.34489e+06	8.86545e+06	1.25289	0.844662	0.614083	0.261311	2.34398	2.05281	3	2	2	2	7	6	3	2	5	5	8	10
Proliferation-associated protein 2G4 OS=Homo sapiens OX=9606 GN=PA2G4 PE=1 SV=3	PA2G4	Q9UQ80	43786.7	[Isoform 1]: Cytoplasm {ECO:0000269|PubMed:16832058, ECO:0000269|PubMed:19037095}. Nucleus, nucleolus {ECO:0000269|PubMed:16832058, ECO:0000269|PubMed:19037095}. Note=Translocates to the nucleus upon treatment with HRG. Phosphorylation at Ser-361 by PKC/PRKCD regulates its nucleolar localization. {ECO:0000269|PubMed:16832058}.; [Isoform 2]: Cytoplasm {ECO:0000269|PubMed:16832058, ECO:0000269|PubM…	May play a role in a ERBB3-regulated signal transduction pathway. Seems be involved in growth regulation. Acts a corepressor of the androgen receptor (AR) and is regulated by the ERBB3 ligand neuregulin-1/heregulin (HRG). Inhibits transcription of some E2F1-regulated promoters, probably by recruiting histone acetylase (HAT) activity. Binds RNA. Associates with 28S, 18S and 5.8S mature rRNAs, seve…	0	2.09028e+06	4.08016e+06	6.59364e+06	1.46577e+07	4.1464e+06	7.4113e+06	7.66262e+06	5.17608e+06	6.68369e+06	6.44424e+06	5.74392e+06	1.63481e+06	1.03833	0.59528	0.613041	0.687962	0.114979	0.0616618	4	2	4	6	4	2	3	3	4	0	0	2
Hydroxyacyl-coenzyme A dehydrogenase, mitochondrial OS=Homo sapiens OX=9606 GN=HADH PE=1 SV=3	HADH	Q16836	34294.2	Mitochondrion matrix {ECO:0000305|PubMed:8687463}.	Mitochondrial fatty acid beta-oxidation enzyme that catalyzes the third step of the beta-oxidation cycle for medium and short-chain 3-hydroxy fatty acyl-CoAs (C4 to C10) (PubMed:10231530, PubMed:11489939, PubMed:16725361). Plays a role in the control of insulin secretion by inhibiting the activation of glutamate dehydrogenase 1 (GLUD1), an enzyme that has an important role in regulating amino aci…	0	1.45883e+06	1.57277e+06	261710	761903	2.68824e+06	1.27888e+06	2.65028e+06	1.72318e+06	651699	1.02313e+06	1.34699e+06	1.42257e+06	0.522005	0.26889	0.609631	0.333557	0.203686	0.141138	2	2	2	2	4	3	4	0	3	2	0	0
Activity-dependent neuroprotector homeobox protein OS=Homo sapiens OX=9606 GN=ADNP PE=1 SV=1	ADNP	Q9H2P0	123564	Nucleus {ECO:0000255|PROSITE-ProRule:PRU00108}.	Potential transcription factor. May mediate some of the neuroprotective peptide VIP-associated effects involving normal growth and cancer proliferation.	0	1.60975e+06	1.2874e+06	995988	1.59472e+06	1.34269e+06	1.04185e+06	2.60685e+06	1.7101e+06	1.62253e+06	1.42314e+06	1.97639e+06	2.24148e+06	0.0315667	0.0409326	0.609402	0.879906	0.53502	0.908823	0	0	0	0	2	0	0	0	0	0	0	0
Glycogen phosphorylase, liver form OS=Homo sapiens OX=9606 GN=PYGL PE=1 SV=4	PYGL	P06737	97152.4	0	Phosphorylase is an important allosteric enzyme in carbohydrate metabolism. Enzymes from different sources differ in their regulatory mechanisms and in their natural substrates. However, all known phosphorylases share catalytic and structural properties.	0	2.90924e+06	4.03512e+06	3.65888e+06	1.31817e+07	1.07493e+07	6.66923e+06	2.48663e+06	6.00753e+06	7.66866e+06	4.81079e+06	4.89336e+06	4.45211e+06	1.52904	1.58663	0.608175	0.520844	0.416936	1.52884	2	0	4	8	7	4	2	0	6	0	0	3
Pyruvate dehydrogenase E1 component subunit alpha, somatic form, mitochondrial OS=Homo sapiens OX=9606 GN=PDHA1 PE=1 SV=3	PDHA1	P08559	43296.5	Mitochondrion matrix.	The pyruvate dehydrogenase complex catalyzes the overall conversion of pyruvate to acetyl-CoA and CO(2), and thereby links the glycolytic pathway to the tricarboxylic cycle. {ECO:0000269|PubMed:19081061, ECO:0000269|PubMed:7782287}.	0	1.81893e+07	1.4353e+07	1.20841e+07	9.85225e+06	1.94988e+07	2.00288e+07	2.45975e+07	2.1894e+07	2.13105e+07	2.20736e+07	2.64273e+07	5.68055e+06	0.14603	0.158099	0.603433	1.70753	0.279903	0.185198	5	3	6	5	7	5	4	3	6	5	3	2
Probable ATP-dependent RNA helicase DDX6 OS=Homo sapiens OX=9606 GN=DDX6 PE=1 SV=2	DDX6	P26196	54418.6	Cytoplasm, P-body {ECO:0000269|PubMed:16364915, ECO:0000269|PubMed:16699599, ECO:0000269|PubMed:20616046, ECO:0000269|PubMed:22915799, ECO:0000269|PubMed:25995375, ECO:0000269|PubMed:26184334, ECO:0000269|PubMed:31422817, ECO:0000269|PubMed:32354837}. Cytoplasm {ECO:0000269|PubMed:26184334, ECO:0000269|PubMed:28216671}. Nucleus {ECO:0000269|PubMed:26184334, ECO:0000269|PubMed:28216671}. Note=Impo…	Essential for the formation of P-bodies, cytosolic membrane-less ribonucleoprotein granules involved in RNA metabolism through the coordinated storage of mRNAs encoding regulatory functions (PubMed:25995375, PubMed:27342281, PubMed:31422817). Plays a role in P-bodies to coordinate the storage of translationally inactive mRNAs in the cytoplasm and prevent their degradation (PubMed:27342281). In th…	0	2.39674e+06	5.94785e+06	2.55856e+06	8.10514e+06	5.77094e+06	1.21015e+07	5.11915e+06	5.96522e+06	5.47596e+06	4.92735e+06	2.95537e+06	3.08214e+06	1.25252	1.08312	0.602987	0.729872	0.00814387	0.00510065	2	6	3	8	4	9	0	0	5	0	0	4
26S proteasome non-ATPase regulatory subunit 4 OS=Homo sapiens OX=9606 GN=PSMD4 PE=1 SV=1	PSMD4	P55036	40737.2	0	Component of the 26S proteasome, a multiprotein complex involved in the ATP-dependent degradation of ubiquitinated proteins. This complex plays a key role in the maintenance of protein homeostasis by removing misfolded or damaged proteins, which could impair cellular functions, and by removing proteins whose functions are no longer required. Therefore, the proteasome participates in numerous cell…	0	1.81334e+06	2.04125e+06	1.88823e+06	1.74901e+06	1.90563e+06	2.12406e+06	2.25176e+06	2.70677e+06	3.75537e+06	2.52414e+06	2.34819e+06	2.33592e+06	0.0089866	0.0315558	0.601561	1.03303	0.327892	2.24361	2	0	0	0	0	0	0	0	0	0	0	0
Lymphoid-specific helicase OS=Homo sapiens OX=9606 GN=HELLS PE=1 SV=1	HELLS	Q9NRZ9	97078.2	Nucleus {ECO:0000250}. Note=Closely associated with pericentric heterochromatin. {ECO:0000250}.	Plays an essential role in normal development and survival. Involved in regulation of the expansion or survival of lymphoid cells. Required for de novo or maintenance DNA methylation. May control silencing of the imprinted CDKN1C gene through DNA methylation. May play a role in formation and organization of heterochromatin, implying a functional role in the regulation of transcription and mitosis…	0	1.00139e+06	974043	1.26368e+06	1.4199e+06	1.4445e+06	1.15132e+06	1.39786e+06	2.34212e+06	1.1721e+06	1.69572e+06	2.24853e+06	2.18075e+06	0.310059	0.918132	0.600735	0.685495	0.919112	2.08887	2	0	2	0	0	0	0	2	0	0	0	0
Zinc finger MYM-type protein 4 OS=Homo sapiens OX=9606 GN=ZMYM4 PE=1 SV=1	ZMYM4	Q5VZL5	172790	0	Plays a role in the regulation of cell morphology and cytoskeletal organization. {ECO:0000269|PubMed:21834987}.	0	1.29875e+06	867525	1.01057e+06	1.09253e+06	1.00186e+06	1.06077e+06	1.73191e+06	1.27608e+06	1.80669e+06	1.93487e+06	961368	1.94558e+06	-0.00987777	0.0185434	0.599845	1.22848	0.607954	0.725683	0	0	0	2	2	0	0	0	0	0	0	0
Band 4.1-like protein 2 OS=Homo sapiens OX=9606 GN=EPB41L2 PE=1 SV=1	EPB41L2	O43491	112588	Cytoplasm, cytoskeleton {ECO:0000250}. Cytoplasm, cell cortex {ECO:0000269|PubMed:23870127}. Cell membrane {ECO:0000269|PubMed:22361696}.	Required for dynein-dynactin complex and NUMA1 recruitment at the mitotic cell cortex during anaphase (PubMed:23870127). {ECO:0000269|PubMed:23870127}.	0	1.37663e+06	1.98005e+06	2.01609e+06	6.50853e+06	1.55008e+06	4.78658e+06	2.37187e+06	2.52722e+06	3.23297e+06	3.60371e+06	2.78892e+06	1.97314e+06	1.25749	0.782442	0.597956	1.28184	0.638833	0.905043	0	3	2	6	2	3	0	0	4	0	0	2
Calreticulin OS=Homo sapiens OX=9606 GN=CALR PE=1 SV=1	CALR	P27797	48142.9	Endoplasmic reticulum lumen {ECO:0000269|PubMed:10358038, ECO:0000269|PubMed:11149926}. Cytoplasm, cytosol {ECO:0000269|PubMed:11149926}. Secreted, extracellular space, extracellular matrix {ECO:0000305}. Cell surface {ECO:0000269|PubMed:10358038}. Sarcoplasmic reticulum lumen {ECO:0000250|UniProtKB:P28491}. Note=Also found in cell surface (T cells), cytosol and extracellular matrix (PubMed:10358…	Calcium-binding chaperone that promotes folding, oligomeric assembly and quality control in the endoplasmic reticulum (ER) via the calreticulin/calnexin cycle. This lectin interacts transiently with almost all of the monoglucosylated glycoproteins that are synthesized in the ER. Interacts with the DNA-binding domain of NR3C1 and mediates its nuclear export. Involved in maternal gene expression re…	0	1.35531e+07	1.55213e+07	6.95903e+06	2.29544e+07	2.65508e+07	1.69825e+07	1.75457e+07	1.36831e+07	2.32722e+07	1.67474e+07	1.58609e+07	2.0789e+07	0.883752	1.25188	0.596947	0.742735	0.567429	0.899698	9	10	8	14	16	12	8	8	13	8	8	12
CXXC-type zinc finger protein 1 OS=Homo sapiens OX=9606 GN=CXXC1 PE=1 SV=2	CXXC1	Q9P0U4	75712.1	Nucleus speckle {ECO:0000269|PubMed:12200428, ECO:0000269|PubMed:17355966}. Nucleus {ECO:0000250|UniProtKB:Q9CWW7}. Note=Associated with euchromatin. During mitosis, excluded from condensed chromosomes.	Transcriptional activator that exhibits a unique DNA binding specificity for CpG unmethylated motifs with a preference for CpGG. {ECO:0000269|PubMed:21407193}.	0	1.75814e+06	2.4803e+06	1.10786e+06	1.64529e+06	2.80885e+06	1.84482e+06	1.58774e+06	3.94712e+06	2.53505e+06	3.00874e+06	1.81822e+06	1.60302e+06	0.236573	0.233061	0.594013	0.50101	0.266274	0.241451	0	0	2	2	3	0	0	0	0	0	0	3
Cytoskeleton-associated protein 4 OS=Homo sapiens OX=9606 GN=CKAP4 PE=1 SV=2	CKAP4	Q07065	66022.2	Endoplasmic reticulum membrane {ECO:0000269|PubMed:18296695, ECO:0000269|PubMed:19144824}; Single-pass type II membrane protein. Cell membrane {ECO:0000269|PubMed:18296695, ECO:0000269|PubMed:19144824}; Single-pass type II membrane protein. Cytoplasm, cytoskeleton. Cytoplasm, perinuclear region. Note=Translocates to the perinuclear region upon APF-stimulation.	Mediates the anchoring of the endoplasmic reticulum to microtubules. {ECO:0000269|PubMed:15703217}.; High-affinity epithelial cell surface receptor for the FZD8-related low molecular weight sialoglycopeptide APF/antiproliferative factor. Mediates the APF antiproliferative signaling within cells. {ECO:0000269|PubMed:17030514, ECO:0000269|PubMed:19144824}.	TRANSMEM 107..127; /note="Helical"; /evidence="ECO:0000255"	1.4087e+07	1.85675e+07	1.38091e+07	1.64837e+07	1.42757e+07	2.32232e+07	2.75072e+07	2.58495e+07	1.67706e+07	2.5339e+07	2.34617e+07	1.09107e+07	0.216396	0.333157	0.593875	1.00678	0.361907	0.389079	9	9	9	8	10	11	10	8	11	7	8	5
Histone H3.2 OS=Homo sapiens OX=9606 GN=H3C15 PE=1 SV=3	H3C15	Q71DI3	15388.7	Nucleus. Chromosome.	Core component of nucleosome. Nucleosomes wrap and compact DNA into chromatin, limiting DNA accessibility to the cellular machineries which require DNA as a template. Histones thereby play a central role in transcription regulation, DNA repair, DNA replication and chromosomal stability. DNA accessibility is regulated via a complex set of post-translational modifications of histones, also called h…	0	1.64854e+06	1.56663e+06	1.20899e+06	2.26601e+06	1.64078e+06	1.65742e+06	1.67572e+06	1.77416e+06	3.22665e+06	3.07801e+06	1.22628e+06	1.37835e+06	0.330776	0.704877	0.593698	0.654215	0.361161	0.276877	0	0	2	0	0	0	0	0	3	2	2	0
Centrosomal protein of 170 kDa OS=Homo sapiens OX=9606 GN=CEP170 PE=1 SV=1	CEP170	Q5SW79	175296	Cytoplasm, cytoskeleton, microtubule organizing center, centrosome, centriole {ECO:0000269|PubMed:15616186, ECO:0000269|PubMed:23386061}. Cytoplasm, cytoskeleton, spindle {ECO:0000269|PubMed:15616186}. Note=Associated with the mature mother centriole. Associated with spindle microtubules during mitosis. Localizes to the distal appendage region of the centriole. {ECO:0000269|PubMed:23386061}.	Plays a role in microtubule organization (PubMed:15616186). Required for centriole subdistal appendage assembly (PubMed:28422092). {ECO:0000269|PubMed:15616186, ECO:0000269|PubMed:28422092}.	0	656514	768721	1.0079e+06	794965	622851	832162	1.84688e+06	859175	963204	1.1965e+06	570230	1.14837e+06	-0.112905	0.191682	0.592673	0.552947	0.260733	0.286515	0	2	2	0	0	0	2	0	0	0	2	0
U2 snRNP-associated SURP motif-containing protein OS=Homo sapiens OX=9606 GN=U2SURP PE=1 SV=2	U2SURP	O15042	118296	Nucleus {ECO:0000269|PubMed:20858735}.	0	0	9.99218e+06	1.21593e+07	8.16896e+06	1.90371e+07	1.63444e+07	1.63967e+07	2.0218e+07	1.33016e+07	1.21916e+07	4.44375e+07	2.37153e+07	1.5814e+07	0.772056	2.09825	0.59226	0.863502	1.46953	0.972808	6	10	6	10	11	9	10	6	7	14	9	11
Phosphatidylethanolamine-binding protein 1 OS=Homo sapiens OX=9606 GN=PEBP1 PE=1 SV=3	PEBP1	P30086	21056.9	Cytoplasm {ECO:0000250}.	Binds ATP, opioids and phosphatidylethanolamine. Has lower affinity for phosphatidylinositol and phosphatidylcholine. Serine protease inhibitor which inhibits thrombin, neuropsin and chymotrypsin but not trypsin, tissue type plasminogen activator and elastase (By similarity). Inhibits the kinase activity of RAF1 by inhibiting its activation and by dissociating the RAF1/MEK complex and acting as a…	0	1.66022e+06	1.94838e+06	1.59709e+06	2.74007e+06	1.4754e+06	1.83858e+06	3.08528e+06	2.2323e+06	2.51111e+06	3.03446e+06	2.29628e+06	2.76717e+06	0.217813	0.292649	0.588682	1.48198	0.637459	1.79036	0	0	0	0	0	0	0	0	0	2	2	0
60S ribosomal protein L11 OS=Homo sapiens OX=9606 GN=RPL11 PE=1 SV=2	RPL11	P62913	20253.2	Nucleus, nucleolus {ECO:0000269|PubMed:27829214}. Cytoplasm {ECO:0000250|UniProtKB:Q9CXW4}.	Component of the ribosome, a large ribonucleoprotein complex responsible for the synthesis of proteins in the cell. The small ribosomal subunit (SSU) binds messenger RNAs (mRNAs) and translates the encoded message by selecting cognate aminoacyl-transfer RNA (tRNA) molecules. The large subunit (LSU) contains the ribosomal catalytic site termed the peptidyl transferase center (PTC), which catalyzes…	0	8.41065e+06	7.10731e+06	5.62339e+06	4.76988e+06	8.91826e+06	6.05699e+06	5.13822e+06	1.72269e+07	9.40708e+06	1.78162e+07	8.90248e+06	1.07023e+07	-0.0985706	0.115274	0.587695	0.415404	0.82378	0.891334	2	3	3	3	2	3	2	2	3	2	2	2
DnaJ homolog subfamily A member 2 OS=Homo sapiens OX=9606 GN=DNAJA2 PE=1 SV=1	DNAJA2	O60884	45745.7	Membrane {ECO:0000305}; Lipid-anchor {ECO:0000305}.	Co-chaperone of Hsc70. Stimulates ATP hydrolysis and the folding of unfolded proteins mediated by HSPA1A/B (in vitro) (PubMed:24318877). {ECO:0000269|PubMed:24318877}.	0	3.24122e+06	5.1459e+06	850701	9.92242e+06	3.72679e+06	7.37526e+06	4.55852e+06	4.37972e+06	4.93644e+06	7.93625e+06	6.48496e+06	4.47703e+06	1.18644	0.833773	0.58683	0.545125	1.03263	0.943345	3	4	2	6	4	5	4	3	4	3	3	3
Splicing factor 1 OS=Homo sapiens OX=9606 GN=SF1 PE=1 SV=4	SF1	Q15637	68330.5	Nucleus.	Necessary for the ATP-dependent first step of spliceosome assembly. Binds to the intron branch point sequence (BPS) 5'-UACUAAC-3' of the pre-mRNA. May act as transcription repressor. {ECO:0000269|PubMed:10449420, ECO:0000269|PubMed:8752089, ECO:0000269|PubMed:9660765}.	0	3.98344e+06	2.11228e+06	2.24082e+06	2.88423e+06	3.76596e+06	5.39613e+06	5.80092e+06	5.4093e+06	1.25886e+06	1.51725e+07	8.58473e+06	7.5014e+06	0.531071	0.579051	0.580835	0.365781	1.90673	1.43733	3	6	7	5	6	7	7	6	3	8	9	8
Isobutyryl-CoA dehydrogenase, mitochondrial OS=Homo sapiens OX=9606 GN=ACAD8 PE=1 SV=1	ACAD8	Q9UKU7	45070.1	Mitochondrion {ECO:0000269|PubMed:11013134, ECO:0000269|PubMed:12359132}.	Isobutyryl-CoA dehydrogenase which catalyzes one of the steps of the valine catabolic pathway (PubMed:11013134, PubMed:12359132, PubMed:16857760). To a lesser extent, is also able to catalyze the oxidation of (2S)-2-methylbutanoyl-CoA (PubMed:11013134, PubMed:12359132). {ECO:0000269|PubMed:11013134, ECO:0000269|PubMed:12359132, ECO:0000269|PubMed:16857760}.	0	1.6456e+06	2.05728e+06	1.62864e+06	1.67785e+06	1.86662e+06	2.30733e+06	2.17065e+06	2.61103e+06	3.18821e+06	2.34937e+06	1.73418e+06	1.80895e+06	0.134334	0.302313	0.580014	1.26486	0.144335	0.320588	0	0	2	0	2	2	0	0	0	0	0	0
Junction plakoglobin OS=Homo sapiens OX=9606 GN=JUP PE=1 SV=3	JUP	P14923	81745.9	Cell junction, adherens junction {ECO:0000269|PubMed:22781308}. Cell junction, desmosome {ECO:0000269|PubMed:22781308}. Cytoplasm, cytoskeleton {ECO:0000269|PubMed:22781308}. Membrane {ECO:0000269|PubMed:22781308}; Peripheral membrane protein {ECO:0000269|PubMed:22781308}. Note=Cytoplasmic in a soluble and membrane-associated form.	Common junctional plaque protein. The membrane-associated plaques are architectural elements in an important strategic position to influence the arrangement and function of both the cytoskeleton and the cells within the tissue. The presence of plakoglobin in both the desmosomes and in the intermediate junctions suggests that it plays a central role in the structure and function of submembranous p…	0	5.32683e+06	4.15701e+06	1.59491e+06	719298	987340	256866	9.30285e+06	2.97087e+06	4.27921e+06	1.98301e+06	1.69604e+07	342357	-2.49629	1.26994	0.579292	0.339395	0.799744	0.194413	7	0	4	3	3	2	6	0	4	0	11	2
Golgi resident protein GCP60 OS=Homo sapiens OX=9606 GN=ACBD3 PE=1 SV=4	ACBD3	Q9H3P7	60592.7	Golgi apparatus membrane {ECO:0000269|PubMed:22124328, ECO:0000269|PubMed:27009356, ECO:0000269|PubMed:30755512, ECO:0000269|PubMed:31381608}; Peripheral membrane protein {ECO:0000305|PubMed:31381608}; Cytoplasmic side {ECO:0000250}. Mitochondrion {ECO:0000250}. Note=Also mitochondrial (via its interaction with PBR). {ECO:0000250}.	Involved in the maintenance of Golgi structure by interacting with giantin, affecting protein transport between the endoplasmic reticulum and Golgi (PubMed:11590181). Involved in hormone-induced steroid biosynthesis in testicular Leydig cells (By similarity). Recruits PI4KB to the Golgi apparatus membrane; enhances the enzyme activity of PI4KB activity via its membrane recruitment thereby increas…	0	3.72402e+06	6.05285e+06	5.72212e+06	4.56366e+06	6.3303e+06	7.38113e+06	7.16395e+06	9.82783e+06	6.1596e+06	8.05576e+06	6.86542e+06	6.29021e+06	0.237704	0.350004	0.578924	0.905767	0.452665	0.998912	3	4	7	4	5	5	4	4	5	3	4	4
Trifunctional enzyme subunit beta, mitochondrial OS=Homo sapiens OX=9606 GN=HADHB PE=1 SV=3	HADHB	P55084	51296	Mitochondrion {ECO:0000269|PubMed:21527675}. Mitochondrion inner membrane {ECO:0000269|PubMed:21527675}. Mitochondrion outer membrane {ECO:0000269|PubMed:21527675}. Endoplasmic reticulum {ECO:0000269|PubMed:21527675}. Note=Protein stability and association with membranes require HADHA. {ECO:0000269|PubMed:29915090}.	Mitochondrial trifunctional enzyme catalyzes the last three of the four reactions of the mitochondrial beta-oxidation pathway (PubMed:8135828, PubMed:29915090, PubMed:30850536). The mitochondrial beta-oxidation pathway is the major energy-producing process in tissues and is performed through four consecutive reactions breaking down fatty acids into acetyl-CoA (PubMed:29915090). Among the enzymes …	0	3.17408e+07	3.175e+07	1.68617e+07	3.08651e+07	4.39538e+07	2.62137e+07	5.47731e+07	4.44246e+07	2.05695e+07	4.29141e+07	4.74822e+07	2.51368e+07	0.330408	0.401673	0.57582	0.510405	0.523894	0.625997	8	10	7	9	11	7	10	8	10	7	10	8
CAAX prenyl protease 1 homolog OS=Homo sapiens OX=9606 GN=ZMPSTE24 PE=1 SV=2	ZMPSTE24	O75844	54816	Endoplasmic reticulum membrane {ECO:0000269|PubMed:23539603}; Multi-pass membrane protein {ECO:0000269|PubMed:23539603}. Nucleus inner membrane {ECO:0000269|PubMed:23539603}; Multi-pass membrane protein {ECO:0000269|PubMed:23539603}.	Proteolytically removes the C-terminal three residues of farnesylated proteins. Acts on lamin A/C.	TRANSMEM 19..39; /note="Helical"; /evidence="ECO:0000255"; TRANSMEM 82..102; /note="Helical"; /evidence="ECO:0000255"; TRANSMEM 124..144; /note="Helical"; /evidence="ECO:0000255"; TRANSMEM 171..191; /note="Helical"; /evidence="ECO:0000255"; TRANSMEM 196..216; /note="Helical"; /evidence="ECO:0000255"; TRANSMEM 348..368; /note="Helical"; /evidence="ECO:0000255"; TRANSMEM 383..405; /note="Helical"; …	6.52891e+06	5.01222e+06	1.45432e+06	4.90414e+06	5.43869e+06	8.60376e+06	4.21275e+06	1.06546e+07	4.45428e+06	6.89101e+06	7.07781e+06	5.63315e+06	0.543931	0.450412	0.572208	0.336136	0.592991	0.631585	4	3	3	3	5	5	3	3	4	0	2	3
Cytosol aminopeptidase OS=Homo sapiens OX=9606 GN=LAP3 PE=1 SV=3	LAP3	P28838	56167.8	Cytoplasm {ECO:0000250|UniProtKB:Q68FS4}.	Cytolosic metallopeptidase that catalyzes the removal of unsubstituted N-terminal hydrophobic amino acids from various peptides. The presence of Zn(2+) ions is essential for the peptidase activity, and the association with other cofactors can modulate the substrate spectificity of the enzyme. For instance, in the presence of Mn(2+), it displays a specific Cys-Gly hydrolyzing activity of Cys-Gly-S…	0	1.66928e+06	2.3745e+06	2.55013e+06	2.6188e+06	6.83905e+06	8.66578e+06	3.05532e+06	3.2032e+06	3.52397e+06	3.45471e+06	4.49135e+06	4.15553e+06	1.45866	0.995421	0.569066	1.60863	0.87599	1.96902	2	2	0	2	6	5	2	2	0	0	0	0
Complement component 1 Q subcomponent-binding protein, mitochondrial OS=Homo sapiens OX=9606 GN=C1QBP PE=1 SV=1	C1QBP	Q07021	31362.6	Mitochondrion matrix {ECO:0000269|PubMed:15031724, ECO:0000269|PubMed:17486078, ECO:0000269|PubMed:19164550, ECO:0000269|PubMed:9305894}. Nucleus {ECO:0000269|PubMed:18676636}. Cell membrane {ECO:0000269|PubMed:10747014, ECO:0000269|PubMed:11493647, ECO:0000269|PubMed:12574814, ECO:0000269|PubMed:8195709, ECO:0000269|PubMed:8662673, ECO:0000269|PubMed:9191880, ECO:0000269|PubMed:9233640}; Periphe…	Is believed to be a multifunctional and multicompartmental protein involved in inflammation and infection processes, ribosome biogenesis, protein synthesis in mitochondria, regulation of apoptosis, transcriptional regulation and pre-mRNA splicing. At the cell surface is thought to act as an endothelial receptor for plasma proteins of the complement and kallikrein-kinin cascades. Putative receptor…	0	1.58378e+07	1.84782e+07	1.78642e+07	2.97005e+07	2.96649e+07	3.47399e+07	2.55639e+07	2.36922e+07	2.81041e+07	2.22292e+07	15587700	1.84411e+07	0.850772	2.77045	0.568086	2.2932	0.108555	0.259996	6	6	6	8	9	8	7	8	9	7	4	6
Putative RNA-binding protein Luc7-like 1 OS=Homo sapiens OX=9606 GN=LUC7L PE=1 SV=1	LUC7L	Q9NQ29	43729.1	0	May bind to RNA via its Arg/Ser-rich domain. {ECO:0000269|PubMed:11170747}.	0	1.06228e+07	1.29225e+07	8.95967e+06	8.01084e+06	9.2293e+06	8.44338e+06	1.95086e+07	2.20979e+07	6.55344e+06	2.32329e+07	1.65117e+07	1.18103e+07	-0.339816	0.880337	0.567174	0.45505	0.66545	0.840059	7	6	6	4	4	6	7	7	4	7	6	6
DnaJ homolog subfamily B member 1 OS=Homo sapiens OX=9606 GN=DNAJB1 PE=1 SV=4	DNAJB1	P25685	38045.6	Cytoplasm {ECO:0000269|PubMed:1586970}. Nucleus {ECO:0000269|PubMed:1586970}. Nucleus, nucleolus {ECO:0000269|PubMed:1586970}. Note=Translocates rapidly from the cytoplasm to the nucleus, and especially to the nucleoli, upon heat shock.	Interacts with HSP70 and can stimulate its ATPase activity. Stimulates the association between HSC70 and HIP. Negatively regulates heat shock-induced HSF1 transcriptional activity during the attenuation and recovery phase period of the heat shock response (PubMed:9499401). Stimulates ATP hydrolysis and the folding of unfolded proteins mediated by HSPA1A/B (in vitro) (PubMed:24318877). {ECO:000026…	0	1.19355e+06	1.39564e+06	737753	1.0554e+06	973328	1.40425e+06	1.3496e+06	1.59811e+06	1.97953e+06	1.31525e+06	1.18623e+06	1.20096e+06	0.045265	0.0516827	0.566583	0.933181	0.154277	0.249403	0	0	2	0	2	0	0	0	0	0	0	0
Polyadenylate-binding protein 4 OS=Homo sapiens OX=9606 GN=PABPC4 PE=1 SV=1	PABPC4	Q13310	70783.8	Cytoplasm {ECO:0000269|PubMed:17289661}. Note=Localized in cytoplasmic mRNP granules containing untranslated mRNAs.	Binds the poly(A) tail of mRNA. May be involved in cytoplasmic regulatory processes of mRNA metabolism. Can probably bind to cytoplasmic RNA sequences other than poly(A) in vivo (By similarity). {ECO:0000250}.	0	2.38281e+07	1.84827e+07	1.8557e+07	2.21038e+07	3.46453e+07	2.43855e+07	3.0839e+07	3.46365e+07	2.46548e+07	2.61028e+07	1.88892e+07	1.82792e+07	0.41464	0.729099	0.566334	1.34003	0.0558707	0.0930234	10	5	9	11	13	10	10	8	11	6	6	6
Sterol-4-alpha-carboxylate 3-dehydrogenase, decarboxylating OS=Homo sapiens OX=9606 GN=NSDHL PE=1 SV=2	NSDHL	Q15738	41900.8	Endoplasmic reticulum membrane {ECO:0000269|PubMed:21129721}; Single-pass membrane protein {ECO:0000255}. Lipid droplet {ECO:0000250|UniProtKB:Q9R1J0}. Note=Trafficking through the Golgi is necessary for ER membrane localization. {ECO:0000250|UniProtKB:Q9R1J0}.	Catalyzes the NAD(P)(+)-dependent oxidative decarboxylation of the C4 methyl groups of 4-alpha-carboxysterols in post-squalene cholesterol biosynthesis (By similarity). Plays also a role in the regulation of the endocytic trafficking of EGFR (By similarity). {ECO:0000250|UniProtKB:Q9R1J0}.	TRANSMEM 298..318; /note="Helical"; /evidence="ECO:0000255"	1.11283e+07	1.52557e+07	1.25411e+07	1.24954e+07	6.33734e+06	1.81755e+07	1.77096e+07	2.3804e+07	1.60138e+07	2.58188e+07	1.71778e+07	1.33711e+07	-0.0728499	0.0611236	0.56355	1.09719	0.534169	0.681848	7	8	8	10	6	7	8	10	9	7	8	5
Double-stranded RNA-binding protein Staufen homolog 1 OS=Homo sapiens OX=9606 GN=STAU1 PE=1 SV=2	STAU1	O95793	63183.1	Cytoplasm {ECO:0000269|PubMed:19029303}. Rough endoplasmic reticulum {ECO:0000269|PubMed:19029303}. Note=Localizes exclusively with the rough reticulum endoplasmic (RER).	Binds double-stranded RNA (regardless of the sequence) and tubulin. May play a role in specific positioning of mRNAs at given sites in the cell by cross-linking cytoskeletal and RNA components, and in stimulating their translation at the site.; (Microbial infection) Plays a role in virus particles production of many viruses including of HIV-1, HERV-K, ebola virus and influenza virus. Acts by inte…	0	1.99018e+06	2.9188e+06	1.92247e+06	1.62638e+06	1.57803e+06	2.51315e+06	2.99325e+06	4.65897e+06	2.44118e+06	2.56688e+06	2.08473e+06	896637	-0.25679	0.348203	0.563149	0.666176	-0.300159	0.292871	0	0	0	2	0	0	0	0	0	0	0	2
RNA-binding protein 26 OS=Homo sapiens OX=9606 GN=RBM26 PE=1 SV=3	RBM26	Q5T8P6	113600	0	0	0	4.17163e+06	3.05984e+06	5.77725e+06	6.02439e+06	5.34568e+06	1.03897e+07	4.30716e+06	9.83296e+06	5.06167e+06	6.28458e+06	9.1334e+06	7.98523e+06	0.742187	0.759485	0.561762	0.470268	0.847228	1.41172	5	6	7	8	7	9	4	7	5	6	7	7
Phosphoserine aminotransferase OS=Homo sapiens OX=9606 GN=PSAT1 PE=1 SV=2	PSAT1	Q9Y617	40423.3	0	Catalyzes the reversible conversion of 3-phosphohydroxypyruvate to phosphoserine and of 3-hydroxy-2-oxo-4-phosphonooxybutanoate to phosphohydroxythreonine. {ECO:0000250|UniProtKB:P10658}.	0	3.11218e+06	2.88648e+06	3.26417e+06	4.45559e+06	6.49286e+06	4.59037e+06	5.11115e+06	4.76728e+06	3.7923e+06	5.43939e+06	4.22002e+06	4.41819e+06	0.746352	1.45659	0.561566	1.63675	0.603875	1.82095	2	0	2	2	4	0	0	0	4	0	0	2
5'-3' exoribonuclease 1 OS=Homo sapiens OX=9606 GN=XRN1 PE=1 SV=1	XRN1	Q8IZH2	194110	Cytoplasm {ECO:0000269|PubMed:12515382, ECO:0000269|PubMed:14580940, ECO:0000269|PubMed:9802570}. Note=Discrete foci at the inner surface of the cell membrane.	Major 5'-3' exoribonuclease involved in mRNA decay. Required for the 5'-3'-processing of the G4 tetraplex-containing DNA and RNA substrates. The kinetic of hydrolysis is faster for G4 RNA tetraplex than for G4 DNA tetraplex and monomeric RNA tetraplex. Binds to RNA and DNA (By similarity). Plays a role in replication-dependent histone mRNA degradation. May act as a tumor suppressor protein in ost…	0	2.2204e+06	2.29124e+06	1.37982e+06	3.7666e+06	2.35484e+06	2.22979e+06	2.72231e+06	3.22868e+06	2.74317e+06	3.37986e+06	2.74939e+06	2.05792e+06	0.503364	0.646305	0.561422	1.30199	0.474738	0.728447	0	0	2	2	0	0	0	0	0	0	0	0
Transitional endoplasmic reticulum ATPase OS=Homo sapiens OX=9606 GN=VCP PE=1 SV=4	VCP	P55072	89324.8	Cytoplasm, cytosol {ECO:0000269|PubMed:15456787}. Endoplasmic reticulum {ECO:0000269|PubMed:15215856}. Nucleus {ECO:0000269|PubMed:23042605, ECO:0000269|PubMed:26842564}. Cytoplasm, Stress granule {ECO:0000269|PubMed:29804830}. Note=Present in the neuronal hyaline inclusion bodies specifically found in motor neurons from amyotrophic lateral sclerosis patients (PubMed:15456787). Present in the Lew…	Necessary for the fragmentation of Golgi stacks during mitosis and for their reassembly after mitosis. Involved in the formation of the transitional endoplasmic reticulum (tER). The transfer of membranes from the endoplasmic reticulum to the Golgi apparatus occurs via 50-70 nm transition vesicles which derive from part-rough, part-smooth transitional elements of the endoplasmic reticulum (tER). V…	0	1.36124e+07	1.37158e+07	1.33898e+07	2.16931e+07	2.21192e+07	2.25071e+07	4.89997e+06	1.19589e+07	4.30821e+07	1.1863e+07	1.09922e+07	2.53132e+07	0.703764	5.3298	0.557876	0.211892	0.242422	0.207192	10	9	9	11	14	11	3	0	19	0	5	10
Serine/Arginine-related protein 53 OS=Homo sapiens OX=9606 GN=RSRC1 PE=1 SV=1	RSRC1	Q96IZ7	38678.3	Nucleus {ECO:0000250}. Nucleus speckle {ECO:0000250}. Cytoplasm {ECO:0000250}. Note=Shuttles between the nucleus and cytoplasm. {ECO:0000250}.	Has a role in alternative splicing and transcription regulation (PubMed:29522154). Involved in both constitutive and alternative pre-mRNA splicing. May have a role in the recognition of the 3' splice site during the second step of splicing. {ECO:0000269|PubMed:15798186, ECO:0000269|PubMed:29522154}.	0	3.0028e+06	3.12758e+06	3.19352e+06	2.66342e+06	1.79012e+06	3.802e+06	3.80115e+06	6.75683e+06	3.15617e+06	4.84415e+06	2.46132e+06	586862	-0.175572	0.239842	0.55666	0.588797	-0.240483	0.143581	0	0	0	0	0	3	3	3	0	2	0	2
Coatomer subunit beta' OS=Homo sapiens OX=9606 GN=COPB2 PE=1 SV=2	COPB2	P35606	102489	Cytoplasm, cytosol {ECO:0000250}. Golgi apparatus membrane {ECO:0000250}; Peripheral membrane protein {ECO:0000250}; Cytoplasmic side {ECO:0000250}. Cytoplasmic vesicle, COPI-coated vesicle membrane {ECO:0000250}; Peripheral membrane protein {ECO:0000250}; Cytoplasmic side {ECO:0000250}. Note=The coatomer is cytoplasmic or polymerized on the cytoplasmic side of the Golgi, as well as on the vesicl…	The coatomer is a cytosolic protein complex that binds to dilysine motifs and reversibly associates with Golgi non-clathrin-coated vesicles, which further mediate biosynthetic protein transport from the ER, via the Golgi up to the trans Golgi network. Coatomer complex is required for budding from Golgi membranes, and is essential for the retrograde Golgi-to-ER transport of dilysine-tagged protein…	0	8.53994e+06	9.51551e+06	5.08215e+06	1.50068e+07	1.24556e+07	6.23468e+06	1.06159e+07	5.06203e+06	1.82768e+07	7.84578e+06	6.78598e+06	8.57986e+06	0.542388	0.528479	0.553373	0.37194	0.00460818	0.00560813	7	4	4	10	9	5	4	2	8	3	2	6
AP-3 complex subunit mu-1 OS=Homo sapiens OX=9606 GN=AP3M1 PE=1 SV=1	AP3M1	Q9Y2T2	46940	Golgi apparatus. Cytoplasmic vesicle membrane {ECO:0000250}; Peripheral membrane protein {ECO:0000250}; Cytoplasmic side {ECO:0000250}. Note=Component of the coat surrounding the cytoplasmic face of coated vesicles located at the Golgi complex. {ECO:0000250}.	Part of the AP-3 complex, an adaptor-related complex which is not clathrin-associated. The complex is associated with the Golgi region as well as more peripheral structures. It facilitates the budding of vesicles from the Golgi membrane and may be directly involved in trafficking to lysosomes. In concert with the BLOC-1 complex, AP-3 is required to target cargos into vesicles assembled at cell bo…	0	2.68607e+06	2.67215e+06	3.61272e+06	3.47852e+06	1.91596e+06	3.25111e+06	3.49739e+06	3.63844e+06	5.97449e+06	2.59504e+06	3.56486e+06	3.53171e+06	-0.0532972	0.0653187	0.54737	0.734089	0.111476	0.209096	0	0	0	0	0	0	0	0	2	0	0	0
Vesicle-associated membrane protein-associated protein A OS=Homo sapiens OX=9606 GN=VAPA PE=1 SV=3	VAPA	Q9P0L0	27893.9	Endoplasmic reticulum membrane {ECO:0000269|PubMed:10523508, ECO:0000269|PubMed:16143324, ECO:0000269|PubMed:19289470, ECO:0000269|PubMed:25447204, ECO:0000269|PubMed:30741634}; Single-pass type IV membrane protein {ECO:0000269|PubMed:10523508, ECO:0000269|PubMed:19289470}. Cell membrane {ECO:0000269|PubMed:25447204}; Single-pass type IV membrane protein {ECO:0000305}. Cell junction, tight juncti…	Binds to OSBPL3, which mediates recruitment of VAPA to plasma membrane sites (PubMed:25447204). The ORP3-VAPA complex stimulates RRAS signaling which in turn attenuates integrin beta-1 (ITGB1) activation at the cell surface (PubMed:25447204). With OSBPL3, may regulate ER morphology (PubMed:16143324). May play a role in vesicle trafficking (PubMed:11511104, PubMed:19289470). {ECO:0000269|PubMed:11…	TRANSMEM 228..248; /note="Helical; Anchor for type IV membrane protein"; /evidence="ECO:0000255"	2.7222e+06	2.18345e+06	2.33779e+06	4.34461e+06	2.90717e+06	2.88053e+06	3.85985e+06	3.68741e+06	3.03517e+06	2.84524e+06	2.81109e+06	4.31535e+06	0.484216	0.880282	0.546924	1.69503	0.461162	0.80725	0	0	0	4	0	0	0	0	0	0	0	0
Keratin, type I cytoskeletal 10 OS=Homo sapiens OX=9606 GN=KRT10 PE=1 SV=6	KRT10	P13645	58828.8	Secreted, extracellular space {ECO:0000269|PubMed:12427098}. Cell surface {ECO:0000269|PubMed:19627498}. Note=Localized on the surface of desquamated nasal epithelial cells (PubMed:12427098). Localized on the surface of lung cell lines (PubMed:19627498). {ECO:0000269|PubMed:12427098, ECO:0000269|PubMed:19627498}.	Plays a role in the establishment of the epidermal barrier on plantar skin. {ECO:0000250|UniProtKB:P02535}.; (Microbial infection) Acts as a mediator of S.aureus adherence to desquamated nasal epithelial cells via clfB, and hence may play a role in nasal colonization. {ECO:0000269|PubMed:15385531}.; (Microbial infection) Binds S.pneumoniae PsrP, mediating adherence of the bacteria to lung cell li…	0	1.48169e+08	1.40272e+08	1.41791e+08	1.24441e+08	1.52646e+08	1.08172e+08	4.35017e+08	1.02509e+08	9.08911e+07	203623292	6.59408e+08	1.17318e+08	-0.159284	0.494843	0.54661	0.229362	1.18818	0.47255	42	32	38	40	39	32	65	26	36	36	72	35
Low molecular weight phosphotyrosine protein phosphatase OS=Homo sapiens OX=9606 GN=ACP1 PE=1 SV=3	ACP1	P24666	18042.7	Cytoplasm.	Acts on tyrosine phosphorylated proteins, low-MW aryl phosphates and natural and synthetic acyl phosphates. Isoform 3 does not possess phosphatase activity.	0	2.45681e+06	3.20435e+06	1.90284e+06	3.49261e+06	2.6948e+06	2.80025e+06	2.10756e+06	4.95492e+06	3.97165e+06	2.47572e+06	2.17694e+06	2.45081e+06	0.248795	0.451558	0.544752	0.560127	-0.0906258	0.146734	0	0	0	0	0	0	0	0	3	0	0	0
Zinc finger protein 638 OS=Homo sapiens OX=9606 GN=ZNF638 PE=1 SV=2	ZNF638	Q14966	220626	Nucleus speckle {ECO:0000255|PROSITE-ProRule:PRU00130, ECO:0000269|PubMed:11813260, ECO:0000269|PubMed:8647861}.	Transcription factor that binds to cytidine clusters in double-stranded DNA (PubMed:8647861, PubMed:30487602). Plays a key role in the silencing of unintegrated retroviral DNA: some part of the retroviral DNA formed immediately after infection remains unintegrated in the host genome and is transcriptionally repressed (PubMed:30487602). Mediates transcriptional repression of unintegrated viral DNA…	0	1.70699e+06	2.27261e+06	1.3474e+06	2.0944e+06	1.83659e+06	1.79101e+06	1.61038e+06	3.03994e+06	3.11548e+06	2.50127e+06	2.6304e+06	2.93627e+06	0.103197	0.174904	0.54381	0.658773	0.598878	1.42412	0	0	2	0	0	0	0	0	0	0	0	0
Protein transport protein Sec24C OS=Homo sapiens OX=9606 GN=SEC24C PE=1 SV=3	SEC24C	P53992	118325	Cytoplasmic vesicle, COPII-coated vesicle membrane {ECO:0000269|PubMed:10075675, ECO:0000269|PubMed:10329445}; Peripheral membrane protein {ECO:0000269|PubMed:10075675}; Cytoplasmic side {ECO:0000269|PubMed:10075675}. Endoplasmic reticulum membrane {ECO:0000269|PubMed:10075675, ECO:0000269|PubMed:10329445}; Peripheral membrane protein {ECO:0000269|PubMed:10075675}; Cytoplasmic side {ECO:0000269|P…	Component of the coat protein complex II (COPII) which promotes the formation of transport vesicles from the endoplasmic reticulum (ER). The coat has two main functions, the physical deformation of the endoplasmic reticulum membrane into vesicles and the selection of cargo molecules for their transport to the Golgi complex (PubMed:10214955, PubMed:17499046, PubMed:18843296, PubMed:20427317). Play…	0	1.84787e+06	2.24929e+06	2.53991e+06	2.81741e+06	1.97996e+06	1.16768e+06	2.33414e+06	2.50425e+06	4.80098e+06	2.80041e+06	2.67822e+06	4.2149e+06	-0.154014	0.163026	0.53839	0.538348	0.546473	0.892125	2	0	2	0	2	2	0	0	4	0	0	3
ATPase family AAA domain-containing protein 3A OS=Homo sapiens OX=9606 GN=ATAD3A PE=1 SV=2	ATAD3A	Q9NVI7	71370.2	Mitochondrion inner membrane {ECO:0000269|PubMed:18063578, ECO:0000269|PubMed:20154147, ECO:0000269|PubMed:20332122, ECO:0000269|PubMed:20349121}; Single-pass membrane protein {ECO:0000269|PubMed:20154147, ECO:0000269|PubMed:20349121}. Mitochondrion matrix, mitochondrion nucleoid {ECO:0000269|PubMed:17210950, ECO:0000269|PubMed:18063578}. Note=In the mitochondrial inner membrane, enriched in site…	Essential for mitochondrial network organization, mitochondrial metabolism and cell growth at organism and cellular level. May play an important role in mitochondrial protein synthesis. May also participate in mitochondrial DNA replication. May bind to mitochondrial DNA D-loops and contribute to nucleoid stability. Required for enhanced channeling of cholesterol for hormone-dependent steroidogene…	TRANSMEM 295..312; /note="Helical"; /evidence="ECO:0000255"	3.93231e+07	6.79611e+07	4.76703e+07	2.34301e+07	4.46786e+07	5.30365e+07	6.98051e+07	9.82835e+07	5.65401e+07	7.38983e+07	6.37152e+07	7.7863e+07	-0.355107	0.387737	0.535699	0.708583	0.475687	0.997049	16	17	13	15	18	18	19	20	20	14	15	20
Guanine nucleotide-binding protein subunit beta-like protein 1 OS=Homo sapiens OX=9606 GN=GNB1L PE=1 SV=2	GNB1L	Q9BYB4	35617.6	0	0	0	2.16674e+06	1.86248e+06	1.72026e+06	1.80652e+06	2.21581e+06	2.24182e+06	3.18112e+06	3.29872e+06	1.84954e+06	3.2886e+06	2.50956e+06	2.14596e+06	0.123688	0.372554	0.534778	0.82506	0.466457	0.945834	0	0	0	0	2	0	0	0	0	0	0	0
Putative RNA-binding protein Luc7-like 2 OS=Homo sapiens OX=9606 GN=LUC7L2 PE=1 SV=2	LUC7L2	Q9Y383	46514.5	Nucleus speckle {ECO:0000250|UniProtKB:Q7TNC4}. Nucleus, nucleoplasm {ECO:0000250|UniProtKB:Q7TNC4}. Note=Colocalizes with SCNM1 and SNRNP70 in nuclear speckles. {ECO:0000250|UniProtKB:Q7TNC4}.	May bind to RNA via its Arg/Ser-rich domain.	0	8.61918e+06	1.68112e+07	1.02734e+07	9.54507e+06	1.11322e+07	1.26081e+07	1.89749e+07	2.07009e+07	1.20243e+07	3.20425e+07	1.5256e+07	2.13522e+07	-0.101185	0.10993	0.534092	0.662852	0.9432	0.932314	7	9	8	6	7	6	10	9	8	7	8	11
Nodal modulator 3 OS=Homo sapiens OX=9606 GN=NOMO3 PE=1 SV=2	NOMO3	P69849,Q5JPE7	134135	#N/A	#N/A	#N/A	6.65753e+06	3.51142e+06	3.32119e+06	1.14815e+07	8.07903e+06	7.80152e+06	6.46401e+06	5.67029e+06	7.36593e+06	1.15659e+07	4.55353e+06	4.13609e+06	1.02027	1.34855	0.531585	0.777598	0.586412	0.355169	7	3	4	9	8	7	4	5	5	3	3	3
Adipocyte plasma membrane-associated protein OS=Homo sapiens OX=9606 GN=APMAP PE=1 SV=2	APMAP	Q9HDC9	46481.5	Membrane {ECO:0000269|PubMed:18513186}; Single-pass type II membrane protein {ECO:0000269|PubMed:18513186}.	Exhibits strong arylesterase activity with beta-naphthyl acetate and phenyl acetate. May play a role in adipocyte differentiation. {ECO:0000269|PubMed:18513186}.	TRANSMEM 41..61; /note="Helical; Signal-anchor for type II membrane protein"; /evidence="ECO:0000255"	758910	823017	1.44602e+06	1.6098e+06	1.75446e+06	1.63502e+06	1.84001e+06	1.08962e+06	1.44729e+06	1.15658e+06	1.84767e+06	2.09399e+06	0.723377	1.37203	0.531574	0.66091	0.751657	0.904467	2	0	0	0	2	0	0	0	0	0	0	0
Cyclin-dependent kinase 4 OS=Homo sapiens OX=9606 GN=CDK4 PE=1 SV=2	CDK4	P11802	33730.1	Cytoplasm {ECO:0000269|PubMed:18827403}. Nucleus {ECO:0000269|PubMed:18827403, ECO:0000269|PubMed:20399237, ECO:0000269|PubMed:9106657}. Nucleus membrane {ECO:0000269|PubMed:18827403}. Note=Cytoplasmic when non-complexed. Forms a cyclin D-CDK4 complex in the cytoplasm as cells progress through G(1) phase. The complex accumulates on the nuclear membrane and enters the nucleus on transition from G(…	Ser/Thr-kinase component of cyclin D-CDK4 (DC) complexes that phosphorylate and inhibit members of the retinoblastoma (RB) protein family including RB1 and regulate the cell-cycle during G(1)/S transition. Phosphorylation of RB1 allows dissociation of the transcription factor E2F from the RB/E2F complexes and the subsequent transcription of E2F target genes which are responsible for the progressi…	0	4.45423e+06	5.23862e+06	3.57995e+06	1.23072e+07	1.37108e+07	5.73326e+06	4.34492e+06	3.00181e+06	1.18356e+07	9.57446e+06	1.52017e+07	1.63666e+07	1.25834	1.15625	0.531301	0.284773	1.63216	1.90452	3	4	4	3	4	4	3	2	5	4	5	4
Acyl-coenzyme A thioesterase 1 OS=Homo sapiens OX=9606 GN=ACOT1 PE=1 SV=1	ACOT1	Q86TX2	46278.2	Cytoplasm, cytosol {ECO:0000269|PubMed:16940157}.	Acyl-CoA thioesterases are a group of enzymes that catalyze the hydrolysis of acyl-CoAs into free fatty acids and coenzyme A (CoASH), regulating intracellular levels of acyl-CoAs, free fatty acids and CoASH. More active towards saturated and unsaturated long chain fatty acyl-CoAs (C12-C20). {ECO:0000269|PubMed:16940157}.	0	8.73263e+06	4.61889e+06	3.6094e+06	1.05377e+07	2.94742e+06	6.55692e+06	8.19747e+06	6.28827e+06	1.00012e+07	4.08437e+06	6.26267e+06	4.82582e+06	0.240811	0.141187	0.529797	0.590285	-0.16072	0.129325	5	2	2	5	4	5	4	4	7	2	3	2
Protein RRP5 homolog OS=Homo sapiens OX=9606 GN=PDCD11 PE=1 SV=3	PDCD11	Q14690	208703	Nucleus, nucleolus {ECO:0000269|PubMed:12429849, ECO:0000269|PubMed:14624448, ECO:0000269|PubMed:17654514}.	Essential for the generation of mature 18S rRNA, specifically necessary for cleavages at sites A0, 1 and 2 of the 47S precursor. Directly interacts with U3 snoRNA. {ECO:0000269|PubMed:17654514}.; Involved in the biogenesis of rRNA. {ECO:0000250}.	0	1.90215e+06	1.27082e+06	1.35335e+06	2.21073e+06	4.3923e+06	2.19697e+06	2.39611e+06	2.56246e+06	1.5746e+06	2.26064e+06	2.3815e+06	1.99514e+06	0.959166	0.877509	0.529447	0.853993	0.552256	1.43161	0	3	0	0	6	4	0	0	4	0	0	2
Nitric oxide synthase-interacting protein OS=Homo sapiens OX=9606 GN=NOSIP PE=1 SV=1	NOSIP	Q9Y314	33172	Cytoplasm {ECO:0000269|PubMed:15548660, ECO:0000269|PubMed:16135813}. Nucleus {ECO:0000269|PubMed:15548660, ECO:0000269|PubMed:16135813}. Note=Translocates from nucleus to cytoplasm in the G2 phase of the cell cycle (PubMed:16135813).	E3 ubiquitin-protein ligase that is essential for proper development of the forebrain, the eye, and the face. Catalyzes monoubiquitination of serine/threonine-protein phosphatase 2A (PP2A) catalytic subunit PPP2CA/PPP2CB (By similarity). Negatively regulates nitric oxide production by inducing NOS1 and NOS3 translocation to actin cytoskeleton and inhibiting their enzymatic activity (PubMed:111498…	0	694907	965792	1.67855e+06	1.42588e+06	1.5444e+06	1.56782e+06	910314	2.06811e+06	1.83721e+06	2.04864e+06	1.80398e+06	3.48027e+06	0.442562	0.603511	0.528203	0.462731	1.13486	1.04315	2	0	3	0	0	0	0	0	0	0	0	0
Apoptosis inhibitor 5 OS=Homo sapiens OX=9606 GN=API5 PE=1 SV=3	API5	Q9BZZ5	59006.8	Nucleus {ECO:0000269|PubMed:11075807}. Cytoplasm {ECO:0000269|PubMed:11075807}. Note=Mainly nuclear. Can also be cytoplasmic.; [Isoform 3]: Cytoplasm.	Antiapoptotic factor that may have a role in protein assembly. Negatively regulates ACIN1. By binding to ACIN1, it suppresses ACIN1 cleavage from CASP3 and ACIN1-mediated DNA fragmentation. Also known to efficiently suppress E2F1-induced apoptosis. Its depletion enhances the cytotoxic action of the chemotherapeutic drugs. {ECO:0000269|PubMed:10780674, ECO:0000269|PubMed:17112319, ECO:0000269|PubM…	0	1.94855e+06	3.02414e+06	4.75832e+06	2.62479e+06	2.87371e+06	2.25471e+06	7.38319e+06	3.67397e+06	2.95638e+06	3.38909e+06	4.30449e+06	4.28531e+06	-0.327796	0.322892	0.526159	0.374672	0.299832	0.357689	2	0	3	2	0	2	3	0	2	0	0	0
ER membrane protein complex subunit 3 OS=Homo sapiens OX=9606 GN=EMC3 PE=1 SV=3	EMC3	Q9P0I2	29953.2	Membrane {ECO:0000269|PubMed:22119785}; Multi-pass membrane protein {ECO:0000269|PubMed:22119785}.	0	TRANSMEM 14..34; /note="Helical"; /evidence="ECO:0000255"; TRANSMEM 118..138; /note="Helical"; /evidence="ECO:0000255"	2.14353e+06	1.67678e+06	2.18403e+06	1.68456e+06	2.14096e+06	2.61085e+06	3.01299e+06	3.41118e+06	2.21293e+06	2.99168e+06	2.30922e+06	2.99055e+06	0.100237	0.174315	0.524539	1.06266	0.465616	1.27899	0	0	0	0	0	2	0	0	0	0	0	0
U1 small nuclear ribonucleoprotein C OS=Homo sapiens OX=9606 GN=SNRPC PE=1 SV=1	SNRPC	P09234	17393.9	Nucleus {ECO:0000255|HAMAP-Rule:MF_03153, ECO:0000269|PubMed:2136774}.	Component of the spliceosomal U1 snRNP, which is essential for recognition of the pre-mRNA 5' splice-site and the subsequent assembly of the spliceosome. SNRPC/U1-C is directly involved in initial 5' splice-site recognition for both constitutive and regulated alternative splicing. The interaction with the 5' splice-site seems to precede base-pairing between the pre-mRNA and the U1 snRNA. Stimulat…	0	3.79034e+06	3.58913e+06	4.4535e+06	4.42721e+06	2.64617e+06	4.61151e+06	6.32476e+06	3.74931e+06	6.94418e+06	3.50919e+06	8.09557e+06	5.83062e+06	-0.0181676	0.0243242	0.524271	0.787862	0.559205	0.622286	0	0	0	0	0	0	2	0	0	0	2	2
Myristoylated alanine-rich C-kinase substrate OS=Homo sapiens OX=9606 GN=MARCKS PE=1 SV=4	MARCKS	P29966	31554.2	Cytoplasm, cytoskeleton {ECO:0000305}. Membrane {ECO:0000305}; Lipid-anchor {ECO:0000305}.	MARCKS is the most prominent cellular substrate for protein kinase C. This protein binds calmodulin, actin, and synapsin. MARCKS is a filamentous (F) actin cross-linking protein.	0	1.01715e+06	1.16571e+06	486503	1.03032e+06	1.76905e+06	1.12428e+06	1.58162e+06	1.53326e+06	722350	3.01531e+06	1.71054e+06	980850	0.5557	0.603173	0.523567	0.489043	1.09616	0.737095	3	2	2	3	4	3	3	3	3	4	3	3
Bifunctional methylenetetrahydrofolate dehydrogenase/cyclohydrolase, mitochondrial OS=Homo sapiens OX=9606 GN=MTHFD2 PE=1 SV=2	MTHFD2	P13995	37895.1	Mitochondrion.	Although its dehydrogenase activity is NAD-specific, it can also utilize NADP at a reduced efficiency. {ECO:0000269|PubMed:16100107}.	0	4.73342e+06	3.14922e+06	2.40412e+06	3.32986e+06	6.18586e+06	6.17713e+06	4.2176e+06	5.4831e+06	5.08194e+06	4.36963e+06	3.93532e+06	4.51678e+06	0.609319	0.700733	0.523116	0.893793	0.317802	0.524333	3	2	2	3	4	3	3	3	3	0	2	0
T-complex protein 1 subunit theta OS=Homo sapiens OX=9606 GN=CCT8 PE=1 SV=4	CCT8	P50990	59621	Cytoplasm {ECO:0000269|PubMed:20080638}. Cytoplasm, cytoskeleton, microtubule organizing center, centrosome {ECO:0000269|PubMed:14654843, ECO:0000269|PubMed:20080638}. Cytoplasm, cytoskeleton, cilium basal body {ECO:0000250|UniProtKB:P42932}.	Component of the chaperonin-containing T-complex (TRiC), a molecular chaperone complex that assists the folding of proteins upon ATP hydrolysis (PubMed:25467444). The TRiC complex mediates the folding of WRAP53/TCAB1, thereby regulating telomere maintenance (PubMed:25467444). As part of the TRiC complex may play a role in the assembly of BBSome, a complex involved in ciliogenesis regulating trans…	0	4.34079e+07	3.29071e+07	3.32808e+07	34624933	2.55876e+07	4.24744e+07	5.82544e+07	5.88444e+07	4.03933e+07	6.14802e+07	5.50064e+07	3.41601e+07	-0.0939392	0.143094	0.523087	1.0778	0.458976	0.6984	14	12	17	13	13	15	16	13	13	11	12	10
40S ribosomal protein S8 OS=Homo sapiens OX=9606 GN=RPS8 PE=1 SV=2	RPS8	P62241	24206.4	Cytoplasm {ECO:0000269|PubMed:17289661}. Membrane {ECO:0000305}; Lipid-anchor {ECO:0000305}. Note=Localized in cytoplasmic mRNP granules containing untranslated mRNAs.	0	0	3.14371e+07	2.68827e+07	2.34732e+07	2.80345e+07	2.18991e+07	3.14039e+07	4.32486e+07	2.76069e+07	4.65352e+07	4.19252e+07	3.19935e+07	5.0324e+07	-0.00805522	0.0138958	0.521269	0.88022	0.603112	1.1516	8	7	6	7	7	8	8	8	8	7	7	8
Pre-mRNA-splicing factor ATP-dependent RNA helicase DHX15 OS=Homo sapiens OX=9606 GN=DHX15 PE=1 SV=2	DHX15	O43143	90935.2	Nucleus. Nucleus, nucleolus.	Pre-mRNA processing factor involved in disassembly of spliceosomes after the release of mature mRNA. In cooperation with TFIP11 seem to be involved in the transition of the U2, U5 and U6 snRNP-containing IL complex to the snRNP-free IS complex leading to efficient debranching and turnover of excised introns. {ECO:0000269|PubMed:19103666}.	0	2.30799e+07	3.15971e+07	2.83269e+07	3.43682e+07	3.26521e+07	2.64959e+07	4.44982e+07	3.33487e+07	4.1245e+07	6.25217e+07	3.92863e+07	8.10272e+07	0.172037	0.435854	0.520824	1.35886	1.13929	1.26659	10	13	14	13	16	17	9	10	20	14	11	20
Regulation of nuclear pre-mRNA domain-containing protein 2 OS=Homo sapiens OX=9606 GN=RPRD2 PE=1 SV=1	RPRD2	Q5VT52	156023	0	0	0	3.006e+06	2.69102e+06	3.13701e+06	3.25058e+06	5.11946e+06	3.87305e+06	3.44066e+06	3.94207e+06	5.27254e+06	4.60929e+06	3.68837e+06	3.5114e+06	0.470825	0.940425	0.518593	1.06446	0.41875	1.27393	0	0	0	0	0	0	0	0	0	0	0	3
Tubulin alpha-1B chain OS=Homo sapiens OX=9606 GN=TUBA1B PE=1 SV=1	TUBA1B	P68363	50151.7	Cytoplasm, cytoskeleton.	Tubulin is the major constituent of microtubules. It binds two moles of GTP, one at an exchangeable site on the beta chain and one at a non-exchangeable site on the alpha chain.	0	3.66956e+08	382642224	3.87679e+08	4.4662e+08	4.21323e+08	3.88563e+08	4.75586e+08	7.53898e+08	3.99452e+08	4.42228e+08	373449796	4.6807e+08	0.143834	1.04134	0.518347	0.691577	0.174779	0.778296	56	48	60	54	46	46	39	44	54	29	35	37
Four and a half LIM domains protein 1 OS=Homo sapiens OX=9606 GN=FHL1 PE=1 SV=4	FHL1	Q13642	36262	[Isoform 1]: Cytoplasm.; [Isoform 3]: Cytoplasm. Nucleus.; [Isoform 2]: Nucleus. Cytoplasm, cytosol. Note=Predominantly nuclear in myoblasts but is cytosolic in differentiated myotubes.	May have an involvement in muscle development or hypertrophy.	0	1.84782e+06	2.52184e+06	2.21207e+06	2.25436e+06	2.10048e+06	2.2359e+06	3.71984e+06	3.02531e+06	2.66201e+06	4.42075e+06	2.42431e+06	2.70446e+06	0.00197403	0.00490172	0.515292	1.20801	0.536961	0.688725	0	0	0	2	0	2	0	0	0	0	0	2
Mitochondrial import receptor subunit TOM70 OS=Homo sapiens OX=9606 GN=TOMM70 PE=1 SV=1	TOMM70	O94826	67457.2	Mitochondrion outer membrane {ECO:0000250}; Single-pass membrane protein {ECO:0000250}.	Receptor that accelerates the import of all mitochondrial precursor proteins. {ECO:0000250}.	TRANSMEM 39..59; /note="Helical"; /evidence="ECO:0000255"	8.78017e+06	1.68089e+07	8.38876e+06	1.09997e+07	1.19047e+07	1.84531e+07	1.39935e+07	2.45551e+07	1.00095e+07	8.08501e+06	1.48839e+07	1.00353e+07	0.283552	0.273127	0.515119	0.400719	-0.0419433	0.032119	6	8	6	7	8	11	8	9	5	3	9	5
decoy_sp|Q8IWI9|MGAP_HUMAN	#VALUE!	decoy_sp|Q8IWI9|MGAP_HUMAN	0	#N/A	#N/A	#N/A	4.26515e+06	2.92225e+06	3.99392e+06	3.69288e+06	4.93856e+06	6.75779e+06	3.27042e+06	2.77727e+06	9.8873e+06	7.60404e+06	2.78169e+06	4.30286e+06	0.460831	0.646795	0.511107	0.27282	0.393606	0.324127	0	0	0	0	0	0	0	0	0	0	0	0
Spartin OS=Homo sapiens OX=9606 GN=SPART PE=1 SV=1	SPART	Q8N0X7	72832.5	Cytoplasm {ECO:0000269|PubMed:19580544}. Midbody {ECO:0000269|PubMed:20719964}. Note=Transiently associated with endosomes (PubMed:19580544). Colocalized with IST1 to the ends of Flemming bodies during cytokinesis (PubMed:20719964). {ECO:0000269|PubMed:19580544, ECO:0000269|PubMed:20719964}.	May be implicated in endosomal trafficking, or microtubule dynamics, or both. Participates in cytokinesis (PubMed:20719964). {ECO:0000269|PubMed:20719964}.	0	550646	720092	302878	423502	334532	690147	667928	740730	819077	1.48382e+06	585072	865682	-0.119842	0.0923064	0.501494	0.780806	0.899067	0.709945	0	0	2	0	2	0	0	0	0	0	0	0
Succinate--CoA ligase [GDP-forming] subunit beta, mitochondrial OS=Homo sapiens OX=9606 GN=SUCLG2 PE=1 SV=2	SUCLG2	Q96I99	46511.7	Mitochondrion {ECO:0000255|HAMAP-Rule:MF_03221}.	GTP-specific succinyl-CoA synthetase functions in the citric acid cycle (TCA), coupling the hydrolysis of succinyl-CoA to the synthesis of GTP and thus represents the only step of substrate-level phosphorylation in the TCA. The beta subunit provides nucleotide specificity of the enzyme and binds the substrate succinate, while the binding sites for coenzyme A and phosphate are found in the alpha s…	0	2.40942e+06	3.13374e+06	4.3061e+06	3.59709e+06	6.41833e+06	7.06625e+06	4.77076e+06	4.26738e+06	4.88977e+06	4.63151e+06	3.31761e+06	2.40317e+06	0.794363	0.939748	0.499892	1.09348	0.0718644	0.0688768	2	0	3	3	4	3	0	2	3	0	0	2
Endoplasmic reticulum chaperone BiP OS=Homo sapiens OX=9606 GN=HSPA5 PE=1 SV=2	HSPA5	P11021	72334.7	Endoplasmic reticulum lumen {ECO:0000269|PubMed:21080038, ECO:0000269|PubMed:21289099, ECO:0000269|PubMed:23990668, ECO:0000269|PubMed:29497057}. Melanosome {ECO:0000269|PubMed:12643545}. Cytoplasm {ECO:0000250|UniProtKB:P20029}. Note=Identified by mass spectrometry in melanosome fractions from stage I to stage IV. {ECO:0000269|PubMed:12643545}.	Endoplasmic reticulum chaperone that plays a key role in protein folding and quality control in the endoplasmic reticulum lumen (PubMed:2294010, PubMed:23769672, PubMed:23990668, PubMed:28332555). Involved in the correct folding of proteins and degradation of misfolded proteins via its interaction with DNAJC10/ERdj5, probably to facilitate the release of DNAJC10/ERdj5 from its substrate (By simil…	0	3.14471e+07	3.51086e+07	3.79163e+07	5.09144e+07	4.82945e+07	6.44311e+07	2.93704e+07	6.08728e+07	5.71407e+07	5.84651e+07	3.63917e+07	5.3178e+07	0.647408	1.67894	0.496462	0.638048	0.50282	0.984738	15	15	14	19	19	22	12	13	20	12	14	16
39S ribosomal protein L12, mitochondrial OS=Homo sapiens OX=9606 GN=MRPL12 PE=1 SV=2	MRPL12	P52815	21348.4	Mitochondrion {ECO:0000269|PubMed:8626705}.	Associates with mitochondrial RNA polymerase to activate transcription. {ECO:0000269|PubMed:22003127}.	0	2.86214e+06	3.48793e+06	1.81457e+06	2.50037e+06	3.74813e+06	4.12749e+06	5.17848e+06	4.75619e+06	1.54188e+06	4.22645e+06	2.95274e+06	4.45543e+06	0.34579	0.459349	0.491229	0.370322	0.510964	0.790023	0	0	2	2	2	3	2	2	3	0	0	0
Sec1 family domain-containing protein 1 OS=Homo sapiens OX=9606 GN=SCFD1 PE=1 SV=4	SCFD1	Q8WVM8	72382.3	Cytoplasm {ECO:0000250}. Endoplasmic reticulum membrane {ECO:0000250}; Peripheral membrane protein {ECO:0000250}. Golgi apparatus, Golgi stack membrane {ECO:0000250}; Peripheral membrane protein {ECO:0000250}.	Plays a role in SNARE-pin assembly and Golgi-to-ER retrograde transport via its interaction with COG4. Involved in vesicular transport between the endoplasmic reticulum and the Golgi (By similarity). {ECO:0000250}.	0	4.62707e+06	6.2932e+06	1.20267e+07	5.29843e+06	8.24189e+06	9.41093e+06	1.01363e+07	1.02711e+07	1.18253e+07	4.83594e+06	3.89616e+06	2.64397e+06	0.000266485	0.000180292	0.49022	0.601054	-1.0123	0.761724	4	4	6	4	6	4	5	5	9	2	3	2
Kinesin light chain 2 OS=Homo sapiens OX=9606 GN=KLC2 PE=1 SV=1	KLC2	Q9H0B6	68936.2	Cytoplasm, cytoskeleton {ECO:0000305}.	Kinesin is a microtubule-associated force-producing protein that may play a role in organelle transport. The light chain may function in coupling of cargo to the heavy chain or in the modulation of its ATPase activity (By similarity). {ECO:0000250}.	0	1.50625e+06	1.47157e+06	814284	1.32159e+06	1.3433e+06	899463	2.00132e+06	1.75583e+06	1.56891e+06	1.11401e+06	1.48273e+06	1.29148e+06	-0.0893613	0.102035	0.490069	0.927716	0.0361099	0.0439108	0	0	2	0	0	0	0	0	0	0	0	0
Isocitrate dehydrogenase [NADP], mitochondrial OS=Homo sapiens OX=9606 GN=IDH2 PE=1 SV=2	IDH2	P48735	50910.4	Mitochondrion.	Plays a role in intermediary metabolism and energy production. It may tightly associate or interact with the pyruvate dehydrogenase complex.	0	1.16613e+07	1.25576e+07	1.2108e+07	1.40793e+07	1.44077e+07	1.47604e+07	1.72703e+07	1.60443e+07	1.76873e+07	1.1373e+07	1.66538e+07	1.52566e+07	0.251575	2.68179	0.489513	3.03331	0.252776	0.655521	7	6	8	7	10	7	8	7	8	4	8	9
Zinc finger protein 281 OS=Homo sapiens OX=9606 GN=ZNF281 PE=1 SV=1	ZNF281	Q9Y2X9	96915.4	Nucleus {ECO:0000269|PubMed:10448078}.	Transcription repressor that plays a role in regulation of embryonic stem cells (ESCs) differentiation. Required for ESCs differentiation and acts by mediating autorepression of NANOG in ESCs: binds to the NANOG promoter and promotes association of NANOG protein to its own promoter and recruits the NuRD complex, which deacetylates histones. Not required for establishement and maintenance of ESCs …	0	414301	516420	751954	674303	854042	744656	749121	592679	1.01804e+06	828112	705004	1.56607e+06	0.433841	0.806608	0.487929	0.638621	0.881132	0.756721	2	2	0	0	0	0	0	0	0	0	0	0
Creatine kinase B-type OS=Homo sapiens OX=9606 GN=CKB PE=1 SV=1	CKB	P12277	42645.1	Cytoplasm.	Reversibly catalyzes the transfer of phosphate between ATP and various phosphogens (e.g. creatine phosphate). Creatine kinase isoenzymes play a central role in energy transduction in tissues with large, fluctuating energy demands, such as skeletal muscle, heart, brain and spermatozoa.	0	1.12442e+07	1.47681e+07	1.88072e+07	1.36455e+07	1.92824e+07	1.89653e+07	1.68527e+07	1.62838e+07	2.96939e+07	1.21009e+07	6.65052e+06	1.41233e+07	0.211416	0.342547	0.487336	0.541928	-0.447147	0.566431	4	5	9	8	9	7	0	0	13	0	2	8
60S ribosomal protein L24 OS=Homo sapiens OX=9606 GN=RPL24 PE=1 SV=1	RPL24	P83731	17779.5	0	0	0	1.59605e+07	1.51687e+07	3.86801e+06	6.5751e+06	1.15695e+07	6.6493e+06	1.67485e+07	1.66467e+07	1.56456e+07	1.80841e+07	7.0707e+06	1.17638e+07	-0.497254	0.330223	0.486746	0.525021	0.0771092	0.0433168	3	3	2	2	3	2	3	3	3	3	2	3
Tubulin alpha-1C chain OS=Homo sapiens OX=9606 GN=TUBA1C PE=1 SV=1	TUBA1C	Q9BQE3	49895.5	Cytoplasm, cytoskeleton.	Tubulin is the major constituent of microtubules. It binds two moles of GTP, one at an exchangeable site on the beta chain and one at a non-exchangeable site on the alpha chain.	0	3.61567e+08	3.75713e+08	3.69406e+08	4.14644e+08	3.89559e+08	3.79902e+08	4.62566e+08	6.95585e+08	3.91438e+08	4.22324e+08	3.63081e+08	4.32551e+08	0.0975499	1.08985	0.48564	0.736104	0.138217	0.775588	54	46	56	50	45	41	34	40	46	25	31	33
Enoyl-CoA hydratase, mitochondrial OS=Homo sapiens OX=9606 GN=ECHS1 PE=1 SV=4	ECHS1	P30084	31388.2	Mitochondrion matrix.	Straight-chain enoyl-CoA thioesters from C4 up to at least C16 are processed, although with decreasing catalytic rate. Has high substrate specificity for crotonyl-CoA and moderate specificity for acryloyl-CoA, 3-methylcrotonyl-CoA and methacrylyl-CoA. It is noteworthy that binds tiglyl-CoA, but hydrates only a small amount of this substrate. {ECO:0000269|PubMed:26251176}.	0	1.00539e+07	1.9449e+07	9.67856e+06	8.44835e+06	1.90719e+07	1.26463e+07	1.58555e+07	2.42091e+07	1.47837e+07	4.80185e+06	1.43683e+07	1.6859e+07	0.0358228	0.0247248	0.485278	0.525756	-0.121007	0.0758561	4	6	6	5	5	5	5	5	6	2	4	4
Importin subunit beta-1 OS=Homo sapiens OX=9606 GN=KPNB1 PE=1 SV=2	KPNB1	Q14974	97171.3	Cytoplasm {ECO:0000269|PubMed:11891849}. Nucleus envelope {ECO:0000269|PubMed:11891849}.	Functions in nuclear protein import, either in association with an adapter protein, like an importin-alpha subunit, which binds to nuclear localization signals (NLS) in cargo substrates, or by acting as autonomous nuclear transport receptor. Acting autonomously, serves itself as NLS receptor. Docking of the importin/substrate complex to the nuclear pore complex (NPC) is mediated by KPNB1 through …	0	2.03506e+07	2.7762e+07	1.53949e+07	2.35893e+07	2.49091e+07	3.05527e+07	3.07223e+07	3.16242e+07	2.65105e+07	3.44222e+07	2.32039e+07	1.98661e+07	0.31586	0.548347	0.484562	1.01055	0.287126	0.339023	16	19	16	19	19	18	16	16	17	13	12	18
Transmembrane emp24 domain-containing protein 5 OS=Homo sapiens OX=9606 GN=TMED5 PE=1 SV=1	TMED5	Q9Y3A6	26005.8	Endoplasmic reticulum membrane {ECO:0000269|PubMed:19948005}; Single-pass type I membrane protein {ECO:0000269|PubMed:19948005}. Golgi apparatus, cis-Golgi network membrane {ECO:0000269|PubMed:19948005}; Single-pass type I membrane protein {ECO:0000269|PubMed:19948005}. Endoplasmic reticulum-Golgi intermediate compartment membrane {ECO:0000269|PubMed:19948005}; Single-pass type I membrane protein…	Potential role in vesicular protein trafficking, mainly in the early secretory pathway. Required for the maintenance of the Golgi apparatus; involved in protein exchange between Golgi stacks during assembly. Probably not required for COPI-vesicle-mediated retrograde transport. {ECO:0000269|PubMed:19948005}.	TRANSMEM 197..217; /note="Helical"; /evidence="ECO:0000255"	995631	1.69166e+06	2.15798e+06	2.08277e+06	1.85885e+06	1.9118e+06	2.10993e+06	2.58863e+06	2.07796e+06	2.17976e+06	2.06367e+06	2.20498e+06	0.272702	0.415157	0.483966	0.790516	0.412365	0.717491	2	0	2	0	2	2	0	0	0	0	0	0
Luc7-like protein 3 OS=Homo sapiens OX=9606 GN=LUC7L3 PE=1 SV=2	LUC7L3	O95232	51467.1	Nucleus speckle {ECO:0000269|PubMed:10631324, ECO:0000269|PubMed:12565863}. Note=The subnuclear localization is affected by cisplatin.	Binds cAMP regulatory element DNA sequence. May play a role in RNA splicing. {ECO:0000269|PubMed:16462885}.	0	3.17866e+06	2.87528e+06	2.69167e+06	4.97173e+06	3.88979e+06	5.27217e+06	4.17105e+06	5.49533e+06	2.56245e+06	5.32702e+06	4.87783e+06	4.92829e+06	0.692506	1.8114	0.483654	0.605152	0.791079	3.34843	3	3	3	4	3	4	3	4	3	3	3	5
Keratin, type II cytoskeletal 5 OS=Homo sapiens OX=9606 GN=KRT5 PE=1 SV=3	KRT5	P13647	62379.6	0	0	0	3.42223e+07	1.00229e+07	2.63386e+07	1.19846e+07	1.88569e+07	6.52516e+06	7.25823e+07	1.56247e+07	1.03675e+07	4.38294e+07	9.3221e+07	1.19063e+07	-0.917583	0.625174	0.481878	0.166223	1.07748	0.456042	17	6	13	9	13	5	21	8	8	14	23	7
U4/U6 small nuclear ribonucleoprotein Prp3 OS=Homo sapiens OX=9606 GN=PRPF3 PE=1 SV=2	PRPF3	O43395	77530.7	Nucleus {ECO:0000269|PubMed:17932117, ECO:0000269|PubMed:26912367, ECO:0000269|PubMed:28781166, ECO:0000269|PubMed:9328476, ECO:0000269|PubMed:9404889}. Nucleus speckle.	Plays role in pre-mRNA splicing as component of the U4/U6-U5 tri-snRNP complex that is involved in spliceosome assembly, and as component of the precatalytic spliceosome (spliceosome B complex). {ECO:0000269|PubMed:26912367, ECO:0000269|PubMed:28781166, ECO:0000305|PubMed:20595234}.	0	4.48159e+06	3.55784e+06	6.65058e+06	6.81272e+06	6.26773e+06	1.23921e+07	7.03115e+06	5.71426e+06	7.75679e+06	7.96066e+06	6.69303e+06	7.78388e+06	0.794105	0.765476	0.480943	0.819971	0.611081	1.21511	2	2	4	4	3	5	0	0	3	0	2	3
Protein transport protein Sec24B OS=Homo sapiens OX=9606 GN=SEC24B PE=1 SV=2	SEC24B	O95487	137419	Cytoplasmic vesicle, COPII-coated vesicle membrane {ECO:0000269|PubMed:10075675}; Peripheral membrane protein {ECO:0000305|PubMed:10075675}; Cytoplasmic side {ECO:0000305|PubMed:10075675}. Endoplasmic reticulum membrane {ECO:0000269|PubMed:10075675}; Peripheral membrane protein {ECO:0000269|PubMed:10075675}; Cytoplasmic side {ECO:0000269|PubMed:10075675}. Cytoplasm, cytosol {ECO:0000269|PubMed:10…	Component of the coat protein complex II (COPII) which promotes the formation of transport vesicles from the endoplasmic reticulum (ER). The coat has two main functions, the physical deformation of the endoplasmic reticulum membrane into vesicles and the selection of cargo molecules for their transport to the Golgi complex (PubMed:17499046, PubMed:20427317, PubMed:18843296). Plays a central role …	0	2.60915e+06	2.11561e+06	1.5479e+06	2.13041e+06	2.23246e+06	1.96966e+06	2.93551e+06	2.94646e+06	2.86956e+06	1.98466e+06	2.34629e+06	2.18083e+06	0.0137036	0.021054	0.480457	1.26087	0.0539731	0.0873793	0	0	2	0	0	0	0	0	0	0	0	0
Vacuolar protein sorting-associated protein 26A OS=Homo sapiens OX=9606 GN=VPS26A PE=1 SV=2	VPS26A	O75436	38171.2	Cytoplasm {ECO:0000269|PubMed:15078903}. Endosome membrane {ECO:0000269|PubMed:22431521}; Peripheral membrane protein {ECO:0000250|UniProtKB:P40336}. Early endosome {ECO:0000269|PubMed:15078903, ECO:0000269|PubMed:16190980, ECO:0000269|PubMed:16732284, ECO:0000269|PubMed:20682791}. Note=Localizes to tubular profiles adjacent to endosomes (PubMed:15078903). Predominantly found in early not late en…	Acts as component of the retromer cargo-selective complex (CSC). The CSC is believed to be the core functional component of retromer or respective retromer complex variants acting to prevent missorting of selected transmembrane cargo proteins into the lysosomal degradation pathway. The recruitment of the CSC to the endosomal membrane involves RAB7A and SNX3. The SNX-BAR retromer mediates retrogra…	0	3.41764e+06	4.48413e+06	3.22776e+06	6.2911e+06	4.63652e+06	4.22919e+06	3.88677e+06	5.54183e+06	6.09452e+06	4.29549e+06	4.83332e+06	4.79408e+06	0.445574	0.839734	0.480025	0.886317	0.323066	1.02223	2	0	2	2	0	2	0	0	3	0	0	0
Ubiquitin carboxyl-terminal hydrolase 5 OS=Homo sapiens OX=9606 GN=USP5 PE=1 SV=2	USP5	P45974	95788.1	0	Cleaves linear and branched multiubiquitin polymers with a marked preference for branched polymers. Involved in unanchored 'Lys-48'-linked polyubiquitin disassembly. Binds linear and 'Lys-63'-linked polyubiquitin with a lower affinity. Knock-down of USP5 causes the accumulation of p53/TP53 and an increase in p53/TP53 transcriptional activity because the unanchored polyubiquitin that accumulates i…	0	2.44361e+06	2.57274e+06	2.73109e+06	2.20577e+06	3.88274e+06	2.64371e+06	4.72154e+06	3.23592e+06	2.84658e+06	4.0415e+06	3.04128e+06	3.73212e+06	0.172628	0.256399	0.479779	0.817199	0.481228	1.53572	0	0	0	0	0	0	0	0	2	0	0	0
Glucose-6-phosphate 1-dehydrogenase OS=Homo sapiens OX=9606 GN=G6PD PE=1 SV=4	G6PD	P11413	59258.1	Cytoplasm, cytosol {ECO:0000269|PubMed:743300}. Membrane; Peripheral membrane protein {ECO:0000269|PubMed:743300}.	Cytosolic glucose-6-phosphate dehydrogenase that catalyzes the first and rate-limiting step of the oxidative branch within the pentose phosphate pathway/shunt, an alternative route to glycolysis for the dissimilation of carbohydrates and a major source of reducing power and metabolic intermediates for fatty acid and nucleic acid biosynthetic processes. {ECO:0000269|PubMed:15858258, ECO:0000269|Pu…	0	4.36364e+06	2.08449e+06	2.59671e+06	5.57969e+06	4.97103e+06	3.6514e+06	3.32409e+06	3.53014e+06	5.72197e+06	3.4532e+06	3.92477e+06	2.94313e+06	0.650938	0.895965	0.475528	0.49793	0.190429	0.222472	3	2	2	3	3	2	0	0	6	0	0	2
Rab GDP dissociation inhibitor beta OS=Homo sapiens OX=9606 GN=GDI2 PE=1 SV=2	GDI2	P50395	50665.5	Cytoplasm {ECO:0000250}. Membrane {ECO:0000250}; Peripheral membrane protein {ECO:0000250}.	Regulates the GDP/GTP exchange reaction of most Rab proteins by inhibiting the dissociation of GDP from them, and the subsequent binding of GTP to them.	0	1.71016e+06	2.75935e+06	3.11909e+06	6.62704e+06	4.92254e+06	3.98295e+06	1.49822e+06	3.04006e+06	6.00759e+06	3.18522e+06	2.71765e+06	1.26023e+06	1.03339	1.3999	0.474773	0.286419	-0.0832483	0.0690936	3	2	5	10	5	6	2	0	7	0	0	3
Sorting nexin-6 OS=Homo sapiens OX=9606 GN=SNX6 PE=1 SV=1	SNX6	Q9UNH7	46650.4	Early endosome {ECO:0000269|PubMed:11485546, ECO:0000269|PubMed:17148574, ECO:0000269|PubMed:19935774}. Early endosome membrane {ECO:0000269|PubMed:19935774, ECO:0000303|PubMed:11485546}; Peripheral membrane protein {ECO:0000269|PubMed:11485546}; Cytoplasmic side {ECO:0000305}. Cytoplasmic vesicle {ECO:0000269|PubMed:20354142}. Cytoplasm {ECO:0000269|PubMed:20830743}. Nucleus {ECO:0000269|PubMed:…	Involved in several stages of intracellular trafficking. Interacts with membranes phosphatidylinositol 3,4-bisphosphate and/or phosphatidylinositol 4,5-bisphosphate (Probable). Acts in part as component of the retromer membrane-deforming SNX-BAR subcomplex (PubMed:19935774). The SNX-BAR retromer mediates retrograde transport of cargo proteins from endosomes to the trans-Golgi network (TGN) and is…	0	1.15203e+06	1.68486e+06	1.21565e+06	1.97176e+06	1.40883e+06	1.18363e+06	1.99181e+06	2.07021e+06	1.56549e+06	1.17031e+06	1.45246e+06	2.59091e+06	0.171542	0.232086	0.473672	1.07374	0.363476	0.344342	2	0	0	0	0	0	0	0	0	0	0	0
Cofilin-1 OS=Homo sapiens OX=9606 GN=CFL1 PE=1 SV=3	CFL1	P23528	18503.2	Nucleus matrix {ECO:0000269|PubMed:15580268}. Cytoplasm, cytoskeleton {ECO:0000269|PubMed:15580268}. Cell projection, ruffle membrane {ECO:0000269|PubMed:15580268}; Peripheral membrane protein {ECO:0000269|PubMed:15580268}; Cytoplasmic side {ECO:0000269|PubMed:15580268}. Cell projection, lamellipodium membrane {ECO:0000269|PubMed:15580268}; Peripheral membrane protein {ECO:0000269|PubMed:15580268…	Binds to F-actin and exhibits pH-sensitive F-actin depolymerizing activity. Regulates actin cytoskeleton dynamics. Important for normal progress through mitosis and normal cytokinesis. Plays a role in the regulation of cell morphology and cytoskeletal organization. Required for the up-regulation of atypical chemokine receptor ACKR2 from endosomal compartment to cell membrane, increasing its effic…	0	8.168e+06	2.4747e+06	6.26466e+06	5.53563e+06	6.77082e+06	7.90602e+06	5.6125e+06	1.14212e+07	6.44168e+06	5.20502e+06	7.13899e+06	3.55347e+06	0.257594	0.240191	0.473498	0.371488	-0.0888535	0.0592362	6	3	6	3	5	5	3	6	5	0	3	4
Cyclin-dependent kinase 1 OS=Homo sapiens OX=9606 GN=CDK1 PE=1 SV=3	CDK1	P06493	34097.3	Nucleus. Cytoplasm. Mitochondrion. Cytoplasm, cytoskeleton, microtubule organizing center, centrosome {ECO:0000269|PubMed:14654843}. Cytoplasm, cytoskeleton, spindle. Note=Cytoplasmic during the interphase. Colocalizes with SIRT2 on centrosome during prophase and on splindle fibers during metaphase of the mitotic cell cycle. Reversibly translocated from cytoplasm to nucleus when phosphorylated be…	Plays a key role in the control of the eukaryotic cell cycle by modulating the centrosome cycle as well as mitotic onset; promotes G2-M transition, and regulates G1 progress and G1-S transition via association with multiple interphase cyclins. Required in higher cells for entry into S-phase and mitosis. Phosphorylates PARVA/actopaxin, APC, AMPH, APC, BARD1, Bcl-xL/BCL2L1, BRCA2, CALD1, CASP8, CDC…	0	4.68545e+06	3.51801e+06	4.10881e+06	1.10031e+07	6.41515e+06	6.94245e+06	4.68228e+06	3.99243e+06	8.39896e+06	5.85615e+06	5.10046e+06	1.40574e+07	0.984461	1.26631	0.471677	0.49068	1.02264	0.664571	0	2	0	3	0	0	0	0	3	0	0	3
Eukaryotic translation initiation factor 5 OS=Homo sapiens OX=9606 GN=EIF5 PE=1 SV=2	EIF5	P55010	49223.4	0	Catalyzes the hydrolysis of GTP bound to the 40S ribosomal initiation complex (40S.mRNA.Met-tRNA[F].eIF-2.GTP) with the subsequent joining of a 60S ribosomal subunit resulting in the release of eIF-2 and the guanine nucleotide. The subsequent joining of a 60S ribosomal subunit results in the formation of a functional 80S initiation complex (80S.mRNA.Met-tRNA[F]).	0	2.25573e+06	3.84454e+06	2.64315e+06	4.47142e+06	4.16988e+06	3.77241e+06	3.47064e+06	4.31099e+06	4.33425e+06	4.51023e+06	3.80297e+06	4.00815e+06	0.505663	1.10772	0.470628	0.945404	0.494888	1.07312	0	0	0	2	0	0	0	0	0	0	0	0
Keratin, type II cytoskeletal 1 OS=Homo sapiens OX=9606 GN=KRT1 PE=1 SV=6	KRT1	P04264	66040.3	Cell membrane {ECO:0000269|PubMed:17956333}. Note=Located on plasma membrane of neuroblastoma NMB7 cells.	May regulate the activity of kinases such as PKC and SRC via binding to integrin beta-1 (ITB1) and the receptor of activated protein C kinase 1 (RACK1). In complex with C1QBP is a high affinity receptor for kininogen-1/HMWK. {ECO:0000269|PubMed:17956333, ECO:0000269|PubMed:21544310}.	0	3.17049e+08	1.24527e+08	233280698	1.98166e+08	1.43124e+08	1.50994e+08	6.28083e+08	159403615	1.47484e+08	3.37426e+08	9.48975e+08	2.01075e+08	-0.455092	0.448994	0.470341	0.198894	1.14021	0.500092	55	30	48	43	44	34	63	37	38	36	91	35
Coronin-1C OS=Homo sapiens OX=9606 GN=CORO1C PE=1 SV=1	CORO1C	Q9ULV4	53250.3	Cell membrane {ECO:0000269|PubMed:12377779, ECO:0000269|PubMed:19651142, ECO:0000269|PubMed:25074804, ECO:0000269|PubMed:25925950}; Peripheral membrane protein {ECO:0000269|PubMed:19651142, ECO:0000269|PubMed:25074804, ECO:0000269|PubMed:25925950}; Cytoplasmic side {ECO:0000269|PubMed:19651142, ECO:0000269|PubMed:25074804, ECO:0000269|PubMed:25925950}. Cell projection, lamellipodium {ECO:0000269|…	Plays a role in directed cell migration by regulating the activation and subcellular location of RAC1 (PubMed:25074804, PubMed:25925950). Increases the presence of activated RAC1 at the leading edge of migrating cells (PubMed:25074804, PubMed:25925950). Required for normal organization of the cytoskeleton, including the actin cytoskeleton, microtubules and the vimentin intermediate filaments (By …	0	3.96978e+06	4.38047e+06	2.99526e+06	4.16675e+06	4.80547e+06	3.13108e+06	3.69568e+06	6.94042e+06	5.08213e+06	5.93311e+06	5.33936e+06	4.15248e+06	0.0932793	0.147354	0.470318	0.641332	0.443146	0.95672	0	0	2	0	0	2	0	0	2	0	0	0
ATP-dependent RNA helicase DDX50 OS=Homo sapiens OX=9606 GN=DDX50 PE=1 SV=1	DDX50	Q9BQ39	82566.7	Nucleus, nucleolus {ECO:0000269|PubMed:12429849}.	0	0	4.1742e+06	3.8872e+06	4.53044e+06	4.81439e+06	5.6017e+06	6.86378e+06	5.63629e+06	5.77618e+06	6.01831e+06	4.15502e+06	5.05679e+06	5.65709e+06	0.456603	1.1752	0.469149	2.75761	0.239809	0.73298	0	0	0	0	4	4	0	0	0	0	0	4
Filamin-A OS=Homo sapiens OX=9606 GN=FLNA PE=1 SV=4	FLNA	P21333	280729	Cytoplasm, cell cortex {ECO:0000269|PubMed:16291724}. Cytoplasm, cytoskeleton {ECO:0000250|UniProtKB:Q8BTM8}. Perikaryon {ECO:0000250|UniProtKB:Q8BTM8}. Cell projection, growth cone {ECO:0000250|UniProtKB:Q8BTM8}. Note=Colocalizes with CPMR1 in the central region of DRG neuron growth cone (By similarity). Following SEMA3A stimulation of DRG neurons, colocalizes with F-actin (By similarity). {ECO:…	Promotes orthogonal branching of actin filaments and links actin filaments to membrane glycoproteins. Anchors various transmembrane proteins to the actin cytoskeleton and serves as a scaffold for a wide range of cytoplasmic signaling proteins. Interaction with FLNB may allow neuroblast migration from the ventricular zone into the cortical plate. Tethers cell surface-localized furin, modulates its…	0	1.806e+07	2.11004e+07	2.07441e+07	2.56155e+07	3.19376e+07	3.78654e+07	2.84185e+07	2.82186e+07	2.62669e+07	2.91137e+07	3.29815e+07	3.23783e+07	0.671603	1.49529	0.468775	2.53866	0.657244	2.77057	14	14	17	14	21	21	17	14	19	11	17	19
General vesicular transport factor p115 OS=Homo sapiens OX=9606 GN=USO1 PE=1 SV=2	USO1	O60763	107898	Cytoplasm, cytosol {ECO:0000269|PubMed:19454686, ECO:0000269|PubMed:9478999}. Golgi apparatus membrane {ECO:0000269|PubMed:19454686, ECO:0000269|PubMed:9478999}; Peripheral membrane protein {ECO:0000269|PubMed:19454686, ECO:0000269|PubMed:9478999}. Note=Recycles between the cytosol and the Golgi apparatus during interphase. During interphase, the phosphorylated form is found exclusively in cytoso…	General vesicular transport factor required for intercisternal transport in the Golgi stack; it is required for transcytotic fusion and/or subsequent binding of the vesicles to the target membrane. May well act as a vesicular anchor by interacting with the target membrane and holding the vesicular and target membranes in proximity. {ECO:0000250|UniProtKB:P41542}.	0	7.25645e+06	6.33951e+06	8.95096e+06	5.3988e+06	5.28295e+06	4.71683e+06	7.15753e+06	7.58489e+06	1.63987e+07	6.92568e+06	3.79498e+06	7.72843e+06	-0.550133	1.39995	0.465891	0.388555	-0.28938	0.407304	6	5	7	4	3	4	6	6	7	3	3	6
DNA damage-binding protein 1 OS=Homo sapiens OX=9606 GN=DDB1 PE=1 SV=1	DDB1	Q16531	126970	Cytoplasm {ECO:0000269|PubMed:10777491, ECO:0000269|PubMed:11673459, ECO:0000269|PubMed:18593899}. Nucleus {ECO:0000269|PubMed:10777491, ECO:0000269|PubMed:11673459, ECO:0000269|PubMed:18593899}. Note=Primarily cytoplasmic (PubMed:10777491, PubMed:11673459). Translocates to the nucleus following UV irradiation and subsequently accumulates at sites of DNA damage (PubMed:10777491, PubMed:11673459).…	Protein, which is both involved in DNA repair and protein ubiquitination, as part of the UV-DDB complex and DCX (DDB1-CUL4-X-box) complexes, respectively (PubMed:15448697, PubMed:14739464, PubMed:16260596, PubMed:16482215, PubMed:17079684, PubMed:16407242, PubMed:16407252, PubMed:16940174). Core component of the UV-DDB complex (UV-damaged DNA-binding protein complex), a complex that recognizes UV…	0	2.1261e+06	2.57479e+06	2.38791e+06	8.05046e+06	1.89391e+06	3.20512e+06	2.33925e+06	3.12929e+06	4.32105e+06	4.62717e+06	2.30985e+06	2.24671e+06	0.891391	0.465546	0.465704	0.694519	0.373536	0.367787	0	0	0	5	2	2	0	0	3	0	0	2
Tetratricopeptide repeat protein 37 OS=Homo sapiens OX=9606 GN=TTC37 PE=1 SV=1	TTC37	Q6PGP7	175492	Cytoplasm {ECO:0000269|PubMed:16024656}. Nucleus {ECO:0000269|PubMed:16024656}.	Component of the SKI complex which is thought to be involved in exosome-mediated RNA decay and associates with transcriptionally active genes in a manner dependent on PAF1 complex (PAF1C).	0	2.48103e+06	2.06868e+06	897998	2.44406e+06	896711	2.61304e+06	1.72793e+06	2.60606e+06	3.18347e+06	1.45465e+06	1.46733e+06	2.45922e+06	0.128164	0.0824895	0.464598	0.470192	-0.0177223	0.0126451	0	0	2	0	0	0	0	0	0	0	0	0
Presequence protease, mitochondrial OS=Homo sapiens OX=9606 GN=PITRM1 PE=1 SV=3	PITRM1	Q5JRX3	117416	Mitochondrion matrix {ECO:0000269|PubMed:16849325, ECO:0000269|PubMed:19196155}.	Metalloendopeptidase of the mitochondrial matrix that functions in peptide cleavage and degradation rather than in protein processing (PubMed:10360838, PubMed:16849325, PubMed:19196155, PubMed:24931469). Has an ATP-independent activity (PubMed:16849325). Specifically cleaves peptides in the range of 5 to 65 residues (PubMed:19196155). Shows a preference for cleavage after small polar residues and…	0	9.51922e+06	1.81491e+07	2.14652e+07	1.89147e+07	1.73384e+07	2.2833e+07	2.14624e+07	2.0501e+07	2.57667e+07	1.41577e+07	1.85073e+07	1.60874e+07	0.266114	0.351894	0.46309	0.725451	-0.0112324	0.011094	8	11	15	11	13	14	10	8	14	6	8	9
L-2-hydroxyglutarate dehydrogenase, mitochondrial OS=Homo sapiens OX=9606 GN=L2HGDH PE=1 SV=3	L2HGDH	Q9H9P8	50317.4	Mitochondrion {ECO:0000269|PubMed:16005139}.	0	0	2.08057e+06	2.61864e+06	2.84561e+06	3.13605e+06	3.4554e+06	2.55727e+06	3.99417e+06	2.28622e+06	4.11697e+06	3.38204e+06	2.96299e+06	2.36274e+06	0.278084	0.702362	0.462658	0.683149	0.206817	0.447207	0	0	2	2	0	0	2	0	2	2	2	0
Basigin OS=Homo sapiens OX=9606 GN=BSG PE=1 SV=2	BSG	P35613	42199.7	Melanosome {ECO:0000269|PubMed:17081065}. Note=Identified by mass spectrometry in melanosome fractions from stage I to stage IV. {ECO:0000269|PubMed:17081065}.; [Isoform 1]: Cell membrane {ECO:0000269|PubMed:25957687}; Single-pass type I membrane protein {ECO:0000250|UniProtKB:P26453}. Photoreceptor inner segment {ECO:0000250|UniProtKB:P18572}. Cell projection, cilium, photoreceptor outer segment…	[Isoform 1]: Essential for normal retinal maturation and development (By similarity). Acts as a retinal cell surface receptor for NXNL1 and plays an important role in NXNL1-mediated survival of retinal cone photoreceptors (PubMed:25957687). In association with glucose transporter SLC16A1/GLUT1 and NXNL1, promotes retinal cone survival by enhancing aerobic glycolysis and accelerating the entry of …	TRANSMEM 324..344; /note="Helical"; /evidence="ECO:0000255"	9.40411e+06	6.85558e+06	7.55816e+06	8.13636e+06	4.70371e+06	5.66965e+06	1.63525e+07	1.05389e+07	5.9042e+06	5.30888e+06	3.82731e+06	5.02351e+06	-0.36376	0.625089	0.46146	0.407458	-0.750252	1.65713	4	4	3	0	2	3	6	3	4	0	2	0
Heterogeneous nuclear ribonucleoprotein D0 OS=Homo sapiens OX=9606 GN=HNRNPD PE=1 SV=1	HNRNPD	Q14103	38434.5	Nucleus. Cytoplasm. Note=Localized in cytoplasmic mRNP granules containing untranslated mRNAs. Component of ribonucleosomes. Cytoplasmic localization oscillates diurnally.	Binds with high affinity to RNA molecules that contain AU-rich elements (AREs) found within the 3'-UTR of many proto-oncogenes and cytokine mRNAs. Also binds to double- and single-stranded DNA sequences in a specific manner and functions a transcription factor. Each of the RNA-binding domains specifically can bind solely to a single-stranded non-monotonous 5'-UUAG-3' sequence and also weaker to t…	0	3.45401e+07	2.15133e+07	3.55928e+07	3.73177e+07	4.67231e+07	3.05285e+07	5.13888e+07	3.71017e+07	3.76683e+07	7.11231e+07	4.09865e+07	5.75762e+07	0.322074	0.513648	0.461093	0.818971	0.888719	1.24374	9	6	11	9	10	8	9	4	11	5	7	9
Regulator of nonsense transcripts 2 OS=Homo sapiens OX=9606 GN=UPF2 PE=1 SV=1	UPF2	Q9HAU5	147814	Cytoplasm, perinuclear region {ECO:0000269|PubMed:11073994, ECO:0000269|PubMed:11113196, ECO:0000269|PubMed:11163187}.	Involved in nonsense-mediated decay (NMD) of mRNAs containing premature stop codons by associating with the nuclear exon junction complex (EJC). Recruited by UPF3B associated with the EJC core at the cytoplasmic side of the nuclear envelope and the subsequent formation of an UPF1-UPF2-UPF3 surveillance complex (including UPF1 bound to release factors at the stalled ribosome) is believed to activa…	0	1.4349e+06	1.68704e+06	1.26542e+06	2.03931e+06	1.30568e+06	1.52678e+06	2.17825e+06	2.61037e+06	1.24338e+06	2.31154e+06	2.07861e+06	1.66472e+06	0.15109	0.257526	0.459283	0.579464	0.464741	1.15993	0	0	2	0	0	0	0	0	0	0	0	0
Aconitate hydratase, mitochondrial OS=Homo sapiens OX=9606 GN=ACO2 PE=1 SV=2	ACO2	Q99798	85428	Mitochondrion {ECO:0000250|UniProtKB:P16276}.	Catalyzes the isomerization of citrate to isocitrate via cis-aconitate. {ECO:0000250|UniProtKB:P16276}.	0	6.04552e+06	3.55639e+06	4.8189e+06	7.86555e+06	1.74778e+06	1.03543e+07	3.78201e+06	4.85262e+06	1.11866e+07	8.93273e+06	7.92541e+06	1.05094e+07	0.469514	0.2801	0.458893	0.30257	0.924312	1.84561	2	2	4	5	2	5	3	2	7	2	3	4
E3 ubiquitin/ISG15 ligase TRIM25 OS=Homo sapiens OX=9606 GN=TRIM25 PE=1 SV=2	TRIM25	Q14258	70973.2	Cytoplasm {ECO:0000269|PubMed:17392790}. Cytoplasm, Stress granule {ECO:0000269|PubMed:23950712}.	Functions as a ubiquitin E3 ligase and as an ISG15 E3 ligase (PubMed:16352599). Involved in innate immune defense against viruses by mediating ubiquitination of DDX58 and IFIH1 (PubMed:17392790, PubMed:30193849). Mediates 'Lys-63'-linked polyubiquitination of the DDX58 N-terminal CARD-like region and may play a role in signal transduction that leads to the production of interferons in response to…	0	1.98807e+06	1.39234e+06	2.62501e+06	2.49104e+06	2.56891e+06	4.38323e+06	2.07999e+06	1.32779e+06	4.83751e+06	1.82436e+06	1.9134e+06	2.26017e+06	0.65301	0.736518	0.457309	0.265131	-0.00179799	0.00214279	0	2	3	2	0	3	0	2	3	0	0	0
Cytoplasmic dynein 1 intermediate chain 2 OS=Homo sapiens OX=9606 GN=DYNC1I2 PE=1 SV=3	DYNC1I2	Q13409	71455.8	Cytoplasm, cytoskeleton {ECO:0000250|UniProtKB:O88487}. Cytoplasm {ECO:0000250|UniProtKB:O88487}. Note=Detected in the cytoplasm of pachytene spermatocytes. Localizes to the manchette in elongating spermatids. {ECO:0000250|UniProtKB:O88487}.	Acts as one of several non-catalytic accessory components of the cytoplasmic dynein 1 complex that are thought to be involved in linking dynein to cargos and to adapter proteins that regulate dynein function (PubMed:31079899). Cytoplasmic dynein 1 acts as a motor for the intracellular retrograde motility of vesicles and organelles along microtubules (PubMed:31079899). The intermediate chains medi…	0	901790	831276	583253	1.30465e+06	1.0115e+06	876888	1.181e+06	919929	1.07877e+06	979542	660729	757199	0.463097	0.854178	0.457055	1.10127	0.0496785	0.0700553	2	0	2	3	0	2	0	0	0	0	0	0
Neurofibromin OS=Homo sapiens OX=9606 GN=NF1 PE=1 SV=2	NF1	P21359	319378	Nucleus {ECO:0000269|PubMed:14988005}. Nucleus, nucleolus {ECO:0000269|PubMed:14988005}.	Stimulates the GTPase activity of Ras. NF1 shows greater affinity for Ras GAP, but lower specific activity. May be a regulator of Ras activity. {ECO:0000269|PubMed:2121371, ECO:0000269|PubMed:8417346}.	0	2.47135e+06	1.82004e+06	1.79838e+06	1.9636e+06	1.63642e+06	3.03803e+06	3.50069e+06	2.66677e+06	2.19033e+06	2.65975e+06	1.96522e+06	2.94112e+06	0.124373	0.14185	0.456735	0.789461	0.313164	0.604989	0	2	0	0	0	0	0	0	0	0	0	0
SR-related and CTD-associated factor 4 OS=Homo sapiens OX=9606 GN=SCAF4 PE=1 SV=3	SCAF4	O95104	125868	Nucleus {ECO:0000269|PubMed:31104839}.	Anti-terminator protein required to prevent early mRNA termination during transcription (PubMed:31104839). Together with SCAF8, acts by suppressing the use of early, alternative poly(A) sites, thereby preventing the accumulation of non-functional truncated proteins (PubMed:31104839). Mechanistically, associates with the phosphorylated C-terminal heptapeptide repeat domain (CTD) of the largest RNA…	0	4.54762e+06	4.49871e+06	5.22626e+06	6.37311e+06	4.13488e+06	5.83025e+06	4.85261e+06	6.98124e+06	7.75101e+06	4.55568e+06	4.89899e+06	1.33633e+07	0.195006	0.40966	0.456491	0.921098	0.676925	0.420098	0	2	0	0	2	0	0	2	0	2	0	4
Succinate dehydrogenase [ubiquinone] flavoprotein subunit, mitochondrial OS=Homo sapiens OX=9606 GN=SDHA PE=1 SV=2	SDHA	P31040	72691.8	Mitochondrion inner membrane {ECO:0000250|UniProtKB:Q0QF01}; Peripheral membrane protein {ECO:0000250|UniProtKB:Q0QF01}; Matrix side {ECO:0000250|UniProtKB:Q0QF01}.	Flavoprotein (FP) subunit of succinate dehydrogenase (SDH) that is involved in complex II of the mitochondrial electron transport chain and is responsible for transferring electrons from succinate to ubiquinone (coenzyme Q) (PubMed:24781757). Can act as a tumor suppressor (PubMed:20484225). {ECO:0000269|PubMed:20484225, ECO:0000305|PubMed:24781757}.	0	2.33351e+07	2.85955e+07	1.68762e+07	2.91152e+07	3.17813e+07	3.18845e+07	3.53877e+07	3.23858e+07	2.66407e+07	4.09805e+07	3.02528e+07	2.38756e+07	0.431279	1.07071	0.456453	0.939075	0.46703	0.657982	12	12	12	12	16	14	14	14	13	12	11	13
RNA-binding protein EWS OS=Homo sapiens OX=9606 GN=EWSR1 PE=1 SV=1	EWSR1	Q01844	68478.4	Nucleus {ECO:0000269|PubMed:16965792}. Cytoplasm {ECO:0000269|PubMed:16965792}. Cell membrane {ECO:0000269|PubMed:16965792}. Note=Relocates from cytoplasm to ribosomes upon PTK2B/FAK2 activation.	Might normally function as a transcriptional repressor. EWS-fusion-proteins (EFPS) may play a role in the tumorigenic process. They may disturb gene expression by mimicking, or interfering with the normal function of CTD-POLII within the transcription initiation complex. They may also contribute to an aberrant activation of the fusion protein target genes.	0	3.74226e+06	4.51631e+06	5.20201e+06	4.76868e+06	1.30024e+07	4.40818e+06	6.23121e+06	5.81783e+06	6.39704e+06	7.48536e+06	5.42965e+06	5.84537e+06	0.72047	0.439238	0.454573	1.66159	0.478948	1.09872	0	0	0	0	0	0	0	0	0	2	0	0
RNA-binding protein FUS OS=Homo sapiens OX=9606 GN=FUS PE=1 SV=1	FUS	P35637	53426	Nucleus {ECO:0000269|PubMed:19251627, ECO:0000269|PubMed:19251628, ECO:0000269|PubMed:24204307, ECO:0000269|PubMed:25453086, ECO:0000269|PubMed:30354839}. Note=Displays a punctate pattern inside the nucleus and is excluded from nucleoli. {ECO:0000269|PubMed:25453086}.	DNA/RNA-binding protein that plays a role in various cellular processes such as transcription regulation, RNA splicing, RNA transport, DNA repair and damage response (PubMed:27731383). Binds to nascent pre-mRNAs and acts as a molecular mediator between RNA polymerase II and U1 small nuclear ribonucleoprotein thereby coupling transcription and splicing (PubMed:26124092). Binds also its own pre-mRN…	0	2.51127e+06	2.88527e+06	2.37118e+06	4.63588e+06	3.8322e+06	4.73908e+06	3.93332e+06	3.66268e+06	3.04693e+06	4.40103e+06	1.10796e+07	6.32511e+06	0.765758	2.29516	0.454332	1.46375	1.48914	1.10531	0	0	2	2	4	4	2	4	3	3	5	4
DNA repair protein RAD50 OS=Homo sapiens OX=9606 GN=RAD50 PE=1 SV=1	RAD50	Q92878	153898	Nucleus {ECO:0000269|PubMed:10783165, ECO:0000269|PubMed:15916964, ECO:0000269|PubMed:26215093}. Chromosome, telomere {ECO:0000269|PubMed:10888888}. Chromosome {ECO:0000269|PubMed:26215093}. Note=Localizes to discrete nuclear foci after treatment with genotoxic agents. {ECO:0000269|PubMed:10783165, ECO:0000269|PubMed:15916964, ECO:0000269|PubMed:26215093}.	Component of the MRN complex, which plays a central role in double-strand break (DSB) repair, DNA recombination, maintenance of telomere integrity and meiosis. The complex possesses single-strand endonuclease activity and double-strand-specific 3'-5' exonuclease activity, which are provided by MRE11. RAD50 may be required to bind DNA ends and hold them in close proximity. This could facilitate se…	0	8.81437e+06	2.44747e+06	5.53213e+06	9.02482e+06	7.21142e+06	9.5944e+06	6.70646e+06	5.07505e+06	1.1208e+07	5.99722e+06	6.06464e+06	1.27381e+07	0.621139	0.695376	0.453031	0.327027	0.562391	0.388578	8	2	6	6	7	7	4	4	8	0	4	8
ATP synthase subunit O, mitochondrial OS=Homo sapiens OX=9606 GN=ATP5PO PE=1 SV=1	ATP5PO	P48047	23277.4	Mitochondrion {ECO:0000250}. Mitochondrion inner membrane {ECO:0000250}.	Mitochondrial membrane ATP synthase (F(1)F(0) ATP synthase or Complex V) produces ATP from ADP in the presence of a proton gradient across the membrane which is generated by electron transport complexes of the respiratory chain. F-type ATPases consist of two structural domains, F(1) - containing the extramembraneous catalytic core and F(0) - containing the membrane proton channel, linked together…	0	7.78104e+06	8.83228e+06	7.74241e+06	6.31395e+06	1.23471e+07	1.11292e+07	1.35517e+07	9.67142e+06	1.01174e+07	6.89095e+06	1.52351e+06	2.22984e+06	0.290577	0.410089	0.453013	1.10298	-1.19418	1.24668	4	3	4	2	5	3	4	3	5	0	2	2
Proteasome subunit alpha type-6 OS=Homo sapiens OX=9606 GN=PSMA6 PE=1 SV=1	PSMA6	P60900	27399.5	Cytoplasm {ECO:0000269|PubMed:12181345}. Nucleus {ECO:0000269|PubMed:12181345}. Note=Colocalizes with TRIM5 in cytoplasmic bodies. {ECO:0000250|UniProtKB:Q9QUM9}.	Component of the 20S core proteasome complex involved in the proteolytic degradation of most intracellular proteins. This complex plays numerous essential roles within the cell by associating with different regulatory particles. Associated with two 19S regulatory particles, forms the 26S proteasome and thus participates in the ATP-dependent degradation of ubiquitinated proteins. The 26S proteasom…	0	4.05179e+06	3.39356e+06	4.57299e+06	3.7186e+06	5.46694e+06	4.65828e+06	5.38469e+06	4.0078e+06	7.05289e+06	5.78201e+06	3.4827e+06	4.80653e+06	0.204005	0.426318	0.452447	0.714187	0.227514	0.384717	0	0	0	2	0	0	0	0	5	0	0	2
Elongation factor G, mitochondrial OS=Homo sapiens OX=9606 GN=GFM1 PE=1 SV=2	GFM1	Q96RP9	83473.5	Mitochondrion {ECO:0000255|HAMAP-Rule:MF_03061}.	Mitochondrial GTPase that catalyzes the GTP-dependent ribosomal translocation step during translation elongation. During this step, the ribosome changes from the pre-translocational (PRE) to the post-translocational (POST) state as the newly formed A-site-bound peptidyl-tRNA and P-site-bound deacylated tRNA move to the P and E sites, respectively. Catalyzes the coordinated movement of the two tRN…	0	2.29698e+07	2.33879e+07	1.28102e+07	2.31632e+07	2.55928e+07	3.73345e+07	26342791	3.00707e+07	2.45469e+07	2.36874e+07	1.20273e+07	1.81047e+07	0.541039	0.737841	0.452403	0.885615	-0.136689	0.136337	12	11	7	8	12	13	11	11	11	8	7	9
SWISS-PROT:Q3MHN2 (Bos taurus) Complement component C9 precursor	#VALUE!	Q3MHN2	61999.9	#N/A	#N/A	#N/A	2.13522e+06	2.06764e+06	2.01574e+06	3.06825e+06	2.21654e+06	2.39003e+06	2.31775e+06	3.60836e+06	2.57983e+06	2.8319e+06	1.91943e+06	2.22511e+06	0.303544	0.860979	0.451882	0.899477	0.165902	0.39467	0	2	0	0	2	2	0	0	2	0	0	0
tRNA pseudouridine synthase A OS=Homo sapiens OX=9606 GN=PUS1 PE=1 SV=3	PUS1	Q9Y606	47470.5	[Isoform 1]: Mitochondrion {ECO:0000269|PubMed:17056637}.; [Isoform 2]: Nucleus {ECO:0000269|PubMed:17056637}.	Converts specific uridines to PSI in a number of tRNA substrates. Acts on positions 27/28 in the anticodon stem and also positions 34 and 36 in the anticodon of an intron containing tRNA. Involved in regulation of nuclear receptor activity through pseudouridylation of SRA1 RNA. {ECO:0000269|PubMed:24722331}.	0	3.55394e+06	5.09368e+06	4.14201e+06	3.32012e+06	2.95388e+06	4.52758e+06	7.94558e+06	5.44416e+06	4.09186e+06	3.8973e+06	5.52113e+06	4.16061e+06	-0.243732	0.434133	0.450864	0.572923	0.0864072	0.144983	2	3	4	0	2	3	5	3	3	0	3	2
Eukaryotic translation initiation factor 3 subunit B OS=Homo sapiens OX=9606 GN=EIF3B PE=1 SV=3	EIF3B	P55884	92482.8	Cytoplasm {ECO:0000255|HAMAP-Rule:MF_03001}.	RNA-binding component of the eukaryotic translation initiation factor 3 (eIF-3) complex, which is required for several steps in the initiation of protein synthesis (PubMed:9388245, PubMed:17581632, PubMed:25849773, PubMed:27462815). The eIF-3 complex associates with the 40S ribosome and facilitates the recruitment of eIF-1, eIF-1A, eIF-2:GTP:methionyl-tRNAi and eIF-5 to form the 43S pre-initiatio…	0	4.67186e+06	3.22019e+06	3.13998e+06	7.3091e+06	9.99371e+06	4.55245e+06	4.40958e+06	4.15393e+06	6.50249e+06	4.81171e+06	5.64482e+06	7.3968e+06	0.986282	1.02803	0.449597	0.683083	0.694494	1.17478	5	3	4	6	7	5	0	0	5	0	0	4
3-hydroxyisobutyryl-CoA hydrolase, mitochondrial OS=Homo sapiens OX=9606 GN=HIBCH PE=1 SV=2	HIBCH	Q6NVY1	43484	Mitochondrion {ECO:0000250}.	Hydrolyzes 3-hydroxyisobutyryl-CoA (HIBYL-CoA), a saline catabolite. Has high activity toward isobutyryl-CoA. Could be an isobutyryl-CoA dehydrogenase that functions in valine catabolism. Also hydrolyzes 3-hydroxypropanoyl-CoA. {ECO:0000269|PubMed:8824301}.	0	2.91532e+06	6.15595e+06	6.12059e+06	5.02872e+06	4.92034e+06	6.2263e+06	6.34705e+06	7.27458e+06	7.12411e+06	788092	4.09029e+06	2.5288e+06	0.0904988	0.102227	0.449516	0.766193	-1.0363	0.8381	5	5	7	5	5	5	5	7	7	2	4	4
Histone H4 OS=Homo sapiens OX=9606 GN=H4C1 PE=1 SV=2	H4C1	P62805	11367.7	Nucleus. Chromosome.	Core component of nucleosome. Nucleosomes wrap and compact DNA into chromatin, limiting DNA accessibility to the cellular machineries which require DNA as a template. Histones thereby play a central role in transcription regulation, DNA repair, DNA replication and chromosomal stability. DNA accessibility is regulated via a complex set of post-translational modifications of histones, also called h…	0	2.16251e+06	2.58898e+06	1.63075e+06	2.199e+06	5.68159e+06	3.96172e+06	2.62045e+06	3.01199e+06	3.05904e+06	5.94141e+06	3.25914e+06	6.20161e+06	0.891817	0.807192	0.44554	1.16726	1.271	1.42693	0	0	2	2	3	3	0	0	0	3	0	2
DnaJ homolog subfamily C member 7 OS=Homo sapiens OX=9606 GN=DNAJC7 PE=1 SV=2	DNAJC7	Q99615	56442.9	Cytoplasm {ECO:0000269|PubMed:11573955, ECO:0000269|PubMed:12853476}. Nucleus {ECO:0000269|PubMed:11573955}. Cytoplasm, cytoskeleton {ECO:0000250|UniProtKB:Q9QYI3}. Note=Colocalizes with NR1I3 to microtubules. {ECO:0000250|UniProtKB:Q9QYI3}.	Acts as co-chaperone regulating the molecular chaperones HSP70 and HSP90 in folding of steroid receptors, such as the glucocorticoid receptor and the progesterone receptor. Proposed to act as a recycling chaperone by facilitating the return of chaperone substrates to early stages of chaperoning if further folding is required. In vitro, induces ATP-independent dissociation of HSP90 but not of HSP7…	0	4.18189e+06	8.3277e+06	1.79382e+06	7.57136e+06	4.33523e+06	7.27794e+06	1.18813e+07	2.76845e+06	4.82543e+06	8.51381e+06	6.10993e+06	4.13885e+06	0.423585	0.305246	0.445275	0.197584	0.391501	0.258331	3	5	2	4	3	4	7	3	5	3	4	0
Ankyrin repeat domain-containing protein 17 OS=Homo sapiens OX=9606 GN=ANKRD17 PE=1 SV=3	ANKRD17	O75179	274256	Cytoplasm {ECO:0000269|PubMed:17276651, ECO:0000269|PubMed:22328336}. Nucleus {ECO:0000269|PubMed:17276651, ECO:0000269|PubMed:19150984, ECO:0000269|PubMed:22328336}. Note=Detected around the nucleolus. Localized on chromatin in a cell cycle-dependent manner. {ECO:0000269|PubMed:17276651, ECO:0000269|PubMed:19150984}.	Could play pivotal roles in cell cycle and DNA regulation (PubMed:19150984). Involved in innate immune defense against viruse by positively regulating the viral dsRNA receptors DDX58 and IFIH1 signaling pathways (PubMed:22328336). Involves in NOD2- and NOD1-mediated responses to bacteria suggesting a role in innate antibacterial immune pathways too (PubMed:23711367). Target of enterovirus 71 whic…	0	1.63717e+06	963452	874204	1.37933e+06	1.70072e+06	1.81962e+06	1.29501e+06	1.81471e+06	1.6183e+06	2.80633e+06	1.4571e+06	1.90541e+06	0.495745	0.799927	0.444295	0.665604	0.828056	0.902724	2	0	2	0	0	0	0	0	2	0	0	0
Protein transport protein Sec61 subunit beta OS=Homo sapiens OX=9606 GN=SEC61B PE=1 SV=2	SEC61B	P60468	9974.4	Endoplasmic reticulum membrane {ECO:0000269|PubMed:27044890}; Single-pass membrane protein {ECO:0000255}.	Component of SEC61 channel-forming translocon complex that mediates transport of signal peptide-containing precursor polypeptides across endoplasmic reticulum (ER) (By similarity). Required for PKD1/Polycystin-1 biogenesis (By similarity). {ECO:0000250|UniProtKB:P60467, ECO:0000250|UniProtKB:Q9CQS8}.	TRANSMEM 71..91; /note="Helical"; /evidence="ECO:0000255"	1.14636e+06	1.25491e+06	1.39459e+06	1.55636e+06	1.20041e+06	1.31744e+06	1.82782e+06	1.65356e+06	1.67568e+06	2.07571e+06	1.87631e+06	1.7123e+06	0.102095	0.296224	0.442124	2.13234	0.577476	2.09233	2	0	0	0	0	0	0	0	0	0	0	0
26S proteasome non-ATPase regulatory subunit 6 OS=Homo sapiens OX=9606 GN=PSMD6 PE=1 SV=1	PSMD6	Q15008	45533.4	0	Component of the 26S proteasome, a multiprotein complex involved in the ATP-dependent degradation of ubiquitinated proteins. This complex plays a key role in the maintenance of protein homeostasis by removing misfolded or damaged proteins, which could impair cellular functions, and by removing proteins whose functions are no longer required. Therefore, the proteasome participates in numerous cell…	0	3.42891e+06	2.14307e+06	3.13523e+06	3.17666e+06	3.23336e+06	3.4907e+06	3.14306e+06	5.17292e+06	3.50953e+06	4.68548e+06	5.5038e+06	5.01648e+06	0.185323	0.423515	0.441621	0.637089	0.804337	2.04773	3	2	0	0	0	0	0	3	0	0	0	0
28S ribosomal protein S17, mitochondrial OS=Homo sapiens OX=9606 GN=MRPS17 PE=1 SV=1	MRPS17	Q9Y2R5	14502	Mitochondrion {ECO:0000269|PubMed:25838379}.	0	0	3.5954e+06	4.2886e+06	2.6229e+06	3.72162e+06	3.33592e+06	2.5369e+06	4.60279e+06	6.11148e+06	3.53068e+06	4.32687e+06	4.42978e+06	3.563e+06	-0.131067	0.196109	0.439112	0.629871	0.229623	0.47167	2	2	2	0	0	0	0	2	2	0	2	0
WD40 repeat-containing protein SMU1 OS=Homo sapiens OX=9606 GN=SMU1 PE=1 SV=2	SMU1	Q2TAY7	57544.8	Cytoplasm {ECO:0000250|UniProtKB:Q99M63}. Nucleus {ECO:0000269|PubMed:24945353, ECO:0000269|PubMed:28781166}. Nucleus speckle {ECO:0000250|UniProtKB:Q76B40}. Note=Colocalizes with SRSF1 in nuclear speckles. {ECO:0000250|UniProtKB:Q76B40}.	Involved in pre-mRNA splicing as a component of the spliceosome (PubMed:28781166). Regulates alternative splicing of the HSPG2 pre-mRNA (By similarity). Required for normal accumulation of IK (PubMed:24945353). Required for normal mitotic spindle assembly and normal progress through mitosis (By similarity). {ECO:0000250|UniProtKB:Q76B40, ECO:0000269|PubMed:24945353, ECO:0000269|PubMed:28781166, E…	0	4.14997e+06	4.49314e+06	3.48557e+06	3.498e+06	6.96816e+06	2.95003e+06	5.5077e+06	5.00585e+06	5.92447e+06	6.04551e+06	5.01889e+06	4.32347e+06	0.145553	0.121195	0.438614	1.64824	0.343371	0.870051	0	0	3	3	4	2	0	0	5	0	0	2
60S ribosomal protein L30 OS=Homo sapiens OX=9606 GN=RPL30 PE=1 SV=2	RPL30	P62888	12784.7	0	0	0	5.10211e+06	5.28772e+06	4.59503e+06	5.79246e+06	6.94901e+06	1.59022e+07	8.01259e+06	6.35168e+06	5.93916e+06	7.89195e+06	7.38217e+06	7.51811e+06	0.93471	0.641993	0.438217	1.24852	0.605037	3.27093	2	2	2	0	2	3	2	2	2	0	0	0
Isocitrate dehydrogenase [NAD] subunit alpha, mitochondrial OS=Homo sapiens OX=9606 GN=IDH3A PE=1 SV=1	IDH3A	P50213	39592.5	Mitochondrion.	Catalytic subunit of the enzyme which catalyzes the decarboxylation of isocitrate (ICT) into alpha-ketoglutarate. The heterodimer composed of the alpha (IDH3A) and beta (IDH3B) subunits and the heterodimer composed of the alpha (IDH3A) and gamma (IDH3G) subunits, have considerable basal activity but the full activity of the heterotetramer (containing two subunits of IDH3A, one of IDH3B and one of…	0	1.2759e+07	1.1704e+07	1.79099e+07	2.14458e+07	1.44019e+07	1.94393e+07	1.60142e+07	1.9075e+07	2.23202e+07	1.50614e+07	1.8021e+07	1.46652e+07	0.383797	0.690018	0.438144	0.883125	0.172286	0.337937	6	6	8	8	6	7	5	5	8	3	5	5
Purine nucleoside phosphorylase OS=Homo sapiens OX=9606 GN=PNP PE=1 SV=2	PNP	P00491	32118	Cytoplasm, cytoskeleton {ECO:0000250}. Cytoplasm {ECO:0000269|PubMed:22509282}.	The purine nucleoside phosphorylases catalyze the phosphorolytic breakdown of the N-glycosidic bond in the beta-(deoxy)ribonucleoside molecules, with the formation of the corresponding free purine bases and pentose-1-phosphate. {ECO:0000269|PubMed:2104852}.	0	1.661e+06	1.14013e+06	1.18975e+06	3.69703e+06	1.03891e+06	2.38165e+06	1.09289e+06	1.41736e+06	2.89232e+06	3.26391e+06	1.35363e+06	710184	0.834687	0.593415	0.436942	0.336019	0.416816	0.221541	0	0	0	2	2	2	0	0	2	0	0	0
Cytosolic acyl coenzyme A thioester hydrolase OS=Homo sapiens OX=9606 GN=ACOT7 PE=1 SV=3	ACOT7	O00154	41795	[Isoform 4]: Cytoplasm, cytosol {ECO:0000305|PubMed:12435388}.; [Isoform 6]: Cytoplasm, cytosol {ECO:0000305|PubMed:12435388}.; [Isoform 1]: Mitochondrion {ECO:0000269|PubMed:12435388}.; [Isoform 5]: Mitochondrion {ECO:0000269|PubMed:12435388}.	Acyl-CoA thioesterases are a group of enzymes that catalyze the hydrolysis of acyl-CoAs to the free fatty acid and coenzyme A (CoASH), providing the potential to regulate intracellular levels of acyl-CoAs, free fatty acids and CoASH (PubMed:10578051). Acyl-coenzyme A thioesterase 7/ACOT7 preferentially hydrolyzes palmitoyl-CoA, but has a broad specificity acting on other fatty acyl-CoAs with chai…	0	3.82871e+06	1.91377e+06	5.23035e+06	2.99692e+06	3.93711e+06	3.65038e+06	3.30786e+06	5.14385e+06	6.40208e+06	3.10686e+06	3.30972e+06	3.74658e+06	-0.0519957	0.0441698	0.436895	0.418895	-0.110587	0.0987779	3	2	4	2	2	2	2	2	3	0	2	2
Aladin OS=Homo sapiens OX=9606 GN=AAAS PE=1 SV=1	AAAS	Q9NRG9	59574.1	Nucleus, nuclear pore complex {ECO:0000269|PubMed:19782045}. Cytoplasm, cytoskeleton, spindle pole {ECO:0000269|PubMed:26246606}. Nucleus envelope {ECO:0000269|PubMed:27754849}. Note=In metaphase cells localizes within the spindle with some accumulation around spindle poles, with the highest concentration between the centrosome and metaphase plate (PubMed:26246606). The localization to the spindl…	Plays a role in the normal development of the peripheral and central nervous system (PubMed:11062474, PubMed:11159947, PubMed:16022285). Required for the correct localization of aurora kinase AURKA and the microtubule minus end-binding protein NUMA1 as well as a subset of AURKA targets which ensures proper spindle formation and timely chromosome alignment (PubMed:26246606). {ECO:0000269|PubMed:11…	0	2.2928e+06	2.69897e+06	2.61611e+06	2.97262e+06	4.37411e+06	3.69136e+06	2.73029e+06	3.25628e+06	4.30394e+06	3.17011e+06	2.81956e+06	2.79818e+06	0.536921	1.26774	0.435745	0.868944	0.208012	1.06925	2	0	0	0	3	2	0	0	4	0	0	0
Serine/threonine-protein phosphatase 6 regulatory subunit 3 OS=Homo sapiens OX=9606 GN=PPP6R3 PE=1 SV=2	PPP6R3	Q5H9R7	97671.4	Cytoplasm. Nucleus.	Regulatory subunit of protein phosphatase 6 (PP6). May function as a scaffolding PP6 subunit. May have an important role in maintaining immune self-tolerance. {ECO:0000269|PubMed:11401438, ECO:0000269|PubMed:16769727}.	0	1.50197e+06	1.64128e+06	668700	2.13919e+06	1.13699e+06	1.71716e+06	1.18152e+06	2.11668e+06	1.8523e+06	1.68439e+06	1.11456e+06	1.85174e+06	0.389474	0.396022	0.434181	0.468973	0.286914	0.301622	0	2	2	2	0	2	0	0	0	0	0	0
DAZ-associated protein 1 OS=Homo sapiens OX=9606 GN=DAZAP1 PE=1 SV=1	DAZAP1	Q96EP5	43383	Cytoplasm {ECO:0000269|PubMed:22001406}. Nucleus {ECO:0000269|PubMed:22001406}. Note=Predominantly cytoplasmic (By similarity). Nuclear at some stages of spermatozoides development. In midpachytene spermatocytes, it is localized in both the cytoplasm and the nuclei and is clearly excluded from the sex vesicles. In round spermatids, it localizes mainly in the nuclei, whereas in elongated spermatid…	RNA-binding protein, which may be required during spermatogenesis.	0	2.25443e+06	2.50773e+06	2.79222e+06	3.23093e+06	6.78762e+06	3.11571e+06	1.84544e+06	2.87e+06	5.48861e+06	1.62552e+07	1.28481e+07	9.47444e+06	0.79795	0.697626	0.433757	0.332151	2.35239	2.20569	2	2	2	0	3	2	2	2	3	3	3	4
Vimentin OS=Homo sapiens OX=9606 GN=VIM PE=1 SV=4	VIM	P08670	53652.7	Cytoplasm {ECO:0000269|PubMed:21465480, ECO:0000269|PubMed:29496907}. Cytoplasm, cytoskeleton {ECO:0000269|PubMed:18408015, ECO:0000269|PubMed:29496907}. Nucleus matrix {ECO:0000250|UniProtKB:P31000}. Cell membrane {ECO:0000250|UniProtKB:P20152}.	Vimentins are class-III intermediate filaments found in various non-epithelial cells, especially mesenchymal cells. Vimentin is attached to the nucleus, endoplasmic reticulum, and mitochondria, either laterally or terminally. {ECO:0000269|PubMed:21746880}.; Involved with LARP6 in the stabilization of type I collagen mRNAs for CO1A1 and CO1A2. {ECO:0000269|PubMed:21746880}.	0	1.27732e+07	7.05509e+06	1.32092e+07	1.27941e+07	2.9015e+07	2.94854e+07	1.34418e+07	1.18191e+07	1.93404e+07	1.10163e+07	9.40614e+06	1.44704e+07	1.10969	1.02624	0.43298	0.566021	0.0788249	0.0885555	8	5	8	7	14	12	0	0	10	0	4	6
RNA-binding protein 10 OS=Homo sapiens OX=9606 GN=RBM10 PE=1 SV=3	RBM10	P98175	103535	Nucleus {ECO:0000269|PubMed:18315527}. Note=In the extranucleolar nucleoplasm constitutes hundreds of nuclear domains, which dynamically change their structures in a reversible manner. Upon globally reducing RNA polymerase II transcription, the nuclear bodies enlarge and decrease in number. They occur closely adjacent to nuclear speckles or IGCs (interchromatin granule clusters) but coincide with…	May be involved in post-transcriptional processing, most probably in mRNA splicing. Binds to RNA homopolymers, with a preference for poly(G) and poly(U) and little for poly(A) (By similarity). May bind to specific miRNA hairpins (PubMed:28431233). {ECO:0000250|UniProtKB:P70501, ECO:0000269|PubMed:18315527, ECO:0000269|PubMed:28431233}.	0	2.81e+06	3.42495e+06	2.9665e+06	3.29491e+06	1.20035e+07	3.70301e+06	4.63959e+06	3.89119e+06	3.88496e+06	2.69865e+06	1.3606e+06	2.39929e+06	1.04618	0.502206	0.432238	1.58161	-0.510654	0.961075	0	0	0	0	0	0	0	0	0	2	2	2
Estradiol 17-beta-dehydrogenase 11 OS=Homo sapiens OX=9606 GN=HSD17B11 PE=1 SV=3	HSD17B11	Q8NBQ5	32936.7	Endoplasmic reticulum {ECO:0000250|UniProtKB:Q9EQ06}. Lipid droplet {ECO:0000250|UniProtKB:Q9EQ06}. Note=Redistributed from the endoplasmic reticulum to lipids droplets in the cell upon induction of lipids droplet formation. {ECO:0000250|UniProtKB:Q9EQ06}.	Can convert androstan-3-alpha,17-beta-diol (3-alpha-diol) to androsterone in vitro, suggesting that it may participate in androgen metabolism during steroidogenesis. May act by metabolizing compounds that stimulate steroid synthesis and/or by generating metabolites that inhibit it. Has no activity toward DHEA (dehydroepiandrosterone), or A-dione (4-androste-3,17-dione), and only a slight activity…	0	3.41954e+06	3.18437e+06	2.70326e+06	3.74741e+06	1.97981e+06	6.25135e+06	4.42146e+06	3.00388e+06	5.1129e+06	4.5653e+06	4.2276e+06	3.30515e+06	0.364042	0.28585	0.429921	0.755124	0.378361	1.01155	0	0	0	0	2	3	0	0	2	0	0	0
Ribosome biogenesis protein BOP1 OS=Homo sapiens OX=9606 GN=BOP1 PE=1 SV=2	BOP1	Q14137	83629.3	Nucleus, nucleolus {ECO:0000255|HAMAP-Rule:MF_03027, ECO:0000269|PubMed:12429849}. Nucleus, nucleoplasm {ECO:0000255|HAMAP-Rule:MF_03027, ECO:0000269|PubMed:12429849}.	Component of the PeBoW complex, which is required for maturation of 28S and 5.8S ribosomal RNAs and formation of the 60S ribosome. {ECO:0000255|HAMAP-Rule:MF_03027, ECO:0000269|PubMed:17353269, ECO:0000269|PubMed:24120868}.	0	1.57327e+06	599784	589854	2.7818e+06	3.2008e+06	2.38277e+06	1.42993e+06	1.73519e+06	553733	2.32452e+06	1.9313e+06	2.01608e+06	1.59824	2.01091	0.42867	0.264226	1.18272	1.55109	0	2	4	3	5	2	0	0	2	0	0	2
ATPase family AAA domain-containing protein 3B OS=Homo sapiens OX=9606 GN=ATAD3B PE=1 SV=1	ATAD3B	Q5T9A4	72574	Mitochondrion inner membrane {ECO:0000269|PubMed:16909202, ECO:0000269|PubMed:18063578}; Peripheral membrane protein {ECO:0000269|PubMed:16909202, ECO:0000269|PubMed:18063578}. Note=Has been found to co-purify with nucleoids (PubMed:22453275). Since it does not face the mitochondrial matrix, the association with nucleoids could be mediated by ATAD3A. {ECO:0000269|PubMed:22453275}.	May play a role in a mitochondrial network organization typical for stem cells, characterized by reduced mitochondrial metabolism, low mtDNA copies and fragmentated mitochondrial network. may act by suppressing ATAD3A function, interfering with ATAD3A interaction with matrix nucleoid complexes. {ECO:0000269|PubMed:22664726}.	0	3.58798e+07	5.31439e+07	4.48288e+07	1.87367e+07	4.55479e+07	2.89043e+07	6.39793e+07	7.02057e+07	4.56603e+07	6.53517e+07	3.99385e+07	5.43694e+07	-0.522413	0.6626	0.426113	0.796214	0.254356	0.411253	11	11	10	11	13	11	15	12	15	12	10	12
RNA polymerase-associated protein CTR9 homolog OS=Homo sapiens OX=9606 GN=CTR9 PE=1 SV=1	CTR9	Q6PD62	133507	Nucleus speckle {ECO:0000250|UniProtKB:Q62018}.	Component of the PAF1 complex (PAF1C) which has multiple functions during transcription by RNA polymerase II and is implicated in regulation of development and maintenance of embryonic stem cell pluripotency. PAF1C associates with RNA polymerase II through interaction with POLR2A CTD non-phosphorylated and 'Ser-2'- and 'Ser-5'-phosphorylated forms and is involved in transcriptional elongation, ac…	0	2.15797e+06	924403	1.29101e+06	1.49104e+06	2.73358e+06	1.82243e+06	2.37473e+06	1.68463e+06	1.81555e+06	2.4971e+06	2.09138e+06	1.76946e+06	0.467477	0.462404	0.425815	0.520303	0.53981	0.7166	0	2	0	0	3	0	0	0	0	0	0	2
pre-rRNA 2'-O-ribose RNA methyltransferase FTSJ3 OS=Homo sapiens OX=9606 GN=FTSJ3 PE=1 SV=2	FTSJ3	Q8IY81	96560.5	Nucleus, nucleolus {ECO:0000255|HAMAP-Rule:MF_03163, ECO:0000269|PubMed:12429849, ECO:0000269|PubMed:22195017}.	RNA 2'-O-methyltransferase involved in the processing of the 34S pre-rRNA to 18S rRNA and in 40S ribosomal subunit formation. {ECO:0000255|HAMAP-Rule:MF_03163, ECO:0000269|PubMed:22195017}.; (Microbial infection) In case of infection by HIV-1 virus, recruited to HIV-1 RNA and catalyzes 2'-O-methylation of the viral genome, allowing HIV-1 virus to escape the innate immune system (PubMed:30626973).…	0	1.66948e+06	1.98125e+06	1.39021e+06	1.7817e+06	1.81116e+06	1.96365e+06	2.05353e+06	3.34655e+06	1.37144e+06	2.01683e+06	1.85252e+06	2.05114e+06	0.140485	0.405352	0.425787	0.405059	0.232024	0.741598	0	0	0	0	2	0	0	0	0	0	0	0
Coatomer subunit delta OS=Homo sapiens OX=9606 GN=ARCN1 PE=1 SV=1	ARCN1	P48444	57211.2	Cytoplasm {ECO:0000250}. Golgi apparatus membrane {ECO:0000250}; Peripheral membrane protein {ECO:0000250}; Cytoplasmic side {ECO:0000250}. Cytoplasmic vesicle, COPI-coated vesicle membrane {ECO:0000250}; Peripheral membrane protein {ECO:0000250}; Cytoplasmic side {ECO:0000250}. Note=The coatomer is cytoplasmic or polymerized on the cytoplasmic side of the Golgi, as well as on the vesicles/buds o…	Component of the coatomer, a cytosolic protein complex that binds to dilysine motifs and reversibly associates with Golgi non-clathrin-coated vesicles, which further mediate biosynthetic protein transport from the ER, via the Golgi up to the trans Golgi network. The coatomer complex is required for budding from Golgi membranes, and is essential for the retrograde Golgi-to-ER transport of dilysine…	0	7.71798e+06	6.76029e+06	6.14685e+06	4.65445e+06	9.56015e+06	8.99947e+06	1.19808e+07	1.13308e+07	4.3574e+06	1.39669e+07	8.06198e+06	6.12532e+06	0.170598	0.206436	0.42387	0.400336	0.448946	0.449627	7	5	5	4	10	4	5	5	2	5	3	4
Secretory carrier-associated membrane protein 3 OS=Homo sapiens OX=9606 GN=SCAMP3 PE=1 SV=3	SCAMP3	O14828	38287.7	Membrane; Multi-pass membrane protein.	Functions in post-Golgi recycling pathways. Acts as a recycling carrier to the cell surface.	TRANSMEM 171..191; /note="Helical"; /evidence="ECO:0000255"; TRANSMEM 197..217; /note="Helical"; /evidence="ECO:0000255"; TRANSMEM 247..267; /note="Helical"; /evidence="ECO:0000255"; TRANSMEM 277..297; /note="Helical"; /evidence="ECO:0000255"	3.34082e+06	4.91481e+06	4.31756e+06	4.37524e+06	2.81787e+06	3.7342e+06	6.83051e+06	4.89883e+06	5.13122e+06	5.52808e+06	4.09386e+06	3.41884e+06	-0.202412	0.354345	0.423303	0.872541	0.0526807	0.070582	2	2	2	2	2	2	2	0	0	0	0	0
Membrane-associated progesterone receptor component 1 OS=Homo sapiens OX=9606 GN=PGRMC1 PE=1 SV=3	PGRMC1	O00264	21672.2	Microsome membrane {ECO:0000250|UniProtKB:Q95250}; Single-pass membrane protein {ECO:0000255}. Smooth endoplasmic reticulum membrane {ECO:0000303|PubMed:28396637}; Single-pass membrane protein {ECO:0000255}. Mitochondrion outer membrane {ECO:0000250|UniProtKB:O55022}; Single-pass membrane protein {ECO:0000305}; Extracellular side {ECO:0000250|UniProtKB:O55022}.	Component of a progesterone-binding protein complex (PubMed:28396637). Binds progesterone (PubMed:25675345). Has many reported cellular functions (heme homeostasis, interaction with CYPs). Required for the maintenance of uterine histoarchitecture and normal female reproductive lifespan (By similarity). Intracellular heme chaperone. Regulates heme synthesis via interactions with FECH and acts as a…	TRANSMEM 25..43; /note="Helical"; /evidence="ECO:0000255"	7.18346e+06	6.63353e+06	9.86064e+06	2.14604e+07	4.91851e+06	1.28149e+07	5.99249e+06	1.20589e+07	1.36839e+07	5.31608e+06	1.30641e+07	5.77168e+06	0.727099	0.457239	0.422563	0.455191	0.028611	0.0194818	4	4	4	6	3	5	3	4	4	2	4	3
Serine/arginine-rich splicing factor 8 OS=Homo sapiens OX=9606 GN=SRSF8 PE=1 SV=1	SRSF8	Q9BRL6	32288.5	Nucleus {ECO:0000269|PubMed:9671500}.	Involved in pre-mRNA alternative splicing. {ECO:0000269|PubMed:9671500}.	0	6.48128e+06	5.14534e+06	6.06357e+06	5.83015e+06	5.11844e+06	5.12949e+06	1.1863e+07	6.56885e+06	5.24381e+06	1.32161e+07	5.87859e+06	9.96554e+06	-0.137855	0.512699	0.420458	0.411538	0.716099	0.812344	2	2	2	2	0	2	2	2	2	2	2	2
Cytoskeleton-associated protein 2 OS=Homo sapiens OX=9606 GN=CKAP2 PE=1 SV=1	CKAP2	Q8WWK9	76987.7	Cytoplasm, cytoskeleton. Cytoplasm, cytoskeleton, spindle. Cytoplasm, cytoskeleton, spindle pole. Note=Contrary to the ectopically expressed protein, endogenous CKAP2 does not colocalize with microtubules in G1, S and early G2. At late G2 and prophase after separation of duplicated centrosomes, colocalizes with gamma-tubulin and centrosome-proximal microtubules. From prometaphase through anaphase…	Possesses microtubule stabilizing properties. Involved in regulating aneuploidy, cell cycling, and cell death in a p53/TP53-dependent manner (By similarity). {ECO:0000250}.	0	793936	908290	1.14732e+06	1.11069e+06	1.20828e+06	955066	1.53559e+06	1.07508e+06	1.20073e+06	1.63196e+06	1.34514e+06	1.79535e+06	0.200337	0.482053	0.419584	0.864948	0.743993	1.72637	2	2	2	0	0	0	2	0	0	0	0	2
Propionyl-CoA carboxylase alpha chain, mitochondrial OS=Homo sapiens OX=9606 GN=PCCA PE=1 SV=4	PCCA	P05165	80059.3	Mitochondrion matrix {ECO:0000269|PubMed:10101253, ECO:0000269|PubMed:16023992}.	This is one of the 2 subunits of the biotin-dependent propionyl-CoA carboxylase (PCC), a mitochondrial enzyme involved in the catabolism of odd chain fatty acids, branched-chain amino acids isoleucine, threonine, methionine, and valine and other metabolites (PubMed:8434582, PubMed:6765947). Propionyl-CoA carboxylase catalyzes the carboxylation of propionyl-CoA/propanoyl-CoA to D-methylmalonyl-CoA…	0	268685337	3.18526e+08	1.93339e+08	1.55639e+08	2.37852e+08	2.20805e+08	3.45433e+08	4.68398e+08	2.28576e+08	7.50008e+08	5.31083e+08	4.04419e+08	-0.345558	0.555987	0.417354	0.485499	1.11062	1.31648	57	62	50	45	57	55	67	69	67	70	63	64
Methylcrotonoyl-CoA carboxylase subunit alpha, mitochondrial OS=Homo sapiens OX=9606 GN=MCCC1 PE=1 SV=3	MCCC1	Q96RQ3	80473.6	Mitochondrion matrix {ECO:0000269|PubMed:16023992}.	Biotin-attachment subunit of the 3-methylcrotonyl-CoA carboxylase, an enzyme that catalyzes the conversion of 3-methylcrotonyl-CoA to 3-methylglutaconyl-CoA, a critical step for leucine and isovaleric acid catabolism. {ECO:0000269|PubMed:17360195}.	0	8.94867e+06	1.02956e+07	8.79427e+06	4.97798e+06	8.85151e+06	7.29247e+06	9.58712e+06	1.99511e+07	7.90044e+06	1.43126e+07	1.45996e+07	1.28195e+07	-0.408668	0.878505	0.417118	0.341358	0.573732	2.47838	4	5	5	3	4	3	5	6	3	3	5	6
Kinesin-like protein KIF22 OS=Homo sapiens OX=9606 GN=KIF22 PE=1 SV=5	KIF22	Q14807	73264.9	Nucleus {ECO:0000269|PubMed:8599929}. Cytoplasm, cytoskeleton {ECO:0000305}.	Kinesin family member that is involved in spindle formation and the movements of chromosomes during mitosis and meiosis. Binds to microtubules and to DNA (By similarity). Plays a role in congression of laterally attached chromosomes in NDC80-depleted cells (PubMed:25743205). {ECO:0000250|UniProtKB:Q9I869, ECO:0000269|PubMed:25743205}.	0	1.78048e+06	1.67058e+06	3.10794e+06	1.84541e+06	1.81908e+06	2.19406e+06	3.0892e+06	2.03549e+06	3.62479e+06	2.42889e+06	2.60894e+06	3.48922e+06	-0.162928	0.1868	0.415722	0.483418	0.378571	0.507077	0	0	0	0	2	0	0	0	0	0	0	0
L-lactate dehydrogenase A chain OS=Homo sapiens OX=9606 GN=LDHA PE=1 SV=2	LDHA	P00338	36689.2	Cytoplasm.	0	0	3.14096e+07	3.89705e+07	3.54419e+07	6.32533e+07	6.28408e+07	4.54379e+07	3.81675e+07	4.51376e+07	5.77831e+07	3.42013e+07	3.83721e+07	4.23516e+07	0.696838	1.60255	0.414959	0.892163	0.119052	0.399985	12	12	15	16	19	14	9	9	19	8	11	13
Mitochondrial import inner membrane translocase subunit TIM50 OS=Homo sapiens OX=9606 GN=TIMM50 PE=1 SV=2	TIMM50	Q3ZCQ8	39647.5	Mitochondrion inner membrane {ECO:0000269|PubMed:15044455}; Single-pass membrane protein {ECO:0000269|PubMed:15044455}.; [Isoform 2]: Nucleus speckle {ECO:0000269|PubMed:16008839}. Note=Nuclear and enriched in speckles with snRNPs. {ECO:0000269|PubMed:16008839}.	Essential component of the TIM23 complex, a complex that mediates the translocation of transit peptide-containing proteins across the mitochondrial inner membrane. Has some phosphatase activity in vitro; however such activity may not be relevant in vivo. {ECO:0000269|PubMed:15044455}.; [Isoform 2]: May participate in the release of snRNPs and SMN from the Cajal body. {ECO:0000269|PubMed:16008839}.	TRANSMEM 66..86; /note="Helical"; /evidence="ECO:0000255"	7.95829e+06	1.259e+07	5.66909e+06	4.64889e+06	4.36149e+06	1.28745e+07	1.26011e+07	1.17469e+07	1.06018e+07	1.82886e+07	1.13314e+07	7.60561e+06	-0.260589	0.156532	0.414764	0.617929	0.505774	0.4186	4	5	4	5	4	4	5	4	4	4	4	4
Cleavage and polyadenylation specificity factor subunit 1 OS=Homo sapiens OX=9606 GN=CPSF1 PE=1 SV=2	CPSF1	Q10570	160886	Nucleus, nucleoplasm.	Component of the cleavage and polyadenylation specificity factor (CPSF) complex that plays a key role in pre-mRNA 3'-end formation, recognizing the AAUAAA signal sequence and interacting with poly(A) polymerase and other factors to bring about cleavage and poly(A) addition. This subunit is involved in the RNA recognition step of the polyadenylation reaction. {ECO:0000269|PubMed:14749727}.	0	2.22858e+06	2.23866e+06	1.50466e+06	2.85616e+06	2.5072e+06	1.92678e+06	2.32595e+06	3.10464e+06	2.524e+06	3.96159e+06	3.05475e+06	2.91619e+06	0.287757	0.531803	0.413599	0.915451	0.733971	1.49736	2	0	0	2	0	0	0	0	0	0	0	0
26S proteasome non-ATPase regulatory subunit 1 OS=Homo sapiens OX=9606 GN=PSMD1 PE=1 SV=2	PSMD1	Q99460	105839	0	Component of the 26S proteasome, a multiprotein complex involved in the ATP-dependent degradation of ubiquitinated proteins. This complex plays a key role in the maintenance of protein homeostasis by removing misfolded or damaged proteins, which could impair cellular functions, and by removing proteins whose functions are no longer required. Therefore, the proteasome participates in numerous cell…	0	3.28337e+06	3.67519e+06	3.20759e+06	4.38337e+06	3.02905e+06	4.85298e+06	4.57813e+06	3.70812e+06	5.25264e+06	4.33856e+06	3.46057e+06	5.95208e+06	0.270821	0.547102	0.413336	1.12504	0.435785	0.736513	0	0	2	2	0	0	0	0	3	0	0	3
Probable ATP-dependent RNA helicase DHX40 OS=Homo sapiens OX=9606 GN=DHX40 PE=1 SV=2	DHX40	Q8IX18	88562.1	0	Probable ATP-dependent RNA helicase. {ECO:0000250}.	0	2.03608e+06	2.39524e+06	1.9458e+06	1.38234e+06	1.77779e+06	2.00122e+06	2.92994e+06	3.3404e+06	2.2191e+06	2.18065e+06	2.00261e+06	2.09411e+06	-0.305153	0.827027	0.412767	0.926481	-0.0227428	0.0800455	0	0	2	2	0	0	0	2	2	0	0	0
Ribosomal L1 domain-containing protein 1 OS=Homo sapiens OX=9606 GN=RSL1D1 PE=1 SV=3	RSL1D1	O76021	54974.7	Nucleus, nucleolus {ECO:0000269|PubMed:11790298, ECO:0000269|PubMed:12429849, ECO:0000269|PubMed:18678645, ECO:0000269|PubMed:22419112}. Note=Colocalizes with ING1 in the nucleolus after UV stress. {ECO:0000269|PubMed:22419112}.	Regulates cellular senescence through inhibition of PTEN translation. Acts as a pro-apoptotic regulator in response to DNA damage. {ECO:0000269|PubMed:18678645, ECO:0000269|PubMed:22419112}.	0	1.28231e+06	2.20241e+06	2.12324e+06	1.99185e+06	2.01299e+06	2.25099e+06	2.11052e+06	3.60477e+06	1.73558e+06	4.36529e+06	3.17859e+06	1.58702e+06	0.157724	0.284709	0.409933	0.405536	0.703278	0.615327	0	0	0	0	0	2	0	0	0	0	0	2
FACT complex subunit SPT16 OS=Homo sapiens OX=9606 GN=SUPT16H PE=1 SV=1	SUPT16H	Q9Y5B9	119917	Nucleus {ECO:0000269|PubMed:10421373}. Chromosome {ECO:0000269|PubMed:10421373}. Note=Colocalizes with RNA polymerase II on chromatin. Recruited to actively transcribed loci.	Component of the FACT complex, a general chromatin factor that acts to reorganize nucleosomes. The FACT complex is involved in multiple processes that require DNA as a template such as mRNA elongation, DNA replication and DNA repair. During transcription elongation the FACT complex acts as a histone chaperone that both destabilizes and restores nucleosomal structure. It facilitates the passage of…	0	3.58403e+06	4.98838e+06	4.46643e+06	6.90573e+06	1.21468e+07	6.42367e+06	4.48065e+06	5.67238e+06	7.16402e+06	1.20888e+07	4.71233e+06	5.91604e+06	0.966334	1.03684	0.409377	0.745778	0.80097	0.625368	0	0	0	3	0	0	0	0	0	0	0	0
Lethal(2) giant larvae protein homolog 1 OS=Homo sapiens OX=9606 GN=LLGL1 PE=1 SV=3	LLGL1	Q15334	115418	Early endosome membrane {ECO:0000250}. Golgi apparatus, trans-Golgi network membrane {ECO:0000250}. Golgi apparatus membrane {ECO:0000250}. Cell projection, axon {ECO:0000250}. Cytoplasm, cytoskeleton {ECO:0000269|PubMed:12725730, ECO:0000269|PubMed:7542763}. Note=Localized to the lateral membrane during the polarization and formation cell-cell contacts. Enriched in developing axons (By similarit…	Cortical cytoskeleton protein found in a complex involved in maintaining cell polarity and epithelial integrity. Involved in the regulation of mitotic spindle orientation, proliferation, differentiation and tissue organization of neuroepithelial cells. Involved in axonogenesis through RAB10 activation thereby regulating vesicular membrane trafficking toward the axonal plasma membrane. {ECO:000026…	0	1.49845e+06	2.40953e+06	1.63524e+06	1.97358e+06	2.17435e+06	2.14736e+06	2.21698e+06	2.06713e+06	3.07122e+06	3.79406e+06	1.92684e+06	2.96402e+06	0.183548	0.359618	0.408066	0.646343	0.647789	0.792639	2	0	2	0	0	0	0	0	0	0	0	0
ATP synthase subunit gamma, mitochondrial OS=Homo sapiens OX=9606 GN=ATP5F1C PE=1 SV=1	ATP5F1C	P36542	32998	Mitochondrion inner membrane {ECO:0000250|UniProtKB:P05631}; Peripheral membrane protein {ECO:0000250|UniProtKB:P05631}; Matrix side {ECO:0000250|UniProtKB:P05631}.	Mitochondrial membrane ATP synthase (F(1)F(0) ATP synthase or Complex V) produces ATP from ADP in the presence of a proton gradient across the membrane which is generated by electron transport complexes of the respiratory chain. F-type ATPases consist of two structural domains, F(1) - containing the extramembraneous catalytic core, and F(0) - containing the membrane proton channel, linked togethe…	0	1.28474e+07	2.01386e+07	9.32746e+06	1.35539e+07	2.10196e+07	2.4067e+07	1.85803e+07	2.07325e+07	1.68115e+07	1.4992e+07	2.08891e+07	1.85468e+07	0.470779	0.53858	0.407506	0.611218	0.363225	0.485937	4	5	5	6	7	7	6	6	5	4	4	5
Ubiquitin carboxyl-terminal hydrolase 10 OS=Homo sapiens OX=9606 GN=USP10 PE=1 SV=2	USP10	Q14694	87134.6	Cytoplasm {ECO:0000269|PubMed:20096447}. Nucleus {ECO:0000269|PubMed:20096447, ECO:0000269|PubMed:24845384}. Early endosome {ECO:0000269|PubMed:19398555}. Note=Cytoplasmic in normal conditions (PubMed:20096447). After DNA damage, translocates to the nucleus following phosphorylation by ATM (PubMed:20096447). {ECO:0000269|PubMed:20096447}.	Hydrolase that can remove conjugated ubiquitin from target proteins such as p53/TP53, BECN1, SNX3 and CFTR. Acts as an essential regulator of p53/TP53 stability: in unstressed cells, specifically deubiquitinates p53/TP53 in the cytoplasm, leading to counteract MDM2 action and stabilize p53/TP53. Following DNA damage, translocates to the nucleus and deubiquitinates p53/TP53, leading to regulate th…	0	3.28058e+06	3.74921e+06	2.72671e+06	4.98038e+06	4.69156e+06	4.89838e+06	4.11819e+06	4.16788e+06	4.65315e+06	5.51011e+06	5.05625e+06	7.85151e+06	0.578598	2.19017	0.407316	1.44481	0.916672	1.46408	0	2	2	2	0	0	0	0	2	0	0	0
HEAT repeat-containing protein 3 OS=Homo sapiens OX=9606 GN=HEATR3 PE=1 SV=2	HEATR3	Q7Z4Q2	74584.9	0	0	0	2.13395e+06	2.86033e+06	2.97923e+06	3.31583e+06	4.62698e+06	5.71966e+06	5.00277e+06	3.76032e+06	1.78826e+06	3.80327e+06	4.46113e+06	4.23468e+06	0.776932	1.19895	0.40414	0.369761	0.648536	2.00231	0	2	3	2	3	3	3	0	2	2	2	3
tRNA methyltransferase 10 homolog C OS=Homo sapiens OX=9606 GN=TRMT10C PE=1 SV=2	TRMT10C	Q7L0Y3	47348.9	Mitochondrion matrix, mitochondrion nucleoid {ECO:0000269|PubMed:18984158, ECO:0000269|PubMed:23473034}.	Mitochondrial tRNA N(1)-methyltransferase involved in mitochondrial tRNA maturation (PubMed:18984158, PubMed:21593607, PubMed:23042678, PubMed:27132592). Component of mitochondrial ribonuclease P, a complex composed of TRMT10C/MRPP1, HSD17B10/MRPP2 and PRORP/MRPP3, which cleaves tRNA molecules in their 5'-ends (PubMed:18984158). Together with HSD17B10/MRPP2, forms a subcomplex of the mitochondria…	0	1.06653e+07	1.31311e+07	1.32222e+07	4.75722e+06	1.18497e+07	1.47595e+07	1.16446e+07	2.3683e+07	1.36234e+07	9.97781e+06	1.27761e+07	1.36735e+07	-0.239037	0.240699	0.403083	0.447858	-0.0232309	0.0485139	4	7	10	4	7	7	7	9	8	5	6	7
Signal peptidase complex subunit 1 OS=Homo sapiens OX=9606 GN=SPCS1 PE=1 SV=5	SPCS1	Q9Y6A9	18298.8	Microsome membrane {ECO:0000250|UniProtKB:P83362}; Multi-pass membrane protein {ECO:0000250|UniProtKB:P83362}. Endoplasmic reticulum membrane {ECO:0000250|UniProtKB:P83362}; Multi-pass membrane protein {ECO:0000250|UniProtKB:P83362}.	Component of the microsomal signal peptidase complex which removes signal peptides from nascent proteins as they are translocated into the lumen of the endoplasmic reticulum. {ECO:0000250|UniProtKB:P83362}.; (Microbial infection) Required for the post-translational processing of proteins involved in virion assembly and secretion from flaviviruses such as West Nile virus (WNV), Japanese encephalit…	TRANSMEM 94..114; /note="Helical"; /evidence="ECO:0000255"; TRANSMEM 116..136; /note="Helical"; /evidence="ECO:0000255"	1.91408e+06	2.14671e+06	2.58051e+06	2.7004e+06	953897	3.01903e+06	2.5737e+06	2.89077e+06	3.30866e+06	1.84731e+06	2.71007e+06	2.9692e+06	0.00694147	0.00521428	0.401626	1.1569	0.180529	0.307358	0	0	0	0	0	0	2	0	0	0	0	0
ATPase family AAA domain-containing protein 1 OS=Homo sapiens OX=9606 GN=ATAD1 PE=1 SV=1	ATAD1	Q8NBU5	40745.1	Peroxisome {ECO:0000250|UniProtKB:Q9D5T0}. Cell junction, synapse, postsynaptic cell membrane {ECO:0000250|UniProtKB:Q9D5T0}.	ATPase that plays a critical role in regulating the surface expression of AMPA receptors (AMPAR), thereby regulating synaptic plasticity and learning and memory. Required for NMDA-stimulated AMPAR internalization and inhibition of GRIA1 and GRIA2 recycling back to the plasma membrane; these activities are ATPase-dependent (By similarity). {ECO:0000250}.	0	1.80108e+06	2.47091e+06	2.04703e+06	2.31034e+06	2.30687e+06	1.71436e+06	3.22539e+06	2.50558e+06	2.60754e+06	2.31177e+06	1.72181e+06	2.04781e+06	0.0028663	0.00492864	0.40009	1.06136	-0.0552959	0.110427	2	2	0	0	0	2	2	0	2	0	0	0
26S proteasome non-ATPase regulatory subunit 12 OS=Homo sapiens OX=9606 GN=PSMD12 PE=1 SV=3	PSMD12	O00232	52906.2	0	Component of the 26S proteasome, a multiprotein complex involved in the ATP-dependent degradation of ubiquitinated proteins. This complex plays a key role in the maintenance of protein homeostasis by removing misfolded or damaged proteins, which could impair cellular functions, and by removing proteins whose functions are no longer required. Therefore, the proteasome participates in numerous cell…	0	3.21803e+06	4.08931e+06	4.83369e+06	2.82732e+06	6.80105e+06	4.82318e+06	6.17344e+06	5.53519e+06	4.3084e+06	3.12219e+06	5.6717e+06	4.18518e+06	0.251332	0.245864	0.399715	0.832949	0.0962958	0.116131	3	4	4	3	6	4	4	3	3	2	0	0
Succinate--CoA ligase [ADP-forming] subunit beta, mitochondrial OS=Homo sapiens OX=9606 GN=SUCLA2 PE=1 SV=3	SUCLA2	Q9P2R7	50318.1	Mitochondrion {ECO:0000255|HAMAP-Rule:MF_03220, ECO:0000269|PubMed:15877282, ECO:0000269|PubMed:17287286, ECO:0000269|PubMed:25944712}.	ATP-specific succinyl-CoA synthetase functions in the citric acid cycle (TCA), coupling the hydrolysis of succinyl-CoA to the synthesis of ATP and thus represents the only step of substrate-level phosphorylation in the TCA (PubMed:15877282). The beta subunit provides nucleotide specificity of the enzyme and binds the substrate succinate, while the binding sites for coenzyme A and phosphate are fo…	0	1.48544e+07	6.59782e+06	5.38908e+06	7.12359e+06	9.80371e+06	1.04857e+07	1.16471e+07	1.64271e+07	7.33153e+06	4.0404e+06	7.49795e+06	8.94921e+06	0.0304039	0.0201741	0.399527	0.291016	-0.389706	0.253956	4	3	3	0	4	4	4	3	4	2	0	3
Signal recognition particle 54 kDa protein OS=Homo sapiens OX=9606 GN=SRP54 PE=1 SV=1	SRP54	P61011	55706.3	Nucleus speckle {ECO:0000269|PubMed:14729963}. Cytoplasm {ECO:0000269|PubMed:14729963, ECO:0000269|PubMed:29914977}. Endoplasmic reticulum {ECO:0000269|PubMed:29914977}.	Binds to the signal sequence of presecretory protein when they emerge from the ribosomes and transfers them to TRAM (translocating chain-associating membrane protein). Plays a role in proliferation and differentiation of granulocytic cells, neutrophils migration capacity and exocrine pancreas development (PubMed:29914977, PubMed:28972538). {ECO:0000269|PubMed:28972538, ECO:0000269|PubMed:29914977…	0	2.81998e+06	3.30522e+06	2.58446e+06	3.03697e+06	3.43856e+06	4.84944e+06	3.80222e+06	4.18951e+06	3.49242e+06	3.84767e+06	3.69733e+06	3.2768e+06	0.37882	0.671549	0.398957	1.46595	0.313254	1.21441	3	2	3	0	3	4	0	2	0	2	0	2
DDB1- and CUL4-associated factor 1 OS=Homo sapiens OX=9606 GN=DCAF1 PE=1 SV=3	DCAF1	Q9Y4B6	169011	Cytoplasm. Nucleus. Note=Associated with chromatin in a DDB1-independent and cell cycle-dependent manner: recruited to chromatin as DNA is being replicated and is released from chromatin before mitosis.	Acts both as a substrate recognition component of E3 ubiquitin-protein ligase complexes and as an atypical serine/threonine-protein kinase, playing key roles in various processes such as cell cycle, telomerase regulation and histone modification. Probable substrate-specific adapter of a DCX (DDB1-CUL4-X-box) E3 ubiquitin-protein ligase complex, named CUL4A-RBX1-DDB1-DCAF1/VPRBP complex, which med…	0	2.61887e+06	3.82386e+06	9.3202e+06	7.83106e+06	7.64695e+06	8.6208e+06	4.72951e+06	5.65634e+06	1.03917e+07	4.99492e+06	5.01803e+06	6.39666e+06	0.612426	0.596373	0.398488	0.24386	0.0580044	0.0344749	2	2	8	6	7	6	3	3	6	0	2	4
Phosphatidylserine synthase 2 OS=Homo sapiens OX=9606 GN=PTDSS2 PE=1 SV=1	PTDSS2	Q9BVG9	56254.4	Endoplasmic reticulum membrane {ECO:0000250}; Multi-pass membrane protein {ECO:0000250}. Note=Highly enriched in the mitochondria-associated membrane (MAM). {ECO:0000250}.	Catalyzes a base-exchange reaction in which the polar head group of phosphatidylethanolamine (PE) or phosphatidylcholine (PC) is replaced by L-serine. PTDSS2 is specific for phosphatatidylethanolamine and does not act on phosphatidylcholine.	TRANSMEM 63..83; /note="Helical"; /evidence="ECO:0000255"; TRANSMEM 97..117; /note="Helical"; /evidence="ECO:0000255"; TRANSMEM 127..147; /note="Helical"; /evidence="ECO:0000255"; TRANSMEM 314..334; /note="Helical"; /evidence="ECO:0000255"; TRANSMEM 336..356; /note="Helical"; /evidence="ECO:0000255"; TRANSMEM 377..397; /note="Helical"; /evidence="ECO:0000255"; TRANSMEM 404..424; /note="Helical"; …	1.84727e+06	2.144e+06	2.04567e+06	2.779e+06	1.65475e+06	2.61727e+06	2.58442e+06	2.26947e+06	3.09632e+06	1.76303e+06	1.86647e+06	2.70319e+06	0.224016	0.394901	0.397176	1.17022	0.0690017	0.11548	0	0	0	0	0	2	0	0	0	0	0	0
60S ribosomal protein L10a OS=Homo sapiens OX=9606 GN=RPL10A PE=1 SV=2	RPL10A	P62906	24832	0	Component of the large ribosomal subunit. {ECO:0000305|PubMed:12962325}.	0	6.71134e+06	5.46893e+06	3.20454e+06	5.01495e+06	5.02629e+06	8.08641e+06	4.30572e+06	1.06988e+07	5.22884e+06	5.70444e+06	4.26603e+06	2.51494e+06	0.236685	0.250119	0.395227	0.291435	-0.301264	0.282084	4	3	2	3	0	4	2	5	3	0	2	2
Eukaryotic translation initiation factor 3 subunit I OS=Homo sapiens OX=9606 GN=EIF3I PE=1 SV=1	EIF3I	Q13347	36502	Cytoplasm {ECO:0000255|HAMAP-Rule:MF_03008}.	Component of the eukaryotic translation initiation factor 3 (eIF-3) complex, which is required for several steps in the initiation of protein synthesis (PubMed:17581632, PubMed:25849773, PubMed:27462815). The eIF-3 complex associates with the 40S ribosome and facilitates the recruitment of eIF-1, eIF-1A, eIF-2:GTP:methionyl-tRNAi and eIF-5 to form the 43S pre-initiation complex (43S PIC). The eIF…	0	2.06442e+06	1.815e+06	1.6462e+06	1.77682e+06	1.92399e+06	2.37974e+06	1.98662e+06	1.67221e+06	3.6071e+06	3.1992e+06	2.123e+06	3.60941e+06	0.138066	0.351937	0.395014	0.401626	0.692785	1.16171	2	0	3	0	2	0	0	0	3	0	0	3
Dedicator of cytokinesis protein 7 OS=Homo sapiens OX=9606 GN=DOCK7 PE=1 SV=4	DOCK7	Q96N67	242566	Cell projection, axon {ECO:0000269|PubMed:16982419}. Note=Enriched in the developing axons of hippocampal neurons.	Functions as a guanine nucleotide exchange factor (GEF), which activates Rac1 and Rac3 Rho small GTPases by exchanging bound GDP for free GTP. Does not have a GEF activity for CDC42. Required for STMN1 'Ser-15' phosphorylation during axon formation and consequently for neuronal polarization (PubMed:16982419). As part of the DISP complex, may regulate the association of septins with actin and ther…	0	2.22065e+06	2.73737e+06	1.39759e+06	529296	1.22803e+06	2.76302e+06	2.5433e+06	2.11224e+06	3.69626e+06	2.89476e+06	2.08756e+06	1.70975e+06	-0.491597	0.328397	0.394057	0.470124	0.0744213	0.0752448	0	2	3	3	2	3	0	0	5	0	0	2
DNA repair protein complementing XP-C cells OS=Homo sapiens OX=9606 GN=XPC PE=1 SV=4	XPC	Q01831	105955	Nucleus {ECO:0000269|PubMed:11279143, ECO:0000269|PubMed:18682493, ECO:0000269|PubMed:8692695}. Chromosome {ECO:0000269|PubMed:29973595}. Cytoplasm {ECO:0000269|PubMed:18682493}. Note=Omnipresent in the nucleus and consistently associates with and dissociates from DNA in the absence of DNA damage (PubMed:18682493). Continuously shuttles between the cytoplasm and the nucleus, which is impeded by t…	Involved in global genome nucleotide excision repair (GG-NER) by acting as damage sensing and DNA-binding factor component of the XPC complex (PubMed:10734143, PubMed:19609301, PubMed:20649465, PubMed:9734359, PubMed:10873465, PubMed:12509299, PubMed:12547395, PubMed:19941824, PubMed:20028083, PubMed:20798892). Has only a low DNA repair activity by itself which is stimulated by RAD23B and RAD23A.…	0	2.44299e+06	2.76812e+06	1.77659e+06	3.21854e+06	2.38231e+06	2.26624e+06	2.23867e+06	3.91007e+06	3.01825e+06	3.07243e+06	2.74108e+06	2.16127e+06	0.171012	0.282115	0.39163	0.572926	0.190626	0.345096	0	0	0	3	0	0	0	0	0	0	0	0
Glutamine amidotransferase-like class 1 domain-containing protein 3B, mitochondrial OS=Homo sapiens OX=9606 GN=GATD3B PE=1 SV=1	GATD3B	A0A0B4J2D5,P0DPI2	28141.6	#N/A	#N/A	#N/A	2.8777e+06	4.20775e+06	3.19076e+06	2.65302e+06	4.24179e+06	3.11403e+06	4.29583e+06	3.24652e+06	5.93687e+06	5.1222e+06	3.35046e+06	5.57115e+06	-0.0380309	0.0493497	0.39143	0.535085	0.450627	0.730113	0	0	0	2	0	2	0	0	0	0	0	0
Tyrosine-protein kinase CSK OS=Homo sapiens OX=9606 GN=CSK PE=1 SV=1	CSK	P41240	50705	Cytoplasm {ECO:0000250}. Cell membrane {ECO:0000250}. Note=Mainly cytoplasmic, also present in lipid rafts. {ECO:0000250}.	Non-receptor tyrosine-protein kinase that plays an important role in the regulation of cell growth, differentiation, migration and immune response. Phosphorylates tyrosine residues located in the C-terminal tails of Src-family kinases (SFKs) including LCK, SRC, HCK, FYN, LYN, CSK or YES1. Upon tail phosphorylation, Src-family members engage in intramolecular interactions between the phosphotyrosi…	0	1.09789e+06	1.47101e+06	742831	1.34758e+06	1.30781e+06	1.04627e+06	1.87028e+06	1.48249e+06	987690	1.60212e+06	1.26123e+06	1.14187e+06	0.160587	0.219729	0.390263	0.44555	0.274297	0.387326	0	2	2	0	0	0	0	0	0	0	0	3
Glutamine--fructose-6-phosphate aminotransferase [isomerizing] 1 OS=Homo sapiens OX=9606 GN=GFPT1 PE=1 SV=3	GFPT1	Q06210	78807.7	0	Controls the flux of glucose into the hexosamine pathway. Most likely involved in regulating the availability of precursors for N- and O-linked glycosylation of proteins. Regulates the circadian expression of clock genes ARNTL/BMAL1 and CRY1.	0	2.55381e+06	4.22489e+06	6.52066e+06	4.96746e+06	4.50293e+06	5.73494e+06	4.21734e+06	4.53857e+06	8.6671e+06	4.95182e+06	4.12402e+06	5.45322e+06	0.19322	0.203549	0.389637	0.304591	0.127585	0.123499	3	4	6	4	4	5	4	0	7	0	3	4
Isoleucine--tRNA ligase, mitochondrial OS=Homo sapiens OX=9606 GN=IARS2 PE=1 SV=2	IARS2	Q9NSE4	113794	Mitochondrion matrix {ECO:0000250}.	0	0	5.70177e+07	5.43735e+07	4.7795e+07	3.49313e+07	5.02803e+07	5.50379e+07	6.99126e+07	8.05687e+07	5.80165e+07	7.69345e+07	5.18916e+07	4.8518e+07	-0.182722	0.401483	0.389316	1.09358	0.155835	0.256789	27	22	25	20	27	27	27	28	30	19	19	21
ATP-dependent RNA helicase SUPV3L1, mitochondrial OS=Homo sapiens OX=9606 GN=SUPV3L1 PE=1 SV=1	SUPV3L1	Q8IYB8	87994.8	Nucleus {ECO:0000269|PubMed:17352692}. Mitochondrion matrix {ECO:0000269|PubMed:12466530, ECO:0000269|PubMed:17352692, ECO:0000269|PubMed:19864255}. Mitochondrion matrix, mitochondrion nucleoid {ECO:0000269|PubMed:18063578}.	Major helicase player in mitochondrial RNA metabolism. Component of the mitochondrial degradosome (mtEXO) complex, that degrades 3' overhang double-stranded RNA with a 3'-to-5' directionality in an ATP-dependent manner. Involved in the degradation of non-coding mitochondrial transcripts (MT-ncRNA) and tRNA-like molecules (PubMed:29967381). ATPase and ATP-dependent multisubstrate helicase, able to…	0	2.87066e+06	3.45615e+06	3.02914e+06	3.40155e+06	3.8091e+06	4.16856e+06	4.19939e+06	4.96635e+06	3.06648e+06	5.70433e+06	4.71724e+06	3.98684e+06	0.282444	1.12375	0.38673	0.76194	0.622956	1.47988	0	0	0	0	2	0	0	0	0	0	0	0
Afadin OS=Homo sapiens OX=9606 GN=AFDN PE=1 SV=3	AFDN	P55196	206808	Cell junction, adherens junction {ECO:0000269|PubMed:30463011}. Note=Not found at cell-matrix AJs. {ECO:0000250|UniProtKB:O35889}.	Belongs to an adhesion system, probably together with the E-cadherin-catenin system, which plays a role in the organization of homotypic, interneuronal and heterotypic cell-cell adherens junctions (AJs) (By similarity). Nectin- and actin-filament-binding protein that connects nectin to the actin cytoskeleton (PubMed:11024295). May play a key role in the organization of epithelial structures of th…	0	1.9413e+06	334672	356856	1.08213e+06	5.46312e+06	1.38487e+06	1.53178e+06	1.64281e+06	265719	1.78844e+06	1.03219e+06	1.68553e+06	1.59073	0.512845	0.385928	0.144555	0.775286	0.463594	2	2	2	0	5	0	0	0	2	0	0	0
decoy_sp|Q9H324|ATS10_HUMAN	#VALUE!	decoy_sp|Q9H324|ATS10_HUMAN	0	#N/A	#N/A	#N/A	2.29063e+06	2.46411e+06	2.30125e+06	2.85522e+06	2.89902e+06	2.73269e+06	2.61526e+06	3.92006e+06	2.67932e+06	5.22079e+06	3.24778e+06	3.5126e+06	0.266396	2.50336	0.385078	0.773927	0.763849	1.24174	0	0	0	2	0	0	0	0	0	0	0	0
decoy_sp|P52179|MYOM1_HUMAN	#VALUE!	decoy_sp|P52179|MYOM1_HUMAN	0	#N/A	#N/A	#N/A	1.64509e+07	2.41377e+07	1.63314e+07	1.55391e+07	1.98562e+07	3.31287e+07	2.5705e+07	2.55596e+07	2.30287e+07	2.7424e+07	2.32036e+07	2.25605e+07	0.267671	0.26188	0.384296	0.996863	0.36267	0.838982	5	4	5	5	0	5	0	0	0	0	0	0
L-aminoadipate-semialdehyde dehydrogenase-phosphopantetheinyl transferase OS=Homo sapiens OX=9606 GN=AASDHPPT PE=1 SV=2	AASDHPPT	Q9NRN7	35777.1	Cytoplasm {ECO:0000269|PubMed:12815048}.	Catalyzes the post-translational modification of target proteins by phosphopantetheine. Can transfer the 4'-phosphopantetheine moiety from coenzyme A to a serine residue of a broad range of acceptors, such as the acyl carrier domain of FASN. {ECO:0000269|PubMed:11286508, ECO:0000269|PubMed:12815048, ECO:0000269|PubMed:18022563}.	0	2.3527e+06	3.10169e+06	2.06912e+06	2.64164e+06	1.28481e+06	2.33406e+06	2.44808e+06	2.55667e+06	4.8072e+06	3.08816e+06	2.79068e+06	3.38014e+06	-0.265125	0.338904	0.383136	0.388063	0.299448	0.75566	0	2	2	2	2	2	0	0	2	0	0	2
CCR4-NOT transcription complex subunit 1 OS=Homo sapiens OX=9606 GN=CNOT1 PE=1 SV=2	CNOT1	A5YKK6	266945	Cytoplasm, P-body {ECO:0000269|PubMed:21976065}. Nucleus {ECO:0000305|PubMed:21976065}. Note=NANOS2 promotes its localization to P-body. {ECO:0000250|UniProtKB:Q6ZQ08}.	Scaffolding component of the CCR4-NOT complex which is one of the major cellular mRNA deadenylases and is linked to various cellular processes including bulk mRNA degradation, miRNA-mediated repression, translational repression during translational initiation and general transcription regulation. Additional complex functions may be a consequence of its influence on mRNA expression. Its scaffoldin…	0	1.20408e+06	1.83432e+06	1.96902e+06	2.46941e+06	1.99705e+06	2.04391e+06	2.37409e+06	2.76263e+06	1.39153e+06	2.37372e+06	1.37935e+06	1.55697e+06	0.37867	0.830886	0.382628	0.465252	0.0846527	0.0931505	2	0	0	0	2	0	0	0	0	0	0	2
GPI transamidase component PIG-T OS=Homo sapiens OX=9606 GN=PIGT PE=1 SV=1	PIGT	Q969N2	65701.3	Endoplasmic reticulum membrane {ECO:0000269|PubMed:11483512}; Single-pass type I membrane protein {ECO:0000269|PubMed:11483512}.	Component of the GPI transamidase complex. Essential for transfer of GPI to proteins, particularly for formation of carbonyl intermediates. {ECO:0000269|PubMed:11483512}.	TRANSMEM 528..548; /note="Helical"; /evidence="ECO:0000255"	1.19325e+06	1.287e+06	1.19201e+06	1.09979e+06	790303	1.46841e+06	1.50714e+06	1.72896e+06	1.54982e+06	1.28851e+06	1.29828e+06	1.47012e+06	-0.128849	0.203314	0.382129	2.11236	0.143711	0.894353	0	2	3	0	0	0	0	0	0	0	0	0
Apoptosis-inducing factor 1, mitochondrial OS=Homo sapiens OX=9606 GN=AIFM1 PE=1 SV=1	AIFM1	O95831	66901.5	Mitochondrion intermembrane space {ECO:0000269|PubMed:15775970, ECO:0000269|PubMed:24914854, ECO:0000269|PubMed:26004228}. Mitochondrion inner membrane. Cytoplasm {ECO:0000269|PubMed:15775970}. Nucleus {ECO:0000269|PubMed:15775970, ECO:0000269|PubMed:17094969}. Cytoplasm, perinuclear region {ECO:0000269|PubMed:17094969}. Note=Proteolytic cleavage during or just after translocation into the mitoch…	Functions both as NADH oxidoreductase and as regulator of apoptosis (PubMed:20362274, PubMed:23217327, PubMed:17094969). In response to apoptotic stimuli, it is released from the mitochondrion intermembrane space into the cytosol and to the nucleus, where it functions as a proapoptotic factor in a caspase-independent pathway. The soluble form (AIFsol) found in the nucleus induces 'parthanatos' i.…	0	4.03374e+07	6.28829e+07	4.98161e+07	6.11201e+07	5.71893e+07	6.10076e+07	5.87094e+07	7.10976e+07	6.96392e+07	4.65583e+07	6.38489e+07	4.69311e+07	0.228637	0.586938	0.382125	0.95063	0.039996	0.0571461	12	15	20	16	19	18	16	14	19	11	13	16
28S rRNA (cytosine-C(5))-methyltransferase OS=Homo sapiens OX=9606 GN=NSUN5 PE=1 SV=2	NSUN5	Q96P11	46692.6	Nucleus, nucleolus {ECO:0000269|PubMed:31722427}.	S-adenosyl-L-methionine-dependent methyltransferase that specifically methylates the C(5) position of cytosine 3782 (m5C3782) in 28S rRNA (PubMed:23913415, PubMed:31428936, PubMed:31722427). m5C3782 promotes protein translation without affecting ribosome biogenesis and fidelity (PubMed:31428936, PubMed:31722427). Required for corpus callosum and cerebral cortex development (By similarity). {ECO:0…	0	1.35638e+06	1.67382e+06	865862	1.40235e+06	1.63947e+06	1.55744e+06	1.58404e+06	2.13501e+06	1.35651e+06	1.863e+06	1.80775e+06	2.16998e+06	0.239387	0.405585	0.38155	0.524535	0.584134	1.16949	0	0	2	0	0	0	0	0	0	0	0	0
U2 small nuclear ribonucleoprotein A' OS=Homo sapiens OX=9606 GN=SNRPA1 PE=1 SV=2	SNRPA1	P09661	28417.1	Nucleus {ECO:0000269|PubMed:11991638, ECO:0000269|PubMed:28076346, ECO:0000269|PubMed:28502770, ECO:0000269|PubMed:28781166}.	Involved in pre-mRNA splicing as component of the spliceosome (PubMed:11991638, PubMed:28502770, PubMed:28781166, PubMed:28076346, PubMed:27035939). Associated with sn-RNP U2, where it contributes to the binding of stem loop IV of U2 snRNA (PubMed:9716128, PubMed:27035939). {ECO:0000269|PubMed:11991638, ECO:0000269|PubMed:27035939, ECO:0000269|PubMed:28076346, ECO:0000269|PubMed:28502770, ECO:000…	0	1.78982e+06	5.40734e+06	5.87474e+06	6.82077e+06	6.08081e+06	6.00623e+06	6.45951e+06	6.18739e+06	4.36437e+06	8.24039e+06	4.76647e+06	7.10633e+06	0.532513	0.670322	0.380022	0.380919	0.621673	0.643518	2	4	4	3	3	2	0	0	3	0	0	0
Transmembrane protein 33 OS=Homo sapiens OX=9606 GN=TMEM33 PE=1 SV=2	TMEM33	P57088	27979.7	Endoplasmic reticulum membrane {ECO:0000269|PubMed:25612671, ECO:0000269|PubMed:26268696}; Multi-pass membrane protein {ECO:0000255}. Melanosome {ECO:0000269|PubMed:17081065}. Nucleus envelope {ECO:0000269|PubMed:25612671}. Note=Identified by mass spectrometry in melanosome fractions from stage I to stage IV. Co-localizes with RTN4 at the ER sheets. {ECO:0000269|PubMed:17081065, ECO:0000269|PubMe…	Acts as a regulator of the tubular endoplasmic reticulum (ER) network. Suppresses the RTN3/4-induced formation of the ER tubules (PubMed:25612671). Positively regulates PERK-mediated and IRE1-mediated unfolded protein response signaling (PubMed:26268696). {ECO:0000269|PubMed:25612671, ECO:0000269|PubMed:26268696}.	TRANSMEM 32..52; /note="Helical"; /evidence="ECO:0000255"; TRANSMEM 101..121; /note="Helical"; /evidence="ECO:0000255"; TRANSMEM 156..176; /note="Helical"; /evidence="ECO:0000255"	1.57995e+07	5.96369e+06	9.84613e+06	9.71362e+06	6.00627e+06	6.95235e+06	1.56746e+07	1.62179e+07	9.18636e+06	1.02836e+07	1.07657e+07	1.36997e+07	-0.479422	0.412677	0.378046	0.361209	0.136623	0.125517	2	2	2	0	2	2	3	3	3	0	0	2
14-3-3 protein epsilon OS=Homo sapiens OX=9606 GN=YWHAE PE=1 SV=1	YWHAE	P62258	29175	Nucleus {ECO:0000269|PubMed:12917326}. Cytoplasm {ECO:0000269|PubMed:12917326}. Melanosome {ECO:0000269|PubMed:12042314, ECO:0000269|PubMed:17081065}. Note=Identified by mass spectrometry in melanosome fractions from stage I to stage IV. {ECO:0000269|PubMed:12042314, ECO:0000269|PubMed:17081065}.	Adapter protein implicated in the regulation of a large spectrum of both general and specialized signaling pathways. Binds to a large number of partners, usually by recognition of a phosphoserine or phosphothreonine motif. Binding generally results in the modulation of the activity of the binding partner (By similarity). Positively regulates phosphorylated protein HSF1 nuclear export to the cytop…	0	1.02832e+07	1.6241e+07	1.33925e+07	1.03665e+07	9.92328e+06	1.09597e+07	1.81816e+07	2.09101e+07	1.26528e+07	1.4864e+07	1.56239e+07	1.25713e+07	-0.353162	0.760926	0.374413	0.591899	0.109331	0.207898	0	4	0	5	5	0	3	3	0	0	3	3
Isocitrate dehydrogenase [NAD] subunit beta, mitochondrial OS=Homo sapiens OX=9606 GN=IDH3B PE=1 SV=2	IDH3B	O43837	42183.6	Mitochondrion.	Plays a structural role to facilitate the assembly and ensure the full activity of the enzyme catalyzing the decarboxylation of isocitrate (ICT) into alpha-ketoglutarate. The heterodimer composed of the alpha (IDH3A) and beta (IDH3B) subunits and the heterodimer composed of the alpha (IDH3A) and gamma (IDH3G) subunits, have considerable basal activity but the full activity of the heterotetramer (…	0	1.31577e+07	1.10162e+07	1.07718e+07	7.98038e+06	5.62283e+06	1.3911e+07	1.2785e+07	2.20413e+07	10307063	3.62212e+06	9.75705e+06	1.05705e+07	-0.344937	0.407528	0.369079	0.392671	-0.545113	0.722752	6	5	5	6	5	6	7	7	7	3	5	6
Creatine kinase U-type, mitochondrial OS=Homo sapiens OX=9606 GN=CKMT1A PE=1 SV=1	CKMT1A	P12532	47038	Mitochondrion inner membrane; Peripheral membrane protein; Intermembrane side.	Reversibly catalyzes the transfer of phosphate between ATP and various phosphogens (e.g. creatine phosphate). Creatine kinase isoenzymes play a central role in energy transduction in tissues with large, fluctuating energy demands, such as skeletal muscle, heart, brain and spermatozoa.	0	2.7226e+06	1.56064e+06	1.94725e+06	3.57424e+06	1.98905e+06	2.57517e+06	2.63759e+06	2.29001e+06	3.11726e+06	1.74364e+06	2.22407e+06	2.42432e+06	0.385414	0.480327	0.368725	0.655731	0.036931	0.0464233	0	0	2	2	0	0	0	0	0	0	0	0
NADH dehydrogenase [ubiquinone] flavoprotein 1, mitochondrial OS=Homo sapiens OX=9606 GN=NDUFV1 PE=1 SV=4	NDUFV1	P49821	50817.8	Mitochondrion inner membrane; Peripheral membrane protein; Matrix side.	Core subunit of the mitochondrial membrane respiratory chain NADH dehydrogenase (Complex I) that is believed to belong to the minimal assembly required for catalysis. Complex I functions in the transfer of electrons from NADH to the respiratory chain. The immediate electron acceptor for the enzyme is believed to be ubiquinone (By similarity). {ECO:0000250}.	0	2.01101e+06	1.13391e+06	1.9434e+06	1.45789e+06	1.19174e+06	2.61655e+06	1.5253e+06	1.51942e+06	3.52102e+06	1.20708e+06	2.31271e+06	2.53749e+06	0.0495678	0.0386895	0.367767	0.272979	0.25148	0.257817	0	2	0	0	0	0	0	0	0	0	0	0
Nucleoside diphosphate kinase A OS=Homo sapiens OX=9606 GN=NME1 PE=1 SV=1	NME1	P15531	17148.8	Cytoplasm {ECO:0000269|PubMed:16442775}. Nucleus {ECO:0000269|PubMed:16442775}. Note=Cell-cycle dependent nuclear localization which can be induced by interaction with Epstein-barr viral proteins or by degradation of the SET complex by GzmA.	Major role in the synthesis of nucleoside triphosphates other than ATP. The ATP gamma phosphate is transferred to the NDP beta phosphate via a ping-pong mechanism, using a phosphorylated active-site intermediate. Possesses nucleoside-diphosphate kinase, serine/threonine-specific protein kinase, geranyl and farnesyl pyrophosphate kinase, histidine protein kinase and 3'-5' exonuclease activities. I…	0	5.96561e+06	7.02898e+06	4.8231e+06	5.10277e+06	9.58363e+06	2.84488e+06	7.834e+06	1.30617e+07	2.05212e+06	1.09936e+07	1.12257e+07	5.84409e+06	-0.023379	0.0152055	0.365045	0.203532	0.655379	0.849029	0	4	3	0	5	3	5	5	3	3	4	3
Serine/arginine repetitive matrix protein 1 OS=Homo sapiens OX=9606 GN=SRRM1 PE=1 SV=2	SRRM1	Q8IYB3	102338	Nucleus matrix {ECO:0000269|PubMed:12624182, ECO:0000269|PubMed:9531537}. Nucleus speckle {ECO:0000269|PubMed:11546874, ECO:0000269|PubMed:9531537}.	Part of pre- and post-splicing multiprotein mRNP complexes. Involved in numerous pre-mRNA processing events. Promotes constitutive and exonic splicing enhancer (ESE)-dependent splicing activation by bridging together sequence-specific (SR family proteins, SFRS4, SFRS5 and TRA2B/SFRS10) and basal snRNP (SNRP70 and SNRPA1) factors of the spliceosome. Stimulates mRNA 3'-end cleavage independently of…	0	1.09581e+07	1.03483e+07	5.19524e+06	5.94241e+06	3.33608e+06	3.18128e+06	1.16051e+07	1.29133e+07	9.60046e+06	1.45251e+07	1.06205e+07	7.1779e+06	-1.0888	1.08101	0.36449	0.542935	0.286504	0.278579	8	7	5	5	4	4	5	5	8	5	5	5
Cullin-1 OS=Homo sapiens OX=9606 GN=CUL1 PE=1 SV=2	CUL1	Q13616	89681.4	0	Core component of multiple cullin-RING-based SCF (SKP1-CUL1-F-box protein) E3 ubiquitin-protein ligase complexes, which mediate the ubiquitination of proteins involved in cell cycle progression, signal transduction and transcription. SCF complexes and ARIH1 collaborate in tandem to mediate ubiquitination of target proteins (PubMed:27565346). In the SCF complex, serves as a rigid scaffold that org…	0	2.67868e+06	3.15692e+06	1.91489e+06	4.94709e+06	1.77023e+06	4.48167e+06	3.65062e+06	3.20754e+06	3.10346e+06	2.21304e+06	2.67692e+06	3.67697e+06	0.531008	0.47244	0.362092	0.859465	0.144491	0.184222	4	5	4	5	4	4	4	0	4	2	0	4
Desmoglein-1 OS=Homo sapiens OX=9606 GN=DSG1 PE=1 SV=2	DSG1	Q02413	113749	Cell membrane {ECO:0000250}; Single-pass type I membrane protein {ECO:0000250}. Cell junction, desmosome.	Component of intercellular desmosome junctions. Involved in the interaction of plaque proteins and intermediate filaments mediating cell-cell adhesion.	TRANSMEM 549..569; /note="Helical"; /evidence="ECO:0000255"	3.75557e+06	5.19218e+06	3.59717e+06	5.1196e+06	6.73134e+06	4.60775e+06	6.44206e+06	5.50854e+06	4.15902e+06	8.31767e+06	6.51603e+06	7.35803e+06	0.391746	0.731973	0.360819	0.642779	0.82292	1.94032	0	0	0	0	0	0	0	0	0	0	4	0
Desmoglein-2 OS=Homo sapiens OX=9606 GN=DSG2 PE=1 SV=2	DSG2	Q14126	122294	Cell membrane; Single-pass type I membrane protein. Cell junction, desmosome.	Component of intercellular desmosome junctions. Involved in the interaction of plaque proteins and intermediate filaments mediating cell-cell adhesion.	TRANSMEM 610..634; /note="Helical"; /evidence="ECO:0000255"	1.38483e+06	1.5381e+06	1.41287e+06	1.49153e+06	797558	1.17235e+06	1.81824e+06	1.50531e+06	2.24008e+06	1.27381e+06	1.11029e+06	1.87618e+06	-0.324929	0.638191	0.359729	0.873781	-0.0253489	0.0358697	0	0	0	2	0	0	0	0	0	0	0	0
Peroxiredoxin-1 OS=Homo sapiens OX=9606 GN=PRDX1 PE=1 SV=1	PRDX1	Q06830	22110.9	Cytoplasm {ECO:0000269|PubMed:17081065, ECO:0000269|PubMed:9497357}. Melanosome {ECO:0000269|PubMed:17081065}. Note=Identified by mass spectrometry in melanosome fractions from stage I to stage IV.	Thiol-specific peroxidase that catalyzes the reduction of hydrogen peroxide and organic hydroperoxides to water and alcohols, respectively. Plays a role in cell protection against oxidative stress by detoxifying peroxides and as sensor of hydrogen peroxide-mediated signaling events. Might participate in the signaling cascades of growth factors and tumor necrosis factor-alpha by regulating the int…	0	5.47556e+07	5.04157e+07	2.44118e+07	3.55995e+07	3.59203e+07	4.25014e+07	5.76735e+07	7.22604e+07	3.62569e+07	8.28489e+07	9.49867e+07	6.71501e+07	-0.184574	0.205888	0.358964	0.360605	0.918821	1.43804	8	8	7	7	6	8	6	8	8	6	8	9
Mitochondrial amidoxime-reducing component 1 OS=Homo sapiens OX=9606 GN=MTARC1 PE=1 SV=1	MTARC1	Q5VT66	37500.1	Mitochondrion outer membrane {ECO:0000269|PubMed:23086957}; Single-pass type II membrane protein {ECO:0000269|PubMed:23086957}. Membrane {ECO:0000305}; Lipid-anchor {ECO:0000305}. Note=Mitochondrial import is mediated by AA 1-40 and requires ATP.	Catalyzes the reduction of N-oxygenated molecules, acting as a counterpart of cytochrome P450 and flavin-containing monooxygenases in metabolic cycles (PubMed:19053771, PubMed:21029045, PubMed:30397129). As a component of prodrug-converting system, reduces a multitude of N-hydroxylated prodrugs particularly amidoximes, leading to increased drug bioavailability (PubMed:19053771). May be involved i…	TRANSMEM 21..40; /note="Helical; Signal-anchor for type II membrane protein"; /evidence="ECO:0000255"	2.48232e+06	3.05623e+06	2.48266e+06	3.23001e+06	5.711e+06	5.41606e+06	2.79491e+06	3.96863e+06	3.51907e+06	5.51514e+06	3.67864e+06	3.74316e+06	0.839868	1.23147	0.358313	0.897343	0.689603	1.21935	2	0	0	2	4	2	2	0	0	0	0	0
Unhealthy ribosome biogenesis protein 2 homolog OS=Homo sapiens OX=9606 GN=URB2 PE=1 SV=2	URB2	Q14146	170549	Nucleus, nucleolus {ECO:0000269|PubMed:15635413}.	0	0	1.53841e+06	3.64142e+06	4.18713e+06	255993	4.25255e+06	3.85732e+06	4.26336e+06	2.6367e+06	5.09589e+06	1.94368e+06	2.36791e+06	3.99145e+06	-0.163066	0.0780464	0.356896	0.333569	-0.173941	0.127425	3	5	5	2	4	6	4	0	5	0	2	0
Trifunctional enzyme subunit alpha, mitochondrial OS=Homo sapiens OX=9606 GN=HADHA PE=1 SV=2	HADHA	P40939	83001.9	Mitochondrion {ECO:0000269|PubMed:29915090}. Mitochondrion inner membrane {ECO:0000269|PubMed:29915090}. Note=Protein stability and association with mitochondrion inner membrane do not require HADHB. {ECO:0000269|PubMed:29915090}.	Mitochondrial trifunctional enzyme catalyzes the last three of the four reactions of the mitochondrial beta-oxidation pathway (PubMed:8135828, PubMed:1550553, PubMed:29915090, PubMed:30850536). The mitochondrial beta-oxidation pathway is the major energy-producing process in tissues and is performed through four consecutive reactions breaking down fatty acids into acetyl-CoA (PubMed:29915090). Am…	0	5.51334e+07	5.41995e+07	5.77689e+07	4.49444e+07	6.90918e+07	6.62071e+07	7.87045e+07	7.45953e+07	6.06774e+07	7.99937e+07	3.84571e+07	4.41877e+07	0.109219	0.222335	0.356731	1.31638	-0.039058	0.0387388	18	19	22	18	22	22	22	19	19	17	18	15
decoy_sp|Q6L8G9|KRA56_HUMAN	#VALUE!	decoy_sp|Q6L8G9|KRA56_HUMAN	0	#N/A	#N/A	#N/A	271655	696849	721847	645207	756266	792757	761886	796359	604468	1.84398e+06	740718	735172	0.376392	0.477536	0.35552	0.426894	0.973804	0.615039	2	0	0	0	0	0	0	0	0	0	0	0
Golgi-specific brefeldin A-resistance guanine nucleotide exchange factor 1 OS=Homo sapiens OX=9606 GN=GBF1 PE=1 SV=2	GBF1	Q92538	206451	Golgi apparatus, cis-Golgi network {ECO:0000269|PubMed:12047556, ECO:0000269|PubMed:12808027, ECO:0000269|PubMed:15616190}. Endoplasmic reticulum-Golgi intermediate compartment {ECO:0000269|PubMed:12808027}. Golgi apparatus, trans-Golgi network {ECO:0000269|PubMed:23386609}. Golgi apparatus {ECO:0000269|PubMed:31519766}. Cytoplasm {ECO:0000269|PubMed:22573891, ECO:0000269|PubMed:31519766}. Lipid …	Guanine-nucleotide exchange factor (GEF) for members of the Arf family of small GTPases involved in trafficking in the early secretory pathway; its GEF activity initiates the coating of nascent vesicles via the localized generation of activated ARFs through replacement of GDP with GTP. Recruitment to cis-Golgi membranes requires membrane association of Arf-GDP and can be regulated by ARF1, ARF3, …	0	1.77859e+06	1.82476e+06	539031	1.33523e+06	1.33343e+06	1.31561e+06	1.52172e+06	2.31006e+06	1.46776e+06	2.25391e+06	1.38521e+06	2.22405e+06	-0.0561451	0.0426584	0.355407	0.314573	0.50122	0.491824	0	0	2	0	0	0	0	0	0	0	0	0
DNA topoisomerase 1 OS=Homo sapiens OX=9606 GN=TOP1 PE=1 SV=2	TOP1	P11387	90729.7	Nucleus, nucleolus {ECO:0000269|PubMed:12149243}. Nucleus, nucleoplasm {ECO:0000269|PubMed:12149243}. Note=Diffuse nuclear localization with some enrichment in nucleoli. On CPT treatment, cleared from nucleoli into nucleoplasm. Sumoylated forms found in both nucleoplasm and nucleoli.	Releases the supercoiling and torsional tension of DNA introduced during the DNA replication and transcription by transiently cleaving and rejoining one strand of the DNA duplex. Introduces a single-strand break via transesterification at a target site in duplex DNA. The scissile phosphodiester is attacked by the catalytic tyrosine of the enzyme, resulting in the formation of a DNA-(3'-phosphotyr…	0	2.88988e+06	7.21957e+06	3.13781e+06	6.69892e+06	7.30495e+06	6.66392e+06	5.3805e+06	5.8816e+06	5.68013e+06	2.61764e+06	7.36768e+06	5.31208e+06	0.641691	0.806096	0.354931	0.36445	0.207593	0.127516	2	5	3	4	5	4	0	0	4	2	5	3
Sentrin-specific protease 3 OS=Homo sapiens OX=9606 GN=SENP3 PE=1 SV=2	SENP3	Q9H4L4	65010.7	Nucleus, nucleolus {ECO:0000269|PubMed:19680224}. Nucleus, nucleoplasm {ECO:0000269|PubMed:19015314, ECO:0000269|PubMed:19680224}. Cytoplasm {ECO:0000250|UniProtKB:Q9EP97}. Note=Redistributes between the nucleolus and the nucleoplasm in response to mild oxidative stress (PubMed:19680224). Mainly found in the nucleoplasm, with low levels detected in the cytoplasmic and chromatin fractions (By simi…	Protease that releases SUMO2 and SUMO3 monomers from sumoylated substrates, but has only weak activity against SUMO1 conjugates. Deconjugates SUMO2 from MEF2D, which increases its transcriptional activation capability. Deconjugates SUMO2 and SUMO3 from CDCA8. Redox sensor that, when redistributed into nucleoplasm, can act as an effector to enhance HIF1A transcriptional activity by desumoylating E…	0	6.3695e+06	7.85314e+06	5.72335e+06	7.16817e+06	8.39961e+06	1.01187e+07	5.8754e+06	1.00124e+07	9.61534e+06	6.93809e+06	5.47848e+06	4.91559e+06	0.364912	0.83515	0.354575	0.562918	-0.202647	0.426728	3	4	4	3	4	5	3	4	4	2	3	3
Zinc finger CCCH-type antiviral protein 1-like OS=Homo sapiens OX=9606 GN=ZC3HAV1L PE=1 SV=2	ZC3HAV1L	Q96H79	32961.4	0	0	0	1.16071e+06	449179	1.32208e+06	1.07299e+06	1.06482e+06	2.14e+06	1.06969e+06	1.49585e+06	1.17775e+06	1.39294e+06	1.48937e+06	1.50931e+06	0.545004	0.429583	0.352441	0.382837	0.582882	0.834131	0	2	2	0	0	0	0	0	0	0	0	0
ATP-dependent zinc metalloprotease YME1L1 OS=Homo sapiens OX=9606 GN=YME1L1 PE=1 SV=2	YME1L1	Q96TA2	86458.5	Mitochondrion inner membrane {ECO:0000269|PubMed:10843804, ECO:0000269|PubMed:22262461}. Mitochondrion {ECO:0000269|PubMed:26923599, ECO:0000269|PubMed:27495975}.	ATP-dependent metalloprotease that catalyzes the degradation of folded and unfolded proteins with a suitable degron sequence in the mitochondrial intermembrane region (PubMed:26923599, PubMed:27786171). Plays an important role in regulating mitochondrial morphology and function by cleaving OPA1 at position S2, giving rise to a form of OPA1 that promotes maintenance of normal mitochondrial structu…	TRANSMEM 296..316; /note="Helical"; /evidence="ECO:0000255"	3.13012e+06	2.72893e+06	2.89715e+06	3.4898e+06	3.93549e+06	4.52162e+06	3.69454e+06	3.1649e+06	4.31184e+06	3.87766e+06	2.93778e+06	1.64683e+06	0.448262	1.53085	0.351418	1.07742	-0.0492593	0.0512575	2	0	0	0	3	3	0	0	3	0	0	2
RNA cytosine C(5)-methyltransferase NSUN2 OS=Homo sapiens OX=9606 GN=NSUN2 PE=1 SV=2	NSUN2	Q08J23	86472.8	Nucleus, nucleolus {ECO:0000269|PubMed:17071714, ECO:0000269|PubMed:17215513, ECO:0000269|PubMed:31276587}. Cytoplasm {ECO:0000269|PubMed:17071714, ECO:0000269|PubMed:31276587}. Mitochondrion {ECO:0000269|PubMed:31276587, ECO:0000269|PubMed:31287866}. Cytoplasm, cytoskeleton, spindle {ECO:0000269|PubMed:19596847}. Secreted, extracellular exosome {ECO:0000250|UniProtKB:Q1HFZ0}. Note=Concentrated i…	RNA cytosine C(5)-methyltransferase that methylates cytosine to 5-methylcytosine (m5C) in various RNAs, such as tRNAs, mRNAs and some long non-coding RNAs (lncRNAs) (PubMed:17071714, PubMed:22995836, PubMed:31358969, PubMed:31199786). Involved in various processes, such as epidermal stem cell differentiation, testis differentiation and maternal to zygotic transition during early development: acts…	0	8.14489e+06	1.43853e+07	9.43409e+06	1.02125e+07	1.539e+07	1.36903e+07	1.35517e+07	1.33213e+07	1.39005e+07	12697078	1.44686e+07	1.26246e+07	0.297802	0.428413	0.351169	0.70132	0.315955	0.583083	6	12	8	9	11	11	11	7	8	6	7	8
Cytoskeleton-associated protein 5 OS=Homo sapiens OX=9606 GN=CKAP5 PE=1 SV=3	CKAP5	Q14008	225502	Cytoplasm, cytoskeleton, microtubule organizing center, centrosome {ECO:0000269|PubMed:14654843, ECO:0000269|PubMed:21646404, ECO:0000269|PubMed:25596274, ECO:0000269|PubMed:9570755}. Cytoplasm, cytoskeleton, spindle pole {ECO:0000269|PubMed:21646404}. Cytoplasm, cytoskeleton, spindle {ECO:0000269|PubMed:21297582, ECO:0000269|PubMed:25596274, ECO:0000269|PubMed:9570755}. Chromosome, centromere, k…	Binds to the plus end of microtubules and regulates microtubule dynamics and microtubule organization. Acts as processive microtubule polymerase. Promotes cytoplasmic microtubule nucleation and elongation. Plays a major role in organizing spindle poles. In spindle formation protects kinetochore microtubules from depolymerization by KIF2C and has an essential role in centrosomal microtubule assemb…	0	1.02775e+07	7.62272e+06	9.19615e+06	3.93098e+06	1.03473e+07	6.61689e+06	1.23785e+07	1.47854e+07	7.37179e+06	2.85898e+06	3.65158e+06	7.54114e+06	-0.374928	0.440474	0.349991	0.462779	-0.947353	1.24538	8	6	11	3	8	7	7	9	9	2	3	5
Mitochondrial dicarboxylate carrier OS=Homo sapiens OX=9606 GN=SLC25A10 PE=1 SV=2	SLC25A10	Q9UBX3	31282.7	Mitochondrion inner membrane; Multi-pass membrane protein.	Involved in translocation of malonate, malate and succinate in exchange for phosphate, sulfate, sulfite or thiosulfate across mitochondrial inner membrane.	TRANSMEM 10..30; /note="Helical; Name=1"; /evidence="ECO:0000255"; TRANSMEM 63..82; /note="Helical; Name=2"; /evidence="ECO:0000255"; TRANSMEM 103..123; /note="Helical; Name=3"; /evidence="ECO:0000255"; TRANSMEM 163..182; /note="Helical; Name=4"; /evidence="ECO:0000255"; TRANSMEM 203..223; /note="Helical; Name=5"; /evidence="ECO:0000255"; TRANSMEM 255..275; /note="Helical; Name=6"; /evidence="ECO…	4.49419e+06	1.09635e+07	5.3721e+06	6.54609e+06	4.90647e+06	8.0757e+06	1.11474e+07	7.42546e+06	7.96757e+06	8.00295e+06	1.03698e+07	5.79523e+06	-0.093086	0.0681438	0.34954	0.336568	0.214449	0.174342	3	5	4	3	4	4	6	4	4	2	2	3
28S ribosomal protein S9, mitochondrial OS=Homo sapiens OX=9606 GN=MRPS9 PE=1 SV=2	MRPS9	P82933	45836	Mitochondrion {ECO:0000269|PubMed:25838379}.	0	0	797965	730704	2.33136e+06	1.37465e+06	1.68895e+06	2.97667e+06	904034	1.53315e+06	2.47449e+06	1.48517e+06	1.42147e+06	1.57549e+06	0.646002	0.434365	0.347607	0.193838	0.215573	0.147026	2	0	3	0	2	3	2	0	3	0	0	0
A-kinase anchor protein 1, mitochondrial OS=Homo sapiens OX=9606 GN=AKAP1 PE=1 SV=1	AKAP1	Q92667	97341.5	Mitochondrion outer membrane {ECO:0000250|UniProtKB:O08715}.	Binds to type I and II regulatory subunits of protein kinase A and anchors them to the cytoplasmic face of the mitochondrial outer membrane. Involved in mitochondrial-mediated antiviral innate immunity (PubMed:31522117). {ECO:0000269|PubMed:31522117}.	0	4.84119e+06	3.62089e+06	3.99649e+06	3.97564e+06	6.12167e+06	5.95622e+06	4.5066e+06	4.14228e+06	7.20323e+06	3.93941e+06	2.10033e+06	6.06163e+06	0.365753	0.702437	0.347537	0.476244	-0.0419677	0.0335117	7	5	6	6	8	8	6	6	8	4	4	7
Alcohol dehydrogenase class-3 OS=Homo sapiens OX=9606 GN=ADH5 PE=1 SV=4	ADH5	P11766	39723.8	Cytoplasm {ECO:0000305}.	Catalyzes the oxidation of long-chain primary alcohols and the oxidation of S-(hydroxymethyl) glutathione (PubMed:8460164). Also oxidizes long chain omega-hydroxy fatty acids, such as 20-HETE, producing both the intermediate aldehyde, 20-oxoarachidonate and the end product, a dicarboxylic acid, (5Z,8Z,11Z,14Z)-eicosatetraenedioate (PubMed:16081420). Class-III ADH is remarkably ineffective in oxid…	0	2.6298e+06	2.59036e+06	1.86902e+06	6.44803e+06	2.70148e+06	2.15534e+06	2.91929e+06	3.45002e+06	2.64743e+06	3.39127e+06	1.81169e+06	2.53458e+06	0.673251	0.439492	0.346987	0.87569	0.126254	0.155777	2	0	0	3	0	0	0	0	2	0	0	0
Casein kinase II subunit alpha' OS=Homo sapiens OX=9606 GN=CSNK2A2 PE=1 SV=1	CSNK2A2	P19784	41214.5	0	Catalytic subunit of a constitutively active serine/threonine-protein kinase complex that phosphorylates a large number of substrates containing acidic residues C-terminal to the phosphorylated serine or threonine. Regulates numerous cellular processes, such as cell cycle progression, apoptosis and transcription, as well as viral infection. May act as a regulatory node which integrates and coordi…	0	2.42948e+06	2.60642e+06	2.49343e+06	2.41133e+06	2.34001e+06	1.83715e+06	3.28118e+06	2.8553e+06	3.43768e+06	4.40554e+06	2.49148e+06	3.28911e+06	-0.192576	0.768273	0.346622	1.70188	0.436012	0.727311	0	0	0	0	3	0	0	0	0	0	0	0
Kinectin OS=Homo sapiens OX=9606 GN=KTN1 PE=1 SV=1	KTN1	Q86UP2	156276	Endoplasmic reticulum membrane; Single-pass type II membrane protein. Note=Vesicle membrane protein anchored to the endoplasmic reticulum.	Receptor for kinesin thus involved in kinesin-driven vesicle motility. Accumulates in integrin-based adhesion complexes (IAC) upon integrin aggregation by fibronectin.	TRANSMEM 7..29; /note="Helical; Signal-anchor for type II membrane protein"; /evidence="ECO:0000255"	5.69277e+06	9.42881e+06	6.77136e+06	8.87678e+06	1.46087e+07	9.54876e+06	6.90433e+06	3.93379e+06	1.69863e+07	1.29203e+06	5.35333e+06	9.30595e+06	0.593498	0.809462	0.345886	0.183713	-0.45679	0.315795	5	6	7	11	12	7	4	2	13	2	3	8
U4/U6.U5 small nuclear ribonucleoprotein 27 kDa protein OS=Homo sapiens OX=9606 GN=SNRNP27 PE=1 SV=1	SNRNP27	Q8WVK2	18861	Nucleus {ECO:0000305}.	May play a role in mRNA splicing.	0	1.32762e+07	1.03095e+07	1.34812e+07	5.40745e+06	8.5632e+06	8.02038e+06	2.09628e+07	1.51156e+07	1.1023e+07	2.88317e+07	2.10925e+07	1.93872e+07	-0.753218	1.6251	0.345634	0.473789	0.902962	1.5992	2	3	3	2	3	2	2	3	2	4	3	2
Cell division cycle and apoptosis regulator protein 1 OS=Homo sapiens OX=9606 GN=CCAR1 PE=1 SV=2	CCAR1	Q8IX12	132824	Cytoplasm, perinuclear region {ECO:0000269|PubMed:12816952}.	Associates with components of the Mediator and p160 coactivator complexes that play a role as intermediaries transducing regulatory signals from upstream transcriptional activator proteins to basal transcription machinery at the core promoter. Recruited to endogenous nuclear receptor target genes in response to the appropriate hormone. Also functions as a p53 coactivator. May thus play an importa…	0	1.87306e+06	2.81123e+06	3.32765e+06	3.81461e+06	3.47713e+06	3.11398e+06	2.68062e+06	4.73335e+06	2.75872e+06	4.52599e+06	2.7876e+06	7.59775e+06	0.377153	0.780554	0.344477	0.380609	0.896187	0.715398	2	0	0	0	0	0	0	0	3	0	0	5
Carbonic anhydrase 2 OS=Homo sapiens OX=9606 GN=CA2 PE=1 SV=2	CA2	P00918	29246.6	Cytoplasm {ECO:0000269|PubMed:15990874}. Cell membrane {ECO:0000269|PubMed:15990874}. Note=Colocalized with SLC26A6 at the surface of the cell membrane in order to form a bicarbonate transport metabolon. Displaced from the cytosolic surface of the cell membrane by PKC in phorbol myristate acetate (PMA)-induced cells.	Essential for bone resorption and osteoclast differentiation (By similarity). Reversible hydration of carbon dioxide. Can hydrate cyanamide to urea. Involved in the regulation of fluid secretion into the anterior chamber of the eye. Contributes to intracellular pH regulation in the duodenal upper villous epithelium during proton-coupled peptide absorption. Stimulates the chloride-bicarbonate exch…	0	3.02539e+06	2.9708e+06	3.15761e+06	2.95174e+06	3.91471e+06	3.22832e+06	3.90106e+06	5.05103e+06	2.66743e+06	4.13264e+06	4.25835e+06	4.0258e+06	0.141167	0.465209	0.344108	0.523291	0.43985	3.62544	0	0	0	2	0	0	0	0	0	0	0	0
U5 small nuclear ribonucleoprotein 40 kDa protein OS=Homo sapiens OX=9606 GN=SNRNP40 PE=1 SV=1	SNRNP40	Q96DI7	39311	Nucleus {ECO:0000269|PubMed:26912367, ECO:0000269|PubMed:28076346, ECO:0000269|PubMed:28502770, ECO:0000269|PubMed:28781166, ECO:0000269|PubMed:29301961, ECO:0000269|PubMed:29360106, ECO:0000269|PubMed:30315277, ECO:0000269|PubMed:30705154, ECO:0000269|PubMed:9731529}.	Required for pre-mRNA splicing as component of the activated spliceosome (PubMed:11991638, PubMed:28502770, PubMed:28781166, PubMed:28076346, PubMed:30315277, PubMed:29360106, PubMed:29301961, PubMed:30705154). Component of the U5 small nuclear ribonucleoprotein (snRNP) complex and the U4/U6-U5 tri-snRNP complex, building blocks of the spliceosome (PubMed:9774689, PubMed:16723661, PubMed:26912367…	0	2.62796e+06	2.50863e+06	2.81076e+06	8.78608e+06	3.93549e+06	3.60675e+06	2.86103e+06	3.41409e+06	3.80644e+06	3.33802e+06	4.0697e+06	3.54152e+06	1.03883	0.767006	0.343174	1.16174	0.462286	1.88311	0	0	0	4	4	0	0	0	2	0	0	0
Transmembrane emp24 domain-containing protein 10 OS=Homo sapiens OX=9606 GN=TMED10 PE=1 SV=2	TMED10	P49755	24977.5	Endoplasmic reticulum membrane {ECO:0000269|PubMed:10852829, ECO:0000269|PubMed:12237308, ECO:0000269|PubMed:9472029}; Single-pass type I membrane protein {ECO:0000255}. Endoplasmic reticulum-Golgi intermediate compartment membrane {ECO:0000269|PubMed:12237308, ECO:0000269|PubMed:32272059, ECO:0000269|PubMed:9382861}; Single-pass type I membrane protein {ECO:0000255}. Golgi apparatus membrane {EC…	Cargo receptor involved in protein vesicular trafficking and quality control in the endoplasmic reticulum (ER) and Golgi (PubMed:10052452, PubMed:11726511, PubMed:16641999, PubMed:17288597, PubMed:19296914, PubMed:20427317, PubMed:21219331, PubMed:27569046). The p24 protein family is a group of transmembrane proteins that bind coat protein complex I/COPI and coat protein complex II/COPII involved…	TRANSMEM 186..206; /note="Helical"; /evidence="ECO:0000255"	2.93601e+06	3.1025e+06	3.91908e+06	3.91712e+06	5.21084e+06	6.89219e+06	4.77461e+06	4.41136e+06	3.44505e+06	4.95716e+06	4.44814e+06	3.00052e+06	0.686018	1.03934	0.343101	0.826538	0.317147	0.546668	2	0	2	0	3	3	2	0	2	0	0	2
Carnitine O-palmitoyltransferase 2, mitochondrial OS=Homo sapiens OX=9606 GN=CPT2 PE=1 SV=2	CPT2	P23786	73779.2	Mitochondrion inner membrane; Peripheral membrane protein; Matrix side.	0	0	3.28844e+06	5.46391e+06	4.40896e+06	4.31261e+06	6.37094e+06	3.20977e+06	5.15855e+06	5.68673e+06	5.83819e+06	5.71838e+06	6.53025e+06	1.56744e+06	0.0780889	0.076711	0.342116	0.822863	0.0700442	0.0449071	3	4	4	3	6	2	3	4	5	2	3	2
General transcription factor 3C polypeptide 3 OS=Homo sapiens OX=9606 GN=GTF3C3 PE=1 SV=1	GTF3C3	Q9Y5Q9	101276	Nucleus.	Involved in RNA polymerase III-mediated transcription. Integral, tightly associated component of the DNA-binding TFIIIC2 subcomplex that directly binds tRNA and virus-associated RNA promoters.	0	6.99544e+06	6.9637e+06	8.47654e+06	7.12795e+06	1.11939e+07	9.42583e+06	6.61127e+06	1.28695e+07	8.94184e+06	4.41913e+06	2.6536e+06	8.91596e+06	0.30657	0.622881	0.341243	0.454365	-0.488744	0.484294	4	4	5	4	6	6	4	6	8	2	2	4
Squalene synthase OS=Homo sapiens OX=9606 GN=FDFT1 PE=1 SV=1	FDFT1	P37268	48116.4	Endoplasmic reticulum membrane {ECO:0000250|UniProtKB:Q02769}; Multi-pass membrane protein {ECO:0000255}.	Catalyzes the condensation of 2 farnesyl pyrophosphate (FPP) moieties to form squalene. Proceeds in two distinct steps. In the first half-reaction, two molecules of FPP react to form the stable presqualene diphosphate intermediate (PSQPP), with concomitant release of a proton and a molecule of inorganic diphosphate. In the second half-reaction, PSQPP undergoes heterolysis, isomerization, and redu…	TRANSMEM 284..304; /note="Helical"; /evidence="ECO:0000255"; TRANSMEM 384..404; /note="Helical"; /evidence="ECO:0000255"	1.99164e+06	2.44362e+06	1.18085e+06	1.391e+06	1.26552e+06	1.06926e+06	1.6113e+06	3.21859e+06	2.27925e+06	5.12903e+06	2.40016e+06	1.37937e+06	-0.592033	0.760512	0.340102	0.346952	0.665622	0.393099	0	0	0	0	2	0	0	2	2	2	0	0
Phospholipid hydroperoxide glutathione peroxidase OS=Homo sapiens OX=9606 GN=GPX4 PE=1 SV=3	GPX4	P36969	22175.3	[Isoform Mitochondrial]: Mitochondrion {ECO:0000250|UniProtKB:O70325}.; [Isoform Cytoplasmic]: Cytoplasm {ECO:0000269|PubMed:11115402}.	Essential antioxidant peroxidase that directly reduces phospholipid hydroperoxide even if they are incorporated in membranes and lipoproteins (By similarity). Can also reduce fatty acid hydroperoxide, cholesterol hydroperoxide and thymine hydroperoxide (By similarity). Plays a key role in protecting cells from oxidative damage by preventing membrane lipid peroxidation (By similarity). Required to…	0	5.73976e+06	5.36708e+06	6.20838e+06	5.84798e+06	5.47794e+06	6.36272e+06	7.87047e+06	7.52793e+06	6.51857e+06	5.167e+06	6.62395e+06	7.77606e+06	0.0307833	0.129244	0.340008	1.50003	0.176384	0.400605	0	0	0	0	3	0	0	2	0	0	0	0
Cellular tumor antigen p53 OS=Homo sapiens OX=9606 GN=TP53 PE=1 SV=4	TP53	P04637	43653.4	Cytoplasm {ECO:0000269|PubMed:15340061, ECO:0000269|PubMed:15701641, ECO:0000269|PubMed:17170702, ECO:0000269|PubMed:19011621, ECO:0000269|PubMed:22726440}. Nucleus {ECO:0000269|PubMed:15340061, ECO:0000269|PubMed:15701641, ECO:0000269|PubMed:17170702, ECO:0000269|PubMed:17591690, ECO:0000269|PubMed:18206965, ECO:0000269|PubMed:19011621}. Nucleus, PML body {ECO:0000269|PubMed:11025664, ECO:000026…	Acts as a tumor suppressor in many tumor types; induces growth arrest or apoptosis depending on the physiological circumstances and cell type. Involved in cell cycle regulation as a trans-activator that acts to negatively regulate cell division by controlling a set of genes required for this process. One of the activated genes is an inhibitor of cyclin-dependent kinases. Apoptosis induction seems…	0	1.29739e+06	1.72784e+06	1.83843e+06	2.82019e+06	1.97769e+06	2.7023e+06	1.94194e+06	2.87776e+06	1.33622e+06	1.81079e+06	1.13173e+06	1.37387e+06	0.624881	1.3236	0.339931	0.378532	-0.172219	0.284839	0	0	2	0	2	2	0	0	2	0	0	0
Very long-chain acyl-CoA synthetase OS=Homo sapiens OX=9606 GN=SLC27A2 PE=1 SV=2	SLC27A2	O14975	70314.4	Endoplasmic reticulum membrane {ECO:0000269|PubMed:11980911, ECO:0000269|PubMed:24269233}; Multi-pass membrane protein {ECO:0000255}. Peroxisome membrane {ECO:0000269|PubMed:10198260, ECO:0000269|PubMed:10640429}; Peripheral membrane protein {ECO:0000269|PubMed:10640429}. Cell membrane {ECO:0000250|UniProtKB:O35488}; Multi-pass membrane protein {ECO:0000255}. Microsome {ECO:0000269|PubMed:1064042…	Acyl CoA synthetase that activates long-chain and very long-chain fatty acids (VLCFAs) by catalyzing the formation of fatty acyl-CoA (PubMed:10198260, PubMed:10749848, PubMed:11980911). Can also activate branched-chain fatty acids such as phytanic acid and pristanic acid (PubMed:10198260). Does not activate C24 bile acids, cholate and chenodeoxycholate (PubMed:11980911). In vitro, activates 3-alp…	TRANSMEM 5..27; /note="Helical"; /evidence="ECO:0000255"; TRANSMEM 107..127; /note="Helical"; /evidence="ECO:0000255"; TRANSMEM 262..282; /note="Helical"; /evidence="ECO:0000255"	2.39486e+06	2.8504e+06	2.42091e+06	2.31398e+06	1.9961e+06	2.47386e+06	2.78353e+06	3.56699e+06	3.34499e+06	4.98985e+06	3.69599e+06	3.04259e+06	-0.176381	0.652701	0.338811	1.15264	0.613433	1.07716	0	0	0	0	2	0	0	0	0	0	0	0
A-kinase anchor protein 8-like OS=Homo sapiens OX=9606 GN=AKAP8L PE=1 SV=4	AKAP8L	Q9ULX6	71640.8	Nucleus {ECO:0000269|PubMed:10748171, ECO:0000269|PubMed:10761695}. Nucleus matrix {ECO:0000269|PubMed:11034899, ECO:0000269|PubMed:16391387}. Nucleus speckle {ECO:0000269|PubMed:17594903}. Nucleus, PML body {ECO:0000269|PubMed:11884601}. Cytoplasm {ECO:0000269|PubMed:10748171}. Note=Colocalizes with PRPF40A in the nuclear matrix (PubMed:16391387). Nuclear at steady state but shuttles between the…	Could play a role in constitutive transport element (CTE)-mediated gene expression by association with DHX9. Increases CTE-dependent nuclear unspliced mRNA export (PubMed:10748171, PubMed:11402034). Proposed to target PRKACA to the nucleus but does not seem to be implicated in the binding of regulatory subunit II of PKA (PubMed:10761695, PubMed:11884601). May be involved in nuclear envelope break…	0	7.77403e+06	3.98811e+06	5.49361e+06	7.45388e+06	3.88832e+06	5.33093e+06	6.8823e+06	5.4653e+06	9.45635e+06	5.96371e+06	1.17346e+07	1.03465e+07	-0.0495514	0.0438597	0.337513	0.399763	0.700658	0.808341	3	2	2	3	2	2	2	0	3	2	3	4
Proteasomal ubiquitin receptor ADRM1 OS=Homo sapiens OX=9606 GN=ADRM1 PE=1 SV=2	ADRM1	Q16186	42154.3	Cytoplasm {ECO:0000269|PubMed:16990800}. Nucleus {ECO:0000269|PubMed:16990800}.	Component of the 26S proteasome, a multiprotein complex involved in the ATP-dependent degradation of ubiquitinated proteins. This complex plays a key role in the maintenance of protein homeostasis by removing misfolded or damaged proteins, which could impair cellular functions, and by removing proteins whose functions are no longer required. Therefore, the proteasome participates in numerous cell…	0	1.00097e+06	1.26971e+06	836045	1.01689e+06	826390	1.02966e+06	1.45508e+06	1.55268e+06	915698	1.89283e+06	856736	1.35852e+06	-0.112867	0.212238	0.336733	0.507183	0.403073	0.441159	2	0	0	2	2	2	2	0	2	0	0	0
Cytochrome b-c1 complex subunit 2, mitochondrial OS=Homo sapiens OX=9606 GN=UQCRC2 PE=1 SV=3	UQCRC2	P22695	48443.4	Mitochondrion inner membrane {ECO:0000250|UniProtKB:P07257}; Peripheral membrane protein {ECO:0000250|UniProtKB:P07257}; Matrix side {ECO:0000250|UniProtKB:P07257}.	Component of the ubiquinol-cytochrome c oxidoreductase, a multisubunit transmembrane complex that is part of the mitochondrial electron transport chain which drives oxidative phosphorylation. The respiratory chain contains 3 multisubunit complexes succinate dehydrogenase (complex II, CII), ubiquinol-cytochrome c oxidoreductase (cytochrome b-c1 complex, complex III, CIII) and cytochrome c oxidase …	0	3.47954e+07	3.1731e+07	3.32272e+07	3.92037e+07	3.59907e+07	3.29452e+07	4.0495e+07	5.0719e+07	3.46057e+07	3.36458e+07	4.02897e+07	3.29823e+07	0.116455	0.625184	0.334918	0.842036	0.100062	0.405904	13	10	13	14	12	9	11	12	13	9	11	10
Serine/arginine repetitive matrix protein 2 OS=Homo sapiens OX=9606 GN=SRRM2 PE=1 SV=2	SRRM2	Q9UQ35	299622	Nucleus {ECO:0000269|PubMed:28076346, ECO:0000269|PubMed:28502770, ECO:0000269|PubMed:29301961, ECO:0000269|PubMed:29360106, ECO:0000269|PubMed:29361316, ECO:0000269|PubMed:30705154}. Nucleus speckle {ECO:0000269|PubMed:9531537}.	Required for pre-mRNA splicing as component of the spliceosome. {ECO:0000269|PubMed:19854871, ECO:0000269|PubMed:28076346, ECO:0000269|PubMed:28502770, ECO:0000269|PubMed:29301961, ECO:0000269|PubMed:29360106, ECO:0000269|PubMed:29361316, ECO:0000269|PubMed:30705154, ECO:0000269|PubMed:9531537}.	0	1.28032e+07	1.22374e+07	1.17765e+07	2.01101e+07	2.08222e+07	1.27776e+07	1.15266e+07	1.39159e+07	2.09265e+07	1.97572e+07	2.08654e+07	1.62968e+07	0.544815	1.02134	0.332786	0.488864	0.628543	2.05054	10	7	10	9	12	10	8	8	14	7	9	7
Plastin-3 OS=Homo sapiens OX=9606 GN=PLS3 PE=1 SV=4	PLS3	P13797	70813.9	Cytoplasm.	Actin-bundling protein found in intestinal microvilli, hair cell stereocilia, and fibroblast filopodia. May play a role in the regulation of bone development.	0	8.98788e+06	8.56571e+06	1.09401e+07	1.99458e+07	8.89112e+06	1.12037e+07	1.45075e+07	1.04206e+07	1.09318e+07	1.29395e+07	9.00533e+06	6.93419e+06	0.490824	0.486202	0.331733	0.763901	0.0193796	0.022491	8	6	7	11	7	5	6	7	5	3	5	4
Nuclear RNA export factor 1 OS=Homo sapiens OX=9606 GN=NXF1 PE=1 SV=1	NXF1	Q9UBU9	70185.1	Nucleus {ECO:0000269|PubMed:10924507, ECO:0000269|PubMed:18596238, ECO:0000269|PubMed:19864460, ECO:0000269|PubMed:23591820, ECO:0000269|PubMed:25662211}. Nucleus, nucleoplasm {ECO:0000269|PubMed:19324961, ECO:0000269|PubMed:23826332}. Nucleus speckle {ECO:0000269|PubMed:19324961, ECO:0000269|PubMed:23826332}. Nucleus, nuclear pore complex {ECO:0000269|PubMed:23591820}. Nucleus envelope {ECO:0000…	Involved in the nuclear export of mRNA species bearing retroviral constitutive transport elements (CTE) and in the export of mRNA from the nucleus to the cytoplasm (TAP/NFX1 pathway) (PubMed:10924507). The NXF1-NXT1 heterodimer is involved in the export of HSP70 mRNA in conjunction with ALYREF/THOC4 and THOC5 components of the TREX complex (PubMed:18364396, PubMed:19165146, PubMed:9660949). ALYRE…	0	1.32439e+06	1.36856e+06	1.63121e+06	1.59201e+06	1.10056e+06	2.59027e+06	2.02147e+06	1.67013e+06	1.74921e+06	1.70283e+06	2.05543e+06	1.95094e+06	0.288895	0.287693	0.331401	1.22152	0.400868	1.5059	0	0	0	0	0	0	0	0	0	0	0	0
Probable leucine--tRNA ligase, mitochondrial OS=Homo sapiens OX=9606 GN=LARS2 PE=1 SV=2	LARS2	Q15031	101977	Mitochondrion matrix {ECO:0000250}.	0	0	2.07701e+07	1.60781e+07	1.50416e+07	1.38611e+07	1.7447e+07	1.63213e+07	2.09274e+07	2.84277e+07	1.59152e+07	1.00024e+07	1.86843e+07	1.66545e+07	-0.123599	0.2776	0.330977	0.479417	-0.194627	0.277692	11	8	8	9	10	10	12	11	10	5	8	8
Multifunctional procollagen lysine hydroxylase and glycosyltransferase LH3 OS=Homo sapiens OX=9606 GN=PLOD3 PE=1 SV=1	PLOD3	O60568	84786.8	Rough endoplasmic reticulum {ECO:0000269|PubMed:10934207}. Endoplasmic reticulum lumen {ECO:0000269|PubMed:20470363}. Endoplasmic reticulum membrane {ECO:0000250|UniProtKB:Q9R0E1}; Peripheral membrane protein {ECO:0000250|UniProtKB:Q9R0E1}; Lumenal side {ECO:0000250|UniProtKB:Q9R0E1}. Secreted {ECO:0000269|PubMed:21465473}. Secreted, extracellular space {ECO:0000250|UniProtKB:Q9R0E1}. Note=The ma…	Multifunctional enzyme that catalyzes a series of essential post-translational modifications on Lys residues in procollagen (PubMed:11956192, PubMed:12475640, PubMed:18298658, PubMed:30089812, PubMed:18834968). Plays a redundant role in catalyzing the formation of hydroxylysine residues in -Xaa-Lys-Gly- sequences in collagens (PubMed:9582318, PubMed:9724729, PubMed:11956192, PubMed:12475640, PubM…	0	3.16739e+06	2.89335e+06	1.90775e+06	1.70819e+06	1.10233e+06	2.07552e+06	3.79816e+06	2.71116e+06	3.51071e+06	1.87283e+06	3.00311e+06	2.30826e+06	-0.70564	1.01253	0.330507	0.61117	-0.149482	0.199474	0	0	0	2	0	0	0	0	0	0	0	0
Integrator complex subunit 2 OS=Homo sapiens OX=9606 GN=INTS2 PE=1 SV=2	INTS2	Q9H0H0	134326	Nucleus membrane {ECO:0000269|PubMed:16239144}; Single-pass membrane protein {ECO:0000305}. Cytoplasm {ECO:0000269|PubMed:23904267}.	Component of the Integrator (INT) complex, a complex involved in the small nuclear RNAs (snRNA) U1 and U2 transcription and in their 3'-box-dependent processing. The Integrator complex is associated with the C-terminal domain (CTD) of RNA polymerase II largest subunit (POLR2A) and is recruited to the U1 and U2 snRNAs genes (Probable). Mediates recruitment of cytoplasmic dynein to the nuclear enve…	TRANSMEM 428..444; /note="Helical"; /evidence="ECO:0000255"	384498	337009	608311	642483	533551	362933	421541	532760	717316	822679	699665	1.53813e+06	0.210734	0.234802	0.330017	0.401531	1.20253	0.985319	3	0	0	0	0	2	0	0	0	0	0	0
La-related protein 7 OS=Homo sapiens OX=9606 GN=LARP7 PE=1 SV=1	LARP7	Q4G0J3	66900.6	Nucleus, nucleoplasm {ECO:0000269|PubMed:18483487}.	RNA-binding protein that specifically binds distinct small nuclear RNA (snRNAs) and regulates their processing and function (PubMed:18249148, PubMed:32017898). Specifically binds the 7SK snRNA (7SK RNA) and acts as a core component of the 7SK ribonucleoprotein (RNP) complex, thereby acting as a negative regulator of transcription elongation by RNA polymerase II (PubMed:18249148, PubMed:18483487).…	0	2.0111e+06	1.64401e+06	1.66266e+06	1.98744e+06	2.40273e+06	2.29522e+06	1.92911e+06	2.23536e+06	2.51898e+06	3.20093e+06	1.83928e+06	1.76135e+06	0.330188	1.24136	0.329768	1.02766	0.355041	0.439852	0	0	2	0	3	2	0	0	0	0	0	0
Poly(U)-binding-splicing factor PUF60 OS=Homo sapiens OX=9606 GN=PUF60 PE=1 SV=1	PUF60	Q9UHX1	59875.6	Nucleus {ECO:0000269|PubMed:10668799, ECO:0000269|PubMed:17579712}. Note=Colocalizes partially with TROVE2.	DNA- and RNA-binding protein, involved in several nuclear processes such as pre-mRNA splicing, apoptosis and transcription regulation. In association with FUBP1 regulates MYC transcription at the P2 promoter through the core-TFIIH basal transcription factor. Acts as a transcriptional repressor through the core-TFIIH basal transcription factor. Represses FUBP1-induced transcriptional activation bu…	0	5.61062e+06	5.13575e+06	3.53754e+06	5.34189e+06	1.16783e+07	4.1261e+06	7.14016e+06	6.08563e+06	4.72273e+06	1.0309e+07	8.05046e+06	4.61905e+06	0.566014	0.399327	0.329473	0.579336	0.685892	0.752772	0	0	0	0	0	0	0	0	0	0	0	2
Arginine--tRNA ligase, cytoplasmic OS=Homo sapiens OX=9606 GN=RARS1 PE=1 SV=2	RARS1	P54136	75382	Cytoplasm {ECO:0000269|PubMed:10791971, ECO:0000269|PubMed:16055448, ECO:0000269|PubMed:16430231}. Cytoplasm, cytosol {ECO:0000269|PubMed:19289464}.	Forms part of a macromolecular complex that catalyzes the attachment of specific amino acids to cognate tRNAs during protein synthesis (PubMed:25288775). Modulates the secretion of AIMP1 and may be involved in generation of the inflammatory cytokine EMAP2 from AIMP1 (PubMed:17443684). {ECO:0000269|PubMed:17443684, ECO:0000269|PubMed:25288775}.	0	5.23324e+07	4.22009e+07	5.00663e+07	5.88081e+07	5.72296e+07	5.19496e+07	5.17166e+07	6.68317e+07	6.30111e+07	2.87791e+07	4.01183e+07	4.50572e+07	0.216288	0.986519	0.328377	1.05666	-0.343604	0.828805	22	16	24	22	22	19	19	21	25	9	12	16
NF-kappa-B-activating protein OS=Homo sapiens OX=9606 GN=NKAP PE=1 SV=1	NKAP	Q8N5F7	47140.4	Nucleus {ECO:0000269|PubMed:14550261}.	Acts as a transcriptional repressor. Plays a role as a transcriptional corepressor of the Notch-mediated signaling required for T-cell development. Also involved in the TNF and IL-1 induced NF-kappa-B activation. Associates with chromatin at the Notch-regulated SKP2 promoter. {ECO:0000269|PubMed:14550261, ECO:0000269|PubMed:19409814}.	0	3.50421e+06	5.20809e+06	4.43149e+06	4.78968e+06	4.52993e+06	4.61274e+06	5.28567e+06	3.78089e+06	7.43088e+06	3.98361e+06	2.1857e+06	2.33676e+06	0.0840569	0.203538	0.32786	0.405928	-0.627816	0.955047	0	0	0	0	0	0	0	0	0	0	0	2
Hypoxia up-regulated protein 1 OS=Homo sapiens OX=9606 GN=HYOU1 PE=1 SV=1	HYOU1	Q9Y4L1	111337	Endoplasmic reticulum lumen.	Has a pivotal role in cytoprotective cellular mechanisms triggered by oxygen deprivation. May play a role as a molecular chaperone and participate in protein folding. {ECO:0000269|PubMed:10037731}.	0	1.67879e+07	1.3467e+07	7.61909e+06	1.23876e+07	1.47877e+07	1.42323e+07	1.70776e+07	1.77885e+07	1.2623e+07	1.4584e+07	1.49076e+07	7.39786e+06	0.128689	0.159127	0.326389	0.439247	-0.0380006	0.0304245	13	11	7	9	10	10	9	8	8	6	6	6
Proteasome subunit beta type-5 OS=Homo sapiens OX=9606 GN=PSMB5 PE=1 SV=3	PSMB5	P28074	28481	Cytoplasm {ECO:0000269|PubMed:12181345}. Nucleus {ECO:0000269|PubMed:12181345}.	Component of the 20S core proteasome complex involved in the proteolytic degradation of most intracellular proteins. This complex plays numerous essential roles within the cell by associating with different regulatory particles. Associated with two 19S regulatory particles, forms the 26S proteasome and thus participates in the ATP-dependent degradation of ubiquitinated proteins. The 26S proteasom…	0	2.14941e+06	2.48133e+06	1.72976e+06	2.16931e+06	2.17084e+06	2.24785e+06	2.68305e+06	1.86943e+06	3.41697e+06	2.83868e+06	2.57472e+06	3.13769e+06	0.0506996	0.126924	0.325338	0.466875	0.426967	1.26197	0	0	3	2	2	0	0	0	4	0	0	3
Acidic leucine-rich nuclear phosphoprotein 32 family member B OS=Homo sapiens OX=9606 GN=ANP32B PE=1 SV=1	ANP32B	Q92688	28788.7	[Isoform 1]: Nucleus. Note=Accumulates in the nuclei at the S phase. {ECO:0000250}.; [Isoform 2]: Cytoplasm. Note=Lacks a nuclear localization signal.	Multifunctional protein working as a cell cycle progression factor as well as a cell survival factor. Required for the progression from the G1 to the S phase. Anti-apoptotic protein which functions as a caspase-3 inhibitor. Has no phosphatase 2A (PP2A) inhibitor activity (By similarity). Exhibits histone chaperone properties, stimulating core histones to assemble into a nucleosome. {ECO:0000250, …	0	3.45293e+06	2.59677e+06	3134324	5.30416e+06	6.02168e+06	5.97708e+06	4.10051e+06	4.94719e+06	2.45023e+06	1.59733e+07	1.42233e+07	1.16164e+07	0.913817	2.86494	0.324176	0.425155	2.18676	2.96482	3	2	2	2	3	3	2	3	2	4	3	4
Protein phosphatase methylesterase 1 OS=Homo sapiens OX=9606 GN=PPME1 PE=1 SV=3	PPME1	Q9Y570	42315.8	0	Demethylates proteins that have been reversibly carboxymethylated. Demethylates PPP2CB (in vitro) and PPP2CA. Binding to PPP2CA displaces the manganese ion and inactivates the enzyme. {ECO:0000269|PubMed:10318862}.	0	2.42552e+06	3.19569e+06	2.27448e+06	2.56124e+06	3.08548e+06	2.94752e+06	3.10384e+06	3.41324e+06	3.36498e+06	3.74818e+06	2.12438e+06	2.49762e+06	0.122304	0.289049	0.323746	1.033	0.0841919	0.0999489	2	0	2	0	0	0	0	0	0	0	0	0
Transketolase OS=Homo sapiens OX=9606 GN=TKT PE=1 SV=3	TKT	P29401	67879.4	0	Catalyzes the transfer of a two-carbon ketol group from a ketose donor to an aldose acceptor, via a covalent intermediate with the cofactor thiamine pyrophosphate. {ECO:0000269|PubMed:27259054}.	0	1.13869e+07	1.19238e+07	1.57394e+07	1.6613e+07	1.24901e+07	1.29648e+07	1.3976e+07	1.41334e+07	2.07294e+07	1.21211e+07	1.25981e+07	2.09228e+07	0.107392	0.205635	0.322699	0.552963	0.225035	0.2788	4	4	9	12	9	8	0	0	11	0	4	11
Aspartate aminotransferase, mitochondrial OS=Homo sapiens OX=9606 GN=GOT2 PE=1 SV=3	GOT2	P00505	47518.6	Mitochondrion matrix {ECO:0000269|PubMed:9537447}. Cell membrane {ECO:0000269|PubMed:9537447}. Note=Exposure to alcohol promotes translocation to the cell membrane. {ECO:0000269|PubMed:9537447}.	Catalyzes the irreversible transamination of the L-tryptophan metabolite L-kynurenine to form kynurenic acid (KA). As a member of the malate-aspartate shuttle, it has a key role in the intracellular NAD(H) redox balance. Is important for metabolite exchange between mitochondria and cytosol, and for amino acid metabolism. Facilitates cellular uptake of long-chain free fatty acids. {ECO:0000269|Pub…	0	6.01258e+06	6.62326e+06	5.47707e+06	6.45265e+06	8.48178e+06	1.24936e+07	4.59379e+06	6.52808e+06	1.15185e+07	7.79578e+06	6.78765e+06	1.12326e+07	0.598631	0.794261	0.32188	0.292378	0.511247	0.861723	4	5	4	4	6	7	4	5	6	0	3	6
Microtubule-associated serine/threonine-protein kinase 4 OS=Homo sapiens OX=9606 GN=MAST4 PE=1 SV=4	MAST4	O15021	284102	Cytoplasm {ECO:0000305}.	0	0	3.88789e+06	4.18604e+06	5.7082e+06	5.07124e+06	3.56351e+06	5.50249e+06	5.64106e+06	7.46879e+06	4.11195e+06	4.67162e+06	4.88241e+06	2.81855e+06	0.036702	0.0498956	0.321437	0.4381	-0.155653	0.210616	0	0	0	0	0	0	0	0	2	0	0	0
Leucine-rich repeat-containing protein 59 OS=Homo sapiens OX=9606 GN=LRRC59 PE=1 SV=1	LRRC59	Q96AG4	34931.4	Microsome membrane {ECO:0000250}; Single-pass type II membrane protein {ECO:0000250}. Endoplasmic reticulum membrane; Single-pass type II membrane protein. Nucleus envelope. Note=Localization in the nuclear envelope depends upon the nuclear import machinery, including KPNB1.	Required for nuclear import of FGF1, but not that of FGF2. Might regulate nuclear import of exogenous FGF1 by facilitating interaction with the nuclear import machinery and by transporting cytosolic FGF1 to, and possibly through, the nuclear pores. {ECO:0000269|PubMed:22321063}.	TRANSMEM 245..265; /note="Helical"; /evidence="ECO:0000255"	9.06295e+06	1.85061e+07	8.86899e+06	1.0755e+07	1.24483e+07	1.75236e+07	1.07334e+07	2.16441e+07	1.30991e+07	1.08243e+07	2.15092e+07	1.25539e+07	0.160535	0.140167	0.319676	0.261477	0.300862	0.242026	3	4	3	4	4	6	3	5	5	2	5	5
La-related protein 1 OS=Homo sapiens OX=9606 GN=LARP1 PE=1 SV=2	LARP1	Q6PKG0	123513	Cytoplasm {ECO:0000269|PubMed:20430826, ECO:0000269|PubMed:24532714, ECO:0000269|PubMed:28650797}. Cytoplasmic granule {ECO:0000269|PubMed:24532714, ECO:0000269|PubMed:25940091}. Note=Colocalizes with RPTOR and PABPC1 in cytoplasmic granules that resemble stress granules. {ECO:0000269|PubMed:24532714, ECO:0000269|PubMed:25940091}.	RNA-binding protein that regulates the translation of specific target mRNA species downstream of the mTORC1 complex, in function of growth signals and nutrient availability (PubMed:20430826, PubMed:23711370, PubMed:24532714, PubMed:25940091, PubMed:28650797, PubMed:28673543, PubMed:29244122). Interacts on the one hand with the 3' poly-A tails that are present in all mRNA molecules, and on the oth…	0	6.24221e+06	3.08986e+06	5.48599e+06	4.40596e+06	6.55933e+06	6.15105e+06	5.59401e+06	6.22698e+06	6.63888e+06	5.12693e+06	4.25697e+06	5.37839e+06	0.208017	0.264307	0.317035	0.536802	-0.00544078	0.00604291	5	2	4	3	3	4	4	3	4	0	2	3
Retinoblastoma-associated protein OS=Homo sapiens OX=9606 GN=RB1 PE=1 SV=2	RB1	P06400	106165	Nucleus {ECO:0000269|PubMed:20940255}. Note=During keratinocyte differentiation, acetylation by KAT2B/PCAF is required for nuclear localization. {ECO:0000269|PubMed:20940255}.	Key regulator of entry into cell division that acts as a tumor suppressor. Promotes G0-G1 transition when phosphorylated by CDK3/cyclin-C. Acts as a transcription repressor of E2F1 target genes. The underphosphorylated, active form of RB1 interacts with E2F1 and represses its transcription activity, leading to cell cycle arrest. Directly involved in heterochromatin formation by maintaining overal…	0	1.9113e+06	2.03244e+06	1.79396e+06	2.26548e+06	2.48367e+06	1.22151e+06	2.45932e+06	3.4113e+06	1.27439e+06	2.56074e+06	1.76286e+06	2.5281e+06	0.0574161	0.0685799	0.316463	0.307462	0.255988	0.61889	0	0	0	0	0	2	0	0	0	0	0	0
Probable ATP-dependent RNA helicase DDX17 OS=Homo sapiens OX=9606 GN=DDX17 PE=1 SV=2	DDX17	Q92841	80274	Nucleus {ECO:0000269|PubMed:12138182, ECO:0000269|PubMed:12595555, ECO:0000269|PubMed:17226766, ECO:0000269|PubMed:17699760, ECO:0000269|PubMed:19995069, ECO:0000269|PubMed:22002106, ECO:0000269|PubMed:24581491, ECO:0000269|PubMed:25126784}. Nucleus, nucleolus {ECO:0000269|PubMed:17226766, ECO:0000269|PubMed:22002106}. Cytoplasm, cytosol {ECO:0000269|PubMed:25126784}. Note=In the course of bunyav…	As an RNA helicase, unwinds RNA and alters RNA structures through ATP binding and hydrolysis. Involved in multiple cellular processes, including pre-mRNA splicing, alternative splicing, ribosomal RNA processing and miRNA processing, as well as transcription regulation. Regulates the alternative splicing of exons exhibiting specific features (PubMed:12138182, PubMed:23022728, PubMed:24910439, PubM…	0	4.16679e+07	3.87909e+07	5.04138e+07	6.17952e+07	5.30995e+07	5.53284e+07	4.86522e+07	6.16699e+07	5.24576e+07	1.08798e+08	6.33026e+07	9.8686e+07	0.379264	1.40202	0.314758	0.955513	1.04899	1.51482	15	11	19	17	18	17	13	13	16	15	15	20
NAD(P) transhydrogenase, mitochondrial OS=Homo sapiens OX=9606 GN=NNT PE=1 SV=3	NNT	Q13423	113899	Mitochondrion inner membrane {ECO:0000305}; Multi-pass membrane protein {ECO:0000305}; Matrix side {ECO:0000305}.	The transhydrogenation between NADH and NADP is coupled to respiration and ATP hydrolysis and functions as a proton pump across the membrane (By similarity). May play a role in reactive oxygen species (ROS) detoxification in the adrenal gland (PubMed:22634753). {ECO:0000250|UniProtKB:P07001, ECO:0000269|PubMed:22634753}.	TRANSMEM 475..493; /note="Helical"; /evidence="ECO:0000255"; TRANSMEM 501..521; /note="Helical"; /evidence="ECO:0000255"; TRANSMEM 527..546; /note="Helical"; /evidence="ECO:0000255"; TRANSMEM 558..578; /note="Helical"; /evidence="ECO:0000255"; TRANSMEM 596..616; /note="Helical"; /evidence="ECO:0000255"; TRANSMEM 622..642; /note="Helical"; /evidence="ECO:0000255"; TRANSMEM 646..666; /note="Helical…	2.05983e+07	3.16395e+07	16904472	1.95368e+07	3.30483e+07	2.89564e+07	2.67178e+07	2.70702e+07	3.21308e+07	1.81407e+07	2.06117e+07	2.01831e+07	0.237966	0.278534	0.313406	0.515472	-0.230431	0.308974	11	13	10	11	15	14	10	9	15	4	6	9
Replication factor C subunit 5 OS=Homo sapiens OX=9606 GN=RFC5 PE=1 SV=1	RFC5	P40937	38498.4	Nucleus {ECO:0000305}.	The elongation of primed DNA templates by DNA polymerase delta and epsilon requires the action of the accessory proteins proliferating cell nuclear antigen (PCNA) and activator 1. {ECO:0000269|PubMed:8999859}.	0	2.37764e+06	3.20401e+06	4.86902e+06	4.05197e+06	4.43984e+06	3.86924e+06	5.68737e+06	4.93167e+06	2.36544e+06	2.97575e+06	4.1201e+06	2.37147e+06	0.242205	0.351989	0.313193	0.27212	-0.142566	0.135176	3	3	5	4	4	4	4	4	3	2	0	2
Glyoxalase domain-containing protein 4 OS=Homo sapiens OX=9606 GN=GLOD4 PE=1 SV=1	GLOD4	Q9HC38	34794.1	Mitochondrion {ECO:0000305|PubMed:12897971}.	0	0	2.0033e+06	1.45057e+06	1.69192e+06	1.67019e+06	1.78842e+06	1.60135e+06	2.30451e+06	2.45691e+06	1.6213e+06	2.24345e+06	1.84706e+06	4.12969e+06	-0.024267	0.0585771	0.310779	0.611219	0.675781	0.640439	0	0	0	0	2	0	0	0	0	0	0	0
Thioredoxin-dependent peroxide reductase, mitochondrial OS=Homo sapiens OX=9606 GN=PRDX3 PE=1 SV=3	PRDX3	P30048	27692.7	Mitochondrion {ECO:0000250|UniProtKB:P35705}. Cytoplasm {ECO:0000305|PubMed:12492477}. Early endosome {ECO:0000269|PubMed:15750338}. Note=Localizes to early endosomes in a RPS6KC1-dependent manner. {ECO:0000269|PubMed:15750338}.	Thiol-specific peroxidase that catalyzes the reduction of hydrogen peroxide and organic hydroperoxides to water and alcohols, respectively. Plays a role in cell protection against oxidative stress by detoxifying peroxides (PubMed:7733872, PubMed:17707404). Acts synergistically with MAP3K13 to regulate the activation of NF-kappa-B in the cytosol (PubMed:12492477). {ECO:0000269|PubMed:12492477, ECO…	0	1.21226e+07	1.42314e+07	7.27379e+06	1.43574e+07	1.37761e+07	1.64498e+07	2.10415e+07	1.25308e+07	8.11809e+06	2.76472e+07	6.50516e+06	2.37331e+06	0.406851	0.758455	0.310061	0.246249	0.119258	0.0405984	3	3	3	3	3	3	4	3	3	3	2	2
V-type proton ATPase 116 kDa subunit a1 OS=Homo sapiens OX=9606 GN=ATP6V0A1 PE=1 SV=3	ATP6V0A1	Q93050	96416.6	Cytoplasmic vesicle membrane; Multi-pass membrane protein. Melanosome. Note=Coated vesicle. Identified by mass spectrometry in melanosome fractions from stage I to stage IV.	Required for assembly and activity of the vacuolar ATPase. Potential role in differential targeting and regulation of the enzyme for a specific organelle (By similarity). {ECO:0000250}.	TRANSMEM 389..407; /note="Helical"; /evidence="ECO:0000255"; TRANSMEM 410..426; /note="Helical"; /evidence="ECO:0000255"; TRANSMEM 442..471; /note="Helical"; /evidence="ECO:0000255"; TRANSMEM 535..554; /note="Helical"; /evidence="ECO:0000255"; TRANSMEM 573..593; /note="Helical"; /evidence="ECO:0000255"; TRANSMEM 639..658; /note="Helical"; /evidence="ECO:0000255"; TRANSMEM 725..749; /note="Helical…	3.08749e+06	2.85799e+06	1.50198e+06	4.14293e+06	2.86504e+06	2.65301e+06	2.88191e+06	3.39957e+06	2.94782e+06	3.64852e+06	2.54773e+06	2.63912e+06	0.375419	0.470566	0.309472	0.497949	0.246541	0.310871	3	2	2	3	3	0	0	0	3	0	0	2
Pachytene checkpoint protein 2 homolog OS=Homo sapiens OX=9606 GN=TRIP13 PE=1 SV=2	TRIP13	Q15645	48552.1	0	Plays a key role in chromosome recombination and chromosome structure development during meiosis. Required at early steps in meiotic recombination that leads to non-crossovers pathways. Also needed for efficient completion of homologous synapsis by influencing crossover distribution along the chromosomes affecting both crossovers and non-crossovers pathways. Also required for development of highe…	0	1.48202e+06	2.02524e+06	5.68925e+06	5.11061e+06	3.48272e+06	1.92372e+06	3.57378e+06	3.46826e+06	4.34485e+06	2.33802e+06	3.41427e+06	866517	0.193572	0.0979542	0.308214	0.209517	-0.474517	0.221421	2	2	4	4	3	2	3	3	3	2	0	2
E3 ubiquitin-protein ligase RNF19A OS=Homo sapiens OX=9606 GN=RNF19A PE=1 SV=3	RNF19A	Q9NV58	90697.1	Membrane {ECO:0000305}; Multi-pass membrane protein {ECO:0000305}. Cytoplasm, cytoskeleton, microtubule organizing center, centrosome {ECO:0000269|PubMed:11237715, ECO:0000269|PubMed:12145308, ECO:0000269|PubMed:12750386, ECO:0000269|PubMed:15456787}. Note=Present in the hyaline inclusion bodies specifically found in motor neurons from amyotrophic lateral sclerosis patients. Present in the Lewy b…	E3 ubiquitin-protein ligase which accepts ubiquitin from E2 ubiquitin-conjugating enzymes UBE2L3 and UBE2L6 in the form of a thioester and then directly transfers the ubiquitin to targeted substrates, such as SNCAIP or CASR. Specifically ubiquitinates pathogenic SOD1 variants, which leads to their proteasomal degradation and to neuronal protection. {ECO:0000269|PubMed:11237715, ECO:0000269|PubMed…	TRANSMEM 368..388; /note="Helical"; /evidence="ECO:0000255"; TRANSMEM 424..444; /note="Helical"; /evidence="ECO:0000255"	4.74121e+06	5.59869e+06	6.52749e+06	6.71937e+06	2.13536e+07	6.88571e+06	5.33247e+06	7.17034e+06	8.3678e+06	2.4146e+06	5.55662e+06	4.428e+06	1.05141	0.546694	0.307236	0.581981	-0.443988	0.63746	0	0	0	0	0	0	0	0	0	2	0	0
Serpin H1 OS=Homo sapiens OX=9606 GN=SERPINH1 PE=1 SV=2	SERPINH1	P50454	46442	Endoplasmic reticulum lumen.	Binds specifically to collagen. Could be involved as a chaperone in the biosynthetic pathway of collagen.	0	1.30677e+07	1.43028e+07	1.50945e+07	1.49666e+07	1.4319e+07	1.64833e+07	1.91467e+07	1.93986e+07	1.39646e+07	2.01984e+07	1.68629e+07	8.85702e+06	0.108094	0.56086	0.306318	0.83188	0.112796	0.123141	9	9	10	9	11	11	8	10	9	9	8	6
Nucleolysin TIAR OS=Homo sapiens OX=9606 GN=TIAL1 PE=1 SV=1	TIAL1	Q01085	41589.9	Cytoplasm {ECO:0000250}. Nucleus {ECO:0000250}. Cytoplasmic granule. Note=The cytoplasmic granules are stress granules which are a dense aggregation in the cytosol composed of proteins and RNAs that appear when the cell is under stress. Colocalizes with NANOS3 in the stress granules (By similarity). Cytoplasmic granules of cytolytic T-lymphocytes. {ECO:0000250}.	RNA-binding protein. Possesses nucleolytic activity against cytotoxic lymphocyte target cells. May be involved in apoptosis.	0	2.76907e+06	3.24883e+06	2.3565e+06	2.71538e+06	6.58004e+06	2.46751e+06	3.44798e+06	3.63116e+06	3.27616e+06	4.29076e+06	1.64147e+06	1.23755e+06	0.49019	0.345088	0.306311	1.11914	-0.224057	0.151038	0	0	0	0	0	0	0	0	0	0	0	2
Splicing factor U2AF 35 kDa subunit-like protein OS=Homo sapiens OX=9606 GN=U2AF1L5 PE=1 SV=1	U2AF1L5	P0DN76,Q01081	27872.2	#N/A	#N/A	#N/A	1.26055e+07	1.13659e+07	8.46203e+06	2.04353e+07	8.44583e+06	1.13685e+07	1.60391e+07	1.1194e+07	1.28499e+07	1.21978e+07	3.76153e+06	9.31856e+06	0.311492	0.274172	0.305507	0.608681	-0.359608	0.359739	6	5	7	8	5	7	5	5	5	3	2	5
Peptidyl-prolyl cis-trans isomerase F, mitochondrial OS=Homo sapiens OX=9606 GN=PPIF PE=1 SV=1	PPIF	P30405	22040.4	Mitochondrion matrix {ECO:0000269|PubMed:10406942}.	PPIase that catalyzes the cis-trans isomerization of proline imidic peptide bonds in oligopeptides and may therefore assist protein folding (PubMed:20676357). Involved in regulation of the mitochondrial permeability transition pore (mPTP). It is proposed that its association with the mPTP is masking a binding site for inhibiting inorganic phosphate (Pi) and promotes the open probability of the mP…	0	4.05067e+06	4.14727e+06	4.373e+06	3.82614e+06	6.61677e+06	3.73837e+06	5.66721e+06	4.71192e+06	5.1212e+06	3.51789e+06	3.9164e+06	5.0647e+06	0.173896	0.220237	0.302208	1.53837	-0.00827975	0.016811	0	0	0	0	3	0	0	0	0	0	0	0
TP53-binding protein 1 OS=Homo sapiens OX=9606 GN=TP53BP1 PE=1 SV=2	TP53BP1	Q12888	213572	Nucleus {ECO:0000269|PubMed:11331310, ECO:0000269|PubMed:15525939, ECO:0000269|PubMed:16294045, ECO:0000269|PubMed:16294047, ECO:0000269|PubMed:17190600, ECO:0000269|PubMed:19176521, ECO:0000269|PubMed:21144835, ECO:0000269|PubMed:28241136, ECO:0000269|PubMed:9748285}. Chromosome {ECO:0000269|PubMed:12824158, ECO:0000269|PubMed:15525939, ECO:0000269|PubMed:17190600, ECO:0000269|PubMed:23333306, E…	Double-strand break (DSB) repair protein involved in response to DNA damage, telomere dynamics and class-switch recombination (CSR) during antibody genesis (PubMed:12364621, PubMed:22553214, PubMed:23333306, PubMed:17190600, PubMed:21144835, PubMed:28241136). Plays a key role in the repair of double-strand DNA breaks (DSBs) in response to DNA damage by promoting non-homologous end joining (NHEJ)-…	0	3.56512e+06	2.6798e+06	1.9738e+06	3.68625e+06	5.57228e+06	3.54942e+06	1.5529e+06	1.92539e+06	6.64911e+06	3.08853e+06	7.21354e+06	8.32229e+06	0.640055	0.892926	0.301278	0.138018	1.18021	0.980802	4	0	3	4	7	3	3	2	6	4	6	7
Ataxin-2-like protein OS=Homo sapiens OX=9606 GN=ATXN2L PE=1 SV=2	ATXN2L	Q8WWM7	113372	Membrane {ECO:0000269|PubMed:11784712}; Peripheral membrane protein {ECO:0000269|PubMed:11784712}. Cytoplasm {ECO:0000269|PubMed:23209657}. Nucleus speckle {ECO:0000269|PubMed:23209657}. Cytoplasmic granule {ECO:0000269|PubMed:23209657}. Note=Predominantly cytoplasmic but is also detected in nuclear speckles (PubMed:23209657). Component of cytoplasmic stress granules (PubMed:23209657). Inhibition…	Involved in the regulation of stress granule and P-body formation. {ECO:0000269|PubMed:23209657}.	0	1.93139e+06	2.23535e+06	1.75155e+06	4.168e+06	3.1865e+06	4.31161e+06	2.97848e+06	2.5091e+06	1.80071e+06	3.38773e+06	2.72314e+06	885624	0.979071	2.13555	0.300401	0.545166	0.24145	0.179443	0	2	0	3	4	4	0	0	3	4	0	2
Long-chain fatty acid transport protein 4 OS=Homo sapiens OX=9606 GN=SLC27A4 PE=1 SV=1	SLC27A4	Q6P1M0	72066.4	Endoplasmic reticulum membrane {ECO:0000305|PubMed:24269233}; Multi-pass membrane protein {ECO:0000255}.	Involved in translocation of long-chain fatty acids (LFCA) across the plasma membrane (PubMed:12556534, PubMed:21395585). Has acyl-CoA ligase activity for long-chain and very-long-chain fatty acids (VLCFAs) (PubMed:24269233). Appears to be the principal fatty acid transporter in small intestinal enterocytes. Plays a role in the formation of the epidermal barrier. Required for fat absorption in ea…	TRANSMEM 20..42; /note="Helical"; /evidence="ECO:0000255"; TRANSMEM 139..156; /note="Helical"; /evidence="ECO:0000255"	1.69024e+06	1.98721e+06	1.64184e+06	986604	1.19068e+06	1.77725e+06	2.02312e+06	1.95734e+06	2.55741e+06	1.92091e+06	1.66892e+06	1.87252e+06	-0.427727	0.808067	0.297586	0.864511	0.0382879	0.132209	0	0	2	0	0	0	0	0	0	0	0	0
Serine/threonine-protein phosphatase PP1-beta catalytic subunit OS=Homo sapiens OX=9606 GN=PPP1CB PE=1 SV=3	PPP1CB	P62140	37188.3	Cytoplasm {ECO:0000269|PubMed:11739654}. Nucleus {ECO:0000269|PubMed:11739654}. Nucleus, nucleoplasm {ECO:0000269|PubMed:11739654}. Nucleus, nucleolus {ECO:0000269|PubMed:11739654, ECO:0000269|PubMed:20926688}. Note=Highly mobile in cells and can be relocalized through interaction with targeting subunits. In the presence of PPP1R8 relocalizes from the nucleus to nuclear speckles. {ECO:0000269|Pub…	Protein phosphatase that associates with over 200 regulatory proteins to form highly specific holoenzymes which dephosphorylate hundreds of biological targets. Protein phosphatase (PP1) is essential for cell division, it participates in the regulation of glycogen metabolism, muscle contractility and protein synthesis. Involved in regulation of ionic conductances and long-term synaptic plasticity.…	0	1.10502e+07	1.15009e+07	8.92569e+06	1.31902e+07	7.08864e+06	1.23027e+07	1.30474e+07	1.5653e+07	9.95461e+06	1.53964e+07	1.51001e+07	1.01838e+07	0.0497683	0.062005	0.296367	0.583735	0.370045	0.755038	0	0	0	8	0	6	0	0	0	5	0	0
Cleft lip and palate transmembrane protein 1-like protein OS=Homo sapiens OX=9606 GN=CLPTM1L PE=1 SV=1	CLPTM1L	Q96KA5	62230.4	Membrane {ECO:0000305}; Multi-pass membrane protein {ECO:0000305}.	Enhances cisplatin-mediated apoptosis, when overexpressed. {ECO:0000269|PubMed:11162647}.	TRANSMEM 11..31; /note="Helical"; /evidence="ECO:0000255"; TRANSMEM 285..305; /note="Helical"; /evidence="ECO:0000255"; TRANSMEM 325..342; /note="Helical"; /evidence="ECO:0000255"; TRANSMEM 347..364; /note="Helical"; /evidence="ECO:0000255"; TRANSMEM 403..423; /note="Helical"; /evidence="ECO:0000255"; TRANSMEM 429..449; /note="Helical"; /evidence="ECO:0000255"	2.84582e+06	3.44383e+06	1.77431e+06	2.43739e+06	2.75434e+06	2.94584e+06	3.46997e+06	3.74886e+06	2.68359e+06	7.51041e+06	3.94156e+06	3.28213e+06	0.0131099	0.0159412	0.296295	0.452586	0.869599	0.726384	0	0	2	0	2	0	0	0	2	0	0	0
G-rich sequence factor 1 OS=Homo sapiens OX=9606 GN=GRSF1 PE=1 SV=3	GRSF1	Q12849	53127	[Isoform 1]: Mitochondrion matrix {ECO:0000269|PubMed:23473033, ECO:0000269|PubMed:23473034, ECO:0000269|PubMed:25683715, ECO:0000269|PubMed:29967381}. Note=Localizes to mitochondrial RNA granules found in close proximity to the mitochondrial nucleoids. {ECO:0000269|PubMed:23473033, ECO:0000269|PubMed:23473034, ECO:0000269|PubMed:25683715}.; [Isoform 2]: Cytoplasm {ECO:0000269|PubMed:23473034}.	Regulator of post-transcriptional mitochondrial gene expression, required for assembly of the mitochondrial ribosome and for recruitment of mRNA and lncRNA. Binds RNAs containing the 14 base G-rich element. Preferentially binds RNAs transcribed from three contiguous genes on the light strand of mtDNA, the ND6 mRNA, and the long non-coding RNAs for MT-CYB and MT-ND5, each of which contains multipl…	0	2.0972e+06	2.63371e+06	2.96291e+06	2.59264e+06	3.56804e+06	6.92851e+06	3.82438e+06	3.15373e+06	2.46845e+06	2.58461e+06	2.353e+06	2.43416e+06	0.766605	0.602299	0.296091	0.55606	-0.0616878	0.153536	2	2	0	0	2	3	0	0	2	2	2	0
Ubiquitin-40S ribosomal protein S27a OS=Homo sapiens OX=9606 GN=RPS27A PE=1 SV=2	RPS27A	P62979	17965.6	[Ubiquitin]: Cytoplasm {ECO:0000250}. Nucleus {ECO:0000250}.	[Ubiquitin]: Exists either covalently attached to another protein, or free (unanchored). When covalently bound, it is conjugated to target proteins via an isopeptide bond either as a monomer (monoubiquitin), a polymer linked via different Lys residues of the ubiquitin (polyubiquitin chains) or a linear polymer linked via the initiator Met of the ubiquitin (linear polyubiquitin chains). Polyubiqui…	0	2.88054e+06	2.24494e+06	1.80442e+06	1.8413e+06	2.29439e+06	2.27907e+06	2.93897e+06	2.26193e+06	3.29622e+06	3.44369e+06	3.62674e+06	2.87121e+06	-0.111437	0.190027	0.29414	0.528151	0.520649	1.22049	2	0	0	0	0	0	0	0	0	0	0	0
Putative transferase CAF17, mitochondrial OS=Homo sapiens OX=9606 GN=IBA57 PE=1 SV=1	IBA57	Q5T440	38155.5	Mitochondrion {ECO:0000269|PubMed:22323289, ECO:0000269|PubMed:23462291}.	Involved in the maturation of mitochondrial 4Fe-4S proteins functioning late in the iron-sulfur cluster assembly pathway. {ECO:0000269|PubMed:23462291}.	0	3.30087e+06	3.05532e+06	4.19674e+06	5.82493e+06	4.45275e+06	5.82928e+06	3.42637e+06	3.79619e+06	5.70682e+06	4.48097e+06	4.8586e+06	3.87605e+06	0.610041	1.49182	0.29301	0.430402	0.3246	0.922098	0	0	0	4	2	4	0	2	4	0	0	0
Lamina-associated polypeptide 2, isoform alpha OS=Homo sapiens OX=9606 GN=TMPO PE=1 SV=2	TMPO	P42166	75493.8	Nucleus. Chromosome. Note=Expressed diffusely throughout the nucleus.	May be involved in the structural organization of the nucleus and in the post-mitotic nuclear assembly. Plays an important role, together with LMNA, in the nuclear anchorage of RB1.; TP and TP5 may play a role in T-cell development and function. TP5 is an immunomodulating pentapeptide.	0	1.26578e+07	1.82361e+07	7.81133e+06	1.1063e+07	1.30931e+07	1.45481e+07	1.43727e+07	1.58526e+07	1.71922e+07	2.66288e+07	9.01181e+06	1.90392e+07	-3.72578e-05	3.41624e-05	0.292894	0.392933	0.498481	0.377188	0	9	8	9	9	8	0	0	0	8	0	9
Nuclear inhibitor of protein phosphatase 1 OS=Homo sapiens OX=9606 GN=PPP1R8 PE=1 SV=2	PPP1R8	Q12972	38479.8	Nucleus. Nucleus speckle. Note=Primarily, but not exclusively, nuclear.; [Isoform Gamma]: Cytoplasm. Note=Found mainly in the cytoplasm.	Inhibitor subunit of the major nuclear protein phosphatase-1 (PP-1). It has RNA-binding activity but does not cleave RNA and may target PP-1 to RNA-associated substrates. May also be involved in pre-mRNA splicing. Binds DNA and might act as a transcriptional repressor. Seems to be required for cell proliferation.; Isoform Gamma is a site-specific single-strand endoribonuclease that cleaves single…	0	3.81296e+06	4.21925e+06	4.71913e+06	3.77958e+06	3.18783e+06	4.95891e+06	6.27007e+06	4.83807e+06	4.51186e+06	3.04365e+06	5.63394e+06	2.57214e+06	-0.0964992	0.179397	0.292745	0.729676	-0.18076	0.194626	0	0	0	0	0	0	0	0	0	0	0	2
MICOS complex subunit MIC60 OS=Homo sapiens OX=9606 GN=IMMT PE=1 SV=1	IMMT	Q16891	83679	Mitochondrion inner membrane {ECO:0000269|PubMed:25764979, ECO:0000269|PubMed:25997101}; Single-pass membrane protein {ECO:0000255}. Mitochondrion {ECO:0000269|PubMed:25781180}.	Component of the MICOS complex, a large protein complex of the mitochondrial inner membrane that plays crucial roles in the maintenance of crista junctions, inner membrane architecture, and formation of contact sites to the outer membrane. Plays an important role in the maintenance of the MICOS complex stability and the mitochondrial cristae morphology (PubMed:22114354, PubMed:25781180). {ECO:000…	TRANSMEM 46..64; /note="Helical"; /evidence="ECO:0000255"	1.41729e+07	1.27986e+07	1.54739e+07	1.3856e+07	1.25554e+07	1.71697e+07	2.09116e+07	1.49538e+07	1.6104e+07	1.99476e+07	9.70772e+06	1.37288e+07	0.0380909	0.085137	0.292052	0.734295	0.0315567	0.0343736	8	6	10	7	8	7	7	7	9	6	5	8
UDP-glucose 6-dehydrogenase OS=Homo sapiens OX=9606 GN=UGDH PE=1 SV=1	UGDH	O60701	55025.3	0	Catalyzes the formation of UDP-alpha-D-glucuronate, a constituent of complex glycosaminoglycans (PubMed:21961565, PubMed:21502315, PubMed:23106432, PubMed:22123821, PubMed:25478983, PubMed:27966912, PubMed:30420606, PubMed:30457329). Required for the biosynthesis of chondroitin sulfate and heparan sulfate. Required for embryonic development via its role in the biosynthesis of glycosaminoglycans (…	0	2.76264e+06	3.06374e+06	2.71917e+06	2.27068e+06	4.53686e+06	3.17438e+06	4.30464e+06	2.75869e+06	3.39254e+06	5.48371e+06	3.42024e+06	4.08192e+06	0.224145	0.290011	0.291068	0.620109	0.603698	1.12654	0	0	3	0	0	0	0	0	0	0	0	0
Signal recognition particle receptor subunit beta OS=Homo sapiens OX=9606 GN=SRPRB PE=1 SV=3	SRPRB	Q9Y5M8	29703.1	Endoplasmic reticulum membrane {ECO:0000250}; Single-pass membrane protein {ECO:0000250}.	Component of the SRP (signal recognition particle) receptor. Ensures, in conjunction with the signal recognition particle, the correct targeting of the nascent secretory proteins to the endoplasmic reticulum membrane system. Has GTPase activity. May mediate the membrane association of SRPR (By similarity). {ECO:0000250}.	TRANSMEM 37..57; /note="Helical"; /evidence="ECO:0000255"	8.46237e+06	9.06694e+06	1.12941e+07	1.20368e+07	1.28114e+07	1.463e+07	9.00887e+06	1.52235e+07	1.10257e+07	1.43536e+07	8.40175e+06	7.09987e+06	0.453818	1.43147	0.290714	0.45746	0.0507432	0.0493106	7	6	5	6	8	7	4	4	7	4	5	4
60S ribosomal protein L13 OS=Homo sapiens OX=9606 GN=RPL13 PE=1 SV=4	RPL13	P26373	24262.2	Cytoplasm {ECO:0000305|PubMed:31630789}.	Component of the ribosome, a large ribonucleoprotein complex responsible for the synthesis of proteins in the cell (PubMed:31630789, PubMed:23636399). The small ribosomal subunit (SSU) binds messenger RNAs (mRNAs) and translates the encoded message by selecting cognate aminoacyl-transfer RNA (tRNA) molecules (Probable). The large subunit (LSU) contains the ribosomal catalytic site termed the pept…	0	1.71349e+07	1.66293e+07	1.31403e+07	1.8741e+07	1.98268e+07	1.9877e+07	2.04317e+07	1.45394e+07	2.24002e+07	1.76637e+07	2.30603e+07	2.01162e+07	0.317349	1.37187	0.290603	0.581568	0.3753	1.09055	4	4	4	5	5	5	5	4	6	3	4	4
Serine palmitoyltransferase 2 OS=Homo sapiens OX=9606 GN=SPTLC2 PE=1 SV=1	SPTLC2	O15270	62925.7	Endoplasmic reticulum membrane {ECO:0000250|UniProtKB:P97363}; Single-pass membrane protein {ECO:0000250|UniProtKB:P97363}.	Serine palmitoyltransferase (SPT). The heterodimer formed with LCB1/SPTLC1 constitutes the catalytic core. The composition of the serine palmitoyltransferase (SPT) complex determines the substrate preference. The SPTLC1-SPTLC2-SPTSSA complex shows a strong preference for C16-CoA substrate, while the SPTLC1-SPTLC2-SPTSSB complex displays a preference for C18-CoA substrate. Plays an important role …	TRANSMEM 67..87; /note="Helical"; /evidence="ECO:0000255"	1.95264e+06	2.5435e+06	2.01979e+06	849977	3.86243e+06	2.46379e+06	2.08394e+06	2.70555e+06	3.18016e+06	2.08278e+06	2.41348e+06	2.89436e+06	0.139248	0.0878348	0.290546	0.587396	0.181725	0.412186	2	0	2	2	3	2	0	0	3	0	0	0
Prostaglandin E synthase 3 OS=Homo sapiens OX=9606 GN=PTGES3 PE=1 SV=1	PTGES3	Q15185	18697.9	Cytoplasm {ECO:0000250|UniProtKB:Q3ZBF7}.	Cytosolic prostaglandin synthase that catalyzes the oxidoreduction of prostaglandin endoperoxide H2 (PGH2) to prostaglandin E2 (PGE2) (PubMed:10922363). Molecular chaperone that localizes to genomic response elements in a hormone-dependent manner and disrupts receptor-mediated transcriptional activation, by promoting disassembly of transcriptional regulatory complexes (PubMed:11274138, PubMed:120…	0	5.67766e+06	6.11254e+06	7.69671e+06	8.36935e+06	6.22232e+06	5.42957e+06	1.04325e+07	7.36999e+06	6.02412e+06	5.51457e+06	6.95002e+06	6.23228e+06	0.0390254	0.0574885	0.290067	0.429017	-0.0597092	0.130755	0	0	2	0	0	0	0	0	0	0	0	0
Procollagen-lysine,2-oxoglutarate 5-dioxygenase 2 OS=Homo sapiens OX=9606 GN=PLOD2 PE=1 SV=2	PLOD2	O00469	84687.4	Rough endoplasmic reticulum membrane; Peripheral membrane protein; Lumenal side.	Forms hydroxylysine residues in -Xaa-Lys-Gly- sequences in collagens. These hydroxylysines serve as sites of attachment for carbohydrate units and are essential for the stability of the intermolecular collagen cross-links. {ECO:0000250|UniProtKB:P24802}.	0	3.54078e+06	3.69251e+06	2.04046e+06	2.32777e+06	2.93234e+06	3.17296e+06	2.74897e+06	4.73751e+06	3.83716e+06	2.8226e+06	3.31635e+06	4.46785e+06	-0.137095	0.182798	0.288113	0.366032	0.193764	0.244496	0	0	2	0	0	0	0	0	0	0	0	0
Non-POU domain-containing octamer-binding protein OS=Homo sapiens OX=9606 GN=NONO PE=1 SV=4	NONO	Q15233	54231.6	Nucleus. Nucleus, nucleolus. Nucleus speckle. Note=Detected in punctate subnuclear structures often located adjacent to splicing speckles, called paraspeckles.	DNA- and RNA binding protein, involved in several nuclear processes. Binds the conventional octamer sequence in double-stranded DNA. Also binds single-stranded DNA and RNA at a site independent of the duplex site. Involved in pre-mRNA splicing, probably as a heterodimer with SFPQ. Interacts with U5 snRNA, probably by binding to a purine-rich sequence located on the 3' side of U5 snRNA stem 1b. To…	0	2.16618e+07	1.8765e+07	1.46876e+07	2.07228e+07	3.06296e+07	3.03674e+07	2.27631e+07	2.42854e+07	2.0193e+07	6.65131e+07	4.60161e+07	4.7123e+07	0.568255	1.08688	0.286922	0.794805	1.53443	2.12837	10	10	10	10	15	14	11	10	12	14	15	13
28S ribosomal protein S29, mitochondrial OS=Homo sapiens OX=9606 GN=DAP3 PE=1 SV=1	DAP3	P51398	45567.7	Mitochondrion {ECO:0000269|PubMed:11162496, ECO:0000269|PubMed:20563667}.	Involved in mediating interferon-gamma-induced cell death.	0	3.12786e+06	5.12581e+06	1.3627e+06	3.52068e+06	7.24069e+06	2.16791e+06	3.33133e+06	4.44308e+06	3.94274e+06	3.5731e+06	5.29745e+06	1.59216e+06	0.427076	0.232252	0.285056	0.243996	0.12169	0.0643449	3	4	2	3	6	2	2	0	3	0	3	2
Keratin, type II cytoskeletal 2 epidermal OS=Homo sapiens OX=9606 GN=KRT2 PE=1 SV=2	KRT2	P35908	65433.9	0	Probably contributes to terminal cornification (PubMed:1380918). Associated with keratinocyte activation, proliferation and keratinization (PubMed:12598329). Plays a role in the establishment of the epidermal barrier on plantar skin (By similarity). {ECO:0000250|UniProtKB:Q3TTY5, ECO:0000269|PubMed:12598329, ECO:0000269|PubMed:1380918}.	0	4.90417e+07	5.03141e+07	1.14014e+08	4.99338e+07	4.97463e+07	4.78528e+07	1.50845e+08	5.66187e+07	5.24911e+07	1.46254e+08	2.14451e+08	4.23409e+07	-0.532322	0.438576	0.284902	0.149844	0.917588	0.508516	23	22	32	25	24	22	39	22	23	29	43	22
Structural maintenance of chromosomes flexible hinge domain-containing protein 1 OS=Homo sapiens OX=9606 GN=SMCHD1 PE=1 SV=2	SMCHD1	A6NHR9	226380	Chromosome {ECO:0000269|PubMed:24790221, ECO:0000269|PubMed:25294876}. Note=Recruited to inactivated chromosome X in females by Xist RNA (By similarity). Localizes at sites of DNA damage at double-strand breaks (DSBs) (PubMed:25294876, PubMed:24790221). {ECO:0000250|UniProtKB:Q6P5D8, ECO:0000269|PubMed:24790221, ECO:0000269|PubMed:25294876}.	Non-canonical member of the structural maintenance of chromosomes (SMC) protein family that plays a key role in epigenetic silencing by regulating chromatin architecture (By similarity). Promotes heterochromatin formation in both autosomes and chromosome X, probably by mediating the merge of chromatin compartments (By similarity). Plays a key role in chromosome X inactivation in females by promot…	0	3.7498e+06	2.32585e+06	3.38953e+06	5.19002e+06	8.1744e+06	3.85592e+06	3.63384e+06	2.10376e+06	5.78408e+06	3.34417e+06	1.84293e+06	4.61536e+06	0.863413	0.895341	0.28365	0.234214	0.0505155	0.0421806	5	4	5	6	9	5	3	2	6	2	2	4
ATP synthase mitochondrial F1 complex assembly factor 1 OS=Homo sapiens OX=9606 GN=ATPAF1 PE=1 SV=1	ATPAF1	Q5TC12	36436.9	Mitochondrion {ECO:0000250}.	May play an essential role for the assembly of the mitochondrial F1-F0 complex. {ECO:0000250}.	0	1.9011e+06	2.16417e+06	2.52311e+06	1.889e+06	2.79469e+06	2.97462e+06	2.64471e+06	2.71925e+06	2.651e+06	3.87718e+06	2.3786e+06	2.55461e+06	0.217101	0.395235	0.282771	1.22839	0.419281	0.663163	0	0	0	0	2	0	0	0	0	0	0	0
Mannose-P-dolichol utilization defect 1 protein OS=Homo sapiens OX=9606 GN=MPDU1 PE=1 SV=2	MPDU1	O75352	26638.6	Membrane {ECO:0000305}; Multi-pass membrane protein {ECO:0000305}.	Required for normal utilization of mannose-dolichol phosphate (Dol-P-Man) in the synthesis of N-linked and O-linked oligosaccharides and GPI anchors. {ECO:0000250}.	TRANSMEM 37..57; /note="Helical"; /evidence="ECO:0000255"; TRANSMEM 74..94; /note="Helical"; /evidence="ECO:0000255"; TRANSMEM 100..120; /note="Helical"; /evidence="ECO:0000255"; TRANSMEM 128..145; /note="Helical"; /evidence="ECO:0000255"; TRANSMEM 151..171; /note="Helical"; /evidence="ECO:0000255"; TRANSMEM 185..205; /note="Helical"; /evidence="ECO:0000255"; TRANSMEM 213..233; /note="Helical"; /…	3.36209e+06	5.30847e+06	3.19548e+06	5.52142e+06	4.59325e+06	5.10054e+06	4.02112e+06	3.6431e+06	6.75445e+06	4.22967e+06	4.30181e+06	5.57574e+06	0.358676	0.697594	0.281099	0.288383	0.249595	0.390452	2	2	2	2	0	0	0	0	2	0	0	0
Protein PRRC2C OS=Homo sapiens OX=9606 GN=PRRC2C PE=1 SV=4	PRRC2C	Q9Y520	316908	Cytoplasm, Stress granule {ECO:0000305|PubMed:29395067}.	Required for efficient formation of stress granules. {ECO:0000269|PubMed:29395067}.	0	916851	1.24429e+06	1.0203e+06	1.46051e+06	2.11036e+06	1.02535e+06	1.4362e+06	1.34475e+06	1.08398e+06	2.06798e+06	1.24833e+06	1.63869e+06	0.530768	0.646123	0.280763	0.72924	0.639205	1.08712	0	0	2	0	0	0	2	0	4	2	0	2
Aspartate--tRNA ligase, mitochondrial OS=Homo sapiens OX=9606 GN=DARS2 PE=1 SV=1	DARS2	Q6PI48	73565	Mitochondrion matrix {ECO:0000269|PubMed:15779907}.	0	0	2.75242e+07	2.61005e+07	3.11532e+07	1.99638e+07	3.4142e+07	2.67865e+07	3.16546e+07	3.14387e+07	3.98941e+07	2.70328e+07	2.73513e+07	3.16125e+07	-0.0676855	0.107195	0.280709	0.894588	0.0205915	0.0672471	12	10	13	5	10	11	9	10	13	6	8	11
Protein arginine N-methyltransferase 5 OS=Homo sapiens OX=9606 GN=PRMT5 PE=1 SV=4	PRMT5	O14744	72685.1	Cytoplasm {ECO:0000269|PubMed:21081503, ECO:0000269|PubMed:21917714, ECO:0000269|PubMed:22269951}. Nucleus {ECO:0000269|PubMed:18404153, ECO:0000269|PubMed:21081503, ECO:0000269|PubMed:21917714, ECO:0000269|PubMed:22269951}. Golgi apparatus {ECO:0000269|PubMed:20421892}.	Arginine methyltransferase that can both catalyze the formation of omega-N monomethylarginine (MMA) and symmetrical dimethylarginine (sDMA), with a preference for the formation of MMA (PubMed:10531356, PubMed:11152681, PubMed:11747828, PubMed:12411503, PubMed:15737618, PubMed:17709427, PubMed:20159986, PubMed:20810653, PubMed:21258366, PubMed:21917714, PubMed:22269951, PubMed:21081503). Specifica…	0	3.3486e+06	4.45106e+06	2.31931e+06	3.32952e+06	3.91972e+06	3.41176e+06	2.5427e+06	5.07453e+06	4.6736e+06	6.80672e+06	4.042e+06	3.38169e+06	0.0752796	0.100988	0.28052	0.293794	0.491914	0.490973	0	0	2	2	2	0	0	0	3	0	0	3
Nuclear pore complex protein Nup133 OS=Homo sapiens OX=9606 GN=NUP133 PE=1 SV=2	NUP133	Q8WUM0	128984	Nucleus, nuclear pore complex {ECO:0000269|PubMed:11564755, ECO:0000269|PubMed:11684705}. Chromosome, centromere, kinetochore {ECO:0000269|PubMed:11564755}. Note=Located on both the cytoplasmic and nuclear sides of the nuclear pore (PubMed:11564755). During mitosis, localizes to the kinetochores (PubMed:11564755). {ECO:0000269|PubMed:11564755, ECO:0000269|PubMed:11684705}.	Involved in poly(A)+ RNA transport. Involved in nephrogenesis (PubMed:30179222). {ECO:0000269|PubMed:11684705, ECO:0000269|PubMed:30179222}.	0	1.22145e+06	1.06839e+06	1.17293e+06	1.23112e+06	460235	1.38757e+06	1.58322e+06	1.10755e+06	1.5101e+06	680984	1.57354e+06	2.01662e+06	-0.1695	0.166202	0.27876	0.728648	0.302696	0.27332	0	0	2	0	0	0	0	0	0	0	0	0
E3 SUMO-protein ligase RanBP2 OS=Homo sapiens OX=9606 GN=RANBP2 PE=1 SV=2	RANBP2	P49792	358198	Nucleus {ECO:0000269|PubMed:7775481}. Nucleus membrane {ECO:0000269|PubMed:11839768}. Nucleus, nuclear pore complex {ECO:0000269|PubMed:11839768, ECO:0000269|PubMed:20386726, ECO:0000269|PubMed:23353830, ECO:0000269|PubMed:7603572}. Nucleus envelope {ECO:0000269|PubMed:20386726}. Note=Detected in diffuse and discrete intranuclear foci (PubMed:11839768). Cytoplasmic filaments (PubMed:7775481). {EC…	E3 SUMO-protein ligase which facilitates SUMO1 and SUMO2 conjugation by UBE2I (PubMed:11792325, PubMed:12032081, PubMed:15378033, PubMed:22194619, PubMed:15931224). Involved in transport factor (Ran-GTP, karyopherin)-mediated protein import via the F-G repeat-containing domain which acts as a docking site for substrates (PubMed:7775481). Binds single-stranded RNA (in vitro) (PubMed:7775481). May …	0	2.01445e+06	1.73334e+06	775620	1.33122e+06	3.19354e+06	1.71108e+06	1.71066e+06	1.37671e+06	2.39674e+06	1.48484e+06	980511	1.52343e+06	0.463174	0.34783	0.277846	0.26641	-0.181463	0.16186	3	0	2	0	5	0	0	0	0	0	0	3
Ras-related protein Rab-9A OS=Homo sapiens OX=9606 GN=RAB9A PE=1 SV=1	RAB9A	P51151	22837.8	Cell membrane {ECO:0000305}; Lipid-anchor {ECO:0000305}; Cytoplasmic side {ECO:0000305}. Endoplasmic reticulum membrane {ECO:0000305}. Golgi apparatus membrane {ECO:0000305}. Late endosome {ECO:0000269|PubMed:16176980}. Cytoplasmic vesicle, phagosome membrane {ECO:0000305}; Lipid-anchor {ECO:0000305}; Cytoplasmic side {ECO:0000305}. Cytoplasmic vesicle, phagosome {ECO:0000269|PubMed:21255211}. Cy…	Involved in the transport of proteins between the endosomes and the trans Golgi network. Involved in the recruitment of SGSM2 to melanosomes and is required for the proper trafficking of melanogenic enzymes TYR, TYRP1 and DCT/TYRP2 to melanosomes in melanocytes. {ECO:0000250|UniProtKB:P24408, ECO:0000250|UniProtKB:Q9R0M6}.	0	4.46291e+06	5.24468e+06	3.21992e+06	4.37807e+06	4.66415e+06	4.21457e+06	5.30799e+06	4.5219e+06	5.81718e+06	4.32588e+06	5.35891e+06	4.23492e+06	0.0362873	0.063167	0.275448	0.577102	0.106685	0.182311	2	0	2	3	0	0	0	0	3	0	0	0
Elongation factor 1-delta OS=Homo sapiens OX=9606 GN=EEF1D PE=1 SV=5	EEF1D	P29692	31121.9	[Isoform 2]: Nucleus {ECO:0000269|PubMed:21597468}.	[Isoform 1]: EF-1-beta and EF-1-delta stimulate the exchange of GDP bound to EF-1-alpha to GTP, regenerating EF-1-alpha for another round of transfer of aminoacyl-tRNAs to the ribosome.; [Isoform 2]: Regulates induction of heat-shock-responsive genes through association with heat shock transcription factors and direct DNA-binding at heat shock promoter elements (HSE).	0	2.19771e+06	2.28513e+06	1.61521e+06	1.56272e+06	3.40621e+06	3.73047e+06	2.09772e+06	2.6721e+06	2.60971e+06	2.36451e+06	2.46184e+06	1.98942e+06	0.512567	0.541652	0.27518	0.700517	0.160528	0.396841	2	0	0	2	3	2	2	0	0	0	2	2
Ribosome maturation protein SBDS OS=Homo sapiens OX=9606 GN=SBDS PE=1 SV=4	SBDS	Q9Y3A5	28763.9	Cytoplasm. Nucleus, nucleolus. Nucleus, nucleoplasm. Cytoplasm, cytoskeleton, spindle. Note=Primarily detected in the cytoplasm, and at low levels in nucleus and nucleolus (PubMed:19602484 and PubMed:17475909). Detected in the nucleolus during G1 and G2 phase of the cell cycle, and diffusely distributed in the nucleus during S phase. Detected at the mitotic spindle. Colocalizes with the microtubu…	Required for the assembly of mature ribosomes and ribosome biogenesis. Together with EFL1, triggers the GTP-dependent release of EIF6 from 60S pre-ribosomes in the cytoplasm, thereby activating ribosomes for translation competence by allowing 80S ribosome assembly and facilitating EIF6 recycling to the nucleus, where it is required for 60S rRNA processing and nuclear export. Required for normal l…	0	3.02882e+06	4.26978e+06	2.7212e+06	3.36231e+06	3.18639e+06	2.36148e+06	3.81189e+06	3.08971e+06	5.21852e+06	3.33059e+06	2.94113e+06	2.17712e+06	-0.169327	0.260886	0.27455	0.374331	-0.246029	0.377601	0	0	2	0	0	0	0	0	0	0	0	0
60S ribosomal protein L27a OS=Homo sapiens OX=9606 GN=RPL27A PE=1 SV=2	RPL27A	P46776	16561.4	0	0	0	2.05432e+07	2.0701e+07	1.63619e+07	1.70861e+07	2.45481e+07	1.32461e+07	2.20341e+07	1.8833e+07	2.87623e+07	1.87616e+07	1.02185e+07	1.7777e+07	-0.0699309	0.0895573	0.273475	0.544579	-0.301035	0.520941	4	2	4	5	4	4	3	3	5	3	3	5
Drebrin OS=Homo sapiens OX=9606 GN=DBN1 PE=1 SV=4	DBN1	Q16643	71428.6	Cytoplasm {ECO:0000269|PubMed:20215400, ECO:0000269|PubMed:28966017, ECO:0000269|PubMed:8838578}. Cell projection, dendrite {ECO:0000269|PubMed:8838578}. Cytoplasm, cell cortex {ECO:0000269|PubMed:20215400}. Cell junction {ECO:0000269|PubMed:20215400}. Cell projection, growth cone {ECO:0000250|UniProtKB:Q9QXS6}. Note=In the absence of antigen, evenly distributed throughout subcortical regions of …	Actin cytoskeleton-organizing protein that plays a role in the formation of cell projections (PubMed:20215400). Required for actin polymerization at immunological synapses (IS) and for the recruitment of the chemokine receptor CXCR4 to IS (PubMed:20215400). Plays a role in dendritic spine morphogenesis and organization, including the localization of the dopamine receptor DRD1 to the dendritic spi…	0	1.59624e+06	1.5954e+06	2.20825e+06	1.80865e+06	3.68791e+06	2.56442e+06	2.14351e+06	2.54595e+06	1.83153e+06	978810	2.87719e+06	2.73674e+06	0.578024	0.693144	0.272157	0.572151	0.287947	0.243862	0	0	2	0	3	0	0	0	0	0	0	2
Heat shock protein 75 kDa, mitochondrial OS=Homo sapiens OX=9606 GN=TRAP1 PE=1 SV=3	TRAP1	Q12931	80112.9	Mitochondrion {ECO:0000269|PubMed:23564345}. Mitochondrion inner membrane {ECO:0000269|PubMed:23564345}. Mitochondrion matrix {ECO:0000269|PubMed:23564345}.	Chaperone that expresses an ATPase activity. Involved in maintaining mitochondrial function and polarization, downstream of PINK1 and mitochondrial complex I. Is a negative regulator of mitochondrial respiration able to modulate the balance between oxidative phosphorylation and aerobic glycolysis. The impact of TRAP1 on mitochondrial respiration is probably mediated by modulation of mitochondrial…	0	1.55893e+08	1.76815e+08	1.0198e+08	1.26058e+08	105475667	1.75739e+08	1.87389e+08	1.75675e+08	1.61467e+08	1.5879e+08	1.48491e+08	1.26169e+08	-0.0939834	0.10814	0.271052	0.565686	-0.00411382	0.00556956	27	22	27	26	21	29	24	24	25	15	20	16
Erlin-1 OS=Homo sapiens OX=9606 GN=ERLIN1 PE=1 SV=2	ERLIN1	O75477	39172	Endoplasmic reticulum membrane {ECO:0000269|PubMed:11118313, ECO:0000269|PubMed:16835267, ECO:0000269|PubMed:19240031}; Single-pass type II membrane protein {ECO:0000269|PubMed:11118313, ECO:0000269|PubMed:16835267, ECO:0000269|PubMed:19240031}. Note=Associated with lipid raft-like domains of the endoplasmic reticulum membrane.	Component of the ERLIN1/ERLIN2 complex which mediates the endoplasmic reticulum-associated degradation (ERAD) of inositol 1,4,5-trisphosphate receptors (IP3Rs). Involved in regulation of cellular cholesterol homeostasis by regulation the SREBP signaling pathway. Binds cholesterol and may promote ER retention of the SCAP-SREBF complex (PubMed:24217618). {ECO:0000269|PubMed:19240031, ECO:0000269|Pu…	TRANSMEM 8..28; /note="Helical"; /evidence="ECO:0000255"	4.96831e+06	5.85479e+06	2.23393e+06	5.14531e+06	5.32411e+06	9.9632e+06	5.84383e+06	5.91416e+06	3.9935e+06	7.94205e+06	2.51773e+06	4.70648e+06	0.646047	0.570378	0.270661	0.288415	0.216039	0.13537	3	3	2	0	3	4	0	0	3	0	0	0
Ubiquitin carboxyl-terminal hydrolase isozyme L1 OS=Homo sapiens OX=9606 GN=UCHL1 PE=1 SV=2	UCHL1	P09936	24824.3	Cytoplasm {ECO:0000269|PubMed:19261853}. Endoplasmic reticulum membrane {ECO:0000269|PubMed:19261853}; Lipid-anchor {ECO:0000269|PubMed:19261853}. Note=About 30% of total UCHL1 is associated with membranes in brain.	Ubiquitin-protein hydrolase involved both in the processing of ubiquitin precursors and of ubiquitinated proteins (Probable). This enzyme is a thiol protease that recognizes and hydrolyzes a peptide bond at the C-terminal glycine of ubiquitin (PubMed:9774100, PubMed:8639624, PubMed:12408865, PubMed:23359680). Also binds to free monoubiquitin and may prevent its degradation in lysosomes (By simila…	0	4.0632e+06	4.15157e+06	4.53732e+06	5.06458e+06	4.74182e+06	5.03653e+06	6.10813e+06	4.48106e+06	4.79251e+06	7.61085e+06	4.25825e+06	7.9133e+06	0.219042	1.75796	0.270482	0.777846	0.633483	0.927962	0	0	0	2	0	0	0	0	2	0	0	4
Threonine--tRNA ligase, mitochondrial OS=Homo sapiens OX=9606 GN=TARS2 PE=1 SV=1	TARS2	Q9BW92	81037.5	Mitochondrion matrix {ECO:0000250}.	Catalyzes the attachment of threonine to tRNA(Thr) in a two-step reaction: threonine is first activated by ATP to form Thr-AMP and then transferred to the acceptor end of tRNA(Thr). Also edits incorrectly charged tRNA(Thr) via its editing domain. {ECO:0000269|PubMed:26811336}.	0	7.19197e+06	6.94395e+06	7.21177e+06	1.39971e+07	1.15144e+07	1.5538e+07	1.12305e+07	5.22593e+06	9.26306e+06	3.74247e+06	2.30784e+06	6.62592e+06	0.943289	2.29836	0.268782	0.340602	-0.751954	1.0675	5	4	4	7	6	7	5	3	6	2	2	4
DNA-directed RNA polymerase I subunit RPA2 OS=Homo sapiens OX=9606 GN=POLR1B PE=1 SV=2	POLR1B	Q9H9Y6	128233	Nucleus, nucleolus {ECO:0000269|PubMed:11250903}.	DNA-dependent RNA polymerase catalyzes the transcription of DNA into RNA using the four ribonucleoside triphosphates as substrates. Second largest core component of RNA polymerase I which synthesizes ribosomal RNA precursors. Proposed to contribute to the polymerase catalytic activity and forms the polymerase active center together with the largest subunit. Pol I is composed of mobile elements an…	0	3.19718e+06	3.00785e+06	3.75108e+06	3.01557e+06	3.10098e+06	2.95534e+06	2.86104e+06	3.54811e+06	5.57396e+06	3.20309e+06	5.10933e+06	3.76643e+06	-0.134177	0.578603	0.267349	0.329396	0.278831	0.509965	2	2	4	3	0	2	0	0	6	0	0	0
Ras-related protein Rab-14 OS=Homo sapiens OX=9606 GN=RAB14 PE=1 SV=4	RAB14	P61106	23897.6	Recycling endosome {ECO:0000269|PubMed:22595670}. Early endosome membrane {ECO:0000269|PubMed:16962593}; Lipid-anchor {ECO:0000305}; Cytoplasmic side {ECO:0000305}. Golgi apparatus membrane {ECO:0000269|PubMed:16962593}; Lipid-anchor {ECO:0000305}; Cytoplasmic side {ECO:0000305}. Golgi apparatus, trans-Golgi network membrane {ECO:0000269|PubMed:16962593}; Lipid-anchor {ECO:0000305}; Cytoplasmic s…	Involved in membrane trafficking between the Golgi complex and endosomes during early embryonic development. Regulates the Golgi to endosome transport of FGFR-containing vesicles during early development, a key process for developing basement membrane and epiblast and primitive endoderm lineages during early postimplantation development. May act by modulating the kinesin KIF16B-cargo association …	0	2.81224e+06	3.43884e+06	2.98666e+06	4.04399e+06	2.14084e+06	3.51959e+06	2.34253e+06	5.41297e+06	3.34715e+06	2.63376e+06	3.50533e+06	2.44288e+06	0.071104	0.0928944	0.265293	0.269614	-0.106228	0.227146	0	0	0	0	0	0	0	0	2	0	0	0
Lanosterol synthase OS=Homo sapiens OX=9606 GN=LSS PE=1 SV=1	LSS	P48449	83310	Endoplasmic reticulum membrane {ECO:0000269|PubMed:14766201, ECO:0000269|PubMed:15525992, ECO:0000269|PubMed:30401459}; Peripheral membrane protein {ECO:0000269|PubMed:14766201, ECO:0000269|PubMed:15525992}.	Key enzyme in the cholesterol biosynthesis pathway. Catalyzes the cyclization of (S)-2,3 oxidosqualene to lanosterol, a reaction that forms the sterol nucleus (PubMed:14766201, PubMed:7639730, PubMed:26200341). Through the production of lanosterol may regulate lens protein aggregation and increase transparency (PubMed:26200341). {ECO:0000269|PubMed:14766201, ECO:0000269|PubMed:26200341, ECO:00002…	0	2.40433e+06	2.78423e+06	2.41826e+06	2.451e+06	6.70693e+06	5.92725e+06	2.42251e+06	3.55816e+06	3.15543e+06	2.8052e+06	2.07427e+06	3.24973e+06	0.987766	0.88373	0.264285	0.649209	0.0958199	0.181891	3	3	3	2	6	4	3	0	4	0	2	0
Dolichyl-diphosphooligosaccharide--protein glycosyltransferase subunit STT3A OS=Homo sapiens OX=9606 GN=STT3A PE=1 SV=2	STT3A	P46977	80532.8	Endoplasmic reticulum {ECO:0000269|PubMed:12887896}. Endoplasmic reticulum membrane {ECO:0000250|UniProtKB:P46978}; Multi-pass membrane protein {ECO:0000250|UniProtKB:P46978}.	Catalytic subunit of the oligosaccharyl transferase (OST) complex that catalyzes the initial transfer of a defined glycan (Glc(3)Man(9)GlcNAc(2) in eukaryotes) from the lipid carrier dolichol-pyrophosphate to an asparagine residue within an Asn-X-Ser/Thr consensus motif in nascent polypeptide chains, the first step in protein N-glycosylation. N-glycosylation occurs cotranslationally and the compl…	TRANSMEM 18..38; /note="Helical"; /evidence="ECO:0000255"; TRANSMEM 120..138; /note="Helical"; /evidence="ECO:0000250|UniProtKB:P39007"; TRANSMEM 141..158; /note="Helical"; /evidence="ECO:0000250|UniProtKB:P39007"; TRANSMEM 170..189; /note="Helical"; /evidence="ECO:0000250|UniProtKB:P39007"; TRANSMEM 192..206; /note="Helical"; /evidence="ECO:0000250|UniProtKB:P39007"; TRANSMEM 212..228; /note="He…	2.31508e+07	3.40709e+07	1.00761e+07	7.69467e+06	2.70365e+07	7.71212e+06	2.48506e+07	2.4271e+07	3.16538e+07	1.41766e+07	2.32735e+07	7.72116e+06	-0.665023	0.365583	0.263357	0.241793	-0.575151	0.373571	8	8	8	5	10	3	6	6	9	5	5	4
Cytochrome c1, heme protein, mitochondrial OS=Homo sapiens OX=9606 GN=CYC1 PE=1 SV=3	CYC1	P08574	35422.8	Mitochondrion inner membrane {ECO:0000250|UniProtKB:P07143}; Single-pass membrane protein {ECO:0000250|UniProtKB:P07143}.	Component of the ubiquinol-cytochrome c oxidoreductase, a multisubunit transmembrane complex that is part of the mitochondrial electron transport chain which drives oxidative phosphorylation. The respiratory chain contains 3 multisubunit complexes succinate dehydrogenase (complex II, CII), ubiquinol-cytochrome c oxidoreductase (cytochrome b-c1 complex, complex III, CIII) and cytochrome c oxidase …	TRANSMEM 282..315; /note="Helical"; /evidence="ECO:0000269|PubMed:28844695"	5.10636e+06	5.57181e+06	5.16332e+06	3.93029e+06	3.74293e+06	7.80096e+06	5.68396e+06	7.10318e+06	6.22552e+06	6.3588e+06	8.67811e+06	4.82907e+06	-0.0338459	0.0309987	0.263251	1.13311	0.326591	0.522485	3	2	3	3	3	3	2	2	3	0	3	0
Signal transducer and activator of transcription 1-alpha/beta OS=Homo sapiens OX=9606 GN=STAT1 PE=1 SV=2	STAT1	P42224	87336.9	Cytoplasm {ECO:0000269|PubMed:15322115, ECO:0000269|PubMed:26479788, ECO:0000269|PubMed:27796300, ECO:0000269|PubMed:28753426}. Nucleus {ECO:0000269|PubMed:15322115, ECO:0000269|PubMed:26479788, ECO:0000269|PubMed:28753426}. Note=Translocated into the nucleus upon tyrosine phosphorylation and dimerization, in response to IFN-gamma and signaling by activated FGFR1, FGFR2, FGFR3 or FGFR4 (PubMed:15…	Signal transducer and transcription activator that mediates cellular responses to interferons (IFNs), cytokine KITLG/SCF and other cytokines and other growth factors. Following type I IFN (IFN-alpha and IFN-beta) binding to cell surface receptors, signaling via protein kinases leads to activation of Jak kinases (TYK2 and JAK1) and to tyrosine phosphorylation of STAT1 and STAT2. The phosphorylated…	0	5.15419e+06	5.81036e+06	5.80394e+06	5.54007e+06	7.72919e+06	6.12772e+06	5.64124e+06	8.19919e+06	6.26554e+06	8.71844e+06	7.99546e+06	9.68084e+06	0.210079	0.564399	0.261871	0.625636	0.654497	2.41179	0	0	0	3	0	0	0	0	0	0	0	0
Cleavage and polyadenylation specificity factor subunit 2 OS=Homo sapiens OX=9606 GN=CPSF2 PE=1 SV=2	CPSF2	Q9P2I0	88489.5	Nucleus {ECO:0000305}.	Component of the cleavage and polyadenylation specificity factor (CPSF) complex that play a key role in pre-mRNA 3'-end formation, recognizing the AAUAAA signal sequence and interacting with poly(A) polymerase and other factors to bring about cleavage and poly(A) addition. Involved in the histone 3' end pre-mRNA processing. {ECO:0000269|PubMed:14749727, ECO:0000269|PubMed:18688255}.	0	2.7646e+06	4.03352e+06	1.92265e+06	4.13728e+06	4.65874e+06	1.06831e+06	2.84583e+06	3.02088e+06	4.57607e+06	2.62325e+06	3.27547e+06	4.26705e+06	0.177765	0.107796	0.259979	0.280381	0.221192	0.244734	2	2	2	2	3	2	0	0	2	0	0	2
Exosome complex component RRP40 OS=Homo sapiens OX=9606 GN=EXOSC3 PE=1 SV=3	EXOSC3	Q9NQT5	29572	Cytoplasm {ECO:0000269|PubMed:17545563}. Nucleus, nucleolus {ECO:0000269|PubMed:20531389}. Nucleus {ECO:0000269|PubMed:17545563}.	Non-catalytic component of the RNA exosome complex which has 3'->5' exoribonuclease activity and participates in a multitude of cellular RNA processing and degradation events. In the nucleus, the RNA exosome complex is involved in proper maturation of stable RNA species such as rRNA, snRNA and snoRNA, in the elimination of RNA processing by-products and non-coding 'pervasive' transcripts, such as…	0	2.43682e+06	3.01832e+06	2.32483e+06	2.8566e+06	3.50019e+06	3.53214e+06	2.83866e+06	3.25041e+06	3.22522e+06	4.51189e+06	2.58808e+06	3.84882e+06	0.346051	1.07423	0.259681	0.94617	0.492936	0.809349	0	0	2	0	0	0	0	0	0	0	0	0
Transcription elongation factor SPT5 OS=Homo sapiens OX=9606 GN=SUPT5H PE=1 SV=1	SUPT5H	O00267	121000	Nucleus {ECO:0000269|PubMed:10075709}.	Component of the DRB sensitivity-inducing factor complex (DSIF complex), which regulates mRNA processing and transcription elongation by RNA polymerase II. DSIF positively regulates mRNA capping by stimulating the mRNA guanylyltransferase activity of RNGTT/CAP1A. DSIF also acts cooperatively with the negative elongation factor complex (NELF complex) to enhance transcriptional pausing at sites pro…	0	1.76538e+06	2.92862e+06	2.14188e+06	2.65824e+06	2.62427e+06	3.04847e+06	2.64341e+06	2.7353e+06	2.79888e+06	5.91616e+06	4.12039e+06	4.67973e+06	0.285361	0.60576	0.258549	0.576178	1.10622	1.84906	2	3	3	3	2	3	0	3	3	3	3	3
ER membrane protein complex subunit 2 OS=Homo sapiens OX=9606 GN=EMC2 PE=1 SV=1	EMC2	Q15006	34834.8	Nucleus {ECO:0000250}. Cytoplasm {ECO:0000269|PubMed:22119785}.	0	0	3.38986e+06	2.85134e+06	2.01616e+06	2.50053e+06	2.53979e+06	2.56307e+06	3.94709e+06	2.92415e+06	3.00593e+06	2.85089e+06	2.89633e+06	3.14055e+06	-0.119038	0.211292	0.258418	0.449317	0.106141	0.197241	0	0	2	0	0	2	2	0	2	0	0	0
Integrator complex subunit 7 OS=Homo sapiens OX=9606 GN=INTS7 PE=1 SV=1	INTS7	Q9NVH2	106836	Nucleus {ECO:0000269|PubMed:21659603}. Chromosome {ECO:0000269|PubMed:21659603}. Cytoplasm {ECO:0000269|PubMed:23904267}. Note=Localizes to sites of DNA damage in a H2AX-independent manner.	Component of the Integrator (INT) complex, a complex involved in the small nuclear RNAs (snRNA) U1 and U2 transcription and in their 3'-box-dependent processing. The Integrator complex is associated with the C-terminal domain (CTD) of RNA polymerase II largest subunit (POLR2A) and is recruited to the U1 and U2 snRNAs genes (Probable). Plays a role in DNA damage response (DDR) signaling during the…	0	829896	1.46042e+06	1.76002e+06	1.3655e+06	1.51095e+06	1.36633e+06	1.56101e+06	1.40643e+06	1.86123e+06	2.22672e+06	1.45683e+06	1.7793e+06	0.066967	0.0814247	0.253587	0.353845	0.431615	0.595666	2	0	2	0	0	2	0	0	0	0	0	0
E3 ubiquitin-protein transferase MAEA OS=Homo sapiens OX=9606 GN=MAEA PE=1 SV=1	MAEA	Q7L5Y9	45287.6	Cytoplasm {ECO:0000250|UniProtKB:Q4VC33}. Nucleus, nucleoplasm {ECO:0000269|PubMed:17467196, ECO:0000269|PubMed:24143168, ECO:0000269|PubMed:29911972}. Nucleus matrix {ECO:0000269|PubMed:16510120}. Cell membrane {ECO:0000269|PubMed:9763581}. Cytoplasm, cytoskeleton {ECO:0000269|PubMed:16510120}. Note=Detected in a nuclear, speckled-like pattern (PubMed:16510120). Localized with condensed chromati…	Core component of the CTLH E3 ubiquitin-protein ligase complex that selectively accepts ubiquitin from UBE2H and mediates ubiquitination and subsequent proteasomal degradation of the transcription factor HBP1. MAEA and RMND5A are both required for catalytic activity of the CTLH E3 ubiquitin-protein ligase complex (PubMed:29911972). MAEA is required for normal cell proliferation (PubMed:29911972).…	0	1.39852e+06	1.20842e+06	1.38621e+06	2.15185e+06	1.36263e+06	1.75404e+06	1.74723e+06	1.46469e+06	1.54802e+06	1.4668e+06	1.55643e+06	2.18523e+06	0.399871	0.835771	0.253417	1.15673	0.383329	0.799257	2	0	2	2	0	2	0	0	0	0	0	0
Mediator of RNA polymerase II transcription subunit 1 OS=Homo sapiens OX=9606 GN=MED1 PE=1 SV=4	MED1	Q15648	168482	Nucleus {ECO:0000269|PubMed:15471764, ECO:0000269|PubMed:16314496, ECO:0000269|PubMed:16574658}. Note=A subset of the protein may enter the nucleolus subsequent to phosphorylation by MAPK1 or MAPK3.	Component of the Mediator complex, a coactivator involved in the regulated transcription of nearly all RNA polymerase II-dependent genes. Mediator functions as a bridge to convey information from gene-specific regulatory proteins to the basal RNA polymerase II transcription machinery. Mediator is recruited to promoters by direct interactions with regulatory proteins and serves as a scaffold for t…	0	6.01435e+06	5.70984e+06	5.68315e+06	5.80124e+06	6.44446e+06	7.52516e+06	5.73668e+06	4.27422e+06	1.07375e+07	5.85478e+06	5.76867e+06	5.21934e+06	0.183679	0.698642	0.253306	0.221697	-0.0475656	0.345725	0	2	0	0	0	0	0	2	2	0	0	0
Apoptotic chromatin condensation inducer in the nucleus OS=Homo sapiens OX=9606 GN=ACIN1 PE=1 SV=2	ACIN1	Q9UKV3	151862	Nucleus. Nucleus speckle. Nucleus, nucleoplasm. Note=Phosphorylation on Ser-1180 by SRPK2 redistributes it from the nuclear speckles to the nucleoplasm.	Auxiliary component of the splicing-dependent multiprotein exon junction complex (EJC) deposited at splice junction on mRNAs. The EJC is a dynamic structure consisting of core proteins and several peripheral nuclear and cytoplasmic associated factors that join the complex only transiently either during EJC assembly or during subsequent mRNA metabolism. Component of the ASAP complexes which bind R…	0	1.17513e+06	742446	897925	647330	843563	855451	908912	675910	1.76406e+06	1.02286e+06	942610	1.32373e+06	-0.262978	0.472643	0.250287	0.192436	0.224345	0.38751	0	0	2	0	0	0	3	0	0	0	0	3
Acidic leucine-rich nuclear phosphoprotein 32 family member A OS=Homo sapiens OX=9606 GN=ANP32A PE=1 SV=1	ANP32A	P39687	28586.1	Nucleus. Cytoplasm. Endoplasmic reticulum. Note=Translocates to the cytoplasm during the process of neuritogenesis (By similarity). Shuttles between nucleus and cytoplasm. {ECO:0000250}.	Implicated in a number of cellular processes, including proliferation, differentiation, caspase-dependent and caspase-independent apoptosis, suppression of transformation (tumor suppressor), inhibition of protein phosphatase 2A, regulation of mRNA trafficking and stability in association with ELAVL1, and inhibition of acetyltransferases as part of the INHAT (inhibitor of histone acetyltransferase…	0	6.32191e+06	7.97954e+06	6.16365e+06	7.27366e+06	4.20427e+06	8.33045e+06	1.02641e+07	7.93961e+06	6.13707e+06	7.77598e+06	1.00914e+07	1.36706e+07	-0.0470542	0.0552551	0.250211	0.413635	0.623928	0.954347	0	0	0	0	0	0	0	0	0	0	0	4
Probable ATP-dependent RNA helicase DDX5 OS=Homo sapiens OX=9606 GN=DDX5 PE=1 SV=1	DDX5	P17844	69149.7	Nucleus {ECO:0000269|PubMed:22034099}. Nucleus, nucleolus {ECO:0000269|PubMed:10837141, ECO:0000269|PubMed:1996094}. Cytoplasm {ECO:0000269|PubMed:22034099}. Note=During the G0 phase, predominantly located in the nucleus. Cytoplasmic levels increase during the G1/S phase. During the M phase, located at the vicinity of the condensed chromosomes. At G1, localizes in the cytoplasm. {ECO:0000269|PubM…	Involved in the alternative regulation of pre-mRNA splicing; its RNA helicase activity is necessary for increasing tau exon 10 inclusion and occurs in a RBM4-dependent manner. Binds to the tau pre-mRNA in the stem-loop region downstream of exon 10. The rate of ATP hydrolysis is highly stimulated by single-stranded RNA. Involved in transcriptional regulation; the function is independent of the RNA…	0	7.138e+07	6.79387e+07	7.23977e+07	1.0091e+08	7.28617e+07	7.63826e+07	6.20413e+07	7.88244e+07	1.10918e+08	1.45642e+08	8.49596e+07	114681260	0.240685	0.648961	0.250049	0.391234	0.705646	1.19113	21	17	21	22	23	19	13	13	26	16	16	23
Guanine nucleotide-binding protein G(I)/G(S)/G(T) subunit beta-2 OS=Homo sapiens OX=9606 GN=GNB2 PE=1 SV=3	GNB2	P62879	37331.8	Cytoplasm, perinuclear region {ECO:0000269|PubMed:16498633}.	Guanine nucleotide-binding proteins (G proteins) are involved as a modulator or transducer in various transmembrane signaling systems. The beta and gamma chains are required for the GTPase activity, for replacement of GDP by GTP, and for G protein-effector interaction.	0	7.81674e+06	1.76838e+07	6.69962e+06	9.28409e+06	8.32332e+06	3.85694e+06	1.1155e+07	1.16699e+07	1.5455e+07	1.62416e+07	1.70148e+07	6.01917e+06	-0.585124	0.389919	0.249519	0.209669	0.286563	0.1804	5	3	4	6	6	2	2	0	4	3	4	2
Rho-related GTP-binding protein RhoG OS=Homo sapiens OX=9606 GN=RHOG PE=1 SV=1	RHOG	P84095	21308.1	Cell membrane {ECO:0000305}; Lipid-anchor {ECO:0000305}; Cytoplasmic side {ECO:0000305}.	Required for the formation of membrane ruffles during macropinocytosis. Plays a role in cell migration and is required for the formation of cup-like structures during trans-endothelial migration of leukocytes. In case of Salmonella enterica infection, activated by SopB and ARHGEF26/SGEF, which induces cytoskeleton rearrangements and promotes bacterial entry. {ECO:0000269|PubMed:15133129, ECO:0000…	0	2.09457e+06	2.27638e+06	988313	2.08365e+06	1.36713e+06	1.9979e+06	1.68328e+06	2.41691e+06	2.27086e+06	1.8509e+06	2.34003e+06	3.06072e+06	0.0238738	0.0215427	0.249495	0.296938	0.436273	0.518331	0	0	2	0	0	0	0	0	0	0	0	0
Cytochrome c-type heme lyase OS=Homo sapiens OX=9606 GN=HCCS PE=1 SV=1	HCCS	P53701	30601.8	Mitochondrion inner membrane {ECO:0000305}. Membrane {ECO:0000305}; Lipid-anchor {ECO:0000305}.	Links covalently the heme group to the apoprotein of cytochrome c. {ECO:0000250}.	0	1.46222e+06	2.45316e+06	1.37627e+06	1.67773e+06	1.37944e+06	1.74565e+06	2.10952e+06	2361194	1.81686e+06	2.56862e+06	2.47132e+06	1.8839e+06	-0.139832	0.16936	0.248787	0.365279	0.387855	0.59921	0	2	2	0	2	2	2	2	0	2	2	0
Kinesin-like protein KIF2A OS=Homo sapiens OX=9606 GN=KIF2A PE=1 SV=3	KIF2A	O00139	79955.6	Cytoplasm {ECO:0000250}. Cytoplasm, cytoskeleton, microtubule organizing center, centrosome. Cytoplasm, cytoskeleton, spindle pole. Cytoplasm, cytoskeleton, spindle. Note=Localized to the spindle microtubules and spindle poles from prophase to metaphase. Efficient targeting to spindle microtubules and spindle poles requires the kinase activity of PLK1. Recruited to mitotic spindles by interaction…	Plus end-directed microtubule-dependent motor required for normal brain development. May regulate microtubule dynamics during axonal growth. Required for normal progression through mitosis. Required for normal congress of chromosomes at the metaphase plate. Required for normal spindle dynamics during mitosis. Promotes spindle turnover. Implicated in formation of bipolar mitotic spindles. Has micr…	0	3.02882e+06	3.64795e+06	2.81724e+06	2.9069e+06	2.56977e+06	3.00992e+06	4.19085e+06	4.41386e+06	2.67546e+06	3.35561e+06	4.21053e+06	3.32333e+06	-0.161833	0.522508	0.248699	0.42317	0.197843	0.535956	0	0	2	0	2	0	0	0	0	0	0	0
Cytochrome b-c1 complex subunit 1, mitochondrial OS=Homo sapiens OX=9606 GN=UQCRC1 PE=1 SV=3	UQCRC1	P31930	52645.9	Mitochondrion inner membrane {ECO:0000250|UniProtKB:P07256}; Peripheral membrane protein {ECO:0000250|UniProtKB:P07256}; Matrix side {ECO:0000250|UniProtKB:P07256}.	Component of the ubiquinol-cytochrome c oxidoreductase, a multisubunit transmembrane complex that is part of the mitochondrial electron transport chain which drives oxidative phosphorylation. The respiratory chain contains 3 multisubunit complexes succinate dehydrogenase (complex II, CII), ubiquinol-cytochrome c oxidoreductase (cytochrome b-c1 complex, complex III, CIII) and cytochrome c oxidase …	0	4.19932e+07	4.24553e+07	3.96043e+07	3.98976e+07	3.02753e+07	2.97313e+07	4.79638e+07	5.18923e+07	4.71293e+07	4.64679e+07	3.71945e+07	3.96188e+07	-0.312338	1.10744	0.244719	1.9525	-0.00900204	0.0296985	11	12	9	10	10	9	12	11	15	8	8	12
Nck-associated protein 1 OS=Homo sapiens OX=9606 GN=NCKAP1 PE=1 SV=1	NCKAP1	Q9Y2A7	128795	Cell membrane {ECO:0000250|UniProtKB:P28660}; Single-pass membrane protein {ECO:0000250|UniProtKB:P28660}; Cytoplasmic side {ECO:0000250|UniProtKB:P28660}. Cell projection, lamellipodium membrane {ECO:0000250|UniProtKB:P28660}; Single-pass membrane protein {ECO:0000250|UniProtKB:P28660}; Cytoplasmic side {ECO:0000250|UniProtKB:P28660}. Note=At the interface between the lamellipodial actin meshwor…	Part of the WAVE complex that regulates lamellipodia formation. The WAVE complex regulates actin filament reorganization via its interaction with the Arp2/3 complex. Actin remodeling activity is regulated by RAC1. As component of the WAVE1 complex, required for BDNF-NTRK2 endocytic trafficking and signaling from early endosomes. {ECO:0000250|UniProtKB:P28660}.	TRANSMEM 995..1015; /note="Helical"; /evidence="ECO:0000255"	2.0073e+06	2.60771e+06	2.4273e+06	3.80921e+06	2.96488e+06	4.94733e+06	2.37981e+06	2.74527e+06	3.21884e+06	3.18189e+06	1.50804e+06	1.99922e+06	0.735026	1.21874	0.244676	0.651766	-0.0742269	0.0786365	0	0	0	3	2	4	0	0	3	0	2	2
Isopentenyl-diphosphate Delta-isomerase 1 OS=Homo sapiens OX=9606 GN=IDI1 PE=1 SV=2	IDI1	Q13907	26320.3	Peroxisome {ECO:0000250|UniProtKB:O35586}.	Catalyzes the 1,3-allylic rearrangement of the homoallylic substrate isopentenyl (IPP) to its highly electrophilic allylic isomer, dimethylallyl diphosphate (DMAPP). {ECO:0000269|PubMed:8806705}.	0	2.96417e+06	4.09293e+06	3.84388e+06	4.34179e+06	3.38873e+06	5.42464e+06	4.4334e+06	5.36802e+06	3.09612e+06	3.79578e+06	3.37409e+06	5.3648e+06	0.27117	0.479542	0.242636	0.375757	0.201463	0.320993	0	0	0	3	0	0	0	0	2	0	0	0
Acetyl-CoA acetyltransferase, cytosolic OS=Homo sapiens OX=9606 GN=ACAT2 PE=1 SV=2	ACAT2	Q9BWD1	41350.4	Cytoplasm, cytosol {ECO:0000305|PubMed:7911016}.	Involved in the biosynthetic pathway of cholesterol. {ECO:0000303|PubMed:15733928}.	0	4.71153e+06	4.2151e+06	3.43675e+06	3.83553e+06	5.154e+06	3.56891e+06	4.82366e+06	5.46568e+06	4.33155e+06	7.39901e+06	4.72229e+06	5.84758e+06	0.0225829	0.0358135	0.241957	0.691643	0.539427	1.01978	0	0	0	0	0	0	0	0	3	0	0	0
Polyubiquitin-B OS=Homo sapiens OX=9606 GN=UBB PE=1 SV=1	UBB	P0CG47,P0CG48	25762.8	#N/A	#N/A	#N/A	1.27549e+07	3.07971e+07	2.05338e+07	2.06594e+07	2.24956e+07	1.07855e+07	3.08653e+07	2.767e+07	1.72429e+07	5.82253e+07	4.98388e+07	3.38615e+07	-0.248631	0.205252	0.241781	0.229693	1.14706	1.36886	3	3	3	3	3	3	3	3	3	3	3	3
Mitochondrial chaperone BCS1 OS=Homo sapiens OX=9606 GN=BCS1L PE=1 SV=1	BCS1L	Q9Y276	47535.3	Mitochondrion inner membrane {ECO:0000269|PubMed:18628306, ECO:0000269|PubMed:9878253}; Single-pass membrane protein {ECO:0000269|PubMed:18628306, ECO:0000269|PubMed:9878253}.	Chaperone necessary for the assembly of mitochondrial respiratory chain complex III. Plays an important role in the maintenance of mitochondrial tubular networks, respiratory chain assembly and formation of the LETM1 complex. {ECO:0000269|PubMed:18628306}.	TRANSMEM 16..32; /note="Helical"; /evidence="ECO:0000255"	3.22364e+06	2.96825e+06	2.35957e+06	1.531e+06	2.91925e+06	2.23497e+06	2.83434e+06	2.96532e+06	4.30949e+06	2.33194e+06	4.46532e+06	2.364e+06	-0.355197	0.58324	0.24142	0.411168	0.0993745	0.096895	0	0	0	0	2	2	0	0	0	0	2	0
Polymerase delta-interacting protein 3 OS=Homo sapiens OX=9606 GN=POLDIP3 PE=1 SV=2	POLDIP3	Q9BY77	46090.3	Nucleus. Nucleus speckle. Cytoplasm. Note=Nucleocytoplasmic shuttling protein.	Is involved in regulation of translation. Is preferentially associated with CBC-bound spliced mRNA-protein complexes during the pioneer round of mRNA translation. Contributes to enhanced translational efficiency of spliced over nonspliced mRNAs. Recruits activated ribosomal protein S6 kinase beta-1 I/RPS6KB1 to newly synthesized mRNA. Involved in nuclear mRNA export; probably mediated by associat…	0	2.08716e+06	2.59914e+06	2.69241e+06	3.41795e+06	4.48843e+06	2.28656e+06	3.27015e+06	3.23821e+06	2.20773e+06	3.86993e+06	1.91412e+06	2.14626e+06	0.46613	0.638288	0.240312	0.489846	0.10401	0.102523	0	0	0	0	0	2	0	0	0	0	0	0
Guanine nucleotide-binding protein G(I)/G(S)/G(T) subunit beta-1 OS=Homo sapiens OX=9606 GN=GNB1 PE=1 SV=3	GNB1	P62873	37377.5	0	Guanine nucleotide-binding proteins (G proteins) are involved as a modulator or transducer in various transmembrane signaling systems. The beta and gamma chains are required for the GTPase activity, for replacement of GDP by GTP, and for G protein-effector interaction.	0	9.09214e+06	2.07155e+07	1.10692e+07	1.03109e+07	1.27938e+07	7.29992e+06	1.54425e+07	1.45092e+07	1.8273e+07	1.37371e+07	2.04138e+07	1.68619e+07	-0.426991	0.372431	0.238489	0.259016	0.319578	0.343204	5	5	7	6	8	3	4	3	6	0	5	6
Mannose-1-phosphate guanyltransferase alpha OS=Homo sapiens OX=9606 GN=GMPPA PE=1 SV=1	GMPPA	Q96IJ6	46291.8	Cytoplasm {ECO:0000269|PubMed:24035193}. Note=Myc-tagged GMPPA shows a diffuse cytoplasmic and nuclear pattern in transfected COS-7 cells.	May serve as a regulatory subunit and allow allosteric feedback inhibition of GMPPB by GDP-mannose. {ECO:0000269|PubMed:24035193}.	0	3.36566e+06	2.18075e+06	2.35623e+06	1.91295e+06	4.3038e+06	1.97283e+06	3.81866e+06	2.88698e+06	2.61704e+06	6.91626e+06	2.64764e+06	3.21652e+06	0.0514558	0.0372994	0.23841	0.384148	0.693529	0.513568	0	0	0	2	0	0	0	0	0	0	0	0
C-terminal-binding protein 2 OS=Homo sapiens OX=9606 GN=CTBP2 PE=1 SV=1	CTBP2	P56545	48945.1	Nucleus {ECO:0000305}. Cell junction, synapse {ECO:0000250}.	Corepressor targeting diverse transcription regulators. Functions in brown adipose tissue (BAT) differentiation (By similarity). {ECO:0000250}.; Isoform 2 probably acts as a scaffold for specialized synapses.	0	1.08313e+07	1.01689e+07	1.06644e+07	1.00345e+07	8.77448e+06	1.11171e+07	1.19845e+07	1.14594e+07	1.39089e+07	2.53012e+07	1.1877e+07	1.27894e+07	-0.0814707	0.339568	0.238337	1.15689	0.658119	0.634348	6	4	6	5	5	5	5	4	6	5	6	7
Short/branched chain specific acyl-CoA dehydrogenase, mitochondrial OS=Homo sapiens OX=9606 GN=ACADSB PE=1 SV=1	ACADSB	P45954	47487.1	Mitochondrion matrix.	Has greatest activity toward short branched chain acyl-CoA derivative such as (s)-2-methylbutyryl-CoA, isobutyryl-CoA, and 2-methylhexanoyl-CoA as well as toward short straight chain acyl-CoAs such as butyryl-CoA and hexanoyl-CoA. Can use valproyl-CoA as substrate and may play a role in controlling the metabolic flux of valproic acid in the development of toxicity of this agent.	0	1.99974e+06	1.92488e+06	2.40203e+06	2.808e+06	1.52213e+06	1.75533e+06	2.4054e+06	2.6986e+06	2.35433e+06	2.53186e+06	2.05915e+06	3.49149e+06	-0.056077	0.0663599	0.237411	0.965932	0.353359	0.584611	0	0	0	0	2	0	0	3	0	0	0	0
FAST kinase domain-containing protein 4 OS=Homo sapiens OX=9606 GN=TBRG4 PE=1 SV=1	TBRG4	Q969Z0	70739.8	Mitochondrion matrix {ECO:0000269|PubMed:20869947, ECO:0000269|PubMed:28335001}.	Plays a role in processing of mitochondrial RNA precursors and in stabilization of a subset of mature mitochondrial RNA species, such as MT-CO1, MT-CO2, MT-CYB, MT-CO3, MT-ND3, MT-ND5 and MT-ATP8/6. May play a role in cell cycle progression (PubMed:9383053). {ECO:0000269|PubMed:28335001, ECO:0000269|PubMed:9383053}.	0	2.09078e+06	5.05763e+06	2.13934e+06	2.68853e+06	1.9972e+06	3.6921e+06	1.47803e+06	2.53585e+06	6.93258e+06	3.23434e+06	2.26548e+06	2.5182e+06	-0.148751	0.0991123	0.237063	0.102671	-0.212084	0.154725	3	4	3	3	3	3	2	0	4	0	2	0
decoy_sp|Q15878|CAC1E_HUMAN	#VALUE!	decoy_sp|Q15878|CAC1E_HUMAN	0	#N/A	#N/A	#N/A	2.77441e+06	2.62865e+06	3.75372e+06	3.20898e+06	2.05046e+06	1.7594e+06	4.00305e+06	4.35077e+06	2.43509e+06	4.46254e+06	3.62099e+06	2.81838e+06	-0.383607	0.557923	0.236636	0.325392	0.251667	0.418842	0	0	0	0	2	0	0	0	0	0	0	0
Leucine-rich PPR motif-containing protein, mitochondrial OS=Homo sapiens OX=9606 GN=LRPPRC PE=1 SV=3	LRPPRC	P42704	157912	Mitochondrion. Nucleus, nucleoplasm. Nucleus inner membrane. Nucleus outer membrane. Note=Seems to be predominantly mitochondrial.	May play a role in RNA metabolism in both nuclei and mitochondria. In the nucleus binds to HNRPA1-associated poly(A) mRNAs and is part of nmRNP complexes at late stages of mRNA maturation which are possibly associated with nuclear mRNA export. May bind mature mRNA in the nucleus outer membrane. In mitochondria binds to poly(A) mRNA. Plays a role in translation or stability of mitochondrially enco…	0	1.0617e+08	1.45371e+08	1.14275e+08	1.04444e+08	1.25011e+08	1.53266e+08	1.58319e+08	1.66139e+08	1.06492e+08	1.43704e+08	1.3484e+08	8.73245e+07	0.065176	0.11008	0.236401	0.416196	0.000208805	0.000271351	49	48	53	49	57	56	52	49	54	36	41	38
NADH dehydrogenase [ubiquinone] 1 alpha subcomplex subunit 13 OS=Homo sapiens OX=9606 GN=NDUFA13 PE=1 SV=3	NDUFA13	Q9P0J0	16699.1	Mitochondrion inner membrane {ECO:0000269|PubMed:12628925, ECO:0000269|PubMed:15059901, ECO:0000269|PubMed:15367666}; Single-pass membrane protein {ECO:0000255}; Matrix side. Nucleus {ECO:0000269|PubMed:12628925}. Note=Localizes mainly in the mitochondrion (PubMed:12628925). May be translocated into the nucleus upon IFN/RA treatment. {ECO:0000269|PubMed:12628925, ECO:0000269|PubMed:15059901}.	Accessory subunit of the mitochondrial membrane respiratory chain NADH dehydrogenase (Complex I), that is believed not to be involved in catalysis (PubMed:27626371). Complex I functions in the transfer of electrons from NADH to the respiratory chain. The immediate electron acceptor for the enzyme is believed to be ubiquinone (PubMed:27626371). Involved in the interferon/all-trans-retinoic acid (I…	TRANSMEM 30..51; /note="Helical"; /evidence="ECO:0000255"	3.25168e+06	2.68866e+06	3.32794e+06	2.67852e+06	3.41062e+06	3.92297e+06	3.92463e+06	2.89054e+06	4.10014e+06	2.79435e+06	2.80294e+06	3.0877e+06	0.111374	0.235732	0.23598	0.570712	-0.0937767	0.363181	0	0	2	0	0	2	0	0	2	0	0	0
OS=Homo sapiens OX=9606 GN=POU2F1-GFP PE=2 SV=1	POU2F1-GFP	BMSR03	105005	#N/A	#N/A	#N/A	7.28236e+07	7.94169e+07	7.47962e+07	1.22687e+08	1.47885e+08	1.08153e+08	8.63606e+07	8.77992e+07	9.32124e+07	7.71962e+07	8.32345e+07	9.46951e+07	0.738224	1.8967	0.235923	2.0325	0.168283	0.78683	0	0	0	33	35	35	0	0	0	0	0	0
U4/U6 small nuclear ribonucleoprotein Prp31 OS=Homo sapiens OX=9606 GN=PRPF31 PE=1 SV=2	PRPF31	Q8WWY3	55457.4	Nucleus {ECO:0000269|PubMed:12444105, ECO:0000269|PubMed:26912367, ECO:0000269|PubMed:28781166}. Nucleus speckle {ECO:0000269|PubMed:11867543}. Nucleus, Cajal body {ECO:0000269|PubMed:11867543}. Note=Predominantly found in speckles and in Cajal bodies. {ECO:0000269|PubMed:11867543}.	Involved in pre-mRNA splicing as component of the spliceosome (PubMed:11867543, PubMed:28781166). Required for the assembly of the U4/U5/U6 tri-snRNP complex, one of the building blocks of the spliceosome (PubMed:11867543). {ECO:0000269|PubMed:11867543, ECO:0000269|PubMed:28781166}.	0	1.70357e+06	2.832e+06	3.20941e+06	2.62579e+06	3.83705e+06	3.88349e+06	2.76632e+06	3.02891e+06	3.3186e+06	2.99911e+06	2.54908e+06	2.51824e+06	0.417787	0.639652	0.234798	0.403042	0.0586702	0.0789816	2	0	4	0	4	4	2	2	3	2	2	2
NADH-cytochrome b5 reductase 1 OS=Homo sapiens OX=9606 GN=CYB5R1 PE=1 SV=1	CYB5R1	Q9UHQ9	34096.1	Membrane {ECO:0000305}; Single-pass membrane protein {ECO:0000305}.	NADH-cytochrome b5 reductases are involved in desaturation and elongation of fatty acids, cholesterol biosynthesis, drug metabolism, and, in erythrocyte, methemoglobin reduction. {ECO:0000250}.	TRANSMEM 8..28; /note="Helical"; /evidence="ECO:0000255"	2.70528e+06	4.15571e+06	2.30909e+06	2.90847e+06	3.30248e+06	2.59241e+06	3.30998e+06	3.8763e+06	3.6033e+06	3.2342e+06	3.04528e+06	3.61386e+06	-0.0588794	0.0716392	0.234634	0.389277	0.109526	0.153855	0	3	2	0	2	2	0	2	0	0	0	0
STE20/SPS1-related proline-alanine-rich protein kinase OS=Homo sapiens OX=9606 GN=STK39 PE=1 SV=3	STK39	Q9UEW8	59474.7	Cytoplasm {ECO:0000305}. Nucleus {ECO:0000305}. Note=Nucleus when caspase-cleaved. {ECO:0000305}.	May act as a mediator of stress-activated signals. Mediates the inhibition of SLC4A4, SLC26A6 as well as CFTR activities by the WNK scaffolds, probably through phosphorylation. Phosphorylates RELT. {ECO:0000250|UniProtKB:Q9Z1W9}.	0	2.51043e+06	2.65973e+06	2.427e+06	2.73952e+06	2.06019e+06	3.06277e+06	3.28049e+06	3.40703e+06	2.25083e+06	3.22281e+06	3.36512e+06	3.52539e+06	0.0495246	0.105124	0.234548	0.528425	0.412724	2.78735	2	0	0	0	0	0	0	0	0	0	0	0
Ryanodine receptor 3 OS=Homo sapiens OX=9606 GN=RYR3 PE=1 SV=3	RYR3	Q15413	552044	Sarcoplasmic reticulum membrane {ECO:0000305}; Multi-pass membrane protein {ECO:0000305}. Membrane {ECO:0000305}; Multi-pass membrane protein {ECO:0000305}. Microsome membrane {ECO:0000250}; Multi-pass membrane protein {ECO:0000250}. Sarcoplasmic reticulum {ECO:0000250|UniProtKB:Q9TS33}. Note=The number of predicted transmembrane domains varies between orthologs, but both N-terminus and C-terminu…	Calcium channel that mediates the release of Ca(2+) from the sarcoplasmic reticulum into the cytoplasm in muscle and thereby plays a role in triggering muscle contraction. May regulate Ca(2+) release by other calcium channels. Calcium channel that mediates Ca(2+)-induced Ca(2+) release from the endoplasmic reticulum in non-muscle cells. Contributes to cellular calcium ion homeostasis (By similari…	TRANSMEM 4187..4207; /note="Helical"; /evidence="ECO:0000255"; TRANSMEM 4410..4430; /note="Helical"; /evidence="ECO:0000255"; TRANSMEM 4485..4505; /note="Helical"; /evidence="ECO:0000255"; TRANSMEM 4610..4630; /note="Helical"; /evidence="ECO:0000255"; TRANSMEM 4633..4653; /note="Helical"; /evidence="ECO:0000255"; TRANSMEM 4672..4692; /note="Helical"; /evidence="ECO:0000255"; TRANSMEM 4753..4773; …	9.074e+06	1.18365e+07	1.16141e+07	9.63933e+06	1.07506e+07	7.05142e+06	1.62038e+07	1.35051e+07	8.54898e+06	1.40255e+07	1.17681e+07	7.54702e+06	-0.245179	0.529382	0.234232	0.325858	0.0357526	0.0443293	0	0	0	0	0	0	0	0	0	0	0	0
Hydroxysteroid dehydrogenase-like protein 2 OS=Homo sapiens OX=9606 GN=HSDL2 PE=1 SV=1	HSDL2	Q6YN16	45396.6	Peroxisome {ECO:0000269|PubMed:19703561}.	Has apparently no steroid dehydrogenase activity. {ECO:0000269|PubMed:19703561}.	0	5.53336e+06	1.00886e+07	6.14402e+06	6.55559e+06	1.18159e+07	1.02277e+07	6.20242e+06	1.03669e+07	9.02951e+06	1.05975e+07	8.06684e+06	5.37412e+06	0.393901	0.466349	0.234002	0.271944	0.143268	0.134452	2	3	2	3	5	4	2	3	3	0	0	2
Nuclear pore complex protein Nup93 OS=Homo sapiens OX=9606 GN=NUP93 PE=1 SV=2	NUP93	Q8N1F7	93491.2	Nucleus membrane {ECO:0000250|UniProtKB:Q66HC5}; Peripheral membrane protein {ECO:0000250|UniProtKB:Q66HC5}. Nucleus, nuclear pore complex {ECO:0000269|PubMed:12802065, ECO:0000269|PubMed:15229283, ECO:0000269|PubMed:9348540}. Nucleus envelope {ECO:0000269|PubMed:26878725, ECO:0000269|PubMed:9348540}. Note=Localizes at the nuclear basket and at or near the nuclear entry to the gated channel of th…	Plays a role in the nuclear pore complex (NPC) assembly and/or maintenance (PubMed:9348540). May anchor nucleoporins, but not NUP153 and TPR, to the NPC. During renal development, regulates podocyte migration and proliferation through SMAD4 signaling (PubMed:26878725). {ECO:0000269|PubMed:15229283, ECO:0000269|PubMed:15703211, ECO:0000269|PubMed:26878725, ECO:0000269|PubMed:9348540}.	0	4.81096e+06	2.49791e+06	5.97086e+06	2.80054e+06	9.68633e+06	9.70802e+06	6.05453e+06	3.55692e+06	6.0022e+06	4.25102e+06	3.43027e+06	5.83227e+06	0.741002	0.518742	0.233581	0.232797	0.0251814	0.0209449	0	2	6	2	8	6	0	3	6	0	2	0
Serine/arginine-rich splicing factor 3 OS=Homo sapiens OX=9606 GN=SRSF3 PE=1 SV=1	SRSF3	P84103	19330	Nucleus {ECO:0000269|PubMed:11336712}. Nucleus speckle {ECO:0000269|PubMed:26876937}. Cytoplasm {ECO:0000269|PubMed:11336712}. Note=Recruited to nuclear speckles following interaction with YTHDC1. {ECO:0000269|PubMed:26876937}.	Splicing factor that specifically promotes exon-inclusion during alternative splicing (PubMed:26876937). Interaction with YTHDC1, a RNA-binding protein that recognizes and binds N6-methyladenosine (m6A)-containing RNAs, promotes recruitment of SRSF3 to its mRNA-binding elements adjacent to m6A sites, leading to exon-inclusion during alternative splicing (PubMed:26876937). Also functions as export…	0	1.78039e+07	2.18715e+07	1.88805e+07	1.75893e+07	2.00454e+07	2.5369e+07	2.90112e+07	2.74372e+07	1.23832e+07	3.45274e+07	1.99093e+07	2.20085e+07	0.10562	0.22269	0.233255	0.249528	0.384612	0.560182	7	8	8	7	7	7	7	6	7	6	6	6
Glutathione peroxidase 1 OS=Homo sapiens OX=9606 GN=GPX1 PE=1 SV=4	GPX1	P07203	22088.6	Cytoplasm.	Protects the hemoglobin in erythrocytes from oxidative breakdown. In platelets, plays a crucial role of glutathione peroxidase in the arachidonic acid metabolism (PubMed:11115402). {ECO:0000269|PubMed:11115402}.	0	1.35364e+07	2.41511e+07	1.99498e+07	2.14749e+07	2.0429e+07	8.83808e+06	2.41386e+07	2.53996e+07	1.8207e+07	1.8852e+07	1.67765e+07	2.0187e+07	-0.183824	0.170656	0.233115	0.371213	-0.0463385	0.0652374	4	5	5	6	6	3	5	4	6	3	4	5
Acyl-protein thioesterase 1 OS=Homo sapiens OX=9606 GN=LYPLA1 PE=1 SV=1	LYPLA1	O75608	24670.2	Cytoplasm {ECO:0000269|PubMed:19439193}. Cell membrane {ECO:0000269|PubMed:19439193}. Nucleus membrane {ECO:0000269|PubMed:19439193}. Endoplasmic reticulum {ECO:0000269|PubMed:19439193}. Note=Shows predominantly a cytoplasmic localization with a weak expression in the cell membrane, nuclear membrane and endoplasmic reticulum. {ECO:0000269|PubMed:19439193}.	Acts as a acyl-protein thioesterase (PubMed:19439193, PubMed:20418879). Hydrolyzes fatty acids from S-acylated cysteine residues in proteins such as trimeric G alpha proteins or HRAS (PubMed:20418879). Has depalmitoylating activity toward KCNMA1 (PubMed:22399288). Could also depalmitoylate ADRB2 (PubMed:27481942). Acts as a lysophospholipase and hydrolyzes lysophosphatidylcholine (lyso-PC) (PubMe…	0	2.38056e+06	2.67142e+06	3.1624e+06	2.93223e+06	2.0779e+06	1.50007e+06	3.31678e+06	3.31738e+06	3.00909e+06	2.98502e+06	3.15865e+06	2.88661e+06	-0.33545	0.526823	0.231369	0.88715	0.136621	0.490421	2	2	2	2	2	2	2	2	2	0	2	2
RNA-binding protein Raly OS=Homo sapiens OX=9606 GN=RALY PE=1 SV=1	RALY	Q9UKM9	32463.9	Nucleus {ECO:0000250|UniProtKB:Q64012}.	RNA-binding protein that acts as a transcriptional cofactor for cholesterol biosynthetic genes in the liver. Binds the lipid-responsive non-coding RNA LeXis and is required for LeXis-mediated effect on cholesterogenesis (By similarity). May be a heterogeneous nuclear ribonucleoprotein (hnRNP) (PubMed:9376072). {ECO:0000250|UniProtKB:Q64012, ECO:0000269|PubMed:9376072}.	0	4.5786e+06	3.9959e+06	3.50841e+06	4.66198e+06	4.02538e+06	3.99848e+06	4.14238e+06	4.86409e+06	5.17703e+06	5.03386e+06	5.06531e+06	4.35769e+06	0.0702508	0.205585	0.231245	0.73742	0.258786	0.959948	2	0	0	1	0	0	0	0	0	0	0	1
Nucleosome assembly protein 1-like 1 OS=Homo sapiens OX=9606 GN=NAP1L1 PE=1 SV=1	NAP1L1	P55209	45375	Nucleus {ECO:0000269|PubMed:17081065}. Melanosome {ECO:0000269|PubMed:17081065}. Cytoplasm {ECO:0000250|UniProtKB:P28656}. Note=Identified by mass spectrometry in melanosome fractions from stage I to stage IV.	Plays a key role in the regulation of embryonic neurogenesis (By similarity). Promotes the proliferation of neural progenitors and inhibits neuronal differentiation during cortical development (By similarity). Regulates neurogenesis via the modulation of RASSF10; regulates RASSF10 expression by promoting SETD1A-mediated H3K4 methylation at the RASSF10 promoter (By similarity). {ECO:0000250|UniPro…	0	5.22581e+06	1.15612e+07	9.43845e+06	1.82062e+07	1.2598e+07	1.70142e+07	1.11138e+07	6.8689e+06	1.27885e+07	1.21155e+07	6.21013e+06	1.07304e+07	0.866598	1.33374	0.230616	0.23196	0.147869	0.134961	2	4	4	6	6	5	5	3	6	0	2	4
14-3-3 protein gamma OS=Homo sapiens OX=9606 GN=YWHAG PE=1 SV=2	YWHAG	P61981	28303.1	Cytoplasm {ECO:0000250}.	Adapter protein implicated in the regulation of a large spectrum of both general and specialized signaling pathways. Binds to a large number of partners, usually by recognition of a phosphoserine or phosphothreonine motif. Binding generally results in the modulation of the activity of the binding partner. {ECO:0000269|PubMed:16511572}.	0	2.01253e+06	3.09707e+06	2.1452e+06	2.32499e+06	2.03662e+06	2.82269e+06	3.35342e+06	3.36058e+06	1.79432e+06	2.52323e+06	3.15632e+06	3.96674e+06	-0.0140894	0.0189977	0.229937	0.26834	0.411037	0.670287	2	0	0	0	0	0	0	0	0	0	0	0
Alpha-actinin-4 OS=Homo sapiens OX=9606 GN=ACTN4 PE=1 SV=2	ACTN4	O43707	104857	Nucleus {ECO:0000269|PubMed:22351778, ECO:0000269|PubMed:9508771}. Cytoplasm {ECO:0000269|PubMed:22351778, ECO:0000269|PubMed:9508771}. Cell junction {ECO:0000250|UniProtKB:P57780}. Cytoplasm, cytoskeleton, stress fiber {ECO:0000269|PubMed:9508771}. Note=Localized in cytoplasmic mRNP granules containing untranslated mRNAs. Nuclear translocation can be induced by the PI3 kinase inhibitor wortmanni…	F-actin cross-linking protein which is thought to anchor actin to a variety of intracellular structures. This is a bundling protein (Probable). Probably involved in vesicular trafficking via its association with the CART complex. The CART complex is necessary for efficient transferrin receptor recycling but not for EGFR degradation (PubMed:15772161). Involved in tight junction assembly in epithel…	0	5.41408e+06	5.68697e+06	1.06542e+07	1.5409e+07	1.53841e+07	1.9769e+07	4.42543e+06	5.07913e+06	1.59915e+07	8.66893e+06	5.22637e+06	1.56763e+07	1.21669	1.89245	0.228907	0.109453	0.442848	0.301309	3	3	5	7	10	11	2	2	9	0	2	8
Calumenin OS=Homo sapiens OX=9606 GN=CALU PE=1 SV=2	CALU	O43852	37107.7	Endoplasmic reticulum membrane {ECO:0000269|PubMed:10222138}. Golgi apparatus {ECO:0000269|PubMed:10222138}. Secreted {ECO:0000305}. Melanosome {ECO:0000269|PubMed:12643545}. Sarcoplasmic reticulum lumen {ECO:0000305}. Note=Identified by mass spectrometry in melanosome fractions from stage I to stage IV. {ECO:0000269|PubMed:12643545}.	Involved in regulation of vitamin K-dependent carboxylation of multiple N-terminal glutamate residues. Seems to inhibit gamma-carboxylase GGCX. Binds 7 calcium ions with a low affinity (By similarity). {ECO:0000250}.	0	2.5893e+06	3.26748e+06	2.97392e+06	3.93266e+06	4.22409e+06	4.65537e+06	3.58788e+06	4.20072e+06	2.54845e+06	2.64638e+06	2.76021e+06	3.50006e+06	0.536909	2.0042	0.227224	0.409508	0.0123549	0.02555	0	0	0	0	4	0	0	0	0	0	2	0
39S ribosomal protein L24, mitochondrial OS=Homo sapiens OX=9606 GN=MRPL24 PE=1 SV=1	MRPL24	Q96A35	24915	Mitochondrion {ECO:0000269|PubMed:25278503, ECO:0000269|PubMed:25838379, ECO:0000269|PubMed:28892042}.	0	0	2.18035e+06	3.91426e+06	4.02232e+06	4.09571e+06	2.15954e+06	3.16056e+06	3.75599e+06	4.08801e+06	3.98364e+06	3.92195e+06	1.65795e+06	2.54853e+06	-0.103615	0.102802	0.22539	0.398876	-0.315724	0.303467	0	0	0	0	2	0	0	0	0	0	0	0
Protein arginine N-methyltransferase 1 OS=Homo sapiens OX=9606 GN=PRMT1 PE=1 SV=3	PRMT1	Q99873	42462.2	Nucleus {ECO:0000269|PubMed:10749851, ECO:0000269|PubMed:11387442, ECO:0000269|PubMed:16879614}. Nucleus, nucleoplasm {ECO:0000250|UniProtKB:Q9JIF0}. Cytoplasm {ECO:0000269|PubMed:26876602}. Cytoplasm, cytosol {ECO:0000250|UniProtKB:Q9JIF0}. Note=Mostly found in the cytoplasm. Colocalizes with CHTOP within the nucleus. Low levels detected also in the chromatin fraction (By similarity). {ECO:00002…	Arginine methyltransferase that methylates (mono and asymmetric dimethylation) the guanidino nitrogens of arginyl residues present in proteins such as ESR1, histone H2, H3 and H4, ILF3, HNRNPA1, HNRNPD, NFATC2IP, SUPT5H, TAF15, EWS, HABP4 and SERBP1 (PubMed:10749851, PubMed:16879614, PubMed:26876602). Constitutes the main enzyme that mediates monomethylation and asymmetric dimethylation of histon…	0	4.26822e+06	7.41696e+06	4.75593e+06	6.47541e+06	6.80266e+06	1.07809e+07	6.19521e+06	6.88798e+06	6.12771e+06	1.06153e+07	9.21019e+06	1.36396e+07	0.549267	0.681041	0.224618	0.385521	1.02535	1.59439	4	5	4	6	5	6	4	5	5	5	4	8
Pinin OS=Homo sapiens OX=9606 GN=PNN PE=1 SV=5	PNN	Q9H307	81627.3	Nucleus speckle. Cell junction, desmosome. Note=Cell-cell contact area, predominantly desmosome of intercellular adherens junction. Not a nucleocytoplasmic shuttling protein.	Transcriptional activator binding to the E-box 1 core sequence of the E-cadherin promoter gene; the core-binding sequence is 5'CAGGTG-3'. Capable of reversing CTBP1-mediated transcription repression. Auxiliary component of the splicing-dependent multiprotein exon junction complex (EJC) deposited at splice junction on mRNAs. The EJC is a dynamic structure consisting of core proteins and several pe…	0	9.32937e+06	7.52018e+06	6.12017e+06	1.22114e+07	7.45161e+06	7.83745e+06	9.70233e+06	1.10837e+07	6.0199e+06	8.82131e+06	1.00179e+07	6.54226e+06	0.259725	0.351075	0.222819	0.29168	0.144043	0.228235	0	0	0	0	0	0	0	0	0	0	0	2
Hypoxanthine-guanine phosphoribosyltransferase OS=Homo sapiens OX=9606 GN=HPRT1 PE=1 SV=2	HPRT1	P00492	24580.2	Cytoplasm.	Converts guanine to guanosine monophosphate, and hypoxanthine to inosine monophosphate. Transfers the 5-phosphoribosyl group from 5-phosphoribosylpyrophosphate onto the purine. Plays a central role in the generation of purine nucleotides through the purine salvage pathway.	0	3.44817e+06	3.97963e+06	3.43552e+06	4.15025e+06	2.14208e+06	3.612e+06	6.25828e+06	2.57193e+06	3.82912e+06	9.59361e+06	4.76425e+06	5.31925e+06	-0.133334	0.196082	0.220735	0.211717	0.857053	0.891487	2	3	2	0	2	0	3	2	0	3	2	3
Chitobiosyldiphosphodolichol beta-mannosyltransferase OS=Homo sapiens OX=9606 GN=ALG1 PE=1 SV=2	ALG1	Q9BT22	52518.7	Endoplasmic reticulum membrane {ECO:0000305}; Single-pass type II membrane protein {ECO:0000305}.	Participates in the formation of the lipid-linked precursor oligosaccharide for N-glycosylation. Involved in assembling the dolichol-pyrophosphate-GlcNAc(2)-Man(5) intermediate on the cytoplasmic surface of the ER. {ECO:0000269|PubMed:10704531, ECO:0000269|PubMed:26931382}.	TRANSMEM 3..23; /note="Helical; Signal-anchor for type II membrane protein"; /evidence="ECO:0000255"	1.01749e+06	3.4486e+06	2.23444e+06	2.21933e+06	2.17453e+06	2.67342e+06	2.30392e+06	3.6861e+06	1.81779e+06	3.46218e+06	2.39758e+06	3.39175e+06	0.0768819	0.0588096	0.220647	0.153662	0.465415	0.471456	2	3	0	0	0	0	0	0	0	0	0	0
Mini-chromosome maintenance complex-binding protein OS=Homo sapiens OX=9606 GN=MCMBP PE=1 SV=2	MCMBP	Q9BTE3	72981.3	Nucleus {ECO:0000269|PubMed:17296731}. Note=Associates with chromatin. Highly associated with chromatin in G1/S and S phases, reduced binding to chromatin in G2, and further decreased binding in early M phase. It then reassociates with chromatin in late M phase. Dissociates from chromatin later than component of the MCM complex.	Associated component of the MCM complex that acts as a regulator of DNA replication. Binds to the MCM complex during late S phase and promotes the disassembly of the MCM complex from chromatin, thereby acting as a key regulator of pre-replication complex (pre-RC) unloading from replicated DNA. Can dissociate the MCM complex without addition of ATP; probably acts by destabilizing interactions of e…	0	1.80454e+06	1.3525e+06	1.63264e+06	2.70214e+06	2.01605e+06	1.81876e+06	1.75628e+06	1.60712e+06	2.21631e+06	1.41377e+06	2.00848e+06	2.96266e+06	0.448687	0.911276	0.220257	0.511143	0.414734	0.493355	0	2	0	2	0	0	0	0	3	0	0	0
Probable ATP-dependent RNA helicase DDX41 OS=Homo sapiens OX=9606 GN=DDX41 PE=1 SV=2	DDX41	Q9UJV9	69839.7	Nucleus {ECO:0000269|PubMed:26712909}.	Probable ATP-dependent RNA helicase. Is required during post-transcriptional gene expression. May be involved in pre-mRNA splicing. {ECO:0000269|PubMed:25920683}.	0	1.76745e+06	1.6925e+06	2.4732e+06	2.14979e+06	1.40607e+06	2.61039e+06	2.4973e+06	2.61988e+06	1.79274e+06	1.97216e+06	2.49254e+06	3.45237e+06	0.055594	0.0627802	0.21987	0.382247	0.416167	0.591167	0	0	0	0	2	0	0	0	0	0	0	0
Importin-5 OS=Homo sapiens OX=9606 GN=IPO5 PE=1 SV=4	IPO5	O00410	123632	Cytoplasm. Nucleus. Nucleus, nucleolus. Note=Nucleus; nuclear rim. Found particularly in the nuclear rim and nucleolus.	Functions in nuclear protein import as nuclear transport receptor. Serves as receptor for nuclear localization signals (NLS) in cargo substrates. Is thought to mediate docking of the importin/substrate complex to the nuclear pore complex (NPC) through binding to nucleoporin and the complex is subsequently translocated through the pore by an energy requiring, Ran-dependent mechanism. At the nucleo…	0	3.49005e+07	2.94759e+07	2.58765e+07	2.63659e+07	2.02955e+07	3.30998e+07	4.57845e+07	3.53429e+07	2.39668e+07	2.53811e+07	2.16249e+07	2.87488e+07	-0.178284	0.315593	0.219639	0.293597	-0.252635	0.656139	19	18	17	20	19	21	19	17	17	12	14	16
Activator of 90 kDa heat shock protein ATPase homolog 1 OS=Homo sapiens OX=9606 GN=AHSA1 PE=1 SV=1	AHSA1	O95433	38274.4	Cytoplasm, cytosol {ECO:0000269|PubMed:11554768}. Endoplasmic reticulum {ECO:0000269|PubMed:11554768}. Note=May transiently interact with the endoplasmic reticulum.	Acts as a co-chaperone of HSP90AA1 (PubMed:29127155). Activates the ATPase activity of HSP90AA1 leading to increase in its chaperone activity (PubMed:29127155). Competes with the inhibitory co-chaperone FNIP1 for binding to HSP90AA1, thereby providing a reciprocal regulatory mechanism for chaperoning of client proteins (PubMed:27353360). Competes with the inhibitory co-chaperone TSC1 for binding …	0	1.18874e+07	6.35044e+06	6.13931e+06	1.02561e+07	1.11829e+07	9.52455e+06	7.34834e+06	9.33481e+06	1.16859e+07	6.84165e+06	2.877e+06	1.59914e+06	0.345044	0.492882	0.218789	0.230746	-1.10693	0.820985	4	2	4	6	5	5	0	3	4	0	3	2
Annexin A6 OS=Homo sapiens OX=9606 GN=ANXA6 PE=1 SV=3	ANXA6	P08133	75877.5	Cytoplasm {ECO:0000250}. Melanosome {ECO:0000269|PubMed:17081065}. Note=Identified by mass spectrometry in melanosome fractions from stage I to stage IV.	May associate with CD21. May regulate the release of Ca(2+) from intracellular stores.	0	1.44714e+06	1.41566e+06	1.53246e+06	2.13485e+06	2.22564e+06	1.72689e+06	1.91887e+06	1.9178e+06	1.27699e+06	2.36596e+06	1.37339e+06	3.35043e+06	0.469872	1.63741	0.218408	0.48024	0.689793	0.718244	0	2	0	0	0	0	2	0	2	0	0	0
DnaJ homolog subfamily C member 11 OS=Homo sapiens OX=9606 GN=DNAJC11 PE=1 SV=2	DNAJC11	Q9NVH1	63279.2	Mitochondrion {ECO:0000269|PubMed:25997101}. Note=Isoforms show differential submitochondrial localization. A 57 kDa form (potentially isoform 3) shows either mitochondrial matrix or innermembrane (IM) localization, possibly anchored to the IM facing the matrix. A 35 kDa form behaved either as an inner membrane space (IMS) or an IM protein exposed to the IMS. {ECO:0000269|PubMed:25111180}.; [Isof…	[Isoform 1]: Required for mitochondrial inner membrane organization. Seems to function through its association with the MICOS complex and the mitochondrial outer membrane sorting assembly machinery (SAM) complex. {ECO:0000269|PubMed:25111180, ECO:0000305}.	0	4.27356e+06	3.18895e+06	3.10864e+06	4.09318e+06	6.44966e+06	4.61503e+06	4.00072e+06	3.66215e+06	4.62256e+06	4.2907e+06	4.88787e+06	5.0261e+06	0.519935	0.882185	0.216817	0.537242	0.426234	1.29548	3	2	2	0	4	2	0	2	3	0	0	2
FAST kinase domain-containing protein 2, mitochondrial OS=Homo sapiens OX=9606 GN=FASTKD2 PE=1 SV=1	FASTKD2	Q9NYY8	81465.7	Mitochondrion matrix, mitochondrion nucleoid {ECO:0000269|PubMed:20869947, ECO:0000269|PubMed:25683715}. Note=Localizes to mitochondrial RNA granules found in close proximity to the mitochondrial nucleoids. {ECO:0000269|PubMed:25683715}.	Plays an important role in assembly of the mitochondrial large ribosomal subunit (PubMed:25683715). As a component of a functional protein-RNA module, consisting of RCC1L, NGRN, RPUSD3, RPUSD4, TRUB2, FASTKD2 and 16S mitochondrial ribosomal RNA (16S mt-rRNA), controls 16S mt-rRNA abundance and is required for intra-mitochondrial translation (PubMed:27667664). {ECO:0000269|PubMed:25683715, ECO:000…	0	2.90256e+06	2.75154e+06	1.49915e+06	2.04173e+06	2.01921e+06	2.91492e+06	3.10134e+06	2.17776e+06	3.03392e+06	1.87329e+06	3.64921e+06	1.85768e+06	-0.0362307	0.0375817	0.216771	0.292519	0.0450549	0.0344385	3	0	2	2	2	2	2	0	3	0	2	2
Ubiquitin-conjugating enzyme E2 D3 OS=Homo sapiens OX=9606 GN=UBE2D3 PE=1 SV=1	UBE2D3	P61077	16688.1	Cell membrane {ECO:0000269|PubMed:18508924}; Peripheral membrane protein {ECO:0000269|PubMed:18508924}. Endosome membrane {ECO:0000269|PubMed:18508924}; Peripheral membrane protein {ECO:0000269|PubMed:18508924}.	Accepts ubiquitin from the E1 complex and catalyzes its covalent attachment to other proteins. In vitro catalyzes 'Lys-11'-, as well as 'Lys-48'-linked polyubiquitination. Cooperates with the E2 CDC34 and the SCF(FBXW11) E3 ligase complex for the polyubiquitination of NFKBIA leading to its subsequent proteasomal degradation. Acts as an initiator E2, priming the phosphorylated NFKBIA target at pos…	0	4.51404e+06	4.74464e+06	1.11483e+07	4.41982e+06	7.54205e+06	5.70374e+06	8.37147e+06	1.1467e+07	3.86296e+06	6.41699e+06	8.41624e+06	8.40073e+06	-0.208116	0.143999	0.215913	0.130232	0.187176	0.15507	2	2	3	2	3	0	3	3	2	0	2	0
ATP-dependent RNA helicase DHX30 OS=Homo sapiens OX=9606 GN=DHX30 PE=1 SV=1	DHX30	Q7L2E3	133942	Cytoplasm {ECO:0000269|PubMed:29100085}. Mitochondrion {ECO:0000269|PubMed:16825194, ECO:0000269|PubMed:29100085}. Mitochondrion matrix, mitochondrion nucleoid {ECO:0000269|PubMed:16825194, ECO:0000269|PubMed:18063578, ECO:0000269|PubMed:25683715}. Note=Localizes to mitochondrial RNA granules found in close proximity to the mitochondrial nucleoids (PubMed:16825194, PubMed:25683715). Relocalizes t…	RNA-dependent helicase (PubMed:29100085). Plays an important role in the assembly of the mitochondrial large ribosomal subunit (PubMed:25683715, PubMed:29100085). Required for optimal function of the zinc-finger antiviral protein ZC3HAV1 (By similarity). Associates with mitochondrial DNA (PubMed:18063578). Involved in nervous system development and differentiation through its involvement in the u…	0	2.19971e+07	2.73145e+07	2.39215e+07	2.90254e+07	2.08244e+07	2.43427e+07	2.40324e+07	2.73083e+07	3.36472e+07	1.69405e+07	1.79234e+07	2.44892e+07	0.0187768	0.0382308	0.21476	0.536421	-0.303171	0.749876	13	13	13	15	13	14	12	12	15	6	9	11
ATP synthase subunit alpha, mitochondrial OS=Homo sapiens OX=9606 GN=ATP5F1A PE=1 SV=1	ATP5F1A	P25705	59752.1	Mitochondrion {ECO:0000269|PubMed:30146159}. Mitochondrion inner membrane {ECO:0000250|UniProtKB:P19483}; Peripheral membrane protein {ECO:0000250|UniProtKB:P19483}; Matrix side {ECO:0000250|UniProtKB:P19483}. Cell membrane {ECO:0000269|PubMed:10077593}; Peripheral membrane protein {ECO:0000269|PubMed:10077593}; Extracellular side {ECO:0000269|PubMed:10077593}. Note=Colocalizes with HRG on the ce…	Mitochondrial membrane ATP synthase (F(1)F(0) ATP synthase or Complex V) produces ATP from ADP in the presence of a proton gradient across the membrane which is generated by electron transport complexes of the respiratory chain. F-type ATPases consist of two structural domains, F(1) - containing the extramembraneous catalytic core, and F(0) - containing the membrane proton channel, linked togethe…	0	1.15904e+08	9.60835e+07	7.93247e+07	1.11383e+08	8.23382e+07	112186071	1.08859e+08	1.41303e+08	8.74566e+07	1.38787e+08	1.11996e+08	1.28505e+08	0.0705303	0.123256	0.21283	0.337533	0.380728	1.0485	25	23	21	21	24	24	22	23	23	19	19	19
Condensin complex subunit 1 OS=Homo sapiens OX=9606 GN=NCAPD2 PE=1 SV=3	NCAPD2	Q15021	157186	Nucleus {ECO:0000269|PubMed:10958694}. Cytoplasm {ECO:0000269|PubMed:10958694}. Chromosome {ECO:0000269|PubMed:10958694}. Note=In interphase cells, the majority of the condensin complex is found in the cytoplasm, while a minority of the complex is associated with chromatin. A subpopulation of the complex however remains associated with chromosome foci in interphase cells. During mitosis, most of …	Regulatory subunit of the condensin complex, a complex required for conversion of interphase chromatin into mitotic-like condense chromosomes. The condensin complex probably introduces positive supercoils into relaxed DNA in the presence of type I topoisomerases and converts nicked DNA into positive knotted forms in the presence of type II topoisomerases. May target the condensin complex to DNA v…	0	5.93442e+06	4.40811e+06	9.01915e+06	8.57473e+06	8.11865e+06	6.35566e+06	8.57865e+06	4.31881e+06	9.51958e+06	2.89938e+06	3.84125e+06	5.54154e+06	0.251503	0.334536	0.211392	0.185307	-0.656639	0.687919	6	5	9	10	6	7	6	4	10	2	2	4
Succinate-semialdehyde dehydrogenase, mitochondrial OS=Homo sapiens OX=9606 GN=ALDH5A1 PE=1 SV=2	ALDH5A1	P51649	57214.9	Mitochondrion.	Catalyzes one step in the degradation of the inhibitory neurotransmitter gamma-aminobutyric acid (GABA). {ECO:0000269|PubMed:19300440}.	0	4.62908e+06	3.71849e+06	4.05213e+06	4.42479e+06	2.08714e+06	3.05257e+06	7.43184e+06	3.59928e+06	3.32331e+06	3.6199e+06	3.60974e+06	2.82535e+06	-0.374544	0.577899	0.211191	0.183686	-0.302393	0.978929	0	0	2	2	2	2	2	0	0	0	0	0
ER membrane protein complex subunit 7 OS=Homo sapiens OX=9606 GN=EMC7 PE=1 SV=1	EMC7	Q9NPA0	26470.7	Membrane {ECO:0000269|PubMed:22119785}; Single-pass type I membrane protein {ECO:0000269|PubMed:22119785}.	0	TRANSMEM 160..180; /note="Helical"; /evidence="ECO:0000255"	3.51119e+06	2.67142e+06	2.94666e+06	5.95961e+06	4.5867e+06	5.67012e+06	3.43179e+06	3.36395e+06	3.75493e+06	5.74699e+06	3.16757e+06	4.02567e+06	0.828886	2.08397	0.208763	0.795771	0.503293	0.729389	0	2	2	3	4	4	0	2	3	2	2	2
Ubiquitin thioesterase OTUB1 OS=Homo sapiens OX=9606 GN=OTUB1 PE=1 SV=2	OTUB1	Q96FW1	31284.6	Cytoplasm {ECO:0000250}.	Hydrolase that can specifically remove 'Lys-48'-linked conjugated ubiquitin from proteins and plays an important regulatory role at the level of protein turnover by preventing degradation. Regulator of T-cell anergy, a phenomenon that occurs when T-cells are rendered unresponsive to antigen rechallenge and no longer respond to their cognate antigen. Acts via its interaction with RNF128/GRAIL, a c…	0	7.64424e+06	4.60092e+06	6.11406e+06	6.75702e+06	4.71508e+06	5.04483e+06	7.81761e+06	7.76774e+06	5.62454e+06	5.73584e+06	5.8108e+06	6.3002e+06	-0.152559	0.221183	0.208231	0.346229	-0.0408365	0.0664442	5	3	6	4	4	4	4	3	4	2	0	4
[truncated: 1,035 more rows]

## Sheet: 2. PTBP1 enriched interactome
							Total Precusor Intensity (Imputation)
							GBP-HaloTag-NLS			GBP-HaloTag-NLS/POU2F1-GFP			GBP-HaloTag-NLS/PSMA2-GFP			GBP-HaloTag-NLS/PTBP1-GFP			HaloTag vs POU2F1		HaloTag vs PSMA2		HaloTag vs PTBP1											Enriched proteins in common (POINT & TurboID)
Protein name	Gene	Protein accession numbers	Protein identification probability	Subcellular Localization	Functions	Transmembrane	Rep-1	Rep-2	Rep-3	Rep-1	Rep-2	Rep-3	Rep-1	Rep-2	Rep-3	Rep-1	Rep-2	Rep-3	Log2(Fold change)	-Log(P-Value)	Log2(Fold change)	-Log(P-Value)	Log2(Fold change)	-Log(P-Value)										Protein name	Gene	Uniprot Number	Log FC	Log P-Value
[truncated: 47 more rows]

## Sheet: 3. POU2F1 enriched interactome
							Total Precusor Intensity (Imputation)
							GBP-HaloTag-NLS			GBP-HaloTag-NLS/POU2F1-GFP			GBP-HaloTag-NLS/PSMA2-GFP			GBP-HaloTag-NLS/PTBP1-GFP			HaloTag vs POU2F1		HaloTag vs PSMA2		HaloTag vs PTBP1
[truncated: 22 more rows]

## Sheet: 4. PSMA2 enriched interactome
							Total Precusor Intensity (Imputation)
							GBP-HaloTag-NLS			GBP-HaloTag-NLS/POU2F1-GFP			GBP-HaloTag-NLS/PSMA2-GFP			GBP-HaloTag-NLS/PTBP1-GFP			HaloTag vs POU2F1		HaloTag vs PSMA2		HaloTag vs PTBP1
[truncated: 17 more rows]

## Sheet: 5. Corum database
Corum Complex ID	Complex name	PubMed ID	Total Subunit Number	Matched Subunit Number	PTBP1	POU2F1	PSMA2
[truncated: 12 more rows]
